# Supplementary material
Source: publisher figshare collection journal article supplement (https://frontiersin.figshare.com/ndownloader/files/31070026)
Supplement: Supplementary file 7 [file 31070026]

**Supplementary File 1: CDS and Protein sequences of *C. chinense* MYBs**

>CcMYB3R-1 |Locus\_ID=BC332\_21354 |CDS\_len=3117 |strand=-

ATGGAAAGTGATAGAATAAGCACTCCTTCAGATGGCACTAGCAGTAGTTTCCAAAGAGTTCGATCTTTGCATGGGAGAAC  
TAGTGGTCTACGAGACGTTCCACAAAGGGGAGTGGACTCCAGAAGAAGATGAAATCCTATGCAAAGCTGTCCAACGTT  
TTAAGGGGAAAACTGGAAAAAGATAGCGGAATGTTTTAAAGACCGGACTGATGTACAATGTTTGCACAGGTGGCAGAAG  
GTTCTTAATCCTGAACCTTGCAAAGGTCCATGGTCTAAAGAGGAGGATGAAGTAATAGCTGAATTAGTTAAGAAATATGG  
CCCCAAAAAGTGGTCCACCATTGCTCAACATTTGCCAGGACGTATTGGAAAACAATGTCGGGAAAGGTGGCACAATCATC  
TAAATCCTGGAATAAACAAGGAAGCTTGGACGCAAGAGGAGGAGGTGACTCTTATTCATGCCCATCAAATTTACGGGAAC  
AAGTGGGCGGAGTTGACGAAATTTTTGCCTGGAAGGACAGATAATGCAATTAATAAATCACTGGAATAGTTCTGTCAAAAA  
GAAATTGGACGTGTATTTGGCATCAGGTGCATTTGCAAAGTTCCTACTCTGCCTAATGTCAACCATCAGAACCAATCAA  
TCCCGTCTTCGATAAAGTTGCAACAGAGTAGTGAAGATGATAGTGTTCGTAAGAAGGAACAGAAATGGAGGAAGTTTCA  
GAATGCAGTCAAAGTTCAAATCTTGCTGGCTGTTCCCAATCTACAAGTGACATGGGCAACACATTTGTATATACAAGAGA  
GGAGGGCAAATTGCTGGAGGATTCAAATTATAGGAAGGACCCAAGCGCCAGTTTCAGCACCGTGTCTGAATACTATACCC  
CAGCTTTTGAAGATATTACTTTTTTTCAGTGGCAGAAGTGCCAGTGAACCTTGCTGAATCCAAGCTCCTGGAGCATAACTTC  
TCACAGAACTGGGCAACATCCATGGGAAAAGATTGGCAGTTTAATCCAGATGACATACCTAATATTTCTCCTCTAGAGTT  
GATGCAGGATTCTTCAGGTTTCTTCATGCAGTGTCTAACTGGTACTGGGAATCATGACATGGTAACCTTTCCACAGCAAA  
ATGAAATGAAGTTTGAACAACATAATGATGGGAGCATGGTTGTGGGGTTACATAAGCCGAATGAGATGTTTACTTCTGTG  
GAGGGTTGCAGTATGGTATACCCTGAGGCAGGGATTCTCAATGCTTTCCTTCTGAAATTGGTATGAATGGTGTAGATGA  
AACTGCCGTTCTATGATTTATCAGATCTCTGAAGGTGGAATATGTCTATAGAAAAGTGCAATCCTCTCTTTTCAGATG  
TTATGGAACTGCATCCTGTCAACCCTGTTCTGTTCTTCACAGTTTTCTTCAGAGCAAAGCTCACACATGTTTGGTATT  
GCCTCAAATCAGTTTCATAACCCTTTGCACACAGCTCGTGAGTCCCAAACAATAAATGTGATGGTTTTCTATATCCCAT  
GGAATCTGATACTCCTTGTGACAACATAATGGATAATCCTCTCCTGAAAGACCAACTGGATCAAACGTGAGATTCTGTAC  
AGCTAGTTTCTGTGAATGATTTTCGCTCAACTCCTTCAAATACTATTCAAACATGTCCATTGGTAAATGAAAATCAACT  
GTAAAGGAAGACCAGATGGATGGGGGGGCCCTATGCTATGAGCCTCCTCGCTTTCGAGCTTGGATGTTCCATTTTTCAG  
TTGTGATCTTATACAATCTGGTACAGATACACACCAAGAGTACAGCCCTCTTGGCATCCGCCAGTTGATGATGACTTCTG  
TGAAGTGTCTTACTCCATTTAAGTTGTGGGATTACCAACAAGAGATGGTAGTCCAGATGCCGTCTTGAGAAGTGCTGCC  
AAAACCTTTCACAAGTACACCTTCTATATTAAGAAACGGCACCGTGATTTGGTGTACCTTTGTGAGAAAAGAGATGTGG  
AAAGAACTTGAAAGCGATCTCTGTCAAGAATCATTTTCTAATCTGACTAAGGATTTTTCTCGACTAGATGTTATGTTTG  
ATGACTCTGCAAATGAAAAAGCAATGCCTTCCCTAACTAAGGATCAAACCTCTGGAACCTCAAGCATCTGAAGATAAAGAA  
AACATAAATCCAAGTGAAGATGGACAAAAGGAGGAAGACAAGGGCCGAGATGGGCATTCAAGCTGTGGAACCTTCTGGGAG  
ACAGTTAGATGGAGGTGAAGTTCACTATAAGGATCAAGGAACAAGGGAGAGCAAAAGGCTTGGAGCCAAAGATGCAGTTG  
GAAAGATAAAACAGCCTTCTGGAGTTCTAGTTGAAGTGAACGCAAGTGGTCTGTTCTTTTCTCCTGATCGTTTTGGAGCC  
AAGTCTGACAGAGGTTCAAATCTAAGCAATAAAGCTCTAGGAAATCAGTATTCTAGACGACTCGAAGCTGCATCAAATCA  
AGGTTCTGTTTCATCTTCATTTGAGACTTCAAGTTTCTCTGTTATTTGCTCTCCTCGTATACATGGAAAGAAAGATGGAA  
GTAGTTTTGTTATCACTACATCGATGCAATCTGCTCCAACATCAACTGCCTTGGAGAGCTCAGCTGAACTTCAGGAAAT  
GGAGCTGGAGCTGGGATTATTGCAAGCATATCTGGAGAAACACCTTATAAAAGGAGTATTGAATCTCCCTCGGCTTGGAA  
ATCTCCATGGTTCCTCAACTCTTTCCTGTCAAGCCCAGACTTGATAATGAACCTTACTTTTGAGGATCTTGCAGTGTTA  
TGAGCCCAGGGGACAGAAGCTATGATGCTATTGGATTAATGAAGCAATTGAGTGAGCAGACTGCAGGAGCATTTCAGAT  
GCCAGGAGGTCTTGGGAGGTGATACTCCAGAGTCAATCCTACGGGGGAGGAACTCCAAAAACCAGAATGCAGATGAAAA  
TCGTTCTCTTTGTGAGCAATGCTATGAGTGAGCGCGTACACTCGACTTCAGTGAGTGTGGATCACCTGAAAAGGAAA  
AGGAGACTGAAAAATGTAGTACAAACAACAACAGCTTTTCAAGTCCTTCTTCTACCTCTTGAAAGGCTGCAGGTAG

>CcMYB3R-2 |Locus\_ID=BC332\_00348 |CDS\_len=1902 |strand=+

ATGATACAAGTTAAAGAGGAAGCTTTGACTCTGGAATTTGGTGGATTCACTTCTTGCTCATCTTTTTCTGATAGCAGTTA  
TGAGGCTAGCACTCCGAGATGCTCCTCTGAGCCTGGTTCCAGTTGTCAAAGGAGCTCAGGTCAAACCTAAACGTTCTTCTC  
AGGCAGGCTGGACAGCAGAAGAGGACAATCTGTTGACTGAAGTGGTGAAGGTTCAAAGGAAGAACTGGAAAGGAATT  
GCTGAGTGTCTGAATGGAAGGACTGATGTGCAGTGTTCATCGCTGGCAGAAGGTTCTGAATCCTGAGCTTGTAAGGG  
TCCTTGGACAAAGGAGGAGGACGACCATATTATTGAGTTAGTTGAGAAATTTGGCTGTAAGAAGTGGTCCATTATTGCCA  
AGTCTTTGCCTGGTCGATTGGCAAGCAATGCCGGGAAAGGTGGCACAACCATCTTGACCCAACAATAAAAGAGATGCC  
TGGACTGAACTGGAAGATTTGGTCTATGCCGCTATCACCAATATACGGGAACAAGTGGGCTGAAATTGCAAGGTTTCT  
GCCTGGAAGGACTGATAATGCAGTTAAAAATCATTGGAATTCTACAGTGAAGAAAAGATTGGACTTGAATTTACTAAGTA  
GGTTAGGGCCGATATCCAAAGTGAGGGATCTCCAGATTTCTCAAGTCAACAAGAAAAAAGTAGAGATCAAGAAGCATTTA  
GCACAGGCTCATAATGCAGAAACACTTTCTTTGAGCAAGCAGGAGGAGTAGATAATGCTGCTGATGCTTGTCAACTGA  
TCTAAGAATTGGGTGTGCTTGTCTCCTCGAAATGATTTGCACAAGGGTACTTCTTTATTTGGAGCCTGTAAATCATCAG  
TAAAGAATGCAAGGGATCTGATAAAGCCACTTGGTGAATACAGTTTGGCAAGGCAGAAATCTTCCAAATGGTGAGACC  
GACCAATCCAATTTAAATCTTACTAAAATATCAGATCCTCTCTTGACCTCTTTAGATTTTCTTTGGATCCGTACGCAA  
GACCAGATGGAGTAGTTCTCAAGTTAAGGCTGTTACCCTACTACTTTTGGGAGAATGTATGAATCTCCCAAAAGGTCTA  
AGTACGGCACTGTTAGTGACACTGACCATGATTTTTTGAATTTGTATTGGCTGGCTTACCAGAGGTTCAATCCCAAGGT  
AACAAGAAGAATAAAGCATATGATATACAATCTTCTTTGGCTCTCAAGCAGCCCGGCTTACCAGAGGTTCAATCCCAAGG  
TAACAAGAAGAATAAAGCATATGATACCAATCTTCTTTGGTCTCAAGCAGCCCGGCTTCAAAAGATTCAATCCCGGG  
GTTACAAGAAGAATAAAGCATACGATACACAATCTTCTTTGGCTCAAGCAGCCCGGCTTCTTGAAATTATGAACCACCA

AAAGTAAAGGACTTGACGATTCCATTAACGGATGAAAACCTTAGTAGAGACAACATTATCGGGCGACAAAATAGCCATCT  
ACTTTGCTCTACACCTCTTAGTTTAACAGTCTCTGCTAATAGTAGCAGTCCAGAATCTGTTTTAAGGAATTCTGCAATGA  
GCTACACAAAACTCCTTCAATCATAAGAAAGAAGACTTCGAGATTTTCAGAAGCTTCTGGGCATTATAGTTGCACAGGC  
ACCACCACACCCATGCATTTTCTCCGGAGTGTTCCCGACAGGGAAGACACCTCAAACCTGAAGGACAGGATTTCTGGATG  
TAAAAGATCTGTTTCAGGAAAATCTCTTGGAAGACGACTGGAATATGCCTTTGACATGGAATGGGATTCTTCTAGATGTT  
GCACGCCAGTTTCTGCAGCTTACCTTGTGCTATTGGAGCTAATACAATGTTGACACCATAA

>CcMYB3R-3 |Locus\_ID=BC332\_23333 |CDS\_len=1356 |strand=+  
ATGGATGAATTGCAAGTAGAGGAATGCTGTATTGAGAATAAGCAATCAGTTGCTGCTTCGAGCTCGTCGGTTTTCTGAAAA  
TAGTGGTAGTGTTAATTTAAGGTCACCAGCAGTATCTAGTCCAACCCCTGTATCACCAACTCACAGGAAAACCACTGGTC  
CAATAAGGCGAGCAAGGGGTGGTTGGACACCTGAGGAGGATGATACTTTGAAAAAGGCTGTTTCAGTTTACAGAGGCAAA  
TGTTGGAAGAAAAATAGCTGAGTTGTTCCCGATAGATCAGAAGTGCAATGTCTGCATCGCTGGCAGAAGGTTCTCAATCC  
AGAACTTGTTAAAGGACCCTGGACTCGGGAGGAGGATGATAAGATTATTGAACCTGGTCGCTAAGTATGGGCCGATAAAAT  
GGTCTGTCATAGCTAAATCATTGCCTGGTGAATAGGGAAGCAATGTCGTGAGAGATGGCACAATCATTTGAATCCCAAT  
ATCAAAAAGGATGCTTGGACACTGGAAGAGGAACGGGCACTTATAGATGCTCATCGGATCCATGGTAACAAGTGGGCTGA  
AATTGCTAAAGTTCTGCCAGGAAGGGCTGATAATGGAATCAAGAATCATTGGAACAGCTCTCTGAGGAAGAAGTTAGACT  
TCTATTTAGCTACTGGAATCTTCCATCTGTAAATCTGAAGAGCTACTAGTTTGCTCAATTAACACATCAGAAGCAGCT  
GACGTAGTTTCATCAGGAGCTATAGATATATGTAAATAGAAAACGGATGGCAGGTGACAGAAATCAATGGTGGTCTCA  
AGCTGAATCCACTGATTCTGAAATCGTCAGGTTGGAAGCTCAATCACCAGAAGAAGATGCTATTCAACACATCAACAAAA  
GTACAGAATCAGAAAACAGGTGTAATGGCTGGAACATAGATAGTGCAGTAGGTGATTACAAGTTTTTGAAGCACCATTT  
CCTTGTGAAATCTCGACATGTGGTAGGTTATACTATGAACCACCAAGGTGAGAAAGTTGATTCCACTGGATTGAGATCT  
TCTAAATATCGGCTGGGCACAATGTGCATCTGATGCAAGTCCAAGCCCGTCACCAAATGGTTTCTTCACTCCACCTAGTA  
CAAAGGACCATAGCCTATATGCACAACTCCTGAATCTGTACTTAGAACTGCTGCTAGAAGCTTCAATACGCCGTCCATA  
TTAAGGAAAAGAAAGTCTCAAGGTAACTTTGACGCCAACTAATAAAATGAGGAAGTCAGATGGAGATTTCTGTAAGGA  
CAAACCTATTGATGCGTGTGACAAAGTCCAATTCGACAGCTCAGACAAATCTAGCATGGATAATGGAGTTTCTTAA

>CcMYB3R-4 |Locus\_ID=BC332\_29224 |CDS\_len=2988 |strand=-  
ATGTTGGATTATCAAGATTTGTCTTTGTCTCAAGCAACCATGGAAAGTGATGAAACAAGCAAGCCTCCTTCAGATGACAT  
CAGTAGTCGGCCTTTGCATGGGAGGACGAGTGGTCCTAAGAGACGTTCCGTAAAGTGGACTCCCAGGAGGATGAAATCT  
TGCGCCAAGCTGTCCAACAGTTTAAGGGGAAAAGCTGGAAAAAGATTGCGGAATGTTTTAAAGACCGGACAGATGTTCAA  
TGCTTGACAGGTGGCAGAAAGTTCTTGATCCCGAAGTTGTGAAAGGTTTATGGTCTAAGGAGGAAGATGATAAGCTAAT  
CCAATTAGTGAACATACATGGCCCCCAAAAATGGTCCAATATTGCACAAGAGTTAGCAGGACGTATTGGAAAGCAATGTC  
GGGAGAGATGGCACAATCATTTGAATCCTGAAATAAAGAAAGAAGCTTGGACAGAAGAGGAGGAGTTGACTCTAGTTCTGT  
GCCCACCAAGCTTATGGAAACAAGTGGGCAGAGATATCAAAATATTTGCCTGGAAGGTGAGACAATGCAATAAAAAATCA  
CTGGCATAGTTCTGTCAAAAAGAACTGGCGTCAGGTTTACTTGACAGTCCCCTGCTCTGCCTAATGTCAATCATCAGA  
ACCAATCAATCGCTTCTTCTTCTATGAAGTTGCAAGAACTAGTGAAGATGAAAGTGTTTATAAAGAAGGAGCGGAAGTG  
GAGGAAGTTACAGAAATGCAGTCAAGGTTGACTCTTGCTGGCTGTCCCCAGTCTACAAGTGACTTGGGCAACACATTTAT  
GCATATAAGAGAGAAATGATGCAATGTTGGAGGAATCAATCCATAAAAAGGACGCAAGCTCCGGTGCAGCACCATGTCCTA  
GGAACAGTGCCTCAGCTTTTCAAGATGTCTCTTGTTCAATGCTAAATGTTCCAGTGATCTTGTGGATTCCAAGTTCTC  
GAGTACATGTTCTCACATGACGGGGACAATTCACAGAGAGAGATTGGCAGTTTAAATATGGATGACTTTCCAGGGTTTAT  
TGAGGAATTTTCAGGACATTACATGCACTGTTGCAATGACAATGAAAACCATGCTATGGTAGCCGATCCATTGCAAACCTG  
CAATGGGATCTGGAGCAACTTCTAATGCAGCGAACATGGTTGAGGTTCCATATAAGCCCAATGAAATGTTTGATGGTTGC  
AGGATCGTGTATCTTGAGGAGCAATTTCTCAATGCTCTCCGTCCGAAATGAGGTTTAAATGGCACTGTTGATGCACTG  
TTGTTAATTTACCAATCATCAAACATCAGATCCCTGAGGAAGGAAATATGGCTCCAACAAAGTCAACGCTTTAAGTT  
TTGATGACGTTGAAGCTTCAACACATCAGCAATTTTCTGTTCTTCTCGCACTTTTCTTCTGAGGATAGATCACTTGTGTTT  
GGTATTGCTTCAGATCAGTTCCATTATCCTCCGCTTGAGAACTCAGTTCTAGAGTCTTCCACCAGTAGATGTGATGATTT  
TATATGTCCAAGTGAGTTTGGCAGTCTTCCAATGACAATGGCATAGACAATGCCGTCCTGAAAGATCTACCTGATCATA  
CAAAAGATTCTCAAGGCTAGAAGAGCAGAAAGATGGAGGAGCTCTATGCTATGAGCCTCCTCGCTTTCCAAGCTTGGAT  
GTACCCTTCTTGATTGTGATCTTATACAATCTGGTTCAAATACACAGCAAGAGTACAGCCCTCTTGGCATCCGCCACTT  
GATGATGAGTCTGCGAACTGCCTTACTCCATTAAGGTTGTGGAATTCACCTTCAGGAGATGATAGTCCCAATGCTATCT  
TGAAAAGTGCTGCCAAAACCTTCACTGGGACACCTTCTATAGTAAAGAAGCGACAGCGTCACTTGGTGTCTCCTCTATCA  
GAAAAGAGATGTGAGAAAAAACTTGAAAGTTATCTAAATCAGGAATCATTCTCTAATATGGCTACAGAAATTTCCCGAGT  
AGGTGATATGTTTAAATGAGTCGGCTAATGAAAAGCGTCTACTGAAGACAAAGAAAATTTACATCCATCCTCAGAAGATG  
GAAGAAAGGAGCAGGTGATGGAGTAACTGGACTTTCTTGCAATTGAAAATTCAGAGAGGCAATTAGATGGTGGTGGTGCT  
CACTACCATAAAGATCCCAATAGTGAAGTGCTGGAGCCAATGATACACTTGAAAGGTAAAACAGCCTCCTGGAGTTCT  
GGTTGAGCGTAGCTCAAGTGATATGCTCGTCTCTCTGATCGTTTTTTGATCAAGTGTGATAGAGCTACAAGTCTAAGTA  
ATAAAGCTTTAGATAACCAGTACGCTGGACAGCTTGAAGCTGCATCAAATCAAGTTAATGTTTCATCCTCGTTTGAGACT  
TCATTCTTGTCTGTTTTTTGCTCTCCTGACATACTTGGGAAGTGTGCAAGCAGTGTTGTCAAAGCTACATCAATGCAATC  
TACTACATCAACTGCATTGGTGAATACAGCCGAAAATTTGAAAAGGATTTGGTGCTGAGACTTCAAACATATTTGGAG  
AGGCGCCTCTTAAAAGGAGTACTGAATCTCCTTCAGCATGGAATCGCCATGGTCCTTGAACCTTTTTCTGCCAGCCCA  
AGATATGACACAGAACTTACATTTGAGGATTTTGCGCCTTTTATGAGTCCAGGTGAAAGAAGCTATGATGCTATTGGGTT  
AATGAGGCAATTAAGTGAGCAGACTGCACCTTCAATTGCGGATGCCCGTCAGATCTTGGGAAGTGAAACTCCAGAAACAA

TTCTGTCTGAAGAGAACCAAGCAACAGAAAGCAGATGAAGATTGTGCCCTTCTGGCTTCAAATGCAATGAGTGAGAGACGC  
ACGCTTGATTTTCAGCGAATGTGTAACACCGCCGAGAAAGGGCAAAGAGACTACCAAATTTGGCAGCGTTTCAAGTCCTTC  
CTCCTACCTGTTGAAATGTTGCAGATAG

>CcMYB3R-5 |Locus\_ID=BC332\_25921 |CDS\_len=1689 |strand=+

ATGTTAAATGGCAAGATACTAATGAGAACCCTGGTCCAATTAGACGAGCAAAGGGTGGTTGGACTCCTGAGGAGGTAAT  
CCGTTTTCTGATAAGAATCATCTATTGATTATAAACTCCCCAATGCCACAGGACGATACTTTGAGAAGCGCTGTTGCAG  
CTTACAGGGGGAAGTCTGGAAGAAAATAGCTGAATTTCTTCCGGATAGATCAGAAGTGCAATGCCTGCATCGATGGCAA  
AAAGTTCTGAATCCAGATCTTGTAAGGACCCTGGACTCAAGAGGAGGATGATAAGATCATTGAACTGGTGGCTAGGTA  
TGGGCTACAAAATGGTCTATCATAGCCAAATCATTGCATGGTCGGATTGGGAAGCAATGCCGTGAAAGGTGGCACAATC  
ATTTGAATCCAAATATTAAGAAAGATGCCTGGACATTGGAGGAGGAATAGCACTTGTAGATGCTCATCGGATCCATGGG  
AACAAGTGGGCTGAAATAGCTAAGGTCTACCTGGAAGGACTGATAATGCAATCAAGAACCATTGGAATAGCTCTTTGAA  
GAAGAAGTTAGACTTTTATTTGGCTACTGGAACCTTCCACCTGTTGGAAGAGATGGTCTCAAAATGGTTGTGAGAACA  
ACATCTTTACAGCTTCGGCTGAAAAGGCTCTTGTTTACTCACATAAAGGATCAGATTCAACTGAGCTTGCCTCGTCAGGA  
ACTACTGACATATGTAAAATAGGAAATGGTGGTATGAATCATCAAGATGCCAAGCTGCTGGTTGCAAATATCGATGCTTC  
CAATAGTGGTCTCAAAATGAGTCCACTGATTCTGAAGTTGTTAGATGGGAGGCACAGTCACCAGCAATAGATGGTATCC  
ACGTTAAACCAATTACAAAATCAAGTTTGATGGATATGGAACAAATAGTGTCGTTGATCTTAAAGTCATTGAACTCCA  
TTTTCTTGTAATACCTACATGTGGTACACTGTATTATGAACCACCACAATTAGGAAGTTGTATTTCAATGGATTCAAA  
TTATCTAAATATTCGATGGGCTCATTCTGGCCCAAGTCCAAGTTTATCACCTAGTTCTTTCTCGACTCCACCTAGTAGTC  
TGAAGGGGAGTAGTTATGCACAAACCCCTGAATCCATATTGGAACCTGCTGCTAGAAGCTTCCCAAATACGCCTTCATA  
TTCAGGAAGAGGAGTTGAGCTCCACCACGCCAGGTAATAAAATTGGTAATGCAGATGAAGATATGCGTAAGGAAGAACC  
ATGTGACACTTGTGAGGAGAAACAAGTGGACAGTTTCAAGAAAATATGGCATGAATAGGGGAAGTTCTTCGAGAAATCTG  
CTTACAATGGCATTGGACCATGCAATACCAGAGCTTTTAAATGCCTCTCCTCCATATCGGTTAAGGTCTAAACGAAAATCC  
ATCTTCAAGTCTGTGGAGAAAAGCTTAAGTTTGCAATTTGACAACGAGCAGCACAATACTAGTAATGATTCAACTATCAA  
AGAGATATCTCATGTAGCAGATTGTTTACGTGCAACAAAATGGGTTTTATGCTAGAATCAGTGTTTAAACCTGGTATTA  
TCCGTGACACTGGCTGCCATGCTGTTGGATTTTTTGTAAAACCTCATCAACTTCAGAAGAATTCACCTTGCATATTATCAT  
TTATGTTAG

>CcMYB5R |Locus\_ID=BC332\_09390 |CDS\_len=2985 |strand=-

ATGGCCTTCGATTCCGACGACGATGATTTCTCCGGCACCGATTCCGATGAAGGCTTCCAAGCAGATATGGAAGCTCTCAA  
AAAAGCTTGCCTTCTCTCCGGCAAAGACGCCGACGACCTACAACCTTCATCTTCTCCGCCGATGGACACGTCGCCGGCG  
CGAATGATGTAACGCTCTCTGATACTGACGCTGATGAGGATGAGGATGATGACTTTGAGTTGGTGCCTAGTATACAAGAG  
CGATTTGCCCTATCAACGGAGGTTACGACCCTATAAGTATGAAGCCGTTGTGCTCTATTCTTCCACCTGGTTTCAGAGGG  
TGATGAGGACGATGATTTTGAACCTTACGTGTTATTCAGCGCCGATTTGCGGCTTACGGTGACGATAATGGGAATGGAA  
GAGAGGAGAGTCTTTTTGATAAATTTGAGCAGATTTCCGAAGAATGCAGTAATGACGTTGCTAGGTCTAAGAATCTCACT  
GATGGACATGATTCTGATGCTGAAACCACAGCTATATCAGTTAATTTCTTCTCGCTTCCCAAATCAGCACATGCATTTGT  
TGATGCCATAAAGAAGAACAGGGCTTGTGAGAACTTATTCGAGAGAAGATGATGCAAACCTGAAGCAAGGTTGGAAGAGT  
TGAAAAAATTAAGGAGCGGGTCAAGATCCTAAAAAGCTTTTCAAGTCACTTGCAAAAAGAAAATGGGGCGAGCATTGTCA  
CAGAAAAGAGATGCTCGTGTCCAGTTAATTTCTTTGCCAAAGCAAAGGTTTCAAGTCACTTGCAAAAAGAAAATGGGGCGAGCATTGTCA  
TGCAATACATTCTGGACCTCTGAGAAATTTCTCATGTTGCTAGCTTTAAGGAGGCAATTGACACAATTTGCTGTCTCATTGA  
GTCGCAAGGATTGGTCCAAGGAAGAGAGTGAATCTTGCAGAAAGGAGTGAACAACAATTTCAAGAGATGTTGCTTCAA  
CGCTCGTCAATTTACCTGTCAATCTACTAAGTATGAGGATGGATGTTCTAGAGAATCTGGTGATCTTGATGACGTTAT  
TGCTTCAATCAGAGACCACAAGATTACCCCCAGACCATGAGGTCAATTTATACCCGAGGTCAATTTGGGATCAAGTAGCTT  
CCATGTATCTTCTGCTGTTCTGGTGGTGAATGTCAGTCAAGGTGTTGAAGTGGGAAGACCCCTTGAATTAACATGAA  
GGATGGGATTTATCAGAAGAAAAGAACCTATTGCAAGTTGTCCAGCAGCAAGCAATGAGCAACTGGGTTGATATTGCTGC  
ATCATTAGGGGTGTCTAGAACTCTTTTCAAGTCTTATCACATTATCAGAGGAGTTTGAATGCTTCAATCATTAGGGGGG  
ACTGGACAGATGAGGAGGATAGTAGACTCTGTGCTGCTGTGGAGACTTTTGGTGAGAGTAAGTGGCAGGTTGTTGCTTCT  
GTCATTGAAGGCCGAACAGGCACTCAGTGCTCCAACAGGTGGATTAAATCTCTTCATCCAGCAAGGAGAAGGTGCGGGAA  
GTGGAGTGCCGATGAAGATAAGCGTTTGAAGTTGCTGTAATGCTTTTTTATCCTAAATGTTGGAGGAATATAGGTCAAT  
CTGTGCCTTGGCGCACTCCAGTTTGAAGAAGGTAGCTCAATATGTACCTGGGAGGACTCATGTACAATGTAGAGAAAAGA  
TGGGTCAATACCTTAGATCTTCTTTGAAGCTGGATGAGTGGACAGAAGAGGAGGATTTGAAGTTAAAATCAGCCATTAA  
TGAACATGGATATTCCTGGTCCAAGGTTGCTGCATGTGTTCTTTCAGTACTGATAATCAGTGTCGAGGAGATGGATGG  
TGCTATTTCCAGATGAAGTTCTATGCTGAAAGAAGCTAAAAAGATACGAAGGGATGCTTTTATTTCAACTTCGTTGAT  
AGGGAGGAGGAAAGACCTGCCCTTAAACCAATGACATAGTTCTGGCACATAAACTTAGTAAAGCTGGATGTGAACTAC  
TTCTGCTAATAAAAAGCGGAAACGACGGCCAGAACAGCAAAGGATGATAAGACTCCCAAGTGTGATGCAGTACGTGAAA  
TGGAGAAGCAACACTCGGAGGGGAGTGAAGGTCCAGAGTCTTCTGATCTTATAAACAACCAGGAGAGTGATAAGATTTTG  
GATGGTGAAGAGGCGGTTGAACAGGGTTGTAATGATGCAAGAAAGAATAAGAGACGGTCTAGACGGCATCCGAGAAATAC  
AAAGAAAGTTAAACCAATGATAAAGTTCCAGAGGCTTCTGCTTCCAGTGCAGGTGAGTCAACTGTTGCAGATGACAATA  
TCTGCAAGAGGAGGAGAACCAGTTCGCTAGTGAAGAAAAGAGTAGAACTATCGCTTCTGCTTCCATTACAGTGGATTCT  
ACTATTGCAGATGGCAATAGCTGTAAGAGGAGGCAGAGAACCAGTTCGCAAGTGAAGAAAAAGAGTAGTGATAAAAATGC  
AAGACGGTTAGAACTTCTGCAGTACCTGGCACTCTGGGAGGTGGCACTTCTGGAGCTTCCGTCCGTCCACAAGCTTAATA  
AATGCAATCAATTGAAGAATGATGATAGATCTTGGTAGGGAATCTGCCGGAACAGTAGGTGACTGCATGACCTTGTCT

TCCTTTGTCCGTAAATCACGAGCAAAAGGATGTTTCATTGTCTTTTACAAAGGTTGCCAGGTTGCATCCAGACAAAGCTCA  
AGGTAAGGCTATGGCTGGAGATCACTCTAGCAGATCTTGTATATCTGGTGGTCATGATGAGACGGAGAAGAGAACTAGCC  
AGGAATGCACAAGTTCCAATCAGATATCAGGGACTGAAGTAGGAGATGACATGCCCTCTCTCTTTTATGGGCAAAAGTG  
AAAAGGGAGAAGATTGAAGTAGGGGATGACATGCCCTTGCTTTTTTATAGGCAAAAGTGAAGAGGGGGCAACCATCTGG  
AGCACAAAGATAGGAAAAGGAAGTAG

>CcMYBCDC |Locus\_ID=BC332\_12725 |CDS\_len=3468 |strand=-  
ATGAGGATTATGATAAAAGGAGGAGTATGGAAGAACACGGAGGACGAGATTTTGAAAGCGGCGGTAATGAAGTATGGGAA  
GAATCAATGGGCTCGTATTTTCGTCTTTGCTTGTTTCGTAAATCGGCGAAACAATGTAAAGCTCGCTGGTATGAATGGCTTG  
ATCCTTCAATTAAGAAGACTGAATGGACTAGAGAGGAGGATGAGAACTACTTCACCTTGCAAAGCTCCTGCCACTCAA  
TGGAGGACAATTGCTCCAATTGTTGGTCGTACACCATCCCAGTGCCTTGAACGTTATGAGAAGCTTCTCGATGCAGCATG  
CACCAAGGATGAGAATATGATCCTAATGATGATCCAAGAAAATTGAAGCCTGGAGAGATTGATCCTAACCCGGAATCCA  
AGCCTGCTCGGCCTGACCCTGTTGATATGGATGAGGACGAGAAAGAAATGCTTTTCTGAAGCACGAGCTCGGTTGGCCAAC  
ACAAGAGGCAAAAAGGCTAAAAGGAAAGCCAGAGAAAAGCAGCTTGAAGAGGCGCGAAGGCTTGCTTTTACAGAAGAG  
GAGAGAACTGAAGGCTGCTGGAATAGATGTCCGTCAAAGGAAGAGAAAAAGGCGAGGTATTGATTACAATGCTGAAATCC  
CCTTTGAAAAGAAGCCTCCTCCAGGCTTCTATGATGTTACTGAGGAAGATCGTCCAGTTGATCAACCCAAGTTTCCAAC  
ACCATTGAGGAACTAGAAGGTGAGAGGAGAGTTGATAAGGAAGCTCGCCTAAGAAAGCAGGATATTGCGAGGAACAAAAT  
TGCTGAAAGGCAGGATGCCCTACATCCATATTGCATGCGAATAAACTTAATGATCCAGAAGCAGTGAGGAGGAGGTGCGA  
AACTGAATCTTCTGCACCACAGATTCCAGACCATGAATTAGAGGCCATAGCAAAGATAGGTATTGCCAGCGATTTAATA  
GGGGGCGATGAACTGTCCGAAGGAAATTCGCGAACGCGTGCTCTTCTTGCAAACATATGCCAGACACCACAACATGCAAT  
GACTCCTATGAGAACACCTCAAAGAACCCCTTCAACTAAGCAAGATGCCATCATGATGGAGGCAGAAAATCAGCGAAGAT  
TGACTCAATCTCAGACACCATTACTCGGAGGGGATAATCCTCTGTTGCACCCCTCAGATTTCTCGGGAGTCACTCCTAAG  
AAAAGGGAAGTGAAACACCAAATCCACTTTTAACTCCTTCAGCAACTCCTGGAGCCACGGGCCTTACTCCTAGAATTGG  
CATGACGCCGTCCAGGGATTCTTATGGCATGACCCCAAAGGAACCCCTAGGGATGAGCTACGCATTAATGAAGAAATGG  
ACAATAATGCTAAATTTGGGCAATTTAATTCAAAAAAGAATTACTTTCTGGTTTGAGAGGCCTTCTCAGCCCAAGAAC  
GAGTACCAGATAGTCGTCCAACAACCTCCTGAAGAAAATGAAGAACCAGAAGAGAAGATTGAAGAAGACATGTCTGATAG  
GATTGCTAGGGAGAAGGCTGAAGAAGAAGCAAGGCAACAAGCTTTACTCCGAAAAGGTCAAAGTATTGCAAAGGGAGC  
TCCCTAGACCTCCTATTACTTCACTAGATCTAATTAGAAGATCCTTAATGAGGTCTGATGAAGACAAGAGCTCCTTTGTT  
CCTTTTACACTAATTGAGCAGGCTGATGAAATGATTAGAAAAGAAGCTTGTTGCTGTTGCTGGAACATGATAATACCAAGTA  
TCCTCTAGATGAAAAAGCAGAGAAGGAGAAGAAAAAGGGGGTCAAGCGAAAAGCGGTTGCTGAACCTGCTATTGAGGATT  
TTGAGGAAGATGAACTAAAAGAGGCTGATGAATTGATCAAAGATGAAGCTCAGTTTCTTCGTGTGGCAATGGGACATGAG  
AATGAATCTCTTGATGACTTTGTCCAAGCACATGAAACAACCTTTGAATGATATCATGTACTTTCTACCCGGAATGCTTA  
TGGTCTCTCAAGTGTGCTGGAACATGGAAAAGCTGGCTGCTTTGCAGAATGAGTTTGAGAATGTGAAGAAGAAAAATGG  
ATGATGATACTAAGAAAGCAACAAAACCTTGAACAAAAGATCAAAGTTCTCACTAATGGATATCAGATGCGAGCTGGAAAA  
CTTTGGTCAGAGATAGAGTCAACCTTCAAGAAAATGGACACAGCTGGGACAGAGCTTGAATGCTTCCGAGCATTACAAAA  
ACAAGAGCAGTAGCAGCAACCCACAGGATCAACAATATGTGGGAAGAAGTTCAGAAGCAAAAAGAGTTCGAGCGTACTT  
TACAGAAAAGGTACGGTGACCTCGTAGCAGAAAAGCAAAAGATTCAAGCAACTCATGGATGGGCATAGAATACAAGCTCAA  
ATTCAGGAAGAAATTGCAGCAAAAAATCGTGCTCTTGAGTTGGCCAAAGCAGAAATGGCAGAAAAGGATCGTGCCCTTGA  
GTTGGCCAAAGCAGAAATGGCTGAAAAGGAGAGTGCTCTTGAGTTGGCCAAAGCAGAAATGGCAGAAAAGGAGAGTGTA  
CATCTGCTGGTGATGTGGAACCTTCAGGTACTGGCCAGTGCTCCAATACAGAGGAAATTTCTGCTTCTGCCTCTCATGTA  
CCAATAGAAGCTGATGTGCATGTGGAGCCTTCAGGTACCGGTCACTACTAATCCAGAGGAAAATCATGCTTCTGCCTC  
TGATGTACAATCAGTCCAATTGAAGCTGATTATGTGCTGTGGAGCCTTCAGGCACCTCTAATGCAGAGGAAAATCTG  
CTTCTATTGAAGATGATTATGTGCTTGTGGAGCCTTCAGTACATCTAATGCAGTGGAAAATCTGCTTCTATTGAAGCT  
GATGATGTGATGATGAGCCGTGAGGTCCGGCCAGTCCCCATTCAGAGGAAAACCTTCTGCTTCTGCTTCTCCCATGATG  
AGTCTCTCTAGACGTTGAGGGACAGGTGAAAACGGGTCTGTTTTCCGCAATGGATGTTGAAGCCACAAGTGACCATGTAC  
CTATGGAGGGTCAGCAAAACCTAGTAGAAGAGAGTAATATGGATGTTACTAAAACAGAAGACTCTGGAGCAGTAGCAGGT  
GACGCGGATGTTCTTAAACAGAAGACTCTGGACTAGTAGCAGGTGACACGGACGTTTTTAAACAGAAGACTCTGGAGT  
AGCAGCAGGTGACGCGGATGTTCTTAAACAGAAAACCTCTGGAGCAGTAGCAGGTGACGCGGATGTTCTTAAACAGAAG  
ACTCTGGACTAGTAGCAGGTGACATGGACGTTTTTAAACAGAAGACTCTGGAGTAGCAGCAGGTGACGCGGATGTTCTT  
AAAACAGAAGACTCGAGAGTAGTAGCAGGTGACGCGGATGTTCTTAAACAGAAGACTCGGGAGTAGTAGTCACATGTGA  
TGGGGAGGCTAATGCCGGAAGTTGTAA

>CcMYB10 |Locus\_ID=BC332\_11130 |CDS\_len=930 |strand=-  
ATGGCAGAAGGTGGTGGTTATGGTGATGATACAAGAAGTAGTTGTTGTCCACGTGGCCACTGGCGGCCAGCCGAAGACGA  
AAGGCTCAGGCTGCTTGTGTAACAATATGGTCCTCAAATTTGGAAGCTTATTGCTGAAAACTTCAAGGAAGATCAGGAA  
AGAGTTGTAGATTGAGATGGTTTAAACCAACTCGATCCAAGAATTAATAGAAGGCCATTTACAGAAGAAGAAGAAGAGAGA  
CTTGTGCTGCTCATAGAATACATGGCAATAAATGGGCATTAATTTCAAGATTATTTCCAGGTAGAAGTACAAATGCTGT  
GAAGAATCATTGGCATGTCCTAATGGCAAGAAAGCAAAGGGAACAATCCAAGATTTGTGGCAAAAAGAAGCTTATACCAAC  
AACAACATGATAATTTTCTAAGTGATTCTAAATCACCTCCTATGGTTTTTCGACGAAGGAACATCAACAACAATAATAAT  
ATGACGAAAACACATGAAGGTAATTATGGCTCCAAAATCAACTTCTTTGAATTCAAAACCTTAACAAGATAGGGTTTT  
CTCAATGTCTTCTACATATTCTTCTAATTCACATGACTTTTGTAGAAGAAATGGGAGCCATTTGGTTAGAGAAAAGCTCAA  
TAGACCAAAAATCTTTATGTCAAATAATTTAAGCTTTTTAAGCCATGGAGGCGGAGCTAATTATAGTTACAAAAGGAGT

ACTATTATTCGAAACCCTTTTCAGTTATGCTGATAGAAATGAATCTAACGGCATAACAGAAAGGGTTGTGAATATTACCGA  
TGGTAAATTTTCCTTAGAGAAAATGCTTAGGGAAAGCATTGAACAACAACAACAGTATGGAGAAGAAGCAAGGGAAA  
GGAAGGATATTCCTTCATAGATTTTCTTGGTGTGGGGATTTCTTCTTGA

>CcMYB116 |Locus\_ID=BC332\_22985 |CDS\_len=2457 |strand=+  
ATGCAAATGGTGCACAGGTCTCCTTAGACTGTGACACATGCCTCCATCCCGAGACTTTTATGTGCAAGGATGGGTTTTTC  
TGGGGTAACACAAAATCCTGCAGTGGCACTGCCAGTGATACCCTCAAAGATCATCCTGTTTCACAGCAGTCTGTGCTGA  
CCCATGATCATGCAGTTACACAGCTGGTATCATTCTCCCAAGATCAGGTTATACTACCGCAGCCAGCCAAAAGACAGACA  
CGTCAATGGGCTGCATGGACACGTGAGGAGGAAGAAAGCTTTTTCTCTGCACTGCGACAAGTTGGGAAGAATTTTGAGAG  
AATTACTAGTCGCGTGCAGAGTAAAAACAAGGATCAGGTGAGACACTATTATTATCGTCTTGTGAGGCGCATGAACAAGT  
TGTTGGGTCCAGAAGCTTTGTCTGGATGCCAAAAATCCAAAGGAGACTAATGCTGCAATGCTGCGATGGTGGTCTTTACTG  
GAAAAGTATAGCTGTAAAGCTTCAAAGCTTCAATTTGAAACACGGAGATTTAAAATATTTTGTGAACTTTGGAGAGTCA  
GCTGGTGAAAGACCGCAAAAAGAATGTAAAAAGGCGTCCTTCTCAAGGAGAAAGTAGCTCTACAGCTGCAGCATCTCCTT  
CAAGTCATGGCAGAGTGTCAACTAATGATAGTCGACAGTTAAAGTGGTCTTCTTGACAACAAGGACGCACAAAAATTC  
GGATCCGGTAAAGGTCCTTCTGTAAAACGCAATGTCACTATGGGTGTTAACAGGGGGAATGTAAAGGTAGACTCTTCTGT  
GAAAAATGCTAGACATCGCCGAAGGACAGGTTCTTCATCAACAGCTGCATATAAAAGGTGGGAGAAGGCTGCAATTGCTG  
GAGTTTCATTGGTAGCTGATGCTGCCGAGCATTGGAGCGGACAACATTGATAAAGATGTTGGACCGGTCCAGAATTCA  
CAGGGTATAAATGGCTTTGAACATGTTGGCAAAGATGTGCATTCTTGTGCACTTTATCTCAAATTTTTTAAAGGAGAC  
CAATTTACAGAGTTGTATGAACTAAAGCTCCAAGTCTTCTGTTGATGAAGGAAGTGAAGAGCCCTGGAAATGGATA  
ATCATAACCCGTTCTTGGAACTCACTCTAAGTAATCGAAAAAAGATGTATCCGTTATGGAACATCTCAATCGTAAATGG  
GGAAGTTCAAGCATAGCAACTGGGAACTGGTGTCTTTTCTTTCCATGTACAGATGGAAGCCTGGTGCATCCCTGAG  
ATGGACCAAAGATACCACACAAATTGCAGCAGATGTGCATAATCTGATTGGAAGACCTCCAGTTTTCCGTCTCAAATATG  
GTTGGTTTCCAAATGCTGAGCTTGGAACTGCCAAGAACCATTGTATATACCGTTCCATTTGTGCAAAATACTAACACT  
AACATAACAAACGAAAAGAATGCGGAAATACCAGCATCTTCCCATGGTTCATTGTACGATTTTCTAAAGAACCCTACC  
TTCTAACCCAAGAATGACTGTGACATCTCCTCAAACAAGCTTGGTGAAGTCAAAGCTGCAAGCTAGCATGGGTCTGAATA  
CCTACACTTCTGATCATGATGAACTCTGCCTTACATAGAAGGGGAGAACTGGGATGCAACCACCGCGGAACAAGATGAC  
ATGCATGATATGCAGGGAACCAAGGCCAGTGTCTTGTGAGCAGGGGATTGGGAAGATAGCTTTACCAACATAAGTGTGG  
AGATCTTCTCTTTGATGCACCTGATGATGAGCAACAGACTGCGTTGACTCAGCTTTGCCCGGAAGCTCTCATTTTCTCC  
ATCAGACGCCATTAAGCTGCGACTCGTTTGTGAGCGATTGCTGCTCATATATATAAACATCAAAGCAAAGCTGATTCT  
CAGATGGCTCTTCCACCTCAAGCATCTTCCATTTGGAATGCTGAAGATACATGTGATGCTTTTGCAATTCAAGAAAAATGT  
TGCTTTCCGTGACAAAGAGCAGCGGTATCCAGCAATGTTGGTGCAGAGAATTCCAGCGGATTGCTCAGTCATCATCCC  
TGGTATTGGATGCAGGAATCAAGGATTTGCCTGGGAACATGGAATCGTTCACTGGCGAAACTGCTCATGAAGACCCAATG  
GATGAGTGTCAATCCGATGCACAAGCTTTGGATGGTCTGCAAAGGATCCTAATGGGCTCTCTGGCATATATTGGACAGA  
TTCTTTAGGACCGCTAGAATTGGACGCACCTTCATGTAGATATCATAATGAAGACATAACTCTGAGTGATAGTTTTGGTG  
GTTTGAACCGCTCATAGTTGACAGCCTGGATGCATTTCAAATTTGCTCGTTTTTGGGTTGGACAAGAAAGAGCCTGCA  
TCATCTACTGCTAAAGCTGTAGAGACTTCAGATTTAAAAATCGGCGCTGAAGTCTAA

>CcMYB119 |Locus\_ID=BC332\_09126 |CDS\_len=1542 |strand=+  
ATGGTGCAAAAAAGGCCATTTGGTGAAGAGGACCTGTATGAGGTTTCATCTAAGCAACCAAGATGTGAACCCAGTTGTCA  
GTTAGGTTCCGTTTTGGAACATTTCTCTGGAGGCTTATGCTTCAGGTGGTGTGAGGACAACCTTCAAGAACCATCC  
CTGATGCAACAAGAAACCTGATAGTCACAATGTGGCTGAAGTTCTTTTTCTTTTGATAAGGAACTGAGATGAGTATT  
CATGGATCTGCTTCAAACCTCTTCTGTCCACTAGTAGCACCAGTGAGGAAGAGATCATGCCTGAGGCGCCTTTTACAT  
ATTAACATCTCCTGAATATTACTATTTTGTATCATCCGTTCAAGGCTTCTGCTCATCACAGGGAGATACATTTCTCCCCTT  
TAAGTAATCTCAAAAGATGGTCCCTATTGGACATGATTTTCAAGGAGACTACCAGAATGGGATGCATATAATAAGGAT  
AACCCGTGCATAGATGGTATACATGAAACTCTGAGTCCTTCATCTCAAGCTGATGAAAATAAATTTGCTGGAAGGATAT  
CGTTCTGATGCCTAAAATGGAGCTACTTGCAGATAATGTTGAGAATATTGCAGAGAGAGGAGTTGAATGTTCTGTGAAG  
ATATAGGTTCCATAAGATGTGTTGGCTACACAACATTGAAGCAAGGGAAAAACTAAAGCTAGCCCTTGGCGAGGAGACA  
TTTGTAGATTGGGTTTTTGTGACATGGGAGAGGTTGTGGCTGAAAAATGGAGTGAAGAGGAAGAGGAATTATTTACGA  
GGTTGTATTGTCCAATCCTGCATCGCTAGGCAAGAATTTCTGGAACCATCTTGCTATTGAGTTTCTTTCACGGAGTAGGG  
AGGAGCTTGTGAGCTATTATTTTAAATGTCTTTATTTTGCAGAAACGTGCTGAGCAGAACAGATTTGATCCACTGAATATA  
GATAGTGATAATGATGAGTGGCATGAGACTGTTGATGATGCTGATGAGGGAGCCAAAATGACGGATGAAGATGAGGATTC  
TGTGGTTGAATCCCCAGCATATTATAATTATCTCAGCTATAATATGGGCCATGAGGAGCAGATAGACCAGCATGGGAAT  
ATTATAATCCTGTAAATTTTGGTAGCAGGAAGGTCTTTACTGATGTGCAGGAATCATGTCTGGGTAAAGTTGTTTGACAGT  
AACAGCAGTTGCAAACTTAGTATGCAGCCTCAAGACCAAGGACTACCAATAAAGTGGTTGAGCAAGAAGTCCAAGGAGG  
CTCCTGTATCACTGGTGCAGCTGGGGTTACTTCAGAATCGTCACTAGGGAAGACCAACAACAATAAACATTGGGCAAGTG  
ATATTGCTGGTACGGGCATTGGCACCAACCATGACAGTCTGTTGGAGCCATCTAATCGAAAGAATGGGATGTTGGATAC  
TTGAGCTGTGCCAGAAACAAAGTTGATTTGTTACCAACACACACTATGATTGAAGAAGTCTTTGGTGTGAGGCTTGGAT  
ACACAAGAGCCGAGATGTTTAG

>CcMYB120 |Locus\_ID=BC332\_11642 |CDS\_len=1758 |strand=-  
ATGATGGAGAAAAGGAAGTTCAAGAGAAGGGTCTTTGTTAGTGAACATGACATGTCCACTCTCTTACAAAGGTACACAGC  
AATGACAATGTTGACACTGTTGCAAGAGGTGGCACAAGTTAAGGAATCGAAAATCGATTGGAATGAATTGGTGAAGAAGA

CTACTACTGGGATTACCAATGCTAGAGAGTACCAGATGGTGTGGCGCCATTTGGCTTATCGCCAAGTATTGCTTGATAAA  
GTGGATGATGATGCTCAACCTCTGGATGATGATAGTGATCTAGAATCTGATTTGGAAGCTTTTCCTCCGGTAAGCAATGA  
GACTTCATTAGAGGCTGCAGCCTGTGTGAAGGTATTAGTTGCTTCTCGGGCTCCATGTGATACAAATATGTCAGATGGAA  
ATACAATTGAGGTTCCATTGACTATAAGCATGCCCAATAGGCAAACATCTGGAAGTCTGCAGAAAATTCACTCCATGGT  
ATTTACAGCATATGGGACAAAACCTTACAGTCCCGGTTACTGTGCAAATGCAGCCACTTCCTTCTGTACAGCTGCTGAGGG  
TTTGGACACCAGTGGACCAGGTACAGCCAGCTATAATTCTCGTCGAAGACGAAAACCTTGGTCTGCAGCTGAAGATAGGG  
AGCTCATTGCTGCAGTACAAAAGTGTGGTGAAGGGAAGTGGGCAAGTATATTGAAAGAGGACTTTAAGGGTGACAGAACA  
GCTTCACAACTTTATCAGAGGTGGTCAATTATTAAGGCGGAACATGGCCGGAATGCCTCACAACTGTGCGAGGCTCA  
GCTTGCAGCTCGTCATGCAATGTCCGTGGCTTTTGGGGATAATTTAAGAGCAGCTTGTCCAACCAGCACTAATGTTGGGC  
CAAATTCAAGTGGTGGACCTAGTAACCTCTCCCATTTTGTCTGCTGATATTGCATCAGGTGGTCCACAATCTAAGCAT  
CGGCAAGATTTAGTACCTTCAAAACCTATAGTCCCAAAAAATCCATTAGCAGAGCCTGCTATTAACCCAGATCCAATGGC  
CAAAGCTGCTGCTATGGCTGCAAGCTCCCCATTGCTGTCCATTCAAGTCTGCTGCCTCGCTGCAAAAGGCTGCACAAT  
CTAAAAAAGGCATCCATATCATGCCTGGAGGAAGTCTGCAGTCAAATCATCAGTGCCAAGTAGCTTTAGTGGTTTTGCCT  
AGTAATGTACATTTTCAATTCGAACTGGCCTGGTGTCCCGTCCCGCAGGCCTCTCTAATGCCTCACAGTCTGGAACCCAGCA  
ATTGCAGGCTCTAAGATCTGCATCACCTGCAGTTCAGCCTAGACCAGCGACTGTGCCATCCAGAACCAATACTGCATCTG  
TGGTTCCCAGTGCCCTACATCTTCTCCAGCAACCGCGTGTCTCGGAGTAAAATCTAAAGCCGAGTTATGCAAGAAAAT  
CAAAGTCTGTTCTGTCTAATGCAAGGAGTGAGAAAGCTGGAGTTATTCGAGCTGCTTCATTGGCGAATACCCCAACA  
GCAGGTCCAAAAAGGTCCAACCTTTGGTTTCAGGCAACCGGTTGACAGTGAAGGTTGAAGGTCCAGAAGTGGAGGAGAGA  
GTAAAGCTTCAAGAATTTGGATCCAAGAAAACTAATCCCAAGTCAAGAGTCTCCAGCAATAAGAATGAGAACTAAA  
ACAGAATTGGCAGCTGAAAACACTAGTGGTCAAGGTCCAGCACCTGTGACATGTAAGGTGGTGTCAAAGATAGTTGA

>CcMYB121 |Locus\_ID=BC332\_19144 |CDS\_len=402 |strand=-  
ATGGCAGATTGTGATCGATCAAGCACATCAGATAATGCCTCAGTAGTATCAGCTGAATTTGAGCAAAAGTTATTGAGTTC  
ACGTGAATCCACGATAGATCCACCCGAGTGACGGCATTAGAGACCACCAACAAAGAAACCTCTGAAGTTGAATTTTCAG  
AAGATGAAGAAATTTCTATTGCTAAAATGTTTAATTTGGTTCGGAGAGCGGTGGTCATTAATTGCTGGAAGAATCCCAGGA  
AGAAGTCTGATGAGATTGAAAAGTACTGGAATTTGAGAATATACTCCAAGAGCCAGGGCGAAAGTATGTCGGAGATACT  
ACTCAAATCGAAAGATCAATCTCAAACATTGCACTGAAAGAGGAATCTGGGCATTCAACGGAATGTTAAGGGGAAGT  
AG

>CcMYB15 |Locus\_ID=BC332\_12046 |CDS\_len=831 |strand=-  
ATGCAGCTACCCCTTCATTAGGATTTTCTTTTACTATTATACGGTGTCTACATCCACTTCTTCATCTTCAGAATCATC  
GTCATCTGAATCAACACCGCGTAATGATAACAAAGCAGAGAAGATAAAAGGACCATGGAGTGTGAAGAAGATAAGATAT  
TAACGAAACTTGTGTAACGTTACGGTGCACGTAAGTGGTCTTTGATAAGTAAATATATTAAAGGTAGGTCTGGCAAATCT  
TGCAGGCTTCGTTGGTGTAAATCAGTTAAGTCCCAACGTTGAACATCGACCATTTTCTCCATCTGAGGATGAGACCATACT  
AGCTGCTCATGCTAAATATGGCAATCGTTGGGCTACCATTGCACGTTTACTACCCGGTCGGACTGATAATGCAGTTAAAA  
ATCACTGGAATTCACGTTAAAAAGACGTTATCAACAATTGCTTCAGCAGCAAAATTCGGGTCAAATGGTTAACGGGTTG  
GAATTCGGTCCGGTCCAGGCTCCGGTCCGGTCTGGATCCGGTCCGGTATGGAGTATATGAATGTTGATGAGAGTCC  
AAAGGGGAATACTAACAATTATGCTACAACAATGACGACGATGGCTCAGTGTAAATATACAAGTGGGGTTTGGAGGAATA  
ATAATAACTATGGTGGCGGTGAATGTGATGATCCAATGACGACTTTGTCTTGGCACCACCGGGGATGGCCGGAGAAGAG  
ATGCCGGAGAGGAAAACGGAGAGTTTTCCGGCGGGATTTTGGGATGTAATGAGAGATGTGATTGCGAAAGAAGTGAGGGA  
ATATGTTGCTTCTACGGGGTTTCCTAATTAG

>CcMYB18 |Locus\_ID=BC332\_23339 |CDS\_len=1086 |strand=-  
ATGAGGGAGAGGCAACGGTGGCGATCTGAAGAGGATGCTTTATTGCGGGCATATGTTAGACAGTATGGACCAAAAGAATG  
GCACCTTGATCGCAGCGTATGAACACACCCCTCAACAGGGACGCTAAATCTTGTTTGGAAAGGTGGAAAAACTACCTGA  
AACCAGGGATTAAAAAAGGATCACTCACTGAAGAGGAGCAGCATCTTGTTATCCAACCTACAGGCCAAACACGGTAACAAA  
TGGAAGAAAATAGCAGCTGAAGTACCAGGTGCAACTGCTAAAAGATTAGGAAAGTGGTGGGAAGTATTCAAAGAGAAGCA  
ACAGAGAGAGCAAAAAGAAAACAATAAGGTTGTTGATCCAGTGGACGAGGGAAAATACGACCACATTCTTGAGACCTTTG  
CAGAGAAGATTGTAAAAGAGCGAAGTGTTCAGGTTTACTTATGGCTACTTCTAATGGAGGTTTCTCCACACTGATGCA  
CCAACCTTCTACGCCACAGACTCTTCTTCTCCGTGGCTTTCTAATTCCAGTGCTCCTTCAACTGTCCGATCGTCATCTCC  
ATCTGTGACTTTAAGTCTCTCCCATCAACAGTGCCACCTACTCTACGCCAGTATTCGGTGGCTACAGACAGATAGAG  
GACCTGAAAATGCGCCCTTATCTTGACCAGTTTTCCACATCATGGGGTTGCCCTCCTTGTGGAGAAAATCCATTTATT  
ACTGAACCTGCAGAATGCTGTAAGGAAGTAGATGAAGGGCATCGTAGTTGGACTGCACATAAGAAGGAAGCAGCTTGGAG  
GTTAAGGAGGGTGAATTACAAGTACAAGTGAAGGAAAGCAACAAAGTTAGGGAAAAGATGGAGGAAATCGAAGCAAAAA  
TGAAAGCTTTGAGGGAAGAGCAGAAGGCAACTTTAGACAGGATTGACGAGAATACAAGGACCAACTAGCAGGTTTGAAG  
AGGGATGCAGAAGCAAAGGAGCAGAAATTGGCTGAGCAATGGGCTCCAAACACCTACGCCTTGCTAAGTTTCTTGAGCA  
GATGGGATGCCAATCAAGACTTGCAAGAACCTAATGGTGGCCGCTGA

>CcMYB4 |Locus\_ID=BC332\_27825 |CDS\_len=1431 |strand=-  
ATGCAGAATGCTATGAAGAGAAGCGTTGAAGCTGCAAGACTAAAGAAAGACATATTGTTTCTTGGTCACAAGAGGAGGA  
TGATATACTAAGAGAGCAAATTCGAATCCATGGAACAGACAATTGGACGATCATCGCATCGAAGTTCAAGGATAAAACAA  
CAAGGCAATGTGCAAGAAGATGGTTCATTATTTGAAGTCTGATTTCAAGAAAGGAGGGTGGTACCTGAAGAAGATATA

CTTTTATGTGAGGCTCAAAAGATCTTTGGTAACAGATGGACTGAAATTGCAAAGGTGGTTTCAGGCAGGACCGATAACGC  
TGTGAAGAATCGGTTCACTACACTGTGCAAAAAGAGAGCAAAGCATGAGGCTTTGGCTAAAGAAAACAGCAATTCATACA  
TTAATCTGAATAACAAGAGGGTTATATTTCCAAGTGGCCTTAATATGGATAACATAACAGAAGCTACTGCTCCTATTTAAA  
AAGCTGAGGAGGAGTGACATTTTCAGATGTCCTTCAAATTGGTAACGAGGGAGAAAAATCTATGGGTGATTGTGGAACCTAC  
AAATCCATTACTAAGACATCCATTTGCAGTACTAGCTCAAACTTGCATAATGCTGGGGAAAACCTGGCATCTCATCAGC  
GGACTACTGGAAGTGGTAGTGACAACAACTCAAGGAACATTCCTTAAAAAAGATGATCCAAAGGTACACGTTTTGATG  
CAACAAGCAGAGCTGCTAAGCTCACTGGCTATGAAAGTGAACACAGAGAATACAGATCAAAGCCTTGAAAATGCGTGGAA  
GATACTCCAAGATTTTCTTCAACAAACAAAGGATGGTGATATGCTCAAGTTCAGCTCCCTGAGATGAATTTTGAACTG  
GTGATTATAAGAACCTGATAGCAGATTCAAGAAGTAGTAATGAAGGCACTCAACCATCTTGGAGGCAACCTGCTTTATCT  
GAAGATTCTGCTGGCAGTTCTGAGTATAGTACGGGATCAACTCTGCTATCCCATGCACTGGCTGATAAAACAGAAGAAAG  
TCAAGCTGAGGTGTGTCACATCATCAGGATATTGAATCTGAATTACGAACGCTCTCAGATGAGTGATCAAGCTGGGCTTC  
ATGAATTAGAAAAATGGAATCTCCTGCCGTGTATCCACCCTCGAGATACCTTTGCCAGTTTGTGATGAAGAAAAAGTTAAT  
AATGGACCTGCTACCGCTGAATGTGAATTTCTGAATACAGATTTTCAGTTCTCCTCATCAAGTAACCTCCACTGTTTCAGATC  
TTTAGCTGCAGAAATTTCCCACTCCAAAGTTTTTCAGAAAGTGAGAGACAGTTTCTATTGAAAAACCTTGGAGTGAGTCCA  
CATCCCTGTATCCAGGCACTAATCTTTCACAACCTCCATCGTGCAAAAGAGCCCTCCTCCATAGTCTATAA

>CcMYB58 |Locus\_ID=BC332\_32563 |CDS\_len=1068 |strand=+  
ATGGGGAGGCCTCCATGTTGTAATGATAAGGTGCGTAATAGAAAATGTAATTGGATAGAAGATGATTCAAACACATCTAC  
ATATGTCTCAAACAAGCATGGAATTGGTAATTGGGCAACCATGTCTAAGAAATCAGGATATGGGAGAAGTGGGAGGATTC  
AGAAGCAGCGATGGAGTAATCGTCTGAAACCTGATCTCAAGCAGGACAACCTTCACACCCCAAGAAGAGGAACCTGATCATT  
AAGCTTCATGCCACTATAGGTAGCAGGTGGTCTATAATAGCACACAACCTAGCTGGGAGAACAGACAATGATGTGAAAAA  
CTTGTTGGAACACTAAGCTGAAAAAGAAGCTATCTGCAATGGGGATTGATCCTGTTACTCACAAGCCTTTCTCCCAAATTC  
TCACTGACTATGGAACATAGGTGGCTTCCCGAAAGCCAGAACGCGTTTCGTGTCGCTTAACAGAGAGCTAAAGGGTGCA  
TTTATGTCTAGACCAGAACAACCTTCAACATTTCTTACAAAGTTTTCCAAACTTCCACAGCCTTTGTGTGAACTGCCAAA  
AACTGAAGCTTCAGAAGAATGTTTCTTCAGCAACAATCGAGATTCGAGCAATGTTAATCAGCCTCCGGTCGATCTGCTGT  
CCGAGTTACAAGCCATAAAATATGTAAGTGGGCTCAAATTACAACCTCCCAAGGCAATATTCTCACATCATCCAAAT  
CAGATGACTGATTGCTCTACTTCTTACCTTTGTCTCTGCTCTGTCATCATCAGCATCTCATTATTAAACGAAAATCA  
AGTCAACTGGTGTGATTATCTTCTTGACGATGCATTTATTCCATCGAATTTCAAAGATCAAGAAGACGAGTTAACCATTG  
AAGAAAAGCTAGTGAGTTCAGGAGCTCAAGATGGGTCAAACAACGTGCCATCAACAAGGGATTTTCAAGCCTCGTTATCT  
ACAAAGGTACATCATCATCGTCATCATCATTTGTTGAAGCCATGCTAGAATGTGAAAACGAAATGTTCTTGAACCTCCC  
TGGCCTCTCTGAGGATCCCTTTTACTAG

>CcMYB62 |Locus\_ID=BC332\_19189 |CDS\_len=564 |strand=+  
ATGAGATGTAGGAAGAGCTGCAGATTGAGATGGATGAATTACTTGAAGCCTGGCTTGAAGAAAGGGAATTACAGCCCTGA  
AGAAGAACTCATTCTTAAATTACACAAGGAACCTCGGAAACAAATGGTCAGCGATTGCTACAAGGTTACCAGGAAGATCGG  
ACAACGATGTCAAAAACCACTGGGATGCTCATCATAAGAAACGGATAAGATTAACAAATGCCAATTCATCCACATCAACG  
GAGAAATTTACTGAATCATCGTCGTCTGATTCTAAAAATGAACAATCTTGTAAACAGTGACGAAGCTGACTATGATATGAA  
AGAGGTGCCAATATCAAGTGATTTATCAATAAGTTAAATGGAGTAACAGACTGGATTGAAGAAGAAGATAACCCACCT  
TATTAGACAATGAAAAAATTTCAAGTATCAATTCAGTGAACAATCACTTCCAGATTCTCTTTGCTGGACAAGTCCTA  
TTGCCAATTTTCAGACAACTTTTGACACTAATTTTTGGTCCGAATCGCTACTCGACAATTTCTGGACACAACCTTTCTT  
CTAA

>CcADA1 |Locus\_ID=BC332\_14478 |CDS\_len=1365 |strand=+  
CAGGACATCTTAGCTTTCCCACTTATCTGCCCGGACTGGAATGCGGATGAAGAGATGTTGCTTCTTGAGGGAATTGAAAT  
GTATGGCATGGGTAAATTGGGCAGAAGTAGGTGAACATGTGCGAACAAGTCAAAGAAGCGTGTGTCGACCATTTTAAAG  
ACGCATACTTAGACTCACCTTACTTTCTCTACCGGATATGACTCACGTCATGGGGAAAAATAGAAAGGAACCTCTTGCC  
ATGGCCAAAGGGAATTTACAGATAAGAAAGGAGTATCCTCACTTGGTGAAGTTGTTCCGAAAGATGAATCATTTTCTCC  
GTCTCAAGTCAAAGTTGAAGACTCTCATAGAAAGGGTCTTTCAGGACGTTTATCTGCTGTATCCAATGCGGTCAATTAACA  
GCATGAATGCTTCAGGAATCACAGGCATTAACCAACCTCCAGCAAGTCGCAATCAAAAACCAAAATGAACCTGTAAAA  
TTGGAAGGCAGAAATTTTGGAGGCAAGAAACCAAAATCGTTGAAAGAGGATGGATCCTCATTGATGAACTAAGTGGATA  
TATCCCCAAAAGGGAAGAATTTGATCCTGAATATGATAATGATGCGGAGCAACTATTGGCTGATATGGAATTCAGGAAA  
CTGAAACTGAACAGGAGCGCAACTTAAGTTGCGTGTCTGCGTATCTATTCCAAGAGGCTTGATGAAAGAAAGCGCCGC  
AAGGATTTTATTCTAGAGAGGAATTTACTCCAGCCAAGTGAATTTGAGAAGAATTTGTACCAGAAGAGAAAGATCTATG  
CCGACGTTATGATGCCATTATGCGCTTCTCTCGAAGGAGGAGCATGAAGAATTAATGAAGACTGTGGTCTCGGAACATA  
GATATCTGAAAAGAATACAAGAACTCAAGGAATCGAGAGCTGCTGGTTGTCTTCTACTGAAGTTGATAGATACTTA  
GAAAGGAAAAGGAAGAAAGAACTTGAAGATGGTGTTCGAGAAAAGAAAGTTCTCAGATTGGCCAATGAGCCAGGAGAG  
CCTGAACATGCCTGCTTCTTCTGACTCACTTGAACACATTCAAATAGAAAACCTTGTAGCCAGGCGAATTTGAGTTCCA  
TCAACGATTCGGGGTTGAGCTCTTTCTGCAGGAGAAGTGTATCTGAACCTGAGAAACAACCTATGCCGAGAAATCAGG  
CTATCACCGCATCATTATCTTCGGATGCAAGAGGTTCTTACAATACAAATTTATAGTGGAATATCACTAGAAAATCAGA  
TGCTTATCCCTTGTTCAAATAGAAGCAACTAAAGTAGATAGAGTTTATGATATGCTTTTGAAGAAAGGAGTTTCAACCT  
TGTA

>CcADA2 |Locus\_ID=BC332\_18760 |CDS\_len=1686 |strand=-  
ATGGGTCGTTCTCGCCTGTTCTGTCATCCACCGATGATGATCCAACCCAGAGGTCTAAAAGAAAAAGGGCTGCACCAAA  
TGTGGAGAATTTTGATACTGCAGCTGCTGGCCAAATGTTGACCGAAGGGAAAAAGGCTTTGTACCATTGCAATTATTGCA  
ATAAAGACATATCTGGAAGGATTGCAATTAAATGTGCTGTGTGCTCTGACTTTGATCTTTGTGTGGAATGCTTTTCTGTC  
GGAGCAGAAGTGCAGCCTCACAAAAGTAATCATCTATATAGGGTTATGGATAACCTGTCATTTCTCTCATATGTGCTGA  
CTGGAATGCAGATGAGGAAATGTTACTTCTAGAGGGGTTGGAAATGTACGGATTGGCAAACCTGGGCTGAAGTTGCCGAAC  
ATGTTGGAACAAAAAGTAAATTGCAGTGTATTGAACACTATAAGTCCATATATATTAGTTCTCCTTGTTTTCCAATTCCG  
GACATGTCTCACGTTATGGGAAAGAGCAGAGAGGAACCTTCTTGCCATGGCCAAGGAGCAAGGATATGCTGCTCCCGGGGA  
AGTTAATGTTAAAGAAGAGTCTCCATTCTCTGCAAGAATCAAGATGGAAGATCAACGGGAAGAAAATTTCAGCTGGCCTTG  
CCTCAGTTGGAGGTTCTGCTTCTGGTAAATTAGCAGGCGCTGGAAAGAGGACATCTGCCGTGCTTAATAGTAAGGAGAAT  
CATGATAGCATCAAATTTGGAAGGTTGCTCTGCAGACAGGAGCGTTGGAGAGAAAAAGCCAAGGACATCGGTGGACGAGGG  
GCCTTCTATGACAGAATTGAGTGGTTATAATTCTAAGAGAGAGGAGTTTGAAATTGAATACGATAATGATGCTGAGCAGA  
TGCTGGCTGATATGGAATTTAAAGAGACAGATAGCAATGCTGAACGTGAACCTGAACTTCGTGTATTGCGTATATACTCT  
AAAAGGCTTGATGAGAGGAAACGTAGGAAGGATTTTATTTTGGAAAGAAAACCTACTTCATCCCGATCCTTTTGAGAAAGA  
CCTCACTCCGGAGGAGAAGGACATATGCCGTTCTACAGGGTATTTCATGCGTTTTAGTACAAAAGGGGAGCATGAGGATT  
TCCTTAGGAGCATAATCGAGGAGCACCGGATGGCAAAACGATACAAAATCTTCAGGATGCCCGAGCTGCTGGTTGTCGA  
ACTTCCGCTGAGGCAGAAAGATATATTGAACAAAAGAGAACACAGGAATCTGAAGAAAATATACGTAGACTAAAGGAGAA  
CTCCCAGAATGGCCCAAGTGGCAAATATTTGCAAAGAGCAGGTCACTTTAAAGTGGAGCATGACAGCAGCCCCAGTGGAG  
TTGTTAGAGGCCCTGAAATGCTGGATTCTTGTTGCAAGGACTTATCATCAACCACCGCACCACATGGTGTGGAAGTGCT  
TTAGACATTTGGGATGTCAGTGGCTTTTTAGGGGCTGAGTTACTCTCAGAACTGAAAAAAGCTTTGTGATGAGATCAG  
AATCCTCCCGAGTCATTATCTGAACATGTTACAGACCATGTCTATGGGGATCTTAAATGGCAACATCACCAAGAGATCTG  
ACGCGCATGGTCTATTCAATGTTGATCCGAATAAGGTGGACAAAGTGTATGAGATGCTTGTTAAAAGGGCCTGGCTCAA  
GCATAA

>CcARR1 |Locus\_ID=BC332\_14187 |CDS\_len=1992 |strand=+  
ATGAATCTTGTTGCTAGTTCTAGTGTCTTGGAAATCTAATAGTAATAATAGTGATAGAGTTGAAAAAATGAGTTTCC  
AGCAGGTTTAAGAGTACTTGTTGTTGATGATGATCCTACTTGTTAAGGATCTTGGAGCAGATGCTTAGGAATTGTCATT  
ATGAAGTCACCAAGTCCAATCGAGCGGAGATTGCCTTGTCATGCTCCGCGAGAACAGAAATGGTTTTGACATTGTTATT  
AGTGATGTCCACATGCCGGACATGGATGGTTTCAAACCTTCTGAGCATGTTGGTTTGGAAATGGACCTGCCTGTTATAAT  
GATGTCTGCGGATGACAGTAAGGATGTCGTTATGAAAGGTGTTACTCATGGTGCATGTGATTATCTGATCAAACCGGTGC  
GTATTGAGGCGTTGAAGAACATTTGGCAGCATGTGATTTCGTAAAAAGAAGCACGAGTGGAAAGGACAAAGATTTTGAACAA  
TCGACAAACGTGGAAGATGGAGATCAACATCAAAAACACCAGAAGACGTTGATTATTCATCTTCAGCTAATGAAGGCAA  
CTGGAAGGCTCAAAGAGAAGAAAGGAGGAGGAAGATGAACTGAAGAAAGGGATGATACATCCACATTAAAGAAGCCAC  
GTGTCGTTTTGGTCGGTGGAGCTTCATCAACAGTTTGTACAAGCTGTCAACCAACTTGGAATCGACAAGGCTGTTCCCAAG  
AAAATTTCTGAACTGATGAATGTTCCCGGACTAACAAGAGAAAACGTTGCCAGCCACCTTCAGAAATATCGGCTGTACCT  
CAGGAGGTTGAGCGGTGTATCACAGCATCAGAAATGGATTGAATGACTCGTTTATGGGACATCCGGAAGCAGCATACGGGA  
CAATGACTTCTTTTCACTGGGCTTGAGCTTCAAGCTTTAGCTGCCACTGGTCAACTTCCCGCACAAAGTCTTGCTACCTTC  
CAGGCGGCTGCATTAGGTAGGTCTGCGACAAAATCTGCCATATCTATGCCTCTCGTAGATCAAAGAAACCTTTTCAGCTT  
TGAAAATCCCAAGTTGAGATATCCCGAGGGACAGCAACAGTTAAATAATAGCAATAAGCAAATTAACCTTGCTTCATGGAA  
TCCCAACAACCATGGAACCGAAGCAGCTAGCAGATCTGCACCAAGTCTGCGAGTCCTTTGTGGCTATGAATATGCAAGGG  
AACGCCAGAATGCAACAAAATAATGCTCTACTAATGCATATGTCTCAACAACAACAAAAACAGCCGTCTAGGGGTCAAAT  
GCTAAATGAATCCAGTAACGGTCAAGTTTCTCGGCCTCCGTTGTCCATGCCACAACCTTTGTCTCAAAACGGGATACCTG  
CTGCAATCTTATCACGAAATGGCATCGTTGACAACGTACGAGGTCGGTATACAATCCAGTCTCCCAAGCATCTTCAATG  
GTAGATTTCTCGCTAAATCAAACACGAGTTGCAAAACAGTTTTCTCTTGTGAGTAGCAATTCGGGATGTCAACTCT  
GACATCTAAAAGATTGCTTCCGGAAGAGGTTAACTCTGATATTAAGAGTCCAGAGGATTCCTGTCTGGTTACGATATTT  
TTGAAGAACTGCATCAGCAAAAATCGCAGGATTGGGGTATACAAAATGTGCGATCAGCCTTCGGCGCCTCTGATCATTCA  
GGTATACCAGGAACTCTAGATGTCTACCGTCCATGTTAGTTCAACAAGGTATTTCTGCAATGAAGAAGAATGGACAAAA  
TGGGAATTCGCCTATGGGCGGACCGCAACTTAACTTATTTCCGGTGGAAATTTCTTACTGTAAAGCTGAACAACCTTC  
CTGATACGAGCTATCAAAGTAACTTTCTCTGGAGCAATTTGGACAAGATGATCTCATGAGTGCCATTTTGAAGCAGCAA  
GAAAGCGTCGGAGAAGTTGAAACTGAGTTTGGCTTTGATGGATATCCACCACTGGACAATCTTCTGTGTAA

>CcARR10 |Locus\_ID=BC332\_02543 |CDS\_len=2067 |strand=-  
ATGGAACGACTCAGCAGCAGTTGCTACAACGACGACGAAGAAGACAACGACGACATGGAGTACATGGGAGGAACTTTT  
GTTAGCCTTTGCTGTGAAAAGGCATGGTCTTAAGAACTGGGAATCTGTAGCTATGGAACCTCAATCCCGTATCTCTTTAC  
CCGTTTTATTGACCGCTCAAATTTGTAAGGATAAATACCATGACCTCCGCCGCCGCTTCATGAATAGCTATAACAATAAC  
AGTTATGATGAGAAGATTAACGACAGTTTTGATGAAGGAGTTGAGCTGGATGTTGATGGGAATGGAGATGTAACGATTCC  
TTGGATTGAGGAGCTGAGACAACTCCGTGTTGCTGAGCTTAAAAAGAGGTTCAACGCTACGATCTTTGATCCAGTCGT  
TGCAGTTGAAAGTGAACCAATGGAGGAAGAGAGGGAACGGAGTTTGAAGGAGAAGAGTTTAGACGATGGAAAGAGACCA  
GATCTGGAGGATGTAAGGAAGAGAGATCGCAAAACGACAAAAACAGCGGTGCCGATGTTAAACCGGAGGATTTCGACCGG  
AAAAGCGGTGTCGAGCGAGGAATCAGACCGGGAACCGGTCTTCAACGAGTCTAATTCAACGGAGAACAGAGAAACCG  
GTGTTAAAAACGAACCGGAACCGGTGAGATCGGTGAAGATAAACCGGTTGAGGAAGTTAAACCGGTTAGTGAAGCGGAT  
TCATATAACGATAGCAGTTCAGATAGACAGGAGAAGAAAGTCCGTCTGACTCAGGCGATTTACGCGATACAGTCAGCGA

GTCGAAGGAGGAGACAAAGGAAAACAGTGACGTGCAGAGCACGGCGACTTTAACGAAGAGAAAACGGCAGTGCAGCGGCG  
GCGATGGTGGTAGAAACGGCGGAGATGCGGCGGAGATGGCTTCTCCGGCCGTTGGAATTAAGGGGAGGTAACGGCGAAA  
TCAGAGCCGTTAATTGAGTTTTTAGATATTATCAGGTCGCATAAGCGCGGCTCTATGTTCAAACGCCGGCTAGACAGCCA  
GAAAGCGGACAAGTACAAGAGTATAATCCGACAACATATGGATCTTGAAACGGTTCAAGCTCGGATTGACGACGGATCCT  
ATTGCTCTTGCCCCGCCAAATTCTACTTGGACCTCCTACTCGTCTTCAACAATGCTATCGTCTACTTCCCCAAGTCTTCC  
TCAGAATCAACTGCAGCTAATGAACTCCGTAGCATTGTAATTGAAGAATTAAGAAAGACCAGAACCCAATCAAAGGATCA  
ATCACCCGGACCTAGACTCGCACCATTAAAGATCCAACCTCAAGCCCGAATTGGAGATATCCGATTCTTTGCTTGCAAAAC  
ACAAATCTACCGTTCCTATTGTAGTTTGTGCGCAAAAGGAGCTCCATTTAGCTAAAGCAGCAGGTTCTGGTAATAACAAA  
CCGGAACCAATGGTGATAGTAAACCTCCTTTGAATCCAAAGCCACCGATAAAGTCTTCTTGAATGAAGAAGAGAGTTT  
AATCAAGCTTGGGATGAAAGAAAAGCCAGTGACTGGGGCAAGAAGTATGAGGAGAAGCAGCAAAGGTCGTTCAAATAACA  
ATGCTTCACCATCCAACAACAACAACCAAGCAACAATCCCAAGCAAAACCAATAGCGGTGGGACAAAAAGGAAGAC  
GCGAAACAGAGAAGAAGAAGAATACTAAAAACGAGGAGCTGCAGCGGACTTCTTGAAGAGAATAAAGAAGACTTC  
TCCTACGAAAGGAACATTAATTGAGGCACTAAAAAATGATCCGACGGAGGATGTTGTTAGTGTTAAAGTTAGTAATAAAA  
AAGAGCAGCAAAAGAAAAAAGTTGATGATCGGAGAGAAGTTCCAGTAAGGCGTAGTGGTGGAGGTGGTGGCAGCGCAATC  
AAGGAAGAAGGTAGTCCGTCTAAAAGGAGCGTAGGTGACCACCAAAGAGAGGTGGTAGAGAAGTAGTAGTGCAGGAAAA  
GCGTGGAAGGGAAAATAGTGAAAAGGATGATTCCTCTAACCGCCAAAGAAACGATCAAGGAGGTAA

>CcARR11 |Locus\_ID=BC332\_21691 |CDS\_len=1953 |strand=-

ATGGCTTCCAAGAGCAGTGTCCGTCTTATTTTCATATTTCAGAAGAGATTATAAATGGTGAACCAATCTATATTTCTCGAA  
CTGCTGCCCTATAAAAGCCAACAATATGAGCCTGCTGGGCTTGCTTTTACTCTGCTGCTCTTAGACTGCTTGGGCATG  
TTGAGAAAGAAGACCCTGAGGATGGTAAAGAAGATGTTCTAATGACAAGGAACAGCCATTTATGTATTCGTGAGAATCA  
TACAGCTCTAAGGGTAAAAAGAAATCTTCTACTGGGGAAAAGATACAAGATCATTATGCTTTGTTAGGGTTGAGTCACCT  
AAGGTATCTTGCTTCTGAGGATCAGATAAGGAAGAGCTATCGTGATGCTGCATTAAGGCATCATCTGACAAGCTAGCTT  
CTCTTCTTAGCCGAGGAACTGAAGCTGCAAAACAAGCTAAGAAGGAGGAAATAGAAAACCACTTCAAAGCTATTGAG  
GAAGCATATGAGGTCCTTATTGACCCTGTTAGAAGAAGGATTTATGATTCCACAGATGAATTTGATGATGAAATCCCGAC  
TGAATGTGCTCCACAAGATTTTTTTAAGGTCTTTGGACCTGCATTTTTAAGGAATGGTCGTTGGTCTGTCACCCAACCTC  
TTCCTTCATTAGGTGATGAGAATACTCCAATTAAGAAGTGGATAGCTTTTATAATTTCTGGTACAGCTTCAAAGCTGG  
AGAGAGTTCCACATGCTGATGAGTTTGACCTTGAACAAGCTGAGTCTCGTGATCACAAGAGGTGGATGGAAAGGCAGAA  
TGCAAACTGTGAGAGAAGGCCAGAAAGGAAGAATCTGCTAGGATTCGTACACTTGTGACAATGCGTATAGAAGAGACC  
CTAGAATCTTGGGAAGAAAAGAGGCGGAGAAAGCAGAAAAGCAGAGAAAGAAGGAAGCGAAAAATCTGGCGAAGAAATTA  
CAAGAGGAAGAAGCAGCTAGGATAGTGGAAGAGGAAAAGCGTAAGAAAGAGGAGGAAGAAAAAAGCTGCCGAGGTTGC  
TTCACAGCAGAAGAAGTTGAAGGAGAAGGAAAAGAAATTATTGCGAAAAGAGCGGAGTCGTTTGAGAACCTCGCAGCTC  
CTGTTTTGTCCCAGCATTTGCTTGGTCTGACTGATGATGATGTAGAGGGTGTATGTATGTCACTTGACATTGAGCAGATG  
AGGAACTTATGTGATAAACTGGATGGAAAGGGTGAGCTTGTGAAAGCTGAACCTTCTCAGGGAGGCACTTGACAGAAACA  
CAACTCGAAATATGAGAATAAAGATGAAAATAGTAAGTCGCAGCAAAATGGTTCTCTGGAGGATAAAATACAAGTTTCTT  
TGATGAGCAGTGAGAAAAGGGAGAAACCTTGGAGCAAAGAAGAAGTTGATCTTCTGAGAAAGGGGTGCTGAAATATCCT  
AAAGGAACCTCGCGAAGATGGGAAGTTATTTCCGAATATATTGGTACTGCAAGGACAGTTGAAGAGATCCTGAAGGCTAC  
GAAAACGGTCTGCTCCAGAAGCCTGACTCTGCCAAAGCCTTTGACTCCTTCTCGAGAAAAGAAAGCCAGCACCGACTA  
TTGCCCTCCTCTTTCCACGAGGGCTGAAGTAGAGGGGGTAGATAACAGTAGCAAACCTGAAAGTGGAAGTGCTAAATTA  
GCCAATTCTCAAGAGTCCCTTAGTCAAAACACAACAGCCAAAAAAGCTGAGGATGCGCCTGCAGCAAACGGGGTCTCCTC  
GAGTTCAGATTCAGACATATGGTCTGCTGTTCAAGAAAAAGCTTTAGTTCAAGCTCTGAAAACCTTCCCAAAGGAAACCA  
GCCAGCGGTGGGAACGAGTTGCAACTGCAGTCCCCGGGAAAACAGTGAACCAGTGTAAGAAAGAAGTTTGCATTACTCAAG  
GAGAACTTCAGGAACAAGAAAAGTGCAGTGTGA

>CcARR12 |Locus\_ID=BC332\_02846 |CDS\_len=3426 |strand=+

ATGGCTCCAGCAAAAAAGTCCAAAAGCATAAACAAGCGATTATCTCCTACAACCTGAAATCTCTCCAGTAAAGATGGCAA  
TGGGGACAACGGAAAGAAAAGCTTGCAACGGAAGCGGAAATTGTCTGACATGCTTGGTCTCAGTGGAGTGAGGAAGACC  
TGACACGCTTCTATCAAGCATACCGCAAGTATGGTAAAGATTGGAAGAAAGGTTGCATCTACAGTGAAATTCGAACTGCA  
GAAATGGTGGAGGCTCTTTACACAATGAATAGGGCTTATTTATCTCTTCCAGAGGGGACTGCGTCTGTGGCTGGGCTGAT  
TGCCATGATGACTGATCACTACTGCAACTTGGCAGCAAGCGACAGTGAGCAAGAGAGTAATGAGGACGCTGGAACGTCTC  
GAAAACCTCAGAAACGTGCATGGGGTAAAGTTTCATCCTAATATATCTAAAACATCTGAGATGACATCTTCAGCATTAGCT  
GCTAGCCATGGTTGTTTAACTTTGTTGAAGAAGAAGCGTTCAGGAGGAAGCCGTCCTCGAGCTGTTGGAAGCAACCC  
ACGATTTCTGTTTCTTTTCTTATGAAAATCCCAAGGGTGAGAAGTATTTTTCTCCTAGTGGACAGAGTTTGAAAGTGC  
AGCCACATGACACCGATGATGATGTGAAGATAGCGTTAGTTTTAACAGAAGCTTCACAAAGAGGTGGTTCTCCTCAGTTC  
TCTAAGACACCAAGCCGTTGGACGGATGGTGCTATGTTCTCACCTATTGGGACTGCTGAAAGAAAGCGTGTTAAAGTGGA  
TATGGGCAACGCCAAGCTTCTTAGTAATGAAGTGATGAAGAAGAGGGAAGCATGGAAGCAGACACTGGTGAGCTGATGC  
GGTATAAGAATGATTTTGAGGAAGCTGAAACCGTTGGTGAACAACACAGAAGCAAAAAAGAGCATATGGTAAAAAGTTG  
GAAGTTGATGATAGTGGTGAAGATCATTTTGTATGATATCAAAGAGGCATGTAGTGGTACAGAAGAAGGTCAAAGATTGGG  
TGCGGCGAGGGGTAACTTGAAATGGAGGCCACAGATGAAAAGAATGCAAGGGCCTCGTTACAAGGCCCTAGAAAGAGGA  
GCAAAAAGGTTCTTTTCGGGCGAGATGAAAGCTCTTCTTTTGTATGCCTTACAAACTTTGGCTGATTTGTCTCTAATGATG  
CCAGCAGCTGAAAATGAAGATGAGTCAATGATGCAGGTAAAGGATGAAATTGATGACCATTTTCGATGAATCTGGCTCCTT  
GGAAGCCGTTCCAGCACACAAACAAGAGACAAACGTGGATCGGCGGGGGTTAAATCGAGATGGAGTCAATCTTTATCAA

AGTTTGAAGTTACTTCCAGTAGGACATCAAAGCATGGGAAAGTTACATCTTCTGATGTTAATGCTGTTCTGAAACAAAG  
CAGGCAAGGAGGGCACAGAAAGCAATGTCATCTAAGGCTCGCAAAGCTGAAGGTCATGTTGACTATGATGTTACTGAATC  
TCAGGAAGCTGCGGTAAAAGACGCATCAAAAAAGTCCACCAGTAAGGGTAAAAGATCCTATCAGTGTGTGTCGCCTAAAT  
TAATTAAAGATCAGGAGCATTTCATCATGTGCAGATCCAAGAACAGAACGAAGTGATTACAGCTCAATCAACTGCACAAATC  
CCTGTGCGAAAACCAGGTGAACCTTGCCCTACTAAAGTTAGAAGCCGGCGTAAGATGGACCTGAAAAACCTCAAAAAACAAA  
AGATTTGAAGATTCCTGATAAAAGTTTGGATGATACTAGTGCATCCTTCACTGCCCTTCGTGACAAAGCATTACAGTCTTA  
AGAAAAAGATTTCCAGTTGCCTTTCCAACCATCAGGTACGAAGATGGTGCATGTATGAGTGGTTCTACAGCGCAATTGAC  
TACCCTTGGTTTGCTAAAAGGGAATTTGTGGAGTACCTGTATCATGTTGGATTAGGGCATGTTCCAAGGTTAACTCGTGT  
TGAATGGGGCGTCATAAGAAGTTCTCTTGGAAAACACGACGATTCTCTGAGCAATTCTTGAATGAAGAAAAGGAGAAGC  
TTAATCAATACCGGAATCTGTTAGATCACATTATACTGAACCTTCGTGAAGGTACCAGGAAGGGTTACCCACAGATCTT  
GCAAGGCCTTTGTGCGTTGGGCAACTTGTGATTGCGATCCATCCAAAAACAAGAGAGATACATGATGGAATGTGTTAAC  
AGTTGATCACTCTAGATGCCGTGTTAGTTTGACCGACAGAGCTTGGGGTTGAATTTGTCATGGACATTGATTGCATGC  
CTCTAAATCCATTTGAAAACATGCCACGCTACTTACAAGGCATGCAGATGCTGTTGATAAGTTTTTCAGAGCTTCAAT  
GAGCTCAAGATGAATGCACGAGCAAATGAGTTTATGAAATTTCCGGCTGGTGACAGCACGGAGAATGGAGATGTCTCCTC  
TCATTTCTCCCCACCAAGTCTCCCGTCAGTAATCTCTAAAGCAGACGAAGGTGGCTTCAGCAGAAGCTGATATGCAAT  
CTAAATCTGGAGTCATGGAACACCCTATATCAACAGATAGCATATTCGAAGCCTTCTACTGTCGCTCAGATTCAAGCA  
AAGGAAGCTGATGTACAAGCTCTTGACAGAGTTGACCCGTGCACTAGACAAAAAGGATGCAGTGGTTTTGGAGTTGAGTCT  
CATGAATGATGATGTTTTGGAACCAAAAGAGTGATGACTGTTTTCTCAAGGACTCGGAGCCTTTCAAGAAGCAATATG  
CTGCCGTGCTAATACAGTTAAATGAAGTCAATGAGCAGGTTTTCTTCTGCTTTATATCGTTTGAGACAGCGGAATACCTAT  
CATGGAAGCATTCCACTTGCATGGCAAAGGCCAGTTCCAAATTTTGTGATCCCAGTATTTTGAGCACTTTTGATCGTTG  
TATGAGTCAACCGCAGGAATCAGGGTTCCTTGTCAACGAGATAATAGAAAGCTCAAAAATCAAATCTTGGACTATGGTTG  
ATGCAGCGGTGCAGGCGATGCTTTTATATACTGGTAGAGACAACACCACCGAGAAGATTGAGGAGGCTATTGATTATGTG  
AATGATCGGATTCCACTAGATGATTCTTGCATGCCAATTCACCTGATCTTAAGTCAAAGAATGTGTGAGATAGAAGAAA  
TGAAGCAGAAATTCCTTCGGAACCTATCACCAAATGCGTTGCTACTTTGCTTATGATTGAGAAATGTACAGAACGACAGT  
TTCCACCAGCTGATATGGCAAAGTACTGGATTCTGCTGTAGCAAGTTTACAGCCCTGTTGCTCACAAAACCTTTCCAGTC  
TATGCTGAAATACAGAAGTGCATGGGAATCATCAGAAACCAATTATGGCATTAAATACCGACGTAG

>CcARR13 |Locus\_ID=BC332\_24051 |CDS\_len=5760 |strand=-

ATGCATGGATGTGGTGCGGAATCTGATCCTATAGTCGATTCCGAGGCTGATTCCATGGGAGTTGGTATTGGTAACAAAAC  
CTCTCCGCAGAGATCAACAATCGAGGAGGTTCAAATGAGCTTAGGCAGGGTTATGGTTTTCTAGAGATAAAGAGAAGAG  
AATTAGAATTTCTTGAGAAAGGTGGTGATCCACTGGATTTTCATATTAGGGAATGCTACTTCAGTTAGTGTTCAATCCACT  
TCTCTTACAGATCAACATCAAGATCAGCTTGTGACCAGTGAAGCAAAAGGTAGTTTTGCAATTACTGCTTCACCTCATGG  
AGACTCAGTTGAAAGTAGTGGTCGACTTGGGGCTCCTCAACTTTGTGAACCCAACAGTGCTGACAATCTCATGCTATTTG  
ATGGTGAAAATGAATTCATTGAAGCTGAAAGGTCCTGTAGATACCCAGCAGGAGCAACATTACTCCATCAGAGCAGTCA  
TCTAAGTTGGATAGAAGTCGAAATGCAAAGAATTGGGCGATTCTGCTGCTTTTGGCGTCCCTAAAAAATCTTACAAGCG  
AAGATACAGGCCCCGCCCTAATGGGGATGGCACTAGATCAAGTTCCACTGATATAATTCTAGGTCCTGGTGGTCATGGCA  
CATCTTTGCCCTCACAACATTTTTCTAAAGATGTAAAAGCACAGGTTTCTGATGGAGAAAATCCAAAAGACCAGAGCTCT  
TCTTTGAGCATTGCACGGCCTTCCATTCCAAATGGTTTTGTGCTGTGAAAACCTCCGCCATCTGATAATCTGCTAGATAC  
TGAAATACATGGCTTTAAAGTTGCAGAGGCACTACTTACTTGAAGAATGAGGATCTGGCATATAGCATCCCTGAAGCTA  
GTGCTTCAGATGTTTGTGGATAACCAACATGATCAGAACTCACTCGCTGATATCGAGGATGTGTCTATTACAGGAAAGT  
CCTGAAAGGCCTCAATCATCACTGGGGAAAGAAGGGGTAGGTTCTGCTGGACAGGAAGGTCGGTTGTGTACAACCTGCAGT  
AGGGCTTGAGAATCAAGCTAGTTCTAGCCATCATATAAATGGGAGTTGTGGGAAGAGTGACCAGAAAAGCATGCCAAATG  
ATGCTCAAAGCAGTGGTGAGCATTGGGCACAAAAGGTTTAGATTAGAATCTTCTTGAGTGGGCGGCGGTAGTCTGAAT  
CGAAATACCAATATGCGATGTCTAACAACTCAACGAATCTAGACTCCAATGGTGACTTGAAGGAACCAACTGTGCGTGCC  
AGAGGCAACGCAAGTTATAGAAAGCAATCTTAAAGAACAGAAAGAGGTGAAAACCTGATGACAGTTGTGGTTTCACTAATA  
AGGGTGAGGTAAGATAAAAATTACCACCCAAGTGGAAGCAGTTGAGCCATCTCCATCAGAAAACCTGAGAGGAAACCCACT  
ACGAACATAAGTGATAGTTCCAACCTCCAAAAATTATATTCTTCTATTATTGGGCGTCAAGGTTCAATCGAGTGAGAAT  
ACCTGTGCCATCCCAGCATGTATCACCACATGGAGTCTTAACCTCTTCCCTGAGGCACAAGCACCTGCGATCAATGTTA  
AACTTGCCACCAGGGGTGATGAAGACTCAATCTTGAAAGAGGCACAGATTATAGAGGCGAAACGTAAACGAATTAACGAG  
TTATCTGCTGTGGCCTTTCCACTGAAGAATCATCGGAAGTCTCACTGGGATTATGTACTTGAGGAAATGGTTTGGCTCGC  
AAATGATTTTGGCAGGAACGCCTTTGGAGAATGACTGCAGCGGCTCAATTGTGCCGTCAAGTTGCTTTTACCGCACGGT  
TACGATTCCAAGAACAAAATAGTAGTTGCAAGCTAAAAAGGTAGCTCATATTATGGCCAAAGCCGTTATGGGTTTCTGG  
CAGTCGATCGAGGGGAAAAACGAACAACCTGGAGCTACCAGTTACTAGAAAGGATCATGCTATTGCTATCAGGGAATATGC  
CATGAGATTTCTGAAATACAATGACTCTGATGTTGACAAAGCCTCGCTGAAGCTCCGGTGACTCCAGAGAGGGTGTCTG  
GTGGTGGAATTGTGGATGCGCCTCGGGAAGATCATTTGGGAGAAGAGAACCTCTTCTATGCTGTCTCATTTGGAGCAATG  
GATGCCTACCGGAAGTCTATAGAATCTCATGCGCTGCTCTGTGTGAAAATTGGCGGGAGCATGCATGAAGAGGTGGAGAC  
ATCGGCATGCGATACAATTCCAGAGTTTGGAGCTCAAGACTATGCATTTGAAGAGGATGAAGGAGAGTCAAGTCCATATG  
ATACGTCAGTTGCCATTGAAGGTAACAAATCATCAAAATTTTCCAGAAGCAAAGGAAGATCCACATAAAGGCGTATAGT  
GGAAGACCATATGATGTTGCACTGATGTACCATTTACACGTGTGGAATACAAATTTGGTACTCAGCAATCTATGCAACT  
GGGAAAAAGGCCATCTAGCAATCTTAATGCGTCTATTCCGACAAAGCGTATGCGTTCTGCTTCTAGGCAAAGAGTTGTCA  
GTCCTTACAGTGCAACAACATCTGGATGTGCTCAGTTGCCAGTCAAAACTGATGCTTCAAGTGGTGATACCAGTTTCATTT  
CAGGATGACCAGAGTACGTTGCATGGGGGATCATTTATGCCAAATAGTTTGAAGTTGAGTCTGTGGGAAATTTCAAGAA

GCATTTACCATTTGATTCCGCTGAAGTTTCAAACCTAAAAAGAAGAAAAAGTGAAGATTCTGGGTTCCGCATATGAAC  
AACGATGGCAGGTTGATTCTAATTTTCAAACGAGCAGAGGGATCCCTCCAGAAAGAGATTGGAGAGCCATCAACTTGAT  
TCTAATGGTCATAATGGTTTATTTGGTCAACATGTTGCAAAGAAGCCAAAGATGATGAGACAATCAATTGAAAAATCTTT  
TGAAAATGTTGGCTCTGTTGGTGGATTGTCCCATCTCCAGCGGCTTCCAGATGAGTAACATGTCCAACCCAAACAAA  
TTATGAAAATGCTTAGTGGTAGGGATCAGGGTAGGAGAGCCAAAACCTTTTAAGATGTCTGCAGGACAAGCAAGTTCAGGA  
AGTCCATGGTCACTATTCGAGGACCAGGCACTCGTTGTCTGGTGCATGATATGGGTCCAAATTGGGAGCTTGTAAGTGA  
TGCTTTCAACAGTACTTTACAATTCAAGTGTATCTACCGCAAGCCAAAGGACTGCAAAGAACGACATAAAATGCTTATGG  
ACAGAAGTGGTGATGGTAATGATAGTGTGATGATTGAGGATCATCTCAACCCTATCCTTCAACGTTACCTGGCATTCCC  
AAGGGAAGTGCCAGGCAACTGTTTCAGCGCTTACAGGGGCCAATGGAAGAGGATACACTTAGATCCCATTTTGAGAAAAT  
GATCTTGATCGGGCAGAAATATCTTTACGAAAGAATCAGGGTTATAAATTTGATTGAGACAAATCCAGCAACCACATG  
ATTCTCACACACATGCTCTTTCCCAACTTTATCCAAATAATCTGAACGGAGGCCCTATTCTTACACCTTTGGACCTATGG  
GATGCACCCTCGCCTAGTCCAGACTATCCTTCTGTTGGATGCCAAGGTCACGCCCAAGCGGATTATCTGTTTCAAGTCA  
TGCATTGAATTCAGTGCTCCCGGTATCTGGTGCAAACCTCCACAGTTCAGCTTCCAGTATGATTGGTGAAAGCAACC  
TTCCATCATCAAGTCCCCTCAATGCATCTGTTAGGGATGCTAGATATGTTGTTTCTAGACCTGCATCCCTTCCAGTTGAT  
GATCAGCGATTGCAGCACTACAATCAAATGAGAAATATGCAATCCAATATGTCTGCTCCTGGAGTTCCTGCAGCCACTAA  
TCGTGCTGGTGTTCGTACGCTTTCCAGTGGCAACAGCACATGCATAATGGGTGGGATTAATAGAGGTATTCGGATGGCAA  
GGCCTGGTTTTCCAGGGAGTTGCATCACCGTCTATGTTGAATTCGGAAGCATGCTTTCCTCTGGGATGGTAGCATTGTCA  
AACACTCTGAATATTCATTCTGGAGTGAGATCTAATCAGGTGAATTCATGATGAGACCTCGTGATGGTTCGCTCATGAC  
ACAGCCACCACAGAATCAGGAAGCTCAGAGGCCAATGATGGTTCCTGAGCATCAGCTGCAGGCTTCTCAGGGAAACAGCC  
AAGTGGTTCCTCCATTTGGTGGGTTAAGTTCCTCTTTACCCAACCAAGTCTGCCTCTCCCGTCACACCATATCCACTTCAT  
CTTCAGCAATCACATCCTATGTCTTCACAGCAGCCACTTATGCTTAGCCCTCATCACCTCATCTTCAAGGGGCTAATCA  
TGCCACCAACTCACAGCAACAAGCTTATGCGTTTTGATTAGCTAAAGAGAGGCACCTGCAACACCGACTGTTACAACAGC  
AACATTTTTTACATTACAGCCCCAACATCCTATTTTCTCTTTGCAAAATAGTCCCAAGACCACATCACAATCTTCT  
GCTCCACCAAGTATCAGTGACATCCCCACCTCAGTGACCCCAATATCTCGACCTCATGCATTGCCAGCTCATGGGCATGC  
ATGGACTGCTCAAACGCGGGCAGCAGTCTAACTACTCAGATGAGTAAGCAAAGACCACGTGAGACAGGGGGACAGCAGC  
TTCAACCAGCAGGCAAGCACCAGCCTCCACAGCGGCAGCAGTACAATCACAACAAGAAGCTAAATTATTGAATGGAGTC  
GGCAGAGGGAACATGATGATGCACCAGAAGTTCAGATAGATCCCTCTCTAATGAATGGGTTTTCTAACAATAAGGCGAA  
TCAATCTGCTTGAAAGGTGTGCATGCTACTAGCTTGATGCAAGGCCATGGACTATATTCTGGATCAGCAAACAGCCCTG  
CCCATCTTGTAACAAGCTATGGAACCTCATTCTTCAAGTCCACAGCAGCCGAGTCTAAAAGTTACTCTGGCCGACTA  
CCTCTATCTACTAAGCATCTTACAGCAGGAGATGCCTTGTAATCCGGATAATAGCAATCAAAGTCTGCTTCTTTGGATGC  
CTCTGATACTAATTCATCTCAGCTATCTGTTCCATCCTCAGTCGTGGGTTCTTCCAACCACCACGAATTAGTGCATCAAC  
AGGCACAGTGGCAGCCACAGCCAAAATTGTTGAATCAAAGGAAGCAACTGTACAGCGAGTTTTGCAGCAGAACCATGTA  
GTAAATTCAAATCCATCAAAGAGGTTGCAAGCTGATGAATTTCAAGCTGAACAACGATCTACGTGCAAAACTTCTAAGAT  
AGGTGCAATCACCTCAATGCCTCAGGATTGCAACAATCCAACACTGTCTCAGGTGTTTACCTTTGAGTGCTAATCAGT  
GGAAGGGTGCAGAACCATTATTTGATTCAATTGGGGCTCCCCAACAAGTTCTGCTGGCAGTAAGCCAGTTCTCAAGTC  
AGCCGAGGGGTAAAGCAAAGACAACCTTCAGGCAACTCATCTCCAACAGGGCCTGATTTTAGTGTAAGTGGCAGCAAAA  
ATCCTCCAGTTGCAGCCTCCTTCTCAGTGACCCAGCCACAGTTGCAGCAGCAACAGCAGCAGCTGTACCATCGCAAC  
ATTCACAACAACAGGTCAGGTTCTGCAAGCAGGGAATAGCAGTTTGTGTTGCTAGGCCAATGACTGTAGACTGGATTGA

>CcARR2 |Locus\_ID=BC332\_02094 |CDS\_len=2013 |strand=+

ATGAATATTGGTAGTGGGTCAATTGGTTACTGTTCCAAGTTCTACCGGTTCTTGGAAGTCCGGTGATGTAGTTTCCGATCA  
GTTTCCGGTGGGGCTCCGGTACTTGTAGTTGATGATGATCCGACCTGTTTAAGGATCTTGAGAAGATGCTCAGGAAGT  
GTCATATGAAGTTACCAAGTGTAATAGGGCTGAGATTGCATATCATTTCTCCGGGAAAACAAGAATGGGTTTGACATT  
GTTATAAGTGATGTCCACATGCCAGACATGGATGGTTTTCAAATCTTTGAGCAGATTGGTCTGGAGATGGACCTGCCTGT  
TATAATGATGTACGCGGATGATAGTAAGGATGTGGTTATGAAAGGGGTTACTCATGGTGCATATGATTATCTAATCAAC  
CGGTGCGGATTGAGGCACTAAAGAATATTTGGCAGCATGTTGTTGCTGAAAAGGAAATATGAGTGGAAGGACAACAATTTT  
GATCAATCGGGAAGTGGAAGAGGGAGATCGGCAGCAGAAACCATCAGAAGATGTTGATTACTCATCTTCAGCTAATGA  
AGGAAACTGGAAAACTCCAAGAAAAGAAAGGAAGAGGAAGAAGAAGTTGAAGATAGGGATGATACATCCAATCTAAAGA  
AGCCACGTGTCGTTTGGTCTGTGGAGCTTCATCAACAATTTGTACAAGCTGTGCATCAACTTGGAATTGACAAGGCTGTT  
CCCAAGAAAATCTTGAACTGATGAACGTTCTGGACTTACCAGAGAAAATGTTGCTAGCCATCTTCAGAAATATAGGTT  
GTATCTCAGAAGTTGAGTGGTGTATCGCAGCACCAGAATGGATTGAACAACCTTTTCATGGGACGCCAGACGCAACCT  
TTTGACAATATCTTCCCTTAATGGACTTGATCTTCAAGCTCTTGCTGCTGCTGGTCAAATCCCTGCACAAAATCTTGCT  
ACCCTCCAAGCAGCGGCCCTAGGTAAATCTGCTACAAAATCTGCCATTTCTATGCCCTAGATCAAAGAACTTTTTTCAG  
CTTCGAAAATTCGAAGTTGAGATTTCCAGAAGGGCAGCAACAACCTGAATAATAGCAATAAGCAAATCGACTTGCTGCATG  
GAATTCACACCACCATGGAATCGAAGCAACTTGCAAATTTGCACCACCCTTCCAGTCCTTCTGGGTATGAATATGCAA  
GTGAACCTCACATCACAACACAATAATTCTGTGCTTATGCGATTGTCCAGTCACAACCTAGGACTCAACTGCTCAATGG  
AGCGAATAATGGTAGTCAAGTTTCAAGGCTTCCGTTGTCCATGCAGCAATCTTTGTCCCGGTCTTAACACAAAGTGGTA  
TTGTGACAATGCACGAGGGAGTGTGTACAATCCAGTCTCTCAAGCATCATCAATGGTAGATTTCTCGGTAAATCAAAGC  
AAGGAGTTGCAAAGCTACAACTTTTCTTTGGGAGTAATAGTTTGGGGATGTCTTCTTTGACTAATCGAGGGATGCTTCA  
GGAAGAGGTGAATTCTGACATCAAAGGATCTAGAGGTTTCCCTTCTAATTATGATATTTTCAATGAACCTCCAGCCAAAAT  
CGCAGAACTGGGGTTTACAGAATGATGGTTCAACCTTTGACACGTCTCTTCATCCATGTATGCAAGGAACCTCAGGATGTC  
TCATCACAACCTGTTACTTCAACAGGGAATTTCTTCAACTCATAACAGTGGACAAAACAGAAATGCTCCAATTGAGAAACC

AATGTATTCCAACGGGGATGAGATTGGACATTCTAATACTATGTGTGGCTCACAACCTTAACCTCTGGTGGTGGGAATATGC  
TTGCTGTTAAAGCTGAAAGATTTCTGACGCAGACTATCAGAATACCAATATCCGGGAGCAATTTGGACGTGATGACCTC  
ATGAGTGC GTTCTTAGACAGCAAGCAAGTGTTGGACCTGTTGAAACTGAATTTGGCTTCGATGGATACACATTGGACAA  
TCTTCCTGTTTAA

>CcARR3 |Locus\_ID=BC332\_31526 |CDS\_len=1707 |strand=-  
ATGGCTACTTCCGGTGAATGTTTGAACCTCCGGTGGATTTTCCGGTGAGTTTCCGACGTTCCGGTTGCTGGTGGTAGATGA  
TGATCCTTCTTGTTTAAGAGTATTGGAATGCATGCTTAAGAAGTGTCACTATGAAGTCACCACGTGTGAGCACGCAGAGG  
TTGCATTGTCATTGCTCCGCGAAAACAGAAACAACCTTTCACCTTGATTATAAGCGATGTGCACATGCCAGACATGGACGGA  
TTTAAACTTGTGCGAGCTCATTGTACTGGAGATGAACCTCCCTGTTATAATGATGTCCGTGGATGACAGTAGAAGTGTAAT  
TATGAAAGCCGTGATTATGGCGCACATGACTATCTGGTTAAACCGGTGAGCATTGAAGCGCTAAAGAACATTTGGCAGC  
ATGTTTTCGACAGAATAAGGACGAGTGGAAGGGGAAGATTTTGGATCGATTAGGAAATGTTGAAGGTGCTGAGTACTCG  
GATGCAGCTAAAGAAGGGAGGCTGAAAAGCTCGAAGAAGAGAAACGACAAGGAGGAAAATGAAATCGGAGAAAGGAATGA  
TACGAATACAGTGAAGAAGGCGCGTGTACTTTGGTACCAGGAACCTTCATGAGAAGTTTCATACAAGCTATCAATCAACTCG  
GAGGGGACAGCAAGATTCCCAGAAAATTCTGAAACTGATGAATGTTTCGGGGCTAGAAAGAGAACACGTTGCTAGCCAC  
CTTCAGAAATACCGACTGCAACTACAGAAGAATCGGAGTGGACTGGAGAGTGGTTTCATGGGACATTCGGAAGTAACCAT  
TGGGACACTGCTCAACAATCCTGATGTTCAAACCTCTCGCACCTATGGATCAACATCCTGTTCAAAATCTTACTACCCACC  
AGGGGCCGACGTGGGTTAGGCCGAAATCTCCCATATTTATCAAAGAGCCGACATGGGGTAGCCCTACAACAAAATCTCCC  
ATATTTATGCAGAGAAACCATTTAAGCTTTCAAATCCGGTGTGAGATATCAAGGTCCGCAACAGATGAACAATAGCAA  
TAAGCAAGTTAACTTGCTTGTGGAATTCACAACCTGAACAATCTTGAGAATGAATATCCAGTAGCACGGATTTTTC  
AACCACAGTTACAAGTTCAGAATATGCTCAGTGAATCCAATAAGATCCTATCACAGAATGGTATTGTAGACGATACAAGA  
GATAGTATGTACAATCAGGTTCCCCGAACAGCAGTAGATTTCTCATTGAATCAAACATACCGCTGGCAGGAACCAACTT  
TCTTTTGAGTGCCAATTCAACTGTATCAGCAACTACGGAACAGGTTAACATTGGTTATGACAATTTAGCGAATTGTGTC  
AACAAAAGGCACAGGACTGGGGCTTACAAAATGTTGTTGGATCAACCTTTGATGCCTTGATGGAGCAAAATGGACAGAAC  
GTAAATGCTCCTATTGCGGAAGCAGTTTTCTCTAGTAGGCAAGAAATTGGACATGTTAATCCTATCGATGGTCCACAAGT  
TAACTCAGTTAAAGCAGCTGAAAGATATACCGATTCAAGCTATCAGAGCACTATTTTTCTTGAGCCATTTGAACAAGATA  
ACGACCTCATGAGTGCCCTTCTCGAGCAGCAGCACGAAAGTTCTGTTGGACAAGTTGACAGTGTGTTTGGTCACGATGAA  
GATGCATTGAAAATCTTCCAGTGTA

>CcARR4 |Locus\_ID=BC332\_13151 |CDS\_len=1899 |strand=+  
ATGGCAAGTATGAGTGGCGTCGGTGCCACGTGTAAGTCGGAAGCTACAGTGGTTGCTGATCATTTTCTGTAGGGTTAAG  
AGTACTTGTGGTTGATGATGATGTTGTTGTCTTCGAATTATTGAACAAATGCTTCGTAGATGCAAGTATTCAGTTACTA  
CTTGTACCCGAGCTACTGTGGCATTAAACCTATTACGTGAAAGGAGGGAGACTTTTGATATTGTACTGAGTGATGTTTCAT  
ATGCCTGATATGGATGGTTTTAACTTCTTGAGCTTGTGGATTGGAATGGACCTCCAGTAATAATGATGTCAGGTGA  
TGGGAGAACAAACCTCGTCATGAGGGGAGTTCAACATGGGGCTTGTGATTATTTGATTAAGCCTATACGGGACGAGGAGC  
TAAAGAATATCTGGCAGCATGTTGTTAGGAAAAGATATAACTCCAATAAAGAGCATGAATGTTCTGGTAGCTTGGATGAT  
AATGATCGGTATAAGCGAGGAAGTGATGATGTGGAATGTGCTTCTTCTGTAGTTGAAGGTGCAGATGGAGTGATAAAACC  
TCAGAAAAAGAAAAGAGAAGCCAAAGAAGATGACACTGAAGTGGAAAATGATGACCCAGGTACCACAAAAAGCCACGCG  
TAGTCTGGTCAGTGGAGCTTCATCAGCAATTTGTTAGTGCAGTCAACCAACTTGGCATTGATAAGGCTGTACCTAAAAGA  
ATCCTTGAAGTATGATGAATGTTCTGGTTTAAACGAGAGAAAATGTGGCAAGCCATCTGCAGAAATTTAGGCTATACTTGAA  
GAGGCTAAGTGGAGTAGTTCAACAACAGGGTGGCATAACCCAGTACCTTTTGTGGGCCAATGGAACAGAATTGAGAACTTG  
TTTCACTAGGGAGATTTGACATTCAAGCACTGGCAGCCTCTGGACAAATTCCTCCTGAAACTTTGACAGCTCTTCATGCC  
GAGCTTTTAGGTAGATCGACAAGTAACTTGGTTTTACAGCAGTAGAGCAACAGAATCTCCTACAAGCTTCTCTTGACGCA  
AGCAAAGTGCATGCCCTGTGACCAACTTGTGGCTTATGGTCAGCCTCTGTTGAAATGCCCTCCAGCAATTTCTAATTTCTA  
AACATCCTTCTCAATCTATCTTGTGAGCTGAGGATGTTTATTGAGGATTTGGATCCAGCAGCAAAAAATATATGCATG  
GTACCTAGCAGCAATCCCAGTGGGATAGCTGCTCCGAACAGCAACATGTTTATGGCAATGATGCAACATCAGCAACAATG  
GCAAAAGCAGCAGCAGCTGGAAGTGAACATAGGCAATCTGGACCTCTTGAAATCCAATATTCAATTAATGTTCAACCTT  
CTTGCGTAGTATTGGCCTCTCAGTCGCCTGGTAATTTCCAAGTGGGAGATAGTCTGCTTCCATCAGCCGTGCCAACAGT  
CTAAGTAAATCTTCGGTGGTTGATTATGGAGTCTCTCTCCACAATCAAATAATTCATCAGGTGTGATTCAAGTGTTAGA  
CAGGGAAGTCAAGACAGAATGTGGCTCAACAGGCTCTCAAGTGGAGGTTCCCTCTCTTGTTCATGCTCGATAAATGCTG  
ATAATAGTGTGTTGCTGCAATTTCAACTCGAGCTCAGCGTTTGGTTCTTCTAAACAACCTCCAGGCCTTAACCCAAAT  
CATTTGGGCTCGCCAGTTCCATATAATTAATACTCAAGCCAGGTTCTTGATCAGGGACATATAAGAAATCCTGTGGTTGG  
TAAAGGTGCCTCCATCCCAGTCGCTTTCAGTAGATGAGTGTGAATCGGCAATGTGCAATTTGAATACTGCAAAAAGCT  
ATCTCGAGGACGCTAAAGTTAAGCAGGAGCCTAATATGAATCTCATGGAATTTGCTAA

>CcARR5 |Locus\_ID=BC332\_28216 |CDS\_len=1746 |strand=+  
ATGATGATGGAGAACTAGTAAAAACAGTGGAGGGTTTTCTACTCCAAGAAGTGATAATAATACTTTCCAGCTGGTCT  
AAGAGTTCTTGTGTTGATGATGATCCTACCTGGTTGAAGATTCTTGAAAAATGCTTAAGAAGTGTCTTATCAAGTGA  
CAACATGTGGTCTAGCACGAGAGGCTTTGTATCTGCTCCGAGAGAGAAAGGATGGATTTGACATTGTGATCAGTGATGTT  
AACATGCCTGATATGGATGGATTTAAGCTTCTGGAGCATGTTGGACTTGAGATGGATCTTCCCGTCATAATGATGTCTGT  
TGATGGTGAACAAGCAGGGTGATGAAGGTGTTCAACATGGTGCATGTGATTATCTTTTAAAGCCTATACGAATGAAAG  
AACTTAGAAACATATGGCAGCATGTACTCAGAAAAAGATGCAGGAGGCAAGGGACGTTGGAATCATGAACCTTGACCAG

TATGATGAAGTGTGGATGCTTAATGGAGCTGAAATCCTTTCAGGCAAGAAGAGAAAAGATTTTGACAATAAGCATGATGA  
AAAAGAAATGTCCGAACCAAGAGGTGTTGATTCTTCTTCCATGAAGAAAGCCAGAGTTGTTTGGACTGTAGATCTTCATC  
AGAAATTTGTCAAAGCTGTTAACCAGATTGGATTTGACAAAGTTGGTCCCAAGAAGATCCTTGACTTGATGGGTATCCCA  
TGGTTGACTAGAGAAAATGTTGCTAGCCATTTACAGAAGTATCGGCTTTACTTGACTAGGTTGCAGAAAGAAAATGAAGT  
TAAGGCCTCATTTTGTGGGGTGAAGCATCCAGATGTTTCTTCTAAAGAACTTCTTCTAGTCTCAGCCTTCAGAATCCAG  
TGGATGTGTGCACTGATGTTACGAATGACAAGTATGGTGGTGTCTTGGAGGCAAAGCTATTGTTCAAATGGGAAATCC  
AGCATATGTGAGAGCAAGGTAAAGTTGTTGTTTCAGTGCCAGCAGCAGAGCCTAGTTCTGTGGTTGGAGATAACTTTGA  
TTCTCCTGCTGCTGTTTCAAAGATAGGCCTCAACGATTCTTTGGATTGGTGAATACTAATGTTAAGAATTCTAAGGTAC  
CCACTACATATTGCTCTACTGGAGAAGCTCCACAACCTCAATACAAGCAAGACTTTAATCAGTCAGCAAATGGGTCAAGT  
CACCAACCACTGCCGGTGGTTTCTCATCAAATCCCAGTGGATCACACACAAGAGACTTGTTTTCTCAGCCATGTACCTTC  
TCGTGAAGAGAGGGACAGACATCCAGATACAAAAATAAACCTTCTTTCTTCAAGAGCAAAAGTGAAGGAGTAGGAAAAAT  
ATTCTCCAATAGAAAAGTACTATTAACCTGTTTTCAACAAGTGAATCAACAAGCAAATTTTCACTACTCTTCAGCAAATGGCA  
AGTACTACATGGACTGGGACGAGTCATAATGTAGTCAATGGTCCACAATCAAGCGCAGGAAATCTAAGCTTCGAGAAGTGG  
ATCAATTGTTGCATCTGCAGGTGAGGACATGTGTGGTGCTTCTATTCTAGGGGAATGTTTTCTAGCTAATAATGGCCTTC  
CGAACACAGAACAATTTGGCTACAATGATCCACAACCCATTTCTGGAGTTCACACATGCTTGATGATACGTTGAGGTTT  
GATTATGAGTATCCAGTTGATTCATTGGAAGGTATTGTGATGGACCAAGGTCTGTTCATAGTCTAA

>CcARR6 |Locus\_ID=BC332\_00798 |CDS\_len=1683 |strand=-  
ATGATTTGCATTGAGGATGAATTATTGGGTTGGAAGATTTCCCAAAGGGGCTTAAAGTCCTGCTCCTTGATGAAGATAG  
CAACTCTGCTGCTGAGATGAAATCAAGGCTTGAGAAAATGGACTATATAGTCTACACGTTCTGCAATGAGAGTGAAGCTT  
TGTCTGCAATCTCTAGCAAATCCGAGGGCTTTCATGTTGCCATTGTGGAGGTAAGTGCAGGTGATAATGATGGTGTCTC  
CAATTTCTTGAAAGTGCCAAAAATCTACCAACTATAATGACATCAAATATTCATTCTCTCAGCACAATGATGAAGTGTAT  
TGCCTTGGTGCAGTTGAGTTCCTTCAGAAACCATTATCAGATGACAACTCAAAAATATATGGCAGCATGTAGTTCACA  
AGGCTTTCATGCTAGAAAGGATGTGTCCGGACCACTTGAGCCGGTAAAAGAATCTCTTCTTTCGATGCTACAGCTACAA  
CCAGAAAAGGGTGAACCAGATGACAAAAGTTCAAATGGAACAGAACCTCTCATTGCAGTTGCGGACAACAATACCGAACA  
GTCATCGGGCTGTGATAAATACCCTGCTCCCTCAACCCCTCAATTGAAACAAGGAGTGCGGTGAGTGGATGATAGTGACT  
GCCATGATCATACTATCTTCTCAGCTGACCAAGACAGTGGGGAGCATGATGAAGATATAATTTTGAAGAGGAGAATGGT  
TCATCTCCTCATCAAACATATGGAGGCTGATATTGCTACCTTTTCACAAATTAATGACTGCGCTGACAATAGTGATGGTTC  
ATCTCCTCATCAAAGACGGAGGCTGATATTGCTACTACCTCTTCACAAAGTAAAGACTGCCCTGACAATAGCATTAGTC  
ATTCTGCTGAACCTAGTAAAGCTTCTGGTCCCCATAGCTCAAGTGGGACTAAATCCAATAAGAAAAAGGTGAAGGTAGAT  
TGGACACCTGAACCTACACAAAAAGTTTGTTCAGCAGTAGAGCAACTTGGTATAGATCAAGCCATTCTTCTAGAATACT  
AGACGTGATGAAAGTGGAGGGCTTAACGAGACATAACATAGCTAGCCATCTCCAGAAATACAGAATGCATCGGAGGCAAA  
TTTTGCCAAGGGAAGTGGAAGGAGATGGCCCCATCCGCAACCTAGAGATTAGTACAAAGGAATTACTATCCTCATAAA  
CCTGTGATGACATTTCCACCATATCATTCTAATCATGTGCCCCAGCTGGTCAATGTTATCCTGCTTGGGTACACCGGC  
TAGTTATCCGAATGGTTTACAAGTGTGGGGTTACCTTACTATCCGGGATGGCAGCCTGCAGAGACTTGGCACTGGAAGC  
CTCATCCAGGGCTGCTTGTGATACATGGGGCTCCCTGTGATGCCACCATCGTTTGGATCGTATCCACCATATCCCAG  
AATGCTGGAATGTACAGTCTCACGGAATGCATAACAGATATAGCATGCTAGAGAAGTCATTGATGTTACCCGGCAGA  
GGAGGTGATTGATAAAGTAGTAAAGGAGGCAATAACCAAACCATGGTTACCACTTCTTTGGGCTTAAACCTCCTTCCA  
TGGAGGGTGTACTCGACGAGCTTCTAGACAAGGAATCTCAACCGTCCCTCCACGAATCAATGGCTCTCGTTGTTGGAGA  
TGA

>CcARR7 |Locus\_ID=BC332\_15933 |CDS\_len=1674 |strand=+  
ATGGTTTGCAGTGAAGATGACTTACTGGGGTGGAAAGATTTTCTAAAGGACTTAGAGTCCTCCTTCTTGATAAAGATTCT  
TAATTCTGCCTCTGACATGAGATCAAGGCTTGAGGAAATGGAATATATAGTTTACGCATTCTGCAATGAGACTGAAGCTT  
TGTCTGCAATCTCAAGCAAGTCTGAAGTATTCCATGTTGCCATTGTAGAGGTAAGTGTGGCAACAGTGATGGAGGACTC  
AAATTTCTCGAAGGTGCTAAAGATCTGCCAACTATAATGGTGTCAAATATTCATCTATTAGCACCATGATGAAGTGTAT  
AGCGCTTGGTGCAGTTGAGTTCCTTCAGAAACCATTATCAGATGATAAACTGAGAAATATATGGCAGCATGTAGTTCACA  
AGGCATTTTCACTTGGAGGAAAGAATGTGCTGAGTCGCTTAAGCCGGTTAAAGAATCTCTTTTGTCCATGCTAGAGCTC  
CAACCAGTAAAGCGCAAGCAGATAGTGAATTTCTAATGAAGCTGAACCTTGACCTCAGTATTGAAAAACCAAAAAGA  
ATCACCACCTTGCTGCGATAAGTATCCGGCTCCTTCAACCCCAACAACATAAACAAGGAGTGAGGTGAGTGGATGATGGTG  
ATTTCCAAGATCATACTATCTTGTCAAATGAACAAGATAGTGAGGTACATGAAGGGGACACAAAATCTGTGAACTACT  
TGTTGTGATTCTGTTGCTGAGACTAGTATCCTGGCAGATTCTGCCGGGCGACTAGAAGTGGCTATCACAAGGATGAGCG  
TGATTCTGCTGCTGATCAAATATGGAGGATCCCATTGCTACTTGTTCACGAAGTAATGACTACCCAGCCGATGGCAGTA  
CTCGTTCTGCTGAATCTAATAAAGCTTCTGGTCTCCATAGTTCAAGTGGGACAAAAGCTAATAAGAAGAAAATGAAGGTA  
GACTGGACACCTGAACCTACACAAAAAATTTGTTAAGGCAGTCGAGAACTTGGTATAGATCAAGCCATTCTTCTCGAAT  
ACTAGAGCTGATGAAAGTAGAAGGCCTGACAAGACATAATATAGCTAGCCATCTCCAGAAATTCAGGATGCAGCGGAGGC  
AAATTTTGGCAAAGGAAGACGAGAAAAGATGGCCTCGTCTCAACTTAGAGATTAGTACAAAGAACCTATTATTATCCA  
CATAAACCTGTGATGGCTTCCCGACCTATCATCCGAATAATGCACCCACAGCTGGTCAATTCTATCCTCCTTGGATACC  
ACCAGGAGGTTACCCGAATGGTGGCATATGTGGGGTTCGCTTATTATCCTGGATGGCAACCCCGAGAATTGGCACT  
GGAATCCTCACTCAGGACTGTATGCTGATGTATGGGGTTCGCCGTTACACCTCCATCTTTAGGATCATGTACACCGTAC  
CTTCAGAATGCATCTGGGATACACAACAGATATAGCATAATACAAAAATCAGTTGATCTTACCCGGCAGAGGAGGTCAT  
AGATAAGGTGGTAAAGGAGGCAATACACAAGCCATGGTTGCCTTACCATTGGGCCTAAAATCTCCTTCGACGGAGAGTG

TTCTCGACGCGCTTTCCGAACAAGGCATCTCCGCCGTTCTTCACGCATCAACGGTTCTCGTCGCCCCGATTGA

>CcARR8 |Locus\_ID=BC332\_23287 |CDS\_len=1284 |strand=-

ATGGCAGCTCCCTATTACGGTATGATTGATGAAGTTCATGTGGTGCTTGTTGATGACGACAAAGAGTTTGTTAATAACAT  
GGTTGATTTACTAAAGTCTTATGACTATAAAGAAGATACTCCTTATTGGACTAACTTTTAGCACTATTATGTACTTACT  
GTGATAGCCAAGATGTGATAGATAGGGCAGGGAGCATGATCTATAATGGTAAATCTCGTCATATAAAATGGAGGCATAAT  
ACCATTAGAGAACTACTCTCAAGTGAAATTATCACGGTTGACTATGTGAGGTCAAAGGATAATGTGTTGATTCCACTAAC  
AAAAGATCCATCTAGAAAAGGAGTTAAGAGTTCATTGAAGGGAATGGATTTACGGCCTAGGACAAGTCATCACTGTGTTA  
TGGTGGTTGGTACGGCTTTAGATGCAATGGCAATGCTCTCCAAAGGAAAGCAAAAAATTGATGTAATGATACTCAATATC  
CATTATCGAACACACTTTCTTTTACCTCTTAGCTCGAGTTGTGGCCTTAGATATAATTTCACTCGTTGTATGGGATGA  
ACAAAACGAATCTGGTAGTAAAGAAGGCTTTTGACGAAGGAGCTTATCTTTGCCTTAAAAAGCCATTTGATAAGGACATTA  
CCAAATCAACTCTGGCAATTTGTTGTAGGAGAAAAACTAAAAAGAGAGAAAGCAAGAAAAAGGATTCGAAAATAATAAAAAAT  
CAGATGAATAAGATCGTTAAGCGAAAGAATTGCACAGAATGGACTGAGGCTCTTCATGCCAAATTCATGGAAGCTGTACA  
ATTACTTGGTGAAGGAAGATGCTATCCCAAGGAGATTCTTGAGGTTATGAATGTGCCTGGTCTTACTAGGATGCAAGTTG  
CAAGCCATCTCCAGAAATGTCGTCGCAATGATTGGAGATCTCCGAAAGAACGAAAATCTCTTCATCGCCCATTAGGTCAG  
GGATCCTCAAGTGATTTTCATGAATCAAGAAGCAATGGGATAGTATCTAGTAGAAATATTAGAAATGAGATAAGTAATGG  
CTACAACCTGAATGTCAGTATGGATAATGTGACATCATATTCAAGTAACGCAACGATGTATGATACTTATGTTGGAAATG  
TGGCTATTAATGGATTGGAAGAAGAAAATCCAAATGTTCAACAATATATTGGTGAACCAAATATATCTAATATGAATAAT  
CCCTTCCAGAAGCTTGAACCTCCAAGTGCAAGCCTACATAATGAACAAGACAATGACTTTGATCAGGTTTACTATGATGA  
TTAG

>CcARR9 |Locus\_ID=BC332\_23270 |CDS\_len=873 |strand=-

ATGAATAAGATCGTTAAGCGAAAGAATTGCACGGAATGGACTGAGACTCTTCATGCCAAATTCATGAAAGCTGTACAATT  
ACTTGGTGAAGGAAGATGCTATCCCAAGGAGATTCTTGAGGTTATGAATGTGCCTGGTCTTACTAGGATGCAAGTTGCAA  
GCCATCTCCAGAAATGTCGTCCCAATGATTGGAGATCTCCGGAAGAACGAAAATATCTTCATGGCCCATTAGGTGAGGGA  
TCCTCAAGTGATTTTCATGAATCAAGAAGTAGCTTTAAAAAATTTGGGACAATGCCTCATCTTCAAATAAAGGAACCAAA  
TCTGAATTGTAACCCAGATAATACCCAAAGAAATTCAGATCTTTCAATTTCAAATCTTAGTACCAATAATACTTTTGCTC  
GAGAAGAGAGTCCATTTCAACAACATTTTATCGCCCGCACTTCATGTTCAATCTCCCTACCTCAGCAACTTCAACCCA  
TTCAGTAACCCATTTTTATCAATTCAAAATACTATTAGTGGTGGATTACAACAACAACAACAGAGATCATTATTCGG  
AATATTGTATTCACAAGGACTACAAGGCCCAATTATTAATAATAATAATTATAGGTCTGATGTTGTGATAAACAGTGGGC  
ATCATCATACTCAAAGTGATTATACCTTGAATTCTATTGTAGCCCAAGGAGCAACATATTCAGGTAGTGGGATAGTATCT  
AGTAGAAATATTAGAAATGAGATAAGTAATGGTTACAACCTGAATGTCAGTATGGATAATGTCACATCATATTCAAGTAA  
CGCAACGATGTATGATACTCATGTTGGAAATGTGGCTATTAATGAATTGAAAGAAGCAAATCCAAATTTTTAA

>CcMYBH1 |Locus\_ID=BC332\_28265 |CDS\_len=894 |strand=+

ATGGGTGCACCTAAGCAGAAGTGGACTTCAGAAGAAGAAGCTGCTCTTAAAGCTGGGATACTTAAGCACGGGCCAGGTAA  
ATGGCGCACGATTCTCAAGGATCCAGAATTTAGTGGAGTATTGTTTTTGCCTTCAAACGTAGATCTCAAGGACAAGTGGA  
GGAACATGACTGTAATGGCAAATGGTTGGAGTTCTCGAGAGCAAACAAAGTTGGCTGTCAAAAAGATGAAACAGGCCCT  
AAACAGGATGGGAGTCTATGACTGATACGACTGCTGCTGAAAGTGATGAAGAAGCTGCTGAAGCAAGGCCAGCCACAAC  
TTCTAGTGGTTCTCCACAGATACATGGTTCAAAAAATCTATGATAAGGTTGGATAATCTTATAATGGAGGCTATAAGCA  
GCTTGAAGGAGCCAGGTGGTTCTAACAAGACTACAATAGCTGAATACATAGAGGCTCAATACTGGGCACCTCCAACTTT  
AAAAGGCTATTGTGAGGAACTGAAGTATTTAACTGCAACAGGAAAACCTTATCAAGATGAAGCGTAGGTATAGAATAGT  
ACCTACTTCAACACCATTGACAGTAGAAGAACCTGTCCATTACACTTTTGGACAACAACAGAGGATCTTCTCCAAGA  
TTGATCGTGATGATTGAACATGCTTACATCTCAGATTGATTTAGAGTTGGCTAAAATGAAGCAGATGAAACCTCAAGAG  
GCTGCAGCTGCTGCTGCACAAGCAGTTGCTGAAGCAGAAGCAGCTATAGTTGAGGCTGAGGAGCGGATAGGGAGGCTGA  
TGCTGCTGAAGCTGATGCTGAAGCTGCTCAAGCCTTTTCAGTAGCTGCAACAAGACACTACATGGGAGAAGTGCCCCAA  
GGATGGTAAGACAT

>CcMYBH2 |Locus\_ID=BC332\_09595 |CDS\_len=867 |strand=+

ATGGGGAATCCGAAAGTGAAGTGGACGTGCGATGAGGAAGATGCCCTAAAAGCCGGCGTAGCAAAGCACGGTACCGGAAG  
GTGGAAGAATATCCTTAGGGATCCTGATTTGCGCTCTCTTTTGTCCAACCGCTCTAACATCGACCTCAAGGACAAATGGC  
GAAATATGTCTATTTACCCTGCTGGGCAAGGCTCTAAAGATAAATCTAGAGTTGCTCGTGCAAGACCAATGGCAATAGAT  
GCACTTGTGCCTTCCACTGCTCAAAATGTTACGCCTATTGCTTCAGCATTGAGCCTTCCCTTGCTCAAAGTGTTCCGGC  
TATCACTTCAGCATTGAGAATGAAGCCATTGATGATCCTCCAAAACTCCCAAGAAGGCCTTCACCTGTCTAATGATA  
TGATCTTTGAAGCTCTGTCATCCATGAAGGGTTCAAATGGATCTGATCTTGGTGCCATTGTTGGATTTATTGAGCAACGA  
CATGAAGTACCACAACATGCTAGAAGTTATTGACAACAAAGTTGAGAAGACTCGTATTGCAAGGAAAACCTGAAAAGGT  
CGAGAACTGCTATAAGATGAAAGATGCAACATCAGAAACCAAAATACCTACTCCAAAACAAAAACATGTCCGCTCATGGC  
CAGTTCCAAATTCGGCTGTAAAAGTCTCCTGTGGAACAACAGAAGAAGCTGCAAGGATTGCTGCTGAAAAGATTGTTGAT  
GCAGAACATAAGTGTCTTGGAAAGTTGAAGCGATTAAGATGCAGAAGTGACGTCAAAAATGGCTGAGGAAGCAGAGAC  
AATGTTACTACTTGTCAAAGAGATCTATGAACAGTGTTGCGAGGTGGAGTTGTTCTCTTGGCTTGA

>CcMYBH3 |Locus\_ID=BC332\_18613 |CDS\_len=843 |strand=-

ATGGGAAATCCAAAGCAGAAATGGACATCGGAGGAAGAAGAAGCACTTCGTGCTGGCGTCGCAAAGCACGGAGCTGGCAA  
ATGGAAGAATATTCAAAGAGATCCCGAATTCATCACCTCCTTTACTCTCGCTCCAATATCGATCTTAAGGATAAATGGA  
GAAATTTAAATGTTAGTGCCAATGGACAAGGGCCAAGAGATAAATCAAGGACACCGAAAGTGAAGACTAATCTTGATGCT  
GCAGCAGCTCCATTGCCCATCATGCAGGCCCTGTTTCTTCCACTCTGGTTCCACAAGATGCATCAGCCGACACTGTTAT  
GGAAGATTCTTCAAATGCGCATTAGATGGAAAAATGCTTCAAAGTATAATCAAATGATATATGATGCACTTTCAAGTT  
TGAAAGAGCCTAATGGATCTGACACAAGCACACTTGTTAACTTCATTGAGCAAAGGCAGGAGGTGCCCCAAAACCTTCAGA  
AGGCTGCTGAGTTCTAGGCTGAGGAGGCTTGTTCAACAAGACAACTGGAAAAGATTGAAAATTGCTACAAGATTAAGAA  
AGAGGTTTTGGAAAAACAAAGATAGCTACCCCAAAACAAAACATGTTGGGCCAAGGCAGTTTCAAATAGTGTCTATC  
TTGGTGACACTGCCGAAGAAGCAGCAATCACTGCTGCATATAAGATTGCAGAAGCTGAAAATAAATCATTTGTAGCAGCT  
GAAGCGCCAAGGAAGCTGAGAGAGTCTCAAAGATGGAGGAAGAAGTGATAATTCCTACAGGTGTACAAGGATATCTT  
TGACAAATGTTACATGGAGACATTGTGCTTCTGATGGCATGA

>CcMYBH4 |Locus\_ID=BC332\_03653 |CDS\_len=879 |strand=+

ATGGGTGCACCAAAGCAGAAGTGGACAGCAGAAGAAGAAGCTGCCCTTAAAGCTGGTGTAGCGAAGTATGGAGTTGGCAA  
ATGGAGCACTATTCTCAAAGATCCAGAGTTTGCTGTTGTGTTGCGCTCTCGTTCAAATGTGGACTTGAAGGATAAATGGA  
GGAATCTACATGTCATGGCTAGTGTTGGGGATCTCGGCATCGAGGAAGGGCTGTTTCTAAAAGTGTTGAGCCTGCACCG  
AAGCACGATGACAACAACCTTGTTAGCTCTGTGGGTGAGAATGATATAGAAGTTCTTGATGCTAAACCTCTTGATCGTC  
TGGTGAAGTGCTGAAGGATGTTGGCTCTAAAAACCTCTTACAAGATTGGATGATCTTATACTGGAGGCAATAGTCAAAT  
TGAAGGAACCACGTGGATCTAGTCGGAATGCAATTTCTTTTCATAGAGGAGCGCTTTGCGGCACCTCCACACTTTGAA  
AAATTGTTGGCAACAATTTGAAGGCATTGACTGAAAAAGGAAGACTGGTAAAGGTAAAGCATTACTACAGAATTGCACC  
GAGTAGAGTATCATCTGATGCCAAGGGTGGCTCTTTCTTTCACTTATGGGTGGGAAGCTTGATTCCACTGTGGTAGAAA  
AGAATGAACTAGAATACTGACTAAAGCTCAGATTGATGCGGACTTGGAGCAAATGAAGAGCATGAGTGCGGAGGAAGCT  
GCTGCAGCCGCTGCACAAGCAGTTGCAGAGGCTGAAGCTGCAATTGCTGAAGCAGAACGGGCAGCAAGGATTGCAGAGGA  
GTGTGAAGCAGAGGCAGAGGCAGCACAGTGCTTTGCTGAAGTAGCATCAAAGGCATTGCAGCATCAAACCTATCCATGTC

>CcMYBH5 |Locus\_ID=BC332\_32845 |CDS\_len=3201 |strand=+

ATGAGTTATTATGATCAACCTCCTCCCGTTGGTGTACCTCCCCCTCAAGGATATCCACCAAAAGATGCATCATATGGGTA  
CCCTCCTCAAGGGTACCCTCCGCAAGGTTATCCTCCTCAAGGTTATCCTCAACAGGGTTATCCTCAGCAAGCCCCAACAAG  
GTTATCCTCAGCAAGGTTATCCTCCTCCGCCATATGGTGCCCTCAATACGCCGCTCCACCTCCTCAGAAGAACTCATCT  
GGATCGACCGACATCCTGACTGGCTGGATTTTTTTTTTTGAATTTTGGATGGGTGCACCTAAACAGAAGTGGACTCCAGA  
CGAAGAAGCTGCTCTTAAAGCTGGGGTCCATAAGTATGGACCAGGCAAATGGCGGACAATCCTCAAGGACCCAGAATTTA  
GCAAAGTGTGTCCTCACGTTCAAATGTAGATCTAAAGGACAAGTGGAGGAACATGAGTGTGATTGCAAACGGGTGGGGT  
TCTAGAGAGAAAGCAAGGTTGGCTCTCAAAGAATGAATCAAGCCCGTAAACAGGATGAGAGTTCTTTAGCTGTCAATTAC  
TGAGGCTAAAAGTGATGAGAAAATGGCTGAAGCAAGGCTAGCTACTACTTCTATTGGTTCTCCACAGATTGGTGGGTCAA  
AAAGATCTATCATAAGATTGGATAATCTTATAATGGAGGCTATAAGCAACCTGAAGGAGTCAGGTGGTTCCAACAAGACT  
AGTATAGCAACATACATAGAGGATCAATATTGGGCACCTCCAAACCTTTAAAGGCTGCTTTCAGCGAACTGAAGTACTT  
AACTGCAACTGGGAGACTTACCAAGGTGAAGCGGAAGTATAGAATAGCAACAATACCTGTATTATCGGACAAAAGAAGAA  
TCCCTTCCATTCCGCTGTTGGAAAGCAGGCAGAGGATCTCCGCTACAGTTGATCAGGATGATTTCAAGATGCTCATTAAAG  
GCTCAAGTAGATTTAGAGTTAACTAAGATGAGGAGTATGACACCTCAAGAGGCAGCAGCAGCTGCTGCACAAGCTGTTGC  
AGAAGCAGAAGTATCCATGGCAGAAGCTGAGGACGCTGCTAGAAAGGCTGATGCTGCTGAGGCTTATGCCGAAGCTGCAC  
AAGCCTTAGCAGAAGCTGCAATGAAGGCTCTAAAAGAGAGAAGCAGCCCAAGGATTCAACTCTCTTGTGGCCTGTAAA  
TATGGTAAAAGTGGTGTGTTGTAATAGCAAAGGCCCTCCAGCCATGGATGGAAATTTGAATGATAATGCATTTTTGCGGGC  
TCGGATCAAAGAATTGGAGCGCGAGCGTGATGAATTGCATAAAGACATTGAGCAGCTAGCATGCAACAAGCTGGACCTA  
GCTATATTGGGATGCCATCTCGATGCCCTCTTCATAGGATGCTGGGTTGGAGCAGGAGCTGAAAGCTTGAAAAAGAAA  
CTATCTGCTTGCACACAGAAAAATCAGAATCTTCAAGAAGAGCTATCAGAAGCTTATAACATCAAAGGTTCAACTGGCTGA  
TCTACACAGCGCAGAAGTTTCCAAGAATATAGAAGCAGAAAAGCAGCTTAAATTTTTTCAAGGTTGTGTTGCTGCTGCAT  
TTTCTGAGCGAGACCATGCTGTAATGGAGGCTGAAAAGGCCAAGGAACAGGAGGAGCTTATGTCAAGAGGACTTCATGAA  
CTTCAGCAGAGGATTGAAGAGCTAAGCTGTGAATTACTTGAAGAGAAAAATATTGACGGCTACTTTGCAGGGTGATATGGA  
CAGGGAAGAGAGGTTGGATGAGATTTTCAAGGAGGTTGTCCATAAGTTCTATGAGATTAGACGGCAGACATTGGAGGATA  
TTGAAGATGTGTCCTGGGAAGATAAATGCGCGTGCCTCCTGCATGATTCGTCTGAAATGTGGACTTTCAGCAATCCTGGG  
GAAACATCCACCTCTAACTACATTAGTTCTCTGGAAGAACAAGTGGAGACACTGCGAAAATCTTTGGATAATCTTCAGTA  
CAAGCTACTAGTAGGTCTTGAAATAGAAAATCACTTGAAGAAAAAGTGCGCGCCTTGAAAAACAGAAAATCTTTTCAG  
AAGAGAAGCTGAGGGCTCAAATTTCCGCATTTGCCACTATCATTCTCAGCATAGAGTTAATATTACAAGCTTTCTTGAT  
GAGGGATTTTCTCATATTAATCAGCTATGAACATGGTGAAGAAAAGCTCAAGGACTGCAGCATAAGTGAGAGAGACTT  
AAATTCTTCTCAAGTGGATGATTTACAGTTCAGTGAACCTTGAATGTCAAGATGTTGAGATAAAAAATGTTGATGGTTTCAG  
ATTTGATCTTTAAGAGGAATCAGCCTAGCTTGACAACCTACCATTACTGTTGGAACAGTGATGCTTCTAAAGCCCTTGCT  
GTGGCACTAAACGAGAAGGTGGAACGTTATTACTTCTCTACAACAAGAAGAAAGACACTTATTGGAGAGGAATGTCAA  
TGCGGCACTGCAGAAAAAAGTTGAGGAGCTCCAGAGGAACCTACTACAAGTTACAAATGAGAAGGTCAAAGCTCTGATGG  
AGTTGGCACAGTTGAATCGGGACTATCAAGTATTGCATGAGAAAGTTAATGAGGCCTCTAGACAAGGAAAAATCTCTTGGT  
GAGATTGCAGTGAAGAGGACTCTCCAGGAAAAAGATGGAAGACTGAAAAATCTGCTGAAAACCTTCATATTTGAGACGCTG  
GACTGGTATACAAGATTGAGATGTAATGATGCTGACACTCATCGAGATTCTGAAGCAAATTTTGTGATAGGAGGCCCTA  
CCAATAACGTAGATTTTGTAGGATGAAGATAGAGAATGCAACTTTAAAGAGAGCTTAGAAAAGTATGGAGCATCTAATT

CGTGCACTTAGGAGGCTTCGCCTTTCACTTTTAAAGTTTAAAGAGTCTGCTGCATCCGAAGGTATGGAGAACTGCTACTC  
GGTGTCACTTGGACAATATTATTAATGAGGCAAGTCAGTTAAAACTGCACTTGGAAGCTCCCTCCCTCTTAGTTGGTCAG  
CGGAGGCAGATTACAGGATCAGTTAGCAAACATGTTGAAGAGGAGACAGATAATGGACACTCTACACGTGAAAAATATGGAC  
TTTGTCTGCTGCTGGATTTGAGATGGTTGAGCTTCTGGTGTGTCGCGCAGCTATTGAAAGATTACAAATGCAGTTG  
A

>CcSWI3A |Locus\_ID=BC332\_08722 |CDS\_len=1806 |strand=-  
ATGCATAACTATTCAAGCAAACCAATTAGTATTCAATTCACAAAGGGCTATTTGTCCACTTCCCCTCATTACATAGTAAA  
TCAATTCCTTGTGTCAGGTGAATTTGTAATGGACACATCTCGCTCGCAAGACGAACCGGACCACGACCTTTACACAA  
TCCCTAGTTACACCAAGTTGGTTTTCTTGGCAAAGCATACACGAAGTGGAAAGGCTATCATTGCGAGAATTTTCGATGGA  
AGTTCGATTACAAGGACACCCAGAATATACAAAGAGTATAGGGATTTTATTATTACATCTACCGTGAAGATCCGACCCG  
AATGCTATCGTTTACGGAGATCCGAAAGGCGTTAGTGGGTGATGTGACTGTGTTACATAAGGTGTTTACGTTTTTGGAGA  
AGTGGGGTTTTGATTAATTTTGACCCGAGTAACGCGGCTGCGGCTGCGGCGGCGGTTGGTGGTGTGCGGAGGAAGAGGAT  
AAGGAGGATGAGAAGTGGAGGATTAGGGTTGAAGAAGGGGCCCCACATGGGGTTAGGGTTGTGGCAGCTCCGCATTCTTT  
GAAACCACTGATACCTGTGAAGGAGGTGTTATTGGGGATGGAGGTGGAGGTGGTAGGGTGGGTGGTGTAGTAAAGGTGT  
CGCCTTTGGCATCGTATTCTGATGTTTATGGGGAGTTGGTTGGGGTGGAGAAGAAGGAAAGTGTGGTGTGTGAGAGCTGT  
AAAGAGCAGTGTGCTTCGGGTATTATGAGTACAACAAGGATGCGAGCATTAATTTATGCGAGAAATGTTTTAAAGTGG  
TAATTATGACAAGAACAATCGACAGATGAATTCAAGTTAATGGATGGGGCGAACCTAACGCCAACTGGACTGAAGCAG  
AACTTTACTCTATTAGAATCTGTACTGAAGCATGGTGTGACTGGGATCTTGTTACTCAAAATGTCAAAACAAAGAGT  
AACTGGATTGTATCTCAAAGCTTATACAGTTGCCATTTGGGGATTTTATGCTTGGTTCTATTATAGAAAGCTTAATTT  
TTTGGACAAGAATGGTGAGGTAAGTGGCGTGGATCAAGCTCAACCTGCAATAAGTGAGTCTGGAGAACTCCTGGAAATC  
AATCTCATGAGCAGAACCCAGGAGCATCAACAGAATGGAGATGCTGAAGACGAAACCCCTCCTCTCAAGAAAATACGCAGG  
GCTCCAATTTCGGAAGCCAGTAGTTTCTGATGAAACAGGTAGCTCGCATCTCTGGTGCTGTTGGTTCACATATCACAGC  
ATCTGCAGCTGAGGCTGCTGTTACAGCCCTTGTATGAGAACCAGTGTTCCACTGTGATTTTTGATGAAGACGACGATG  
GATTGGGATCGATTGCTGATATCAGTGAGACAGAGAGGGCGAGTCAAGTCGAAAGTGCTGAAGGGGTGGAAAAGCCTGGC  
AGATCAGAGACAGAGGTGGATGTCTCTCAGAGGAATACTATACTAATACTTTACGTATGAGGGCTGCAACTGCAACTGC  
TGTAGGTGCTGCTGCTCATGCCCAATTGTTGGCGGATCAGGAAGAGAGAGAAGTAGAATATTTAGTTTCTACATTGG  
TTGAAGCTCAGATGAAGAAGTTGCAACGCAAAATGAAACATGTGCAAGCTCTGAATCTGATGATGGAGAAGCAGCATGGC  
CAAATGAAGGATCTAGAAGAGTCTTTAGTTGCAGAGAGAATGGACGTCTTGCAAGAAGATGTTTAGTGCCGGGGTATCTAG  
ATGGAAGGATCATGCTCCGGTCAAATCTCAAAGCAGCAGCGTATAG

>CcSWI3B |Locus\_ID=BC332\_13234 |CDS\_len=1536 |strand=-  
ATGGCCGAATCCGGCGAAATCAACCCACCGGCACCTAAACCCAACCTGAAACTACCTCTCCGCCACCGCCGAGACAGA  
GCCACAGACACCATTACTGCCGCATCCGCCGCCGCCACCACCGCAACCGGGATCCTCCCAAGCAAAGCGTCCCCAGCAAC  
CGGAATCCTCCCCAAACCCGACGACCCCTTCCGCCACCGAATCCAAAGACAAAGACGTCACTCCACACAGCCATATCC  
TCCCGCCTTGCTGAACCTGAATTCGTCTATATCCCAGCTATTCCCGTTGGTTTTCATGGAATAGCATTATGAATGTGA  
GGTTCGCTTTCTTCTGAATTCCTGACGGAAGGTACCTTCTAAGAACCCTAAGACATACAAATACTGTAGGAATACAA  
TTATTCGTAGATTACAGAGATAACCCCACTAAAAAGATCACCTTTACTGAGGTTTCGAAGACCATTGTTGGAGATGTGGGT  
TCAATTCGTAAAGTTTTCGATTTCTTGGAGACATGGGGTTTGATTAATTACACTGCTAACACTTCCAAGTCTCTCATCAA  
ATGGGAAGAAAAAGAGTCAAAATCAGCATCTGCATCAGCTTCGCATAATGCTGACGCTAATGGAACCTTCCACTGATTGTA  
CTGTCCCAAGAAAAGGTGTGCAGTTCTGCAAAACTATTTGCAGGATTGCTTGTTTCGCTTCTGATAAGTATGATTTG  
ACTCTTTGTCAAGATGCTATGTTAGTGGTGATAATAGAGTCGGTGTGAATAATTACAGACTTTCGGCGAGTTGAGATTAG  
TGAAGAAGCTAAGACAGATTGGACGGACAAAGAGACTTTGCTCCTTTTAGAAGCTCTTCTGCATTATGGTGTGATTGGA  
AGAAGTTGTGTCGATGTTGGTGGCAGAACGACGAAGAAATGTGTGGCTAGATTTGTGAAGCTTCTTTTGGTGAGCAG  
TTTATGGGCCCTCTTGAATCTACAGAAGTGATAGTGAACCAAGTCTGAAACTATGCATCTCAGTCCAAGAGAATGCG  
CCTCACTCCCCTTGCCGATGCAAGCAACCAATAATGGCTCAGGCTGCTTCTCTCTGCTCTTGCAGGAAAAGAGGTTG  
CAGAATTAGCAGCACATGCTGCTGTACAGCTTGTCTGAGATTGGAGCGGGAATAACCAAAGGGAATCTAGGATCTCTA  
CTCGTGGTGCAGAGGGGCAAGAATCGGATGGCACTTCCAATGGGTATGGCAAGGATATCGAAAGAGCTATTGTTGAAGC  
AAGGCCCTCAGCTTGAGAAGGAGGCACTGGACCTGGAGAGAGCCGTCTCCGATGTGGCAATTGAGACCAAGGAGATTGAGG  
AAAGAATTGCTCATTTTGGAGAACGTGATTTACAGATGGAAAAGGAGTGGCAACAGCTGATGCAGCTTAAGAACCTGATC  
TTCATTGATCAACTTACTTTGCTGCTGAATAAAGCTAGTGCTCCAAAACTGGAGAAACCATTTGGGGAGGAGGTGATAGA  
TGTTAAGGCAGAAATGA

>CcSWI3C |Locus\_ID=BC332\_15732 |CDS\_len=2304 |strand=-  
ATGAAGAATCAGAACGATGAGGACGGGTTTGAAGACGAGGAAGATGAGGAAGAAATTGAGCAACAAGAGATGGTTGATGA  
CCTCCAAAACCTAATAATTCAGTGGATCGAAGTTATACAAACTCCGTTGTTGAGTTGGTGTGCGAAAGTAAGGAGAGGA  
TTAGTGAGTTTCCGATGGTAGTGAGACGTGCTGTAACGCGGCCGATTATCCGTGTTGAATATTGTGGCGATAGAGAAG  
GCTGGGCAGAGTGGGGAGAGTAAGCAGAATGGTGGTGTGGTATTGGAGAATTTGTCGTATGGGCAGCTTCAGGCACTTTC  
GGCTGTGCCTGTAGATCATCACGCTTGTGAGTGATGAAAGAGGAGAAGGGAGTGGGAGTGGTTCGTATGTGATTACTC  
CGCCGCAGATATTGCCTGGTTCGCGGTGTTGTTAAGCATTATGGTAGTGAGGTGCAATTATGTTGTGCTATGCACGCA  
GATTGGTTTTTACCTAATACTGTGCACAGATTAGAAAGACAAGTGGTACCACATTTTTTCTCTGGAAAGTCAGCTGAACA  
TACACCCGAAAAATACATGGAATGTAGAAATTGTATTGTTGCAAAGTATATGGAGTCTCTGTAAAGCACTTGTGAGTTG

ATGATTGCCATGGGATAGTAGCTGGCATTAGTGCTGATGATGTAACCTCGAATTGCAAGATTTCTTGATCATTGGGGGATC  
ATCAACTACTGTGCTGTTCCCTCCTAAAGATGAGGCACCAAAAGATGGCACATATTTGTATGAGGACTCAAACAATGATAT  
CTGTGTTCCGGTAGCTGGTTTGAAGTCTATTGACAGCTTAGTCCAGTTTGACAAGCCCAAATGTCGGCTGAAGGCAAAAG  
ATATTTATCCTGAACTTGTGCGTGA CTGCGATGACGACTCCGATTTTGACAACCTCAATCCGAGAAGTCTTGTCCGAAATT  
AAATGCAATTGTTGTTCTCGGCCTGTTTCACTGGCGTACTATCAGTCACAGAAGGAGATTGATATTCTATTGTGTTTGA  
TTGCTTCCACGAGGGTAGGTTTGTGCTGGTCACTCTAGCTTGGATTTTGTCAAAGTGAGCTCTATGAAAGATTATGGAG  
ATCTAGACGGAGATTCTTGGACTGACCAGGAAACCCTATTGCTTCTCGAGGGAATGCAACGCTACAAGGAAAACCTGGAAT  
CAAATTGCTGAACATGTTGGCACCAGTCAAAGCACAGTGCATCCTTCATTTTGTTCGTCTGCCTTTGGATGGTGCCTC  
GTTAGACAATATTGAACTTCCAGGTGCATCTGGTCCCTCGAGTTCTAGCACAGGTGAAGATCCTAACAAATCTCATTCAA  
TTTTGAATGGGAATCTTGCAGGACCAAGCACTGAAAACCTTTCATCCTGATAGCAAATTTCCATTTGAGAACTGTGGAAT  
CCAGTAATGTCCCTGGTTGCTTTTCTGGCATCTTCTGTTGGACCGAGAGTTGCTGCAGCATGTGCCCATGCATCCTTGGC  
AGCATTATCTAAGGATGATACCTTTAGGTGCAAGACGAAACATGACTCAGATGGATGGATCCACAGCAAATAATGGGACCA  
GTGTAGGAAGAATGCCTGGAAAGAATGGAAGTCTCATGGAGATGTTGGAAATTCGCATCAGCTAAAAGATGAAAAGTCA  
GGAGGACAAGGTCCACATGATACTGGAGGTGCTCCATTATCCACTGTAAGTGTAAGAGCTGCTGCTAAAGCTGGTCTTGC  
AGCTGCAGCTATAAAATCAAAGCTTTTTGCTGACCATGAAGAACGTGAGATTCAACGGTTATCTGCAACATAGTCAACC  
ATCAGTTAAAGAGGTTAGAGCTGAAGCTGAAGCAGTTTGCAGAGGTGGAGACCTTGTTAATGAAAGAATGTGAACAATTG  
GAGAGGACAAGGCAACGATTTACTGCAGAACGTTCTCGGATGATATCTCAACCTGGTTCCATTGAGTATCCCGACCAAT  
GGGGGTGTCTGGTGTGGTGCAGCAGTGGTCAAGCAGGAAATAGTAGGCAGCAACAAGTTGTTTCAGCTCCTCAAC  
AACAAAGTTTTGTTTCTGGATATGGAACCAACAACAGATGCATCCCCAAATGTCAATTTCTGCAGCAACAAGGAATGTAT  
GGATTTGGGCCTCGGCTGCCACTATCAGCGATACACCCTTCTCTTCAACACCCGGTATGTTTAATGCATCAGCAAGTTC  
CCAGCTGCTCTCAGTCATTCAATGCTTAGACCTGTATCTGGGACAAAATCTGGTTTAGGTTGA

>CcSWI3D |Locus\_ID=BC332\_22454 |CDS\_len=2832 |strand=+

ATGGAGGAGAAACGGAAGGACACCGGAACTCCACCACCGCCGTCCGCCGACACGCCGCCGATATCGGCTGACGCTCCGTC  
AGTTGAACCACCTACGTCGCGTCGGAGAGGTGGCGGCCACAAACGAAAAGCAAGCGCCATTGGGAGTGGCGCTAGTTCTA  
CTCCTCCCTCAACTTTATCGAAGCGTCAGAAACAATCAGCAGTACCTTTCCACCGATCCACAATGGTCCGCTCACAAGA  
GCTCGGCAGCAGCCAAACCACGCCGAGCTGCCGCCGCCGCCGAGCTGGTTCTCCGTGAGGTTTTGGTTTTACGATCGA  
ATCGGAGGTGTTTCCGAAGGCCGAGGCAGGTGTAGAAGAGGCAGTGAGAGTTGAGAAAGAGTCGAATCAAGTGAAGGAGG  
ATTTGGAGGCATTAGAGGCTGAAATTGAAGCTGAAATTGAGTCAATTGGATCCCAGATCGTAATGTTTCATATTGTGCCT  
ACTCATGCAGGTTGGTTCTTTGGACGAAGGTTTCATCTTTGGAGAAGCGAACAATGCCGTCATTCTTCAATGAGAAGTT  
GCAAAGTAGGACTCCAGAAATATACATGGAGATACGGAATTGGATCATGAAAAAGTATCACACTAACCCCAATATTCAAA  
TTGAGTTAAATGATTTGTCCGAGCTCTCAACAGGAGATTGGACGTTAAACAGGAAGTGATGGAGTTTTTGGACTACTGG  
GGTTTAATTAATTATCACCTTTCCACAAACCAATTGAGTTATGAACGTTGATATTGATGGGGACAAGGCAGCAAGGAC  
AGATTCTTTGATTGATAAACTGTTTCGATTGCAATCAGATGAAACGTGGACCCCAAGTTCTTCCAAGGTCTAGTGAGCTA  
CTCCTTCTGTGCTTTCGGGGTTCTTCCAGAGTCAGCAATTGCTGAAGAACTAAAGTCCGAAGGGCCAGCTGTTGAGTAC  
CATTGCAACTCTTGCTCAGCTGACTGCTCGAGAAAGCGGTATCATTGCCAAAAGGAGGCGGATTTTGACTTGTGTAGTGA  
ATGCTTCAATAATGGGAAGTTTGGATCTGGGATGTCCCCTTCAAGTTTCAATTGTTATGGAGCCTGGTGAGGTTGGCAGTG  
CAAGTGGTGGAAAGTGACAGATCAGGAGACTCTTCTTCTCCTTGAGGCATTAGAGCTGTATAAGGAAAATTGGAATGAG  
ATTGCGGAGCATGTGGCTACAAAGACTAAAGCTCAGTGTATTCTGCATTTCAATTGAAATGCCAATAGAGGATAGGTTCTT  
GGATACTGATGCTGAAAGTAACAAGCTTGTTAAAGAAAAAGAAGATGCAGTTTTGTCTAAAGATGATACATCAGCCAGTA  
AAGATGCCCCAGAAACAACAGAAACCAAGGATGATGGAATGACGATCAGCTTTCATCCACAGTGGAACATCGAAACCA  
GAGAATGTTAATGGGCCAATTCCTCAGGAGGAAGTTGGTGAGAACTGTGCACTCAATGCACTGAGGGACGCATTTACAGC  
TGTTGATTTTTATCTCCACCTGGCGAACGTCTTCAATTTGCTGAAGCTGGCAATCCTGTAATGGCATTGGCAGCATTC  
TGGTGAACTGGTGAAGATAAAAGGTTTTCTGCCTCAGTGCGCAGCTCTTTGAAATCCATTTCTGGTAATCCTTCTGGT  
GAGCAGCTAGCCTTAAGGCATGTTTTATTTTGAAGATCCACCAGATGATGGGAAGACATCATCTGATTGAGATAGACC  
TGCTAATGGATCAGTTGATCCAGAACATAAGAAAGATGAGGATGACAATGTTGAAATGCAGGAGGAAAAAGTTGACATCAG  
TTATTGATGAGAAGAGTTTGTGAGTTGGACAAGATAAAGAGACCAAAGGTGAAACAAACATTGACAAAAAGTGCGAAGAG  
CGGGATGGTGAAGAACCATGAAGAGAAAAATGAGAAGGAACCTGAAGTAGCGACACATTTGGTTTTCTACGAGTGACAAAAG  
TCAGGAGAAATCTGATACTTCAAACAATCTGGTGCAATTTCTACTGACAAAGAAGGGGAATCTGCATCACTTAAAGAGC  
CAGATGATGCAGGCTTGGCAGTGGGACAGACACCAAGTACCACAGCAGAATCAAATGTTTTAACGTCTAAACTAGAGGTC  
CCACCTGGGTTTCGAAAAGGAGTCAGTTGATGAAGCTTCAATGGCCATTCTTCTAACTCTCCAGATACTCCGAAAGATGA  
GGACATGATGCCCCTGTGCAACAAAGGAGCCTGAGCAATCCATGAAATCGAACATTGTACTTGAAAATGGCAAAAATA  
CAGGGACCGTAGAAGTCAAAGACTCTGTAGATGGGAGAAAAGATCCATTGAAGACCAAAAATGATCTGGATATTGATAAG  
ATCAAACGTGCAGCAGTCACTGCTTTGTGAGCTGCTGCAGTCAAGGCGAAGTATCTTGAGATCAAGAAGAGGACCAAAT  
TCGGCTGCTTACTACGGCATTAAATAGAGAAGCAGTTACACAAGCTGGAGAGCAAGATAACCTTCTTTCATGACATGGATA  
ATGTGGTTATGAGGGTCAGAGAAGTGTGGAGAGGTCAAACAGAGGCTTGTGAGCGAGCGTCAACAAATAATTAATGCA  
AGACGTGCTGGGCCACAACCTGTACTTGCTAACCGGCCTGGAATGACTCTTGCTAATTGAGCACCTAGGCTTCCAAGTGC  
AATGAGCTCCCCGAGGATACCGAATTCAGACCCATAATGGCAGGAGCTCTACACCAAGCTCTTTTATGCCTACAACAG  
TTTCAGGAAATTCATGACGCTTCAAAGTAG

>CcRAP1 |Locus\_ID=BC332\_23251 |CDS\_len=1497 |strand=+

ATGAATTTTGATTATATTTTCAACAATAATATTGCTGGAGATAATGAAGAGCCAAACAGAGAGAAGAAGAGAGGTAGAAA

AAGCTCGAAAGAGATTCAAGAAGAAATACACCAAACAAGTGTTATTAATCAGGCTGTAAGGCGACAAACCTGCACAATAT  
GGACTGACGATCTTCATGCCAAATTCATGGAAGCTATACATCAACTTGGTGAAGGGAGATGTTACCTAAGGAGATTCTT  
GAGGTGATGAACGTTTCTGGTCTTACCCGTACCCAAATCTCTAGCCACCTTCAGAAATGTCGTAGCAACAGTTGGAGAGC  
TCCACGAAAGCAAAAAGCTATTTGTGACTCATTAAGTCAGGCATCCTCAAGTGGTACTCAACAAAAGAATAGCTTTAAAA  
ATTATGGAGCAATGCCTCGTCTACCAAATCTACAATGTAACCTAGATCAAATGGAAAGAGGCTCAGAGTTTTCATTTTCA  
GTACCCAATATCAACAATATTTTTGCTAGAGGAAAGAGTTTGACTCAACAACAACCTTTATCATCCACAGCCTCAGGTTCA  
ACCTCAAGCTCAAAACAATGTTGGTGGTGGTCTGCAGCAACATGGACCATCATTTGGACTGCTGGGTTCAAGGATTAC  
AAGGCCCAACTATTGGAACATTATTTATAAGCCTGGTCTAACATTTAACAATAGCGATCATTATACTCAAAGTGATTAC  
AACTTGAATCTCAATGCTGCCATGACACAACATATTCAAGTAGCGGAATAATGTCTGACACAAACATTGATGCGGCAAT  
TAATTACTACAACCTGAAGGTCAATTTGGATAACGTGACAACATATTCAAGAAGTTCAATGATTTCTAATACTGGTGTG  
CAAATTCGACTATTAATGAACCTGGGAGCAGCAAAATTTCCAGAAGAATATTGGTGAATCAAATGAACATGACGAC  
GAGCTTGTTCAAGTTTCAATTTGATGATCAGGTTTCGAGCTCAATTTTCTGACCGAGCTTAGACAGGATCAGTTAGCCAG  
CATCAGCAGTAGTGGAATCCTCATACTTCGAGGACAAGTTTATCTTATATTTCAGTTTCGGATGCTCAGTTTTCCAATCG  
AGCTTAGAAAGGATCAGTTAGCCAGCATCAGCAGAAGTGGTGAGTCAGTTGTTGCTAACCAAATCTATAAAAAAGTGCTG  
ATCACTGTCCTTCATAAGGTCATGTTAGCAGATTTGATAGAGTTAGATATGGTGGATTTTGATCTTATTATTGGTATGGA  
TTGTCTTCAATTCTATTATGCATCTATAGATTGTTGCACCTATGTGGTGAAGTTTCAGTTCTAGATGAGCCAGTCTTTA  
AGTGGTCAGAAGATCTCTAGAGGTACCTCCCGATAGAGAGATAGAATTTGGTATTGACCTTCTCCAGATACTCAACCC  
ACATCCATTCTCTTATTATATGGCTCCGACCGAAGTTAAGGATTTAAAGGAGTAG

>CcAPL1 |Locus\_ID=BC332\_07646 |CDS\_len=1149 |strand=-  
ATGTTCCATGCTAAGAAACCTTCGACTATGAATTCCATGACAGACCCATGTGTGTTCAAGGAGACTCAGGTCTTGTCTT  
CACCCTGATCCTAAACCTCGTCTTCGTTGGACCGTTGAGCTTCACGAGCGTTTTGTTGATGCTGTTACTCAGTTAGGTG  
GACCTGATAAGGCAACACCTAAACTATTATGAGAGTTATGGGTGTTAAGGGTTTAAACCTTTACCATCTCAAGAGCCAC  
CTTCAGAAATTTAGACTGGGAAAGCAGCCTCACAAAGAATTCAATGATCACTCGGTGAAGGATGGTGATAGAGCAACCAG  
TTTAGAACTCCAAAGAAATTCGGCATCCTCATCTGGAATGATCGGGCGTAATATGAATGAGATGCAATGGAGGTACAAA  
GAAGGCTGCATGAACAACCTGGAGGTACAAAGACACCTTCAGTTGAGGATTGAGGCACAGGGAAAGTATATGCAGACTATA  
TTGGAGAAAGCTTGTCAAACATTGGGGGGCGAGGAAAATATGGCGTTACCAGCAAGAACATTTAAAGGCATTGGAAATCA  
GGGAGGACTAATACCGGACATTTAGCTGCCTTTAAAGAGTTTGAACCCCTCCTCTAAGTTTCTCCTCATTTTCAGGACC  
TGAATATTTGTGGAGGACACGACCAACAGCTCGAAGTTTCATGCTCAGAGTAGCATGGGTGAAAGGTCATCATCTTCGAT  
GGATTTCATGAACCTAGGCAATACTACTGATCATAACTTGACTCTGGGAAAGAAGAGGCCTAGCCCTTATAGCAGCAATGG  
GGTAATAGCAATGGAAAGAGCCCCTTTATGTGGTCTGATGATTTCCGTCTCCAAGAATTAGGCGTAGCAACAGCAGCAG  
CTTTAGGTCCTAATAATGAAGACGACCACCAGATTATTCAGATGGAAAGGAGTTGCAATCCCGAGCTTGATTCCGTGTCT  
GACCTTTACGAGTCAAAGCCAATCCTGCAGGAGGAAAAGAAATGCGACGCCAAGCTGGAGAGGCCCTCCCGAGAAGAGC  
CGCCAGATTTGAGTTTGAGTGCCCAAGGTGGACGAAGCTCTGTTTTCGGTGAATTACTAAGTTGGCAAGATGGAAAGG  
TCACCGACGGTGGAGAGAGGCGGGAGTAA

>CcAPL2 |Locus\_ID=BC332\_15958 |CDS\_len=702 |strand=+  
ATGTATGAGAATGATGGGGTGGTGATGACAAGAGATCCAAAGCCAAGATTGAGGTGGACTGCTGAATTACATGACCAATT  
TGTGGATGCTGTAACCTAAGCTTGGTGGTCTTGATAAAGCAACTCCCAAATCAGTACTGAGGTTAATGGGCTTGAAGGGTT  
TGACACTATACCATTTGAAGAGTCATTTGCAGAAGTATAGACTTGGACAGCTGGCCAAGAAACAAAATGCAGCGGAGGCA  
AACAAAGAGAACTGTGGGGACTCCGGACAATTTAGTTTGCATTCTCAGGCCCCAGTACCTCTTCATTAAGTATGAAGTT  
TATGCAAGGAGAAGTCGTCCAGTCGCAGATGCAGTAATGTGTGAGATTGAAGTTGAGAAAAGATTACAGGAGCAGCTTC  
AGGTGCAACAGAAATTGCAATGAGAATAGAGGCACAGGGCAAGTATTTGCAAGCAATATTAGACAAAGCTCAGAAGAAG  
CTCCCCAACATGAAGTCTCTAGTGACCAAGCAACACAGCTCAACTCACTGCTTTTCAGTTTACCTCTGTCAAATTT  
ACTGGATTACACAGTACATGGAGAGAACCGGGATAACAACATAGAGCTGTTACCAACACCTAATCACATCGTTGAGAAAG  
AACAAAAAATGATATGAATTCCATTAATTTGATTTGAACTCAAGAAGTAGCTTTGTATGA

>CcAPL3 |Locus\_ID=BC332\_00901 |CDS\_len=456 |strand=-  
ATGGATAGGATGTATAATGGTGGTGGAGATGGTTATGAAAATGGAGTGGTGATGACAAGGGACCCAAAGCCAAGATTGAG  
GTGGACTGCTGATTTACATGATCGTTTTGTTGATGCTGTCACTAAGCTTGGTGGACCTGATAAAGCAACTCCCAAGTCCG  
TACTAAGGTTAATGGGATTGAAGGGCTTGACACTCTATCATCTCAAGAGTCATTTGCAGAAGTATAGACTTGGACAGCAG  
GCAAAGAAACAAAATGCAGCAGAACAAAACAGAGAGAATATTGCAGCGGAGTCCTTCGGACAATTCAGTTTGCATTCTC  
AGGACCGAGTATCACTTCATCAAGCATGAATGGTATGCAAGGAGAAGCTCCAATCAGTGAGCAACTGTGGTGTGAGTTG  
AAGTCCAGAAAAGATTACAGGAGCAGCTTGAGGTTCAACAGAACTACAAATGAGA

>CcAPL4 |Locus\_ID=BC332\_31366 |CDS\_len=876 |strand=-  
ATGTATTCTGGTTTGGGTATGGAAAGAAATGGAGGAATGGGTGAATATCATAATCATCATTTTTCATCATAATTTACAAAG  
TTCAATTACTGGTGAATGAACAATTTGGTAGGGGATGCTTGTCTGGTTTTAACTGCAGATCATAGGCCACGTCTCCGGT  
GGACGGCTGAGCTACATGAAAGATTTGTTGATGCTGTTACTCAACTTGGTGGTCTGATAAGGCGACACCGAAAACAATT  
ATGAAGGCAATGGGGGTGAAAGGACTCACCTTATATCATTTGAAGTCACACCTGCAGAAATATCGCATAGGGAAGCAATC  
TAAGGAGGCAGCGGAGAACTATAAAGACGAATCATGTATGGCAGAGAGTCAAGATACAAGTTCCACAGCGTCGGGTTTCAT  
CAAAAGTAGTTGCCAGGATATAAATGACTGTGGATACCAAGTTACCGAGGCTTGCCGAGTACAGATGGAAGTCCAGCGA

AGACTACAAGAGCAGCTAGAGGTACAACACCATGTCCAGCTTCGTATCGAAGCACAGGGGAAGTACTTGCAAACGATACT  
CGAGAAAAGCATGTAAAGCTCTTAACCTACACTGCCTTGGAATCTCCTGAAGTACACTGCCAGGGAACAACCTTTCTGAAT  
TAGCAATCAAAGGCGCCAACGCCAACAACTGTGATGGGATTGTGCGGGTTTCTTCATTACCTGAAGTTGTTACAAGTTTC  
GAGAACCAAAATGCTTCCGATATGCCTGCTACAAGCTTGGTTTCTCCCACGAGCATCGGTGTTCTAAAGAAGAGACCACG  
ACCTCTAGCTAACGGGGATGCCTTGCCCGTGGAAGACAATATGACACCAAGTGCAATGGATGATGACTAATTCCTGA

>CcAPL5 |Locus\_ID=BC332\_06463 |CDS\_len=879 |strand=+  
ATGTAATCAACATTGCCTATAAGGAGTTTAGGTATAGAGGAAAGTGGTGATTTTTTCAATCTACAAGGTTGTCTTTCAAGT  
TGATGGTACAAATTTGCCAGGTGATTCTTGTGTAGTTTTATCAACTGATCCTAAGCCACGTCTTAGATGGACTACTGAAC  
TTCATGAACGTTTTGTTGATGCTGTTACTCAACTTGGTGGTCTGATAAAGCAACGCCAAAAACAATTATGAGAACAAATG  
GGGTGAAAGGTTGACCTTATACCATTGAAGTCACATCTCCAGAAATACCGCATGGGGAAGCAATCTGCTAAAGAGGG  
AACTGAGAATTCTAAAGACGTATCATGTTCCGGCAGAGAGTCAAGATACAGGTTCTCTACATCAGGTTTCATCAAGAGTTA  
TTGCGCAAGATATAAATGAAGGCTTACAAGTAACTGAGGCTTTGCGAGTACAGATGGAAGTCCAGCGAAGACTACATGAG  
CAGCTAGAGGTACAACGCCGTCTACAGTTTTCGTATAGAGGCACAAGGAAAATATCTGCAATCAATTCTTGAAAAAGCTTG  
TAAAGCTTTTTAATAGCCAGTCCCTTGAATCGAATGGCCTAGAAATGAACGGAAGACCTCCCTGCATTAGCAACGAAGG  
TTGCAAACGACTGTGAAGGGATCATCACTGTCCCTTCATTACCTGAGATTGGCTCGAGTATTGAGAACAGGAATGCTTGT  
CACTTGCCCTGCCAGACTTGCGGATTGCATGCTTGATGACTGCTTGCCATCAAATGGAATCGGTGCTCTAAAGAAGAGACC  
GCGAGCTTTTACTAACGCCAATGGATTGCCTATGGAAGCAATACAAGGGAGGTGGAATGGATGATGAGTAATATATGA

>CcAPL6 |Locus\_ID=BC332\_12550 |CDS\_len=972 |strand=-  
ATGTATCCAAGATTGATTCAGTCTGGACAAGAAGATGAGTATATACAACATCATGGGTGTGATGTTAATGTTGTTGGGAT  
TCATCATCAAAGGTAAATGGAGGAGACCCTTGTCTTGTCTAACTTCAGATCCTAAACCTCGTCTCAGATGGACTGCTG  
ATCTTCATGAACGATTTGTTGATGCTGTTACTCAACTTGGGGTCCAAGTAAAGCTACCCCAAAGGCGATAATGCGGACA  
ATGGGTGTCAAGGGACTAACTCTTTTCCACCTAAAGAGTCACCTTCAGAAATATCGACTAGGTAAGCAATCTCAGAAAGA  
TCTTGATGAGGCTTCGAAAGATGGACTTACAGCTACGTATTCGTTAGAAAGCCCTTGTTCTGGTGGTACTCCTCAGCAAT  
TGCCTGCATCGGACTTGAATGAAGTTTTGAAGTCAAGGAGGCATTGAGAGCTCAAATGGAAGTGCAAAGTAAATTGCAC  
CTGCAAGTTGAAGCCGAGAAACACTTGCAAATTCGTGAGGATGCTGAACAAAGATATATTACCATGCTGGAGAAGGCCTG  
TAAAATGCTTGCTGATCAATTCATCGGTGATGTAGTTACTGAAAATCATCAAGAGACTTACCAAGGATTAGGAACAAAGA  
CACAACCTTAGTCCTTTATGTAATCCAAACGGATTGTGTCCCTCGGATTCTGCTGACCTTATTGGAGTCCATGGACCGGAA  
GAAGTTTCCCCCAGAATCCATCCACAGCGCACGGATTGCTCCACTGAAAGCTGCTTAACCTTCACATGAGAGCCCAGCTGG  
ACTTCCTCTAGAAGGATCTTCACCTGGAGGGAAAAACGAGGGCTAAGCGGAGATTCAACACATGCATCATATGTTTGGG  
GTGAAGCTGATATGAGATCATCAGGTGTTACGCGATACAGGTTAATTGCTTCGGGATTACTGGCTCTAACGTTCAAAAT  
GTCTCGAATTAA

>CcDIV1 |Locus\_ID=BC332\_32995 |CDS\_len=771 |strand=-  
ATGTGGATAGAGTCATATTACCAGAACACCTCCTTAAATTCCTCAGCAAAAACCTCTCTTTATTTTACATTCAAACCAA  
AAAAAAATAACCAAATCAACGATGATGTACACAACGAACAATCGGTGGATGATCGGCGACGCGGCCAACAATTCACCGG  
CTATGATTCAATCAAATTCACATGGACACGATTGGAAGACAAGCAATTCGAGCAAGCCCTAGTACTGTATTCTGAGAAC  
GACGTTGAACGTTGGCAGAAAATAGCAAATCATGTACCTGGAAGAACAGTAGAAGATGTGATGATGCACTATGATACACT  
TGTTTCATGATGATTTTGAAGTTGATTCTGGAAGAGTTGAACCACCGAGTTATCCTGATGATGATGGAGGATTTGGTGGTG  
ATTGGGATGAATTGGATGGAGGTAAATTGAGTCAGATCTCCTTTGGTGGTGGAGCCAGTAAGAAGCAAGAAGTTGAGAGG  
AAGAAAGGGACTCCATGGACTGAAGAAGAACATAGGTTATTCCTTATTGGGCTGGACAAATACGGGAAGGGTGACTGGAG  
AAGCATTTCAGAAATGTAGTGGTGACGAGGACACCGACACAGGTGGCCAGTCATGCTCAAAAATACTACCTTAGGCAGC  
AGTCAATGAAGAAAGAACGGAAAAGATCGAGCATAATGACATTACCACCGCAGTGGATACGAAGATGGTGCCTCCTCAA  
AACAGTCTTCAGAATCAAGGAGCGTATCAGAATTTCAACTTCCCCATGTAG

>CcDIV10-1 |Locus\_ID=BC332\_15633 |CDS\_len=1197 |strand=-  
ATGAGCACCGATCAGATATGCAATAGCACCTTCTGGAACCAAGGAGGAGGAAAAAGTCTTTGAGACTACCCTAGCGATCTA  
CTTTAAGGGTGGTGATCTATTGACGAAGATGGAAGAAGCGCTTCTTGTAATCGCGTGATGATATCATAAATCACTATA  
AAATATTAATCGAGGATGTTGATGCCATCGAGTCTGGACGTGTTCCATTACCTAATTATCCAGAATTGCCAAGCCATTCC  
AACCAGAAAAGCCGATTTCCAAAAACAATCTAGCACGGCGAAAAGGGGTTGCTTGACAGTAGAGGAACACAGGTGCTT  
TCTCCGGGGGTTAGCTATATATGGGCGAGGTGACTGGAGAAGTATAGCCAGGAACTGTGTGATAACAAGAACATCAATGC  
AAGTGGCTAGCCATGCCCAAAAATATTTCAATCGCCTCAAAGCCGTCAACAAAGAGAATAGAAGAATGAGCATTACGAT  
ATAACTATTGTGGATGCTGAAGTCGCTGGAACCTCCCAAGTACCATATACTGAGGGCATGATTTGGCCTGCTTGTGGAGG  
TTCGCAAGCGGTGGCATGCACTAGCAATCAGAACATGTTACCTCCAGAAAGCACCAATGCTGAGCAGATGATAGCAGTTG  
CTGGAGGAGAGTCTCAGGTCACTGCTGCATTTGGCAGTGAATGAATAGTATGTCTGATGAGGATGATTTTCATATTG  
CATATTGATGACCTAATCGTGGATCCCGAGGACGCTAATGAATCTGAGATTCTTGTTGATGGTGGAAAGTCGCTATTACC  
CAGCAACAACCATGTACTGCTGGTAGTAGTGAAGTAACAATCATCCTATCTTCAGAGTTGGAAGTGAAGTGGGAGCAT  
TAATCACTAAGCAAATGGACGAAGACTATGATTTCTTTTCCATCTTTGATGATGGGGATGCACCAATTTCTCATGCAATG  
GTGTCCAATGCTGCTCATAGTGGGATGACAAGTTTTGCAGTGGCTAGCAACAGTGCTAACAATCCACCTCAGAACACGGT  
GTCTGCTCATAGCGGAAGGACCAGCTTTGCAGCTGCTAGCACCGGTCTAACAAGGCACCTCTGAACATGGTGTCTGATC  
ATCCTCAATTACCTCACGTTGCCCTTCATCTAACTGTGTTGTGCGAGAATGGCTCCAATTTAAATACTACCATTGA

>CcDIV10-2 |Locus\_ID=BC332\_15631 |CDS\_len=1203 |strand=-  
ATGAGCACCGATCGGACATGCAATAGCTCCTTCTGGA<sup>-</sup>CAAGGAGGAGGACAAAATCTTTGAGACTACCTAGCAATCTA  
CTTTAAGGGTGGTGATCTATTGACGAAGATGGAAGAAGCACTTCCTTGAAATCGAGTGATGATATCATAAATCACTATA  
AAATATTAATCGAGGATGTTGAAGCCATCGAGTTTGGACGAGTTCCATTACCTAATTATCCAGAATTGCCAAGCCATTCA  
AACCAGAAAAACAGATCTTCAAAAACAGATCTAGCATGGCGAAAAGGGGTGCTTGACAGTAGAGGAACACAGGTCATT  
TCTCCGGGGGTTAGCTATATACGGACGAGGTGACTGGAGAAGTATATCCAGGCACTGTGTGATAACAAGAACATCAACGC  
AAGTGGCTAGCCATGCCAAAAGTACTTCAATCATCTCAAAGCCGTCAACAAAGAGAATAGAAGAATGAGCATACACGAT  
GTAATATTGTGGGTGCTGATATCGCTGGAAC<sup>-</sup>TCCCAAGTACCATATACTGAGGGCATGATTTTGCCTGCTTGTGGAGG  
TTCGCAAGTGGTGGCAAGCACTAGCAATCAGAGCTTGTTACCTCAAGAAAGCACCAATGCTGAGCAGATGTTAGCAGTTG  
TTGGGGGAGAGTCCCTCAGGTCATAGTGCTGCATTTGTCA<sup>-</sup>GTGGAATGAATAGTATGGATCCTGATGAGGATGATGAGTTC  
ATAAAACATATTGATGACCTAATCGTGGATCCAGAGGACGCTAATGAATCTGAGTTCCTTTGTTGATGGTGGAAAGGTCGCT  
ATTAGCCAGCAAACAACCATGTACTGCTGGTAGTAGTGGAACTAACAATCATCCGATCTTTATAGTTGGGAGTGACCTGG  
AAGCATTAATCACTAAGCAAATGAACGAAGACTATGATTTCACTTTCACTTTGATGATGGGGAGGCACCAATCTCTCAT  
GCAATGCTGTCCAATGCTTCTCATAGTGGAAATGGCTAGTTTGCAGTGGCTAGCAACAATGCTTACAATCCACCTCAGAA  
CACGGTGTCTGCTCATAGCAGAATGACCAGCTTTCAGCTGCTAGCATCGGTCCTAATAATGCACCTCAGAACATGGTTG  
CTGCTCATCTCAATCGCCTCATGTGCCCCCTCATCTAACTGTGTTGTCGGAGAATGGCCCCAATTTAAATACTACAAT  
TGA

>CcDIV11 |Locus\_ID=BC332\_16553 |CDS\_len=381 |strand=-  
ATGGTCCAAATAAA<sup>-</sup>ACCATTGACGAGCTGAAACA<sup>-</sup>CAATTACCAATTGTTAGTGGATGATGTTACAGCCATTGAATATGG  
CTATGTTCCAATCCCAAATTATACTGTAGAGGAAAATAGCTATGGCTATTCCAGAGTTTCGAGGGATGATTGGCAGTCCA  
ATGGGAATGAGTTTGCAGAGACAGCCCAATGCCAGAGAGAAGAAAAGGGACACCATGGACTAAAGAAGAGCACAGGTTA  
TTTTTGCTTGGCTTAGAGAGGTATGGGAAAGGCGATTGGAGAAGCATTTCAAGGAACATTGTGATATCAAGGACGCCATC  
TCAAGTGGCCAGTCATGCTCAAAGTACTTTA<sup>-</sup>ACCGTTTGAAGAAAAACCAGCATCCATGA

>CcDIV13-1 |Locus\_ID=BC332\_23075 |CDS\_len=1047 |strand=-  
ATGGTGGCACATCGCGGTGAGCCACTAGAAATTGATAATTGGGA<sup>-</sup>ACTGGGGCTTCAACGCGATGCGGGCTTATCACGAAG  
GTCCACTAGAATTGGACAATTGTCATTTTGGCATCCACGCGACACGGAAATAGAAGAGATAGCCTAGAAATCACTGAAG  
GAAGAGAAGAGGAAGAGCAAATAGATACAGTCTATGTTGATTTGGCCGCTGAAAGGAAAAGTAGACATTAAGGACCAAAA  
GATGACACTAAGAGCACTTTCATAGTAACACGGGTAGTGAGATTGAGCACTTGTCA<sup>-</sup>GTAGGCTTGAGTGACTATGAAGG  
TGAGGGTTTTGACTTCGATTATGAGAAGTACATTACTGATAATACATGTCTTGCTGCGGTTGATTCTGTTTACCAACCAG  
ATATTTATGGTTGTTTTGTGATATAATGAATCTCATCCGTTTTCTGAATCCTCTGCAAGAACTTACCCTTTTCATGCTT  
GAGCCTTTCCTTGATGTCAAAAAGAAATGAGAACCGACCGGACATGCAATAGCTCCTTCTGGACATTGAGGAGGATGGA  
AGAAGAACTTCCAGGGAATCGGGTGATGATATAATAA<sup>-</sup>ACTACTATAATATATTACTTGAAGATGTGGAAGCCATAGACT  
CTGGACGTGTTCCAATACCTAATTATCCAGAACTGCAAAGCATTTCCAACCAGAATTCAGAAGCAGATGTAGAAAGGCAA  
AGAGGGGCTTCTTGACAGAATTGGAACACAGGTCATTTCTCAGGGGCTTAGATAAATATGGAAGAGGTGACTGGAAAAG  
TATATCTAGGTACTGTGTGATAACAAGAACACCAACGCAGGTGGCTAGCCATTCCCAGAAGTATTTCAAGCACCTCAAAG  
CCGTCCCCAAAAGAATAGAAGAGCGAGCATTTCTCGATATAACTAGTGCAGATGCTGAAGCCGCAGGAACATCACAAGCA  
ATGCCAAGTACTAACAATGAGAGCATATTTCTCGACAAAGCACCAATGCTGAGCAGATCATAGCAGTTGCTGGAGGAGT  
GGCTTGA

>CcDIV13-2 |Locus\_ID=BC332\_23074 |CDS\_len=1290 |strand=-  
ATGTTGAAACTCATCCGTTTTCTAAATCCTCTGCAAGAACTTTCACTTTTCATGTTTGAGTCTTTTCCTTGATAGTCCAAA  
GAAAATGAGCACCGATCGGACATGCAATAGCTCCTTCTGGACTAAAGACGAGGATAAAGTCCTTGAGAATACCTTAGCAA  
TCTACTCTGACGATAAAGATCTTTTACAAAGATGGAAGAAGCACTTCTGGGAAATCGCGTGATGATATCATAAATCAC  
TATAATATATTAATTGAAGATGTGGAAGCCATCGATTCTGGACGTGTTCCATTACCTAATTATCTGGAATTGCAAAGCGA  
TTCCAACCAGAATTCAAGAGCAGATGTAGAATGGCGAAGAGGGGCTTCTTGACAGAATTGGAGCACAGGTCGTTTCTCC  
GGGGCTTAGATAAATATGGAAGAGGTGACTGGA<sup>-</sup>AAAGTATATCTAGGAAGTGTGTGATAACAAGAACACCAACGCAGGTG  
GCTAGCCATGCCAAAAGTACTTCAAGCGCCTTCAAGCCGTTCCAAGGAGAAGAGAAGAGCAAGCATTCTCAACATAAC  
TAGTGCGGATGCTGAAGCCGCAGGAAC<sup>-</sup>TTCAAGCAGTGCCAAGCACTAAGAATGAGATCATGCTGCCTCGAGAAAGCA  
TCAATGCTGAGCAGACCATAGCAGTTGCTGAAGGAGAGTCTCAGGCCATGATGCTGTTTTTGTCAATGGAATGGATAGT  
CTGAATCCTGATAGGAATGGTGAGTTCATATTCAGCATTGATGACATAATCATGGAGGAGGAGGACGTAAATGAAACTGG  
ATTTCTTGTTGATGCTGGAAGATCCCTATTACCTAGAGAACAGCCATGTGCAGCTGCTAGCACTGGAGCGTACGGTCATC  
CTATCACTAGAATTGGGAGCGACCTTGAAGCGTTACTCACTGAACCCAGGGAAGAAGACAATGATATCAATTCCATATTT  
GTTGTTAGGAAAGCGCCAAC<sup>-</sup>TTCTCATGAAGTGTGCTCAATGCTGCTCATAGCGGTATATCCAGTTACGCAGCTGCTAG  
CTTCGGTGCTGAAAATGCACCTGAGAGCAATGTGGCTGCTTATAGCGGAATGTCCAGTTATGCAGATGCAAGCTCCGATG  
CTGTCAATGCACCTGATAACATGGTGGCTGCTCATAGCGGAATGACCAATTTTGCAGTCACTAGCAGATTTGCTTCTAAT  
GCACCTCAGGACACGGTGGCTGCACATGCTTCTCAGTTGCCTCCCTTCTCCCTCTCATCTAACTTTGATGTTGGAGATGC  
CCCAATGTAA

>CcDIV14 |Locus\_ID=BC332\_14807 |CDS\_len=657 |strand=+

ATGGAGAATTCTCCAGAGAACAATGATGTTTTCTATTGTTTCTGATGATGATGGTCATGATCAACAACATCACCTAGTGCA  
ACAGGAAGATAATCATCGTCCATGTCGTCTCGTGGGAACTCCATGGACTAAAAACGAACACCAGTTGTTTCTTATGGGAC  
TTAACAGATTTAAAAGAGGGGATTGGAAGAGCATTTCAAGATACTATGTTGTTTCAAAGACACCGACACAAGTGGCCAGT  
CATGCTCAAAAGTACTTCTCTCGTCAGGATAGTAAGACTCCGGTAGAGCGTCTCGCCCCAGCATCAATGACATTCAAAC  
TGTCAGTCTTAATCTCAAAACAACGTCAATAACAACATATGGGAGCTACTTATCTAATCAATAATAACAGATTTGCTTACA  
ACAATAATCATCAAGCCGCTTCTTCATCAATACATTTTCACTATCCTAGTTACACCTTTAGTGGTCCAACATTTAGCAAT  
AACTTCAATGAAAATTTTGAATATCTCATTGGGTGAAACATCTGGCAGCAACTCGTCTGTTATGGGGAAAAACAACAA  
CAACAACAAATTCAACAATCTAAATAGGCCAGTGTCTCCTCGCCATTTCTTTCGACATACTTGTCTTCAATTAGGAGGA  
ATGACCCCCAAATCTAA

>CcDIV2 |Locus\_ID=BC332\_07426 |CDS\_len=879 |strand=+  
ATGGAACTTTATTTTCTAGTAATTCGTTTTTACCAAATTCAGTTGGATGAGCAAGAGCATAGAATGGACTAAAGAAGA  
GAACAAGCAGTTTGAAGTGCTATTGCGATATATGACGAGAATACTCCTAATAGATGGTTCAAGGTGGCAGCTCACATCC  
CTGGAAAGACAGTTATTGATGTAATGAATCAATACAAGGAAGTTGTTGCAGATGTTTGTGACATTGAAGCCGGATTGGTC  
CCAAATCCTGGTTATTTTGGCTCTTCGATTACTCTAGAATTTGTGATCATTGTGGATTACAAACATTTAGAAAAAGAGG  
CAGCAGATCTTCTGATCAAGAAAGAAAGAAAGGTGTACCATGGACAGAAGAAGAGCACAGGAGATTCTGATGGGACTTG  
AGAAGTATGGAAAAGGGGATTGGAGGAACATATCCAAGAAAATGGTAATTTCAAGAACACCAACTCAAGTGGCTAGTCAT  
GCTCAGAAATACTATCAGAGACAGATTTCAGGAGGCAAAGATAAGAGGAGACCTAGTATTCATGACATTACCACTGTCCA  
TTTACCACAGACGCCACGTCCCAAAACAACCTAGCGTACAACATTAATTCTTTGTCTAAAGAGAAGTTCTATGCAACCA  
GCTCCTCTTTCCAGAAATTCACAACCACAACAGATATAGTGAAGTGTGGAATGCCAGCTTATTAAGTGAACACGTAGAT  
CTGATGGATTTTGGATCATTGTATGGCAGTTCTCCGTTTGTGCGATACCCATACAAGATTGCTTCACAGTATTGGGATGA  
ACATGGAGCAAACAGTATTACTTTAAGTGGTAATCCACAGCTCCAGCTCCAATCCACAAGATATCAATATGGGATTGA

>CcDIV3 |Locus\_ID=BC332\_13887 |CDS\_len=729 |strand=-  
ATGGAACTTTATGTCCTACTTCTTTTGTACCAAATTCAGTTGGACTATGCAACAGAGCAAGAGTACTACAGAATGGAC  
TAAAGAAGAGAACAAGAAATTTGAAAGTGCTCTTGCAATATACGACGAGACGACTCCAAATCGATGGTCTAAAGTAGCAG  
AAATTATCCCTGGGAAATCAGTTCTTGATGTGATGATGCAGTACAAAGAATTAGTTGCAGATGTTAGTGACATTGAGGCT  
GGTTTGGTCCCAATCCGAGGCGTTTCTGTCTTCTTTGCGGTTGGAATTTGCAGATCATCGCAAGATTTCATACGTTTAG  
TAAGAGAGGCAAGTCTTATGATCAAGAAAGAAAGAAAGGTGTACCATGGACAGAGGAGGAACACAGGCGATTCTAATGG  
GGCTAGAGAAGTATGGCAAAGGAGATTGGAGGAACATATCGAGGAATTTCTGTATCTCTAAAACCTCCAACACAAGTGGCT  
AGTCATGCTCAGAAGTACTACTTAAGACAACCTTTCAGGAGAGAAAGAGAGAAAGAGACCTAGCATCCACGACATCACCAC  
CGTCAATCTCACAAACAACGAGTTGCTCAACAACAACAACAAATTGATGTGTGAAGTGAAGTCTTATATGTCACCATTCG  
AGAGATCAACAAGCCCAGCAGACGTACTAATCGGCTGCTGGAACAACCTCATTTGATGGAGACCTTATGGCATTGTTGGTCAA  
TTTGTATGA

>CcDIV4 |Locus\_ID=BC332\_23536 |CDS\_len=882 |strand=-  
ATGAATAGTGAATGGGATTTCTATCCCCTGCAACATACATCAAGAACTCAAGTTGGTTATTTGAGGAAAACAAAGGAAC  
AAGATGGACACCTGAAGAGAACAAAGTGTGTTGAAGAAGCGCTTGCGTTGTTGATAAGGATACACCGGATAAATGGTATA  
ATGTAGCTGCCATGATTCCAGGGAAGACAGTGAATGATGTGATCAAACAGTATAGAGAATTGGTAGATGATATTAGCGAT  
ATTGAGGCAGGACTAATACCTGTACCTGGCTATACAACCTAGTAATTTCTTTTACATTAGAGTGGGTAAATAATCAAGATGG  
TTTTCATGGATTCAAGCAATTTTATGGTCCTTCTGGGAAGCGTGGCTCGTCAAATCGATCTTCTGAACATGAGAGGAAGA  
AAGGTGTGCCATGGACTGAGGAAGAGCACAGGCAATTTCTGTTGGGGCTGAAAAAGTATGGAAAAGGAGACTGGAGAAAT  
ATTTGCGGGAATTTTGTGACCACAAGAACCTCAACTCAGGTAGCTAGCCATGCTCAGAAATCTTTATTAGGCAGCTTTTC  
CGGTGGAAAGATAAAAAGGAGATCAAGCATACATGATATCAGAGTTGCAATCTTACGGAATCTAAGTCGACTTCCCCTG  
AGGATCATAAATCTGCCCCACTCCACAAGCGCAACAGCATTACAAATGAATGGTATGGTAAAAACACTATGTGAGTAT  
AATTCACCAAATCAAGAATCAGACATAACATTCAACTCATCAAGTGGTGGTGGTCTGATTACCATGCCTTTTCGAGGGGC  
TCCATCTTATGAACTCGAGCATGGAATGCATAACATTGCTCTACAAGGTCTTCAGTTTGGTAACTACAATACTATGTGTT  
GA

>CcDIV5 |Locus\_ID=BC332\_17375 |CDS\_len=921 |strand=-  
ATGGAGATTCTATCACCAGCTCCTTATCTTGCAAATCCAAGCTGGTTTCTTGATGAGGGAAAGAGTACTAAATGGACTCC  
AGCTGAGAACAAAGGCTTTTGAAGATGCTCTTGCTTTGTTTGATAAAGATACACCAGATAGATGGCAAAGAGTTGCAGAAA  
TGGTACCAGGGAAAAGTGTGGTGATGTGATAAGGCAATATAAGGAATTAGAAGATGATGTGAGTAGAATTGAAGCTGGA  
TTAATTACTATTCTGGTTATAGTACTTCACCTTTTACATTAGAATGGGGGAATAGTCATAGTTTGTGAGGTATAAGCA  
AACTTATGTTGTTGGTGGCAAAGGCCTTTGTCTAGTAGGCCTCCAGAACAAGAGAGGAAGAAGGGTATACCATGGACAG  
AAGAAGAACATAAGTTGTTTCTAATGGGGCTTAAAAAGTATGGAAAGGGGGATTGGAGGAACATCTCGCGCAACTTTGTT  
GTTACTAGAACTCCAACCTCAAGTGGCTAGCCATGCTCAGAAGTACTTTATTAGACAACCTTTCTGGTGGCAAAGATAAAAG  
ACGTGCGAGTATTCATGACATTACAACAATAAATCTCCACGATAATCAAACGTCTTCACCAGATTACCAGAAACCAACTT  
CACCTGATCAACCAGCTGTGATTTGCGAGCAGCCAAAATCGGCTGCCAATGCCGTGCACAAAATGCCATTTCAAGTGAAT  
CAGGCCAATAATGGGACAGCCATGGGCTTCAATTCTGCACAAGGAAGTTTGTGTTATGTCCCCTCTTTATGGAGTAACTC  
CTATGGGAACAATAAATGCAAAGCCAAAGCCTACAAAGAGGTGCTTTGCATGAACCTTACTTTGGATCTCAAAGTATGA  
ATTTTCAGCTGCAATCAGCACATCAGTACCATCAAGCGTAA

>CcDIV6-1 |Locus\_ID=BC332\_28756 |CDS\_len=1086 |strand=+  
ATGAGCCTCGACCGAATGCAAGAGGTCCTCCTGGACTAAGGAGGAAAAACAAAGCATTTGAAAAATGCCTTGCTGATTA  
TTCTGGAGATAGAGATCTAATTCAGCAGATTGCTGCTGCAGTTCCTGGGAAATCTCTTGAAGAAGTTATCGAACATTATC  
TTGTATTAGTTGAAGATATTAAGATATTGAGTCTGGTATAGTTCCGCTACCTAAATATCGGAGAATGCAAAGTTCTACC  
GAACGGCGAAAAGGGATTCTTGACAGCAGAGGAACACAGGTTGTTTCTCCAGGGGTTGGCGAAATATGGAAAGGGTGA  
TTGGCGGGCTATATCGAGGAACCTTTGTGTTATCTAGAACACCAACACAAGTGGCTAGCCATGCCCAGAAGTTCTACACTC  
GATTAAATGACAAAAACAACCCGAAGAAGAGAAGAAGTATTGATGTCAGTGTGCTAACATTACTGAACCTTCA  
CAAGGACCTTGTGGAGGACGATTACAGTGGCCAATCACCAACTATGTCACTGATGCTTTCAACACAGGGATGCTATCTAT  
ACCAGAGCCAGTCACAACCCGCATAAGTACTGATGCTATTGAAGGAGCATCAGCTGCTGACCTGGAGAAAAATCCCTCTTG  
GTGCTGCTGTTGGTAATGAGTTGAATAGTTCATTTCCAGGCATGGTTGAGTTCGTCCAAAGTATAGAAGGCCATATCATT  
GTACCGGCAGAGGTGCCCTCTGGAGTGTGTCATGGGGTTGACACTAAGACATCTCCATCGCATAGCTTGCAACCGTCAAT  
TGCTGTTGGCTCTGGAATGTACATTCCTTCATTCAATAATGTTAGGTATGATTTGACAGCGCTAATGAGCAAGCAGTTGT  
TTGGATCCAGTCAAGTAGGTCCTACAGTTAACTCTGCAAGTTTGCCATTACCAACTATTGATCGTATTGGAGTCCAGGAT  
TGTATAGCTTCACCATCCATTCCTGGAAGTAGTAGCGGTGGAACCTTATCCCTGTTGGAATCCTAGCAACATTGATGACAA  
TACCTTTGATTTGGTAAACCTATTCCCAGATGGTCTAGGCCAAATAA

>CcEFM1 |Locus\_ID=BC332\_24443 |CDS\_len=1323 |strand=+  
ATGAATATGACATCATCAAATTCAGAACTAAGCCTTGAATGCAAACCACATCAAAGCTACTCTATGCTTTTGAAATCATT  
TGGGGAGAAAAATTGATCAAACACAAAATCTTGAAGAATTCTTAGCTAGACTTGAAGAAGAAAGGGTTAAGATTGATGCTT  
TCAAACGTGAACCTCCCTTTGTCATGCAACTTTTAACCAATGCTATGGAGGCTTCAAGGCAACAACCTTCAATCCCATAGG  
GAAAAATAATCATATTGGACACAGACCAATTCTTGAGGAATTCATTCCACTTAAGAATAACAATAATGCAAGTGTTGAATT  
AGGAGCAGAAAAAATAGTTGCAAATAACACATCTACTATTGTTGATAACAAGGCAAATTGGATGACTTCTGCTCAATTAT  
GGAGTCCACCAAGTGATCATCAAGAAACAAAGCAAATACAAACATCCAACAATACTTCTAACAAGAAAAATGATCATCAT  
ATAGGCTTTTCTATTAGCCCAAAATTAGCCTTGGACAACAATTCTTCATGTCCAAGTCCAACAACACTAGCACTTGCTTC  
ATCTAACAACAAAAATGAGTCAACAATAGTGGAAGATCATAACAAGAATTTGGAAGGAGTGAATATTCAACAAGATTCTC  
AAAGCATTGGAGGTGGTACCAACAGCACAAGTACAAGTACTCAACAACAACAGCCACATAGAAAGGCAAGAAGATGTTGG  
TCACCTGATTGTCATAGGCGTTTTGTTAATGCTCTTCAAATGCTAGGTGGTTCTCAAGTGGCCACACCAAGCAAATTAG  
TGAATTAATGAAGGTTGATGGATTGACCAATGATGAAGTTAAAGCCATTTGCAGAAGTACAGACTTCACACACGAAGAC  
CAAGTCCAAGTCCACAAGCAACAACAGCACCACCACACCTAGTGGTTTTAGGTGGCATATGGGTCCCACCAGAGTACGCG  
GCTGCCGCAGCCACACATGGTGGTGCACCACCTGCAGCGACATTTTATGGACCACATTCAACTAGCCATGCACCATCACC  
ACATTACATTGCGGCCCCACAAGCGGTACACAAGAGTTCTACAGTACGCCACAACCGTTACAATCGCTCCACCACCTCC  
AACACCACCAACAAATGTACCATCATGGTAGTCACATGTACAAGCCACCTTCAAATCACATTCTCATAGCTCACCTGAA  
TCCGATGCTCGAGGGACCGGTCAACACGGTGATCGATCATCGGAGAGTATCGAAGATGGAAAATCGGAGAGTTGTAGTAG  
TGAAAATGGTGGAGAAAGGAAGTTGTGGTACACAAATTCTAG

>CcEFM2 |Locus\_ID=BC332\_27315 |CDS\_len=1209 |strand=+  
ATGATGATCAACAACAATAATTTCAATGAGAAAAATGCAAAGATGTCAACAATATATTGATGCTCTTGAAGAAGAACGTAG  
AAAAATTCAAGTTTTTTCTAGAGAACTTCCTCTTTGCTTGAACCTGTCACTCAAGCTATTGAAACATACAAGCAACAAT  
TATCTGGGACAACAACAGAGTACAACCTTAATGCACAATCTGATGAATGTACTGATGATGATGAACATACATCTAGTGAT  
GTTCTATTTTGAAGAATTTATTCCATTAATAAAGGACATTTTCTCATGAATATGAAGATCAAGAAGATGCTCATGATGA  
GGAAAATGAATCTCATAAATCAAAAAATAATAATAGTAATAATTCTACTATTTCTAAGGACAACAAGAGCAACACAAAGT  
CTGATTGGCTTAGATCTGTTTCAGCTTTGGAATCAAACCTCAGATCCCACTCTAAAAGAGGTAATTAATTTTTACTATTTT  
CTTACTTTCAATTTGTTTCTCTTTTTCTTTTTCTTTTTATTTTTAAAATCTCTCGTAATATTTTTTTTTGTGATTATCC  
AATTTTAGGTATATATTTGTCCATGTATGTTATCATTCAATTAAGTCTAGCTTTGGTTTCGTTTGAAGAAAAATAAAGAAG  
AGAAAAGATGGACAAAGAAAACAAAGAAGGTGTTGGTCCCAGAGTTGCATAGAAGATTTTTACAAGCCTTACAACAACCTT  
GGTGGCTCTCATGTTGCTACACCAAAACAAATTAGGGAGTTAATGAAGGTGGATGGACTTACTAATGATGAAGTTAAAAG  
TCATTTACAGAAATATCGGTTACACACGAGAAGACCTAGTCCTTCATCAATTCACAACAACAACAACCAACAACCACCAC  
AATTCGTGGTAGTCGGAGGAATATGGGTCCCACCACCAGACTACGCCTCTATGGCCGCTGTAGCACCAGCGGCCTCAGGC  
GAAGCATCAGGAGTCGAAACTCCAATGGAATCTACGCACCCATTGCTACCCATGCAAAGGGTCCCCTACATGATCATGC  
ATCATTAGGGGGAACCTAAAACAATAAGGCAACAACACAACGAGAAGCCATCGCGCTCCTCTGAGCGCGATGGTAGCC  
ACAGTCACAGTGAAGGTGGTGGCGTACATTCTAGCTCTCCGGCTACGTCGTCTTCTACACATACTACTACTGCTTCACCA  
GCTTACTAA

>CcEFM3 |Locus\_ID=BC332\_22367 |CDS\_len=1224 |strand=-  
ATGGGTTTCGATCCCACCTGAATTGAGCTTAGATTGTAGACCAAGTTTTGTTCTCTGAATCTGTTACTGATTTTCTTAGAAA  
AGTTTCTTTGATCCGTCATATACCTGATAAACTAGCACAGATTGATGATTATATATCCAGACTTGATGATGAAATGAGGA  
AAATTGAAGCCTTTAAACGCGAGCTTCCTCTTTCTGTTCTTCTGTTAAAGACGCTATTGGAACCTTTGAGAGAAGAATCA  
ATGCAATATAGAAAATCAAGAAAAGAACAGTATTGGAAGAGTTTATTCACCTGAAGAAGAGTTTGGATGAAGATACTAA  
AGCTGAAATCACGGCTAAAGATAAGGACAGTAGAGAAAAGATGATTGGATGAGCTCTGTGCAGCTCTGGAACAGTGAAT  
CTCACTGTGAAAAGACCGATGAAGTGAATAAAGCAGCCATCTAAATCAGAATTGAAAGTGGATACTCGGAAATCCCTT  
GAAGAAGAAGGCATAGTTCAATAACTGAAGATCCATTCCGGTCGTATAAAACCATGAATGTGGGAAAGGCATTTTACC  
TTTCAAGGGTTTTTTCAGTGGCAGCAGTTAGGAAGGACAATAAAGATGAGCTACCAGGAGTAACAGGATTATCGCTTCATA  
CTCCTGGAATTGCGAAGCTGAGGGAGGATACTGTGACTAGTGGTTTGAATTCAAAACACAATGGTAGCAGAGGTGGATTA  
TCTAGTGCAGCAGGTTGCCAATCAAATATAAGGACTGGATCACTGGCTCAGCAGCAGTCTGCTAGAAAGCAAAGAAGATG  
CTGGTCACCAGAACTGCATAGGCGATTTGTCGATGCACTCCAACAACCTGGGGGTTACAAGTTGCAACTCCTAAGCAGA  
TTAGAGAGCTCATGCAAGTGGATGGCCTAACCAATGATGAAGTAAAGAGTCATTTGCAGAAATATCGGCTTCATACACGA  
AGGGTTCCAAATTCACAGACCCAACCAGCAAATAAGTCTGGCGTGGCTCTGGGAAATTTATGGATGTCCCAAGGCCAATA  
CGTGGAAATCCTCAAAGCGCAGTAGTTCTCAATCTGGTTCCCTCCCGGTCCTCTACACTTGGCTGTGAGTTGTGGCGGTA  
CTTCCACGACTGTGGGTGATAGCATGGAAGAAGAAGATGATTTAAAATCTGAGAATCACAGCTGGAAAAACCATGTTTAC  
ACCTCTGGAAAGATTGATGTATAG

>CcETC3 |Locus\_ID=BC332\_24253 |CDS\_len=261 |strand=+  
ATGCAAGGTAAGGCTGCATACGATACACATCTTTGTGGTGTGCCCTTTCCCGTACAGAAGGAGAGCCTTGGAGTAACCGC  
ATTTGAGGCCAATAATGAAGAACTTCGAAGCTTGAATTTTCAAGACGAGGAATTCCTCGTTACTAAAATGTTCAACT  
TAGTTGGTGAGAGGTGGTCATTAATTGCTGGAAGAATTCCAGGAAGAAGTGCAGAGGAAATTTGAGAAGTACTGGAAGTCA  
AGAAAATTCACCAGCCAGTAA

>CcGLK1-1 |Locus\_ID=BC332\_34438 |CDS\_len=1344 |strand=-  
ATGCTAGCTGTGTACCTTTGAGTAACACAACGGCAAGAGATGATAACACGATGGAGAGTTTTGCGATTGGAGGAGGAGT  
TGATTTCCCTGATTTTCGTTGGGGAGAATTTACTTGACAGCATTGATTTTGATGACCTATTTGTTGGAATCAACGATGGAG  
AGGTACTGCCAGATTTGGAATGGACACTGAAATACTTGACAGATTTTCAGTTAGTAGTGGCGATGAATCCGATGTGAAT  
AACTATAGCAGTAGTAATAAACTACGTTTATTTCTACTGCTACAAAAAATGTAGAAAGAAAAGATGAAACGGAAAGAGC  
AGCCTCGGATGTAGGTTCCGGTTTAAACGAGCTTAAATCAAGGAGAAGAAATTGTTAGTACTCAAAAAAGTGAAGAATCTA  
CACTACAAGTGAAACAGAATATCACTCCAAAAGAAAGTGATAAAGGCCAAAAGTCATCCAAGAATAATCTTCCAGGCAAG  
AGGAAAGTAAAGGTGGACTGGACGCCAGAATTGCACAGAAGATTTGTACAAGCAGTAGAGCAGCTAGGTGTAGATAAGGC  
AGTCCCATCAAGAATTTTGGAGATCATGGGAATCGACTGTCTTACTCGTCATAATATTGCCAGTCATCTTCAAAAAATATC  
GATCCCATAGGAAACATTTGCTTGCAAGAGAAGCTGAGGCCGCGAGTTGGAGCCAGAGAAGGCAACTTTACGGTGGTGCA  
GCCGTGGTAGGAGGGGGAGGAGAAAGAGAGATATGACCCCGTGGCCTGCACCAACTATTGGCTTTCTCCTCCTCCTAC  
GATGGCGGCTCCAATGCCTCATCTTTTAGACCCCTACATGTATGGGGTCATCCATCTGTGACCAATCATATATGCACA  
TGTGGCCTAAACATCTAGCGCCTTCGCCTTCTCCACAACATCCATCACCAGCATGGGCTCCTCCTCCTCATCTTCATCCT  
CCGCCACCTTCAGATCCTTCTTTTTGGCATCCACACCATCAACGAGTACCAAATCCTCTTACACCAGGAACCTCCTTACTT  
TCCAGCACCTATAGCACCACGAGGTATCCGGGTGGTTCATCATCCAGTACCTGGCATACCACCCGAGCGCATGCGATGT  
ACAAAGTAGACCACGTTTGAAGTACTGCTCCTCCAACACAACCTCTACCTAAACCTCCTTGTGATTTTCATCCTTCAAAG  
GAGAGCATAGATGCGGCTATTGGAGATGTTTTATCTAAACCATGGCTACCACTTCCCTCGGACTCAAACCTCCGGCTGT  
CGACAGCGTGCTAGGTGAATTACAACGTCAAGGGGTGCCTAAATACCACCAACTTGTGCATAG

>CcGLK1-2 |Locus\_ID=BC332\_34411 |CDS\_len=1344 |strand=-  
ATGCTAGCTGTGTACCTTTGAGTAACACAACGGCAAGAGATGATAACACGATGGAGAGTTTTGCGATTGGAGGTGGAGT  
TGATTTCCCTGATTTTCGTTGGGGAGAATTTACTTGACAGCATTGATTTTGATGACCTATTTGTTGGAATCAACGATGGAG  
AGGTACTGCCAGATTTGGAATGGACACTGAAATACTTGACAGATTTTCAGTTAGTAGTGGCGATGAATCCGATGTGAAT  
AACTATAGCAGTAGTAATAAACTACGTTTATTTCTACTGCTACAAAAAATGTAGAAAGAAAAGATGAAACGGAAAGAGC  
AGCCTCGGATGTAGGTTCCGGTTTAAACGAGCTTAAATCAAGGAGAAGAAATTGTTAGTACTCAAAAAAGTGAAGAATCTA  
CACTACAAGTGAAACAGAATATCACTCCAAAAGAAAGTGATAAAGGCCAAAAGTCATCCAAGAATAATCTTCCAGGCAAG  
AGGAAAGTAAAGGTGGACTGGACGCCAGAATTGCACAGAAGATTTGTACAAGCAGTAGAGCAGCTAGGTGTAGATAAGGC  
AGTCCCATCAAGAATTTTGGAGATCATGGGAATCGACTGTCTTACTCGTCATAATATTGCCAGTCATCTTCAAAAAATATC  
GATCCCATAGGAAACATTTGCTTGCAAGAGAAGCTGAGGCCGCGAGTTGGAGCCAGAGAAGGCAACTTTACGGTGGTGCA  
GCCGTGGTAGGAGGGGGAGGAGAAAGAGAGATATGACCCCGTGGCCTGCACCAACTATTGGCTTTCTCCTCCTCCTAC  
GATGGCGGCTCCAATGCCTCATCTTTTAGACCCCTACATGTATGGGGTCATCCATCTGTGACCAATCATATATGCACA  
TGTGGCCTAAACATCTAGCGCCTTCGCCTTCTCCACAACATCCATCACCAGCATGGGCTCCTCCTCCTCATCTTCATCCT  
CCGCCACCTTCAGATCCTTCTTTTTGGCATCCACACCATCAACGAGTACCAAATCCTCTTACACCAGGAACCTCCTTACTT  
TCCAGCACCTATAGCACCACGAGGTATCCGGGTGGTTCATCATCCAGTACCTGGCATACCACCCGAGCGCATGCGATGT  
ACAAAGTAGACCACGTTTGAAGTACTGCTCCTCCAACACAACCTCTACCTAAACCTCCTTGTGATTTTCATCCTTCAAAG  
GAGAGCATAGATGCGGCTATTGGAGATGTTTTATCTAAACCATGGCTACCACTTCCCTCGGACTCAAACCTCCGGCTGT  
CGACAGCGTGCTAGGTGAATTACAACGTCAAGGGGTGCCTAAATACCACCAACTTGTGCATAG

>CcGLK1-3 |Locus\_ID=BC332\_34315 |CDS\_len=1344 |strand=+  
ATGCTAGCTGTGTACCTTTGAGTAACACAACGGCAAGAGATGATAACACGATGGAGAGTTTTGCGATTGGAGGTGGAGT  
TGATTTCCCTGATTTTCGTTGGGGAGAATTTACTTGACAGCATTGATTTTGATGACCTATTTGTTGGAATCAACGATGGAG  
AGGTACTGCCAGATTTGGAATGGACACTGAAATACTTGACAGATTTTCAGTTAGTAGTGGCGATGAATCCGATGTGAAT  
AACTATAGCAGTAGTAATAAACTACGTTTATTTCTACTGCTACAAAAAATGTAGAAAGAAAAGATGAAACGGAAAGAGC  
AGCCTCGGATGTAGGTTCCGGTTTAAACGAGCTTAAATCAAGGAGAAGAAATTGTTAGTACTCAAAAAAGTGAAGAATCTA  
CACTACAAGTGAAACAGAATATCACTCCAAAAGAAAGTGATAAAGGCCAAAAGTCATCCAAGAATAATCTTCCAGGCAAG  
AGGAAAGTAAAGGTGGACTGGACGCCAGAATTGCACAGAAGATTTGTACAAGCAGTAGAGCAGCTAGGTGTAGATAAGGC  
AGTCCCATCAAGAATTTTGGAGATCATGGGAATCGACTGTCTTACTCGTCATAATATTGCCAGTCATCTTCAAAAAATATC  
GATCCCATAGGAAACATTTGCTTGCAAGAGAAGCTGAGGCCGCGAGTTGGAGCCAGAGAAGGCAACTTTACGGTGGTGCA  
GCCGTGGTAGGAGGGGGAGGAGAAAGAGAGATATGACCCCGTGGCCTGCACCAACTATTGGCTTTCTCCTCCTCCTAC  
GATGGCGGCTCCAATGCCTCATCTTTTAGACCCCTACATGTATGGGGTCATCCATCTGTGACCAATCATATATGCACA  
TGTGGCCTAAACATCTAGCGCCTTCGCCTTCTCCACAACATCCATCACCAGCATGGGCTCCTCCTCCTCATCTTCATCCT  
CCGCCACCTTCAGATCCTTCTTTTTGGCATCCACACCATCAACGAGTACCAAATCCTCTTACACCAGGAACCTCCTTACTT  
TCCAGCACCTATAGCACCACGAGGTATCCGGGTGGTTCATCATCCAGTACCTGGCATACCACCCGAGCGCATGCGATGT  
ACAAAGTAGACCACGTTTGAAGTACTGCTCCTCCAACACAACCTCTACCTAAACCTCCTTGTGATTTTCATCCTTCAAAG  
GAGAGCATAGATGCGGCTATTGGAGATGTTTTATCTAAACCATGGCTACCACTTCCCTCGGACTCAAACCTCCGGCTGT  
CGACAGCGTGCTAGGTGAATTACAACGTCAAGGGGTGCCTAAATACCACCAACTTGTGCATAG

>CcGLK1-4 |Locus\_ID=BC332\_34226 |CDS\_len=1344 |strand=+  
ATGCTAGCTGTGTACCTTTGAGTAACACAACGGCAAGAGATGATAACACGATGGAGAGTTTTGCGATTGGAGGTGGAGT  
TGATTTCCCTGATTTTCGTTGGGGAGAATTTACTTGACAGCATTGATTTTGATGACCTATTTGTTGGAATCAACGATGGAG  
AGGTACTGCCAGATTTGGAATGGACACTGAAATACTTGACAGATTTTCAGTTAGTAGTGGCGATGAATCCGATGTGAAT  
AACTATAGCAGTAGTAATAAACTACGTTTATTTCTACTGCTACAAAAAATGTAGAAAGAAAAGATGAAACGGAAAGAGC

AGCCTCGGATGTAGGTTTCGGGTTTAAACGAGCTTAAATCAAGGAGAAGAAATTGTTAGTACTCAAAAAAGTGAAGAATCTA  
CACTACAAGTGAAACAGAATATCACTCCAAAAGAAAGTGATAAAGGCCAAAAGTCATCCAAGAATAATCTTCAGGCAAG  
AGGAAAGTAAAGGTGGACTGGACGCCAGAATTGCACAGAAGATTTGTACAAGCAGTAGAGCAGCTAGGTGTAGATAAGGC  
AGTCCCATCAAGAATTTTGGAGATCATGGGAATCGACTGTCTTACTCGTCATAATATTGCCAGTCATCTTCAAAAATATC  
GATCCCATAGGAAACATTTGCTTGAAGAGAAGCTGAGGCCGCGAGTTGGAGCCAGAGAAGGCAACTTTACGGTGGTGCA  
GCCGTGGTAGGAGGGGGAGGAGGAAAGAGAGATATGACCCCGTGGCCTGCACCAACTATTGGCTTTCCTCCTCCTCCTAC  
GATGGCGGCTCCAATGCCTCATCATTTTAGACCCCTACATGTATGGGGTCATCCATCTGTGACCAATCATATATGCACA  
TGTGGCCTAAACATCTAGCGCCTTCGCCTTCTCCACAACATCCATCACCAGCATGGGCTCCTCCTCCTCATCTTCATCCT  
CCGCCACCTTCAGATCCTTCTTTTTGGCATCCACACCATCAACGAGTACCAAATCCTCTTACACCAGGAACCTCCTTACTT  
TCCAGCACCTATAGCACCACGAGGTATCCGGGTGGTTCATCATCCAGTACCTGGCATACCACCCGACGCGCATGCGATGT  
ACAAAGTAGACCAGTTTGAAGTACTGCTCCTCCAACACAACCTCTACCTAAACCTCCTTGTGATTTTTCATCCTTCAAAG  
GAGAGCATAGATGCGGCTATTGGAGATGTTTTATCTAAACCATGGCTACCACTTCCCCTCGGACTCAAACCTCCGGCTGT  
CGACAGCGTGCTAGGTGAATTACAACGTCAAGGGTGCCTAAAATACCACCAACTTGTGCATAG

>CcGLK2 |Locus\_ID=BC332\_25081 |CDS\_len=936 |strand=-  
ATGCTTGTGTATCTACACCATTGAGCTACAAAATGAAAGGGGAAATTATGATTTATTTCAAGATTTTCCTGATGGGAA  
TTTAATCGACACCATTGATTTTGTGACTTTTTTGGAGGAATCAACGATGGAGATTTGCTGCAAAATTTGAAAATCCTTG  
ATGAATTTGATATTAGCAAGAATAATACTACTAATCTAAATGTGAAAACAAAGTCAAAGGAAAATGATAAATCCAAG  
AAATCGTCAAGCCAAATCAAGAATCCTGAAGGGAAGAAGAAGGTGAAGGTTGATTGGACTCCAGAGCTGCACAGGAGATT  
TGTAAGCAGTAGAGAAATTAGGTGTTGATAAAGCAGTTCATCAAGAATTTTAGAGCTTATGGCTACTGATGGTCTCA  
CTAGACATCACATTGCTAGCCATCTTCAAAAATATCGAGCTCATCGAAAACATTTATTAGCAAGGGAAGCTGAGGCAGCA  
AGCTGGACCCAAAGGAAGCAAATGTATGGTGGAGCCACCGCATCGGAGGCGGAGGGAAGAGAGTTATAATGAACCCATG  
GTCTGCACCACCAACCATGGGTTTTCCACCCATGGCTCATCATATTAGACCTTACATGTTTGGGGGCATCCATATGTAA  
ATAATTCTTTTTGGCATCCACATTATCGAGTACCAAATCTCTTGCACCAGGCACTCCTTGCTTTCCTTACCAACGAGA  
TTTGCAGCACCTCTTATGGTCCCTGGCGTTCCACCACCCATTGCATCAGGACAACTCCACATTTGCATCTTACAAAAGA  
GAGCATAGATGCAGCAATTGAAGATGTTTTATCAAAGCCACAAACGCCACTTCTATAGGATTGAAACCTCCATCAATTG  
ATAGTGTGTTGAATGAATTACAATGTCAAGGGATTACAAAATACCTCCAACCTGA

>CcHH01 |Locus\_ID=BC332\_05708 |CDS\_len=1350 |strand=-  
ATGGGTTCAAATCTAGAGAAATGGACATAGATTTGAACCTTATTTATGTTCCAAAAATAATTTAGATGTTTTAACTGA  
AATTTCTGTATGGATGACATCTCCAAGAAATTAATAAAGCTCAATCAATTTATTATTGCTTTAGAAGAAGAGCTCAGAA  
AAATCGAAGCTTTCAAACCTATTGAAAGATTAAAGGAGGAAGCTTTACAGTATAAAGGGAAAGATAAAAAGCCTGTGATG  
GAGAAATTCATCTCACTGAAGAAAGGTAATTCTGATGAAAGTGGAAGGGTAAAAAGTCAAATGATCTTAATGATAAGAA  
AACTGGATGAGTTCGGCTCAGCTGTGGAGCACTCCAGTTCAGTATGAACAAAGCTATGATCTTGAAAAGCAAGGACCTT  
TTTTACACCTAAATCTGGTGGGGTAGAAGAGAAAAACAAAGAGAAGGAATACCAGTTAGGGGTACATAAATTGAATAGT  
GATAGAGGGGCATTTTTGCCATTTCAAGGACAACTTTGAAGGATGGGAAGAATGGTTTGCCAGTTAAAGATTTATCTCT  
GTGTATGGCAGTAACAGTGGCTGAAGGGCAAAAAGGTCAAATCCAATTGATTTGAGTGTAAGAAATGATAATGGCACAT  
CAAATGGGTGTAGTTTTTACAGGATAAATCACAACAGAGGAAACAGAGGCGTTGTTGGTCACCAGAATTGCATCGTAGG  
TTTGTGATGCTCTTCATCAGCTTGGAGGTGCCCAAGTGGCTACACCAAAACAGATCAGAGATATCATGCAAGTTGATGG  
CCTGACCAATGATGAAGTGAAAAGCCATTTACAGAAGTATAGGCTTCATGTGCGACGAGTCCAGTATCGGGTGTTCGT  
GGTCTAACACGGATGAAATAGGAGAATCATCGAAGACAAATGGCACACAATCTGGTTCCTTGAAGGTCTCTTCATTTT  
ACTGGTTCAGGAAAAATGACAAGCGATAGTCAAATGCAAGATGCAGCAACGTCTATGGGGGCACTAATATTGCCACATC  
AAGTCGCACAAATGCTCCGCCTACAATGGCATGACGGAAGCCGAAAAATTTACGGGCATTGACTTTAAACGATGGC  
AACAAAAGATGTTCTTTTACCCTACCACCTTTGTGTCTGCAACGGTTCACTAGCGAAGACGCTCCTGAGGTGCCCGAGGGA  
ACCTCGGACAAAGAGCGTTTTCGTAATTGTAGAAGCTTGAAACATTCAAACCTTCTTTGCAAGGAATTATTTCTCAGTGG  
TCTCCAAGACGACCTCTACAATTTTTACAGTGGAACCTAAGACATCGAAGGAATTGTGGGGGGCACTTGA

>CcKAN1 |Locus\_ID=BC332\_00869 |CDS\_len=873 |strand=-  
ATGGAACCTATTCCCAGCACAAACCAGACTTATCCCTAAAAATTAGCCACCAAACATCAAGCCCTCCTCATCTTCAACTAA  
TTGGAAGAGGAAAACCTACAAGTAGTACTGAAGACGAGAATTTGGATTTAGGGTTTTGGAAAAGAGCTATGGTGGAATCAA  
CAAATTTCTATGTTGAATAATAATAGTAACACTTCTTCTGTTTTGAGCTTTCTTTATCCAATAATCCAACCTAAACCTAAT  
AATTATTCTTGTGACCCTAATTCTTCACATCATCTCCAAAATTACATTTTGAACAAAATCAAAGGATAATAACCACCCG  
AGAGCTTGGTTTTCTTGATGCAACCTATTAGAGGAATTCAGTGTACCATCAAAGCCCTTTGATAATACCATTACTACAT  
TTCCTATACCGTCTTCTTCTAATTGTTCTATTCTTAACAATATTAATAACAACAACACAATTACTTCTTGTGCCTCTACT  
AGTCCTAATTTTCAACAAGGTGGGTTTTCTGAGATCAAGATTTTATTCAAGATTTCCAGGCAAACGGAGCACGAGGGCTCC  
CAGAATGCGATGGACAAGTACTCTCCATGCTCGTTTTGTTACGCTGTTGAGCTCTTAGGTGGACATGAAAGAGCAACAC  
CAAAGTCAGTTCTTGAGCTTATGGATGTCAAAGATCTCACTTTAGCACATGTCAAATCCCATTTACAGATGTACCGGACA  
GTGAAGACAACCTGATAGAGCAGCTTCTTCAGGCCAATCAGATACATCAGAGGAATTGATTGTTGAAACTGAAGAATATTT  
AAGAAAGTCTGAAATAACAATTCAACAAGGTAGACGGAATATTATCAAATAATGATTTTTCAGGGCCTTTAA

>CcKAN2 |Locus\_ID=BC332\_15978 |CDS\_len=1257 |strand=+  
ATGGAGCTATTCCCAGCACAAACCAGACTTATCTTTACAAATCAGTCCACCAAATAGCAAAGCATCATCAACAGCTTGGAA

GTCTAGTATGGTCACTAATAATACTAATAGTACTACTAATCAAGATGAGATGGATTTACTCTTCTGGAAAAGAGCTTTGG  
AATCAAGAACTCAAAATCTGATAATAACAGCAATAATTCTTCTTCTTTTGAACCTTCCTTATCCAATATTCCAAAT  
AAACCTTCTCCTCCTCATCACTTATTAACACTACTTCCCATTTCATCCCACCATCCAAAACACTCACACCAATTTTCAT  
CCACCAATCTTTACAACAAAATCAAGAACTTAGTTTTCTTAAGACCCATAAGAGGAATTCAGTGTACCATCAAAACCTC  
CTCCTCTTCTTCTCCTTCTATTCCCGTTTTCTCATCATAACTACCCAATATTTGCTCACCAAACCTTTTGACAATACTAGT  
ACTACTGCAGCTACATTACCTATACATTCTTCTGGTTGTTGTATTAGTAGTTTTAATAACAATATTAGTAACAAAACCTAT  
CTCTAATTCCTCACCAATTATTCCTTTTCATCAATCCCATCATCAAGCTGGCCTAATGCGATCGAGATTTTTGTCAAGGT  
TTCCAGCCAAACGTACCATGAGAGCTCCACGGATGCGCTGGACTAGTAGTCTTCATGCCAGATTTGTTTCATGCTGTGAG  
CTCTTGGGTGGCCATGAAAGAGCAACTCCCAAGTCGGTTCTTGAGCTAATGGATGTGAAAGATCTCACTTTGGCACATGT  
TAAATCCCATTTACAGATGTATCGCACGGTCAAGACTACCGACAGAGCAGCAGTTCCCGCTTCTTCAGGCCAATCGGAGG  
TATTCGATAATGGGTCTTCTGGGGATAATTGAGAGGATTTAATGCCTGACATGGAAGATTATCATGGTCTTTGGAGCAACTCTTCAAG  
CAGGGAAAGTTGGCAGCTGCATGGCAAACATGGTGACTACCTGGGAACATGGCACCTCTTGAGAGAACAGAGAAAAATC  
AGCATAAAGACATGGAAGCAAATGCAAAATGCTTAAGCTATGACAGAATATCAGGAGAAGTGAGCTCATCAAGCATAACA  
GAGACAAGTCCAAAGAAGCCTAATCTTGAATTTACTTTGGGAAGGCCTTCAGAGTAA

>CcKAN3 |Locus\_ID=BC332\_11999 |CDS\_len=924 |strand=-  
ATGAGGGACACAGTACTTTCAATGGTACCTGATCTTTCTTTACAGATCAGCTTACCACCATGTATTTCAAAAAGTGATCA  
GTTCAAAGAAGCTATACGCTTCGACTCCACAACAGATTGAGGTAGCAGTGCTAGTGTGGGGAGCGATTTGAGCCACGAAA  
ATAATGGATATTTTACCTAGACAAAATTAACCGTTTAACTTCTCCTTAGTTCTTCTTATGAGCCAACCTGAGTCTA  
GGGTTTCGGACAGGTACCAACAGGTACAAACCATCAGTATCAGCATTATCAGCCACAAATATACGGTCGAGATTTCAAGAG  
AAGTTCAAGAATGAATATTAGTGGGGTGAAGAAGACCGCTAGAGCTCCTAGAATGAGATGGACTTCAACTCTTCATGCCC  
ATTTTGTTCATGCCGTTTCAGCTCCTTGGTGGACATGAACGAGCAACACCAAAATCCGTGCTAGAGTTGATGAATGTGAAG  
GATCTAACTTTAGCTCATGTGAAGAGTCACTTACAGATGTATAGAACAGTGAAGAGCACTGACAAAGCCACAGCTAAAGG  
GCAGGGAGAAAATGATTTGTGAACCAACACAAGGGGATTAATAATATTGGTGAATATGAAAAATCTGGTGAAGAGATTG  
ATGCAGTATCACAAATCAAGCACAAATGCCACAAAATATGGCTCATAATATGAGGGATCCATCGTCATTTCATGCCTGACCAG  
ACAAATGCATGGAGCCACTCAAATAGAGAAAGACCATTTGCTAATTATCCTCACATCTACTCAAATATGGGCGGAATTGA  
GACAGCCAATAACTCATCTTCTAATGATACATTGGTTAATCTTGAATTTACACTAGGAAGACCAAGCTGGAAGAAATGGAAC  
AAGCTGGATCATCATCAAATGATTTGACTCTTCTCAAGTGCTAA

>CcKAN5 |Locus\_ID=BC332\_19106 |CDS\_len=336 |strand=+  
ATGCCAGAAAGTAGCAAGAAGCACAAGGGAGAAACATCTGAAAAAGTTGGGCCAAGTCATGACTTGAACAGAAAAACCAAG  
ATTTAAGTGGACAGTGGAACTCCATGAACACTTTGTAAAGCTGTCAATGAATTAGGAGGTCCTTATGAAGCAACACCGA  
AGAATATTGTGAAACTAATGGATGATGAAGATATCACACCAGACCATATCAAAAGCCATCTCCAGATATATCAAGGTAGA  
AGCAGATCTATTAAGGTCCAGGGAGTGTATGTCATCCGCAAGTTTTGATTAAGGCCCGAGGAGCGTTATGCCACCCGCA  
AGTTTCGATCGATTGA

>CcKAN6 |Locus\_ID=BC332\_18917 |CDS\_len=753 |strand=+  
ATGATGGAATATTTCTCAATGATGAAAAAGAGGAGTTCTAATAAAATAGGGGTTAGACAATACAAGAAATCATCAGTTCC  
TCGTCTTAGGTGGACACCTGAACCTTCATGAACCTTTCATTGAAGCTGTTCAACTTCTTGGAGGAGGACATAAAGCAACTC  
CAAAGAGAATTCAACAGATGATGGAAGTAAAGGGATTGACGATTTCTCATGTTAAAAGCCATCTCCAGATGTACAGAAAC  
TTGAAGGAACGAGCCAGCCCAAATATTGTAAGCTCTGTCAACAACCTTTCTTGAAGAGAGGCCACAGTTCTCTTGGTCTTC  
CCCACGGCATGTGTGTGAAACATTAGAACATCGTCCTTCAAAGAGCAGCAATCAGATAAACCCCTGGAAGTGATCAATCCC  
CTTACAAAGCAAGAGATCGATGCACACAGCGATCAAATTCGCGGAAAATATATATATTGCTGTGACTACCAGGAAGCACAA  
GGAAGTTTTAAGTAGTGGAATGACAAAGGAAGAAGAAGAAAGTGGCGGTCCAACAAGTGAATTTGTGAGTTTTCCAGAGGC  
AGATGGCGATTATAAAAGGGAGAACAAATATTTGGCCTTTGGATGATTGGGTAGCTCGGTGTACTAAAGGTTTCAGCTGAAT  
ATTCCCAATCTGATTCCTCCACAAAGTTTCTAGACCAGCAGGTTTTGCAATCTCAAAGGACAATTCTCACATTAACCTA  
GATTTATCTATCTCTTCATATTTCTATTGTAA

>CcKUA1 |Locus\_ID=BC332\_00616 |CDS\_len=1032 |strand=-  
ATGACCCGAAGATGTTACATTGACGTAATAATGGGCATAACTCAAGAAGTTGTCCTAATAGAGGTGTTAAGTTGTTTGG  
AGTTAGATTGACTGATGGGTTGATTAGAAAAAGTGCTAGTATGGGTAATTTGACTCATTTTGGTGGTGGTGGAGGGG  
GAGGTGGTAGTAGTACTGGTCTAAATGGTGTGTTTCATGATTCACCTGGTGATACACCTGATCATCCTGCTGTTGGTGGT  
GCTGCTGCTGATGGTTATGGTTCGGAAGATTTTGTGCTGTTCTTCTTCTAGCCGTGAAAGGAAGAAAGGGGTTCCCTG  
GACTGAGGAGGAGCATAGGATGTTTCTACTTGGTTTTGCAAAAGCTTGGTAAAGGTGATTGGCGTGGAATTGCTCGTAACT  
ATGTAATTACTAGAACACCCACCCAGGTTGCAAGCCACGCCAGAAATATTTTATTAGGCAAAGCAATATGTCAAGGAGA  
AAAAGACGCTCCAGTCTGTTTGATATTGTTGCTGATGAATCAGGGGACACTCCAATGGTATCAAGGGATTTCTCGCTGA  
AGATCCGCAAGCCGAGATGCAAAGCAACAATCCGCTGCCTCTACTCTGTTGTGGATGAAGAATGTGAATCAATGGGTT  
CAGCAGCTTCTGCCAACTCCATCGATGGGGAACATTCTCTTCTATACCTGAGAGTTTCACAGTACCCTCATCCACTCGTA  
TATCCTGCTTATGTTGCTCCATTTTTTCCAATGCCTTATCCATGTTGGCCAGGTTACACTGCAGAGCCAGCAAAGGCAGA  
GACCCATGAAGTTCTGAAGCCAACAGCGGTTTCATTCAAAGAGTCCAATTAATGTTGATGAGCTGGTTGGTATGTCAAAGC  
TAAGTTTAGGTGAATCCATTGGTAATGCCAAGCCACCTTCTCTTCTACTAAAGCTGGTAGAAGGCTCCTCCAGGCAGTCA

>CkUA2 |Locus\_ID=BC332\_30669 |CDS\_len=1143 |strand=+  
ATGACTCGGCGGTGTTCCCATTTGCAACAACAATGGACACAATTCCCGAACTTGCCCCACCAGAGGCGGCGGCGGCGGTGC  
CACCAGCAGTATCGGTGGTGGCTCTGCCATCGGTGGTGGAGGTGCTGCGGCTGTTTGGTGTGAGGCTTACAGATGGATCGA  
TAATGAAGAAAAGTGCTAGCATGGGGAATCTATCTTCCCTTCACTATCATTCTTCTTCTTCCGCAGCTGCTTCGCCTAAT  
CATCCTGGTTCTCCTTCTTCAGATGTTCTTCTGTAAGCTGTTCAATTTGACTGATGGTTATCTCTCTGATGATCCTGTTCA  
TGCTTCTTGTCTGCTAATCGCAGAATTGAAAGGAAAAAAGGTGTTCTTGGACAGAGGAAGAGCACCGACTTTTCTTGA  
TCGGTCTACAAAAATTGGGCAAAGGAGATTGGCGGGGTATATCACGAACTTTGTGACATCAAGGACTCCTACCCAAGTA  
GCTAGCCATGCCCAGAAGTATTTTATCCGGCAGAGTAGTGCTACTCGGAGAAAGAGAAGATCCAGTCTTTTGTGACATTGT  
TGCTGATACGGCCGCTGATGCTTCCCATCCAATTCTGATGAACAATTTATGCTCCACCTAGAGCAATGGAAAGTGATA  
AGGAACAGTTAGCACCTTCTGCAACAAAAGCAATAGAAACTGATTTTGCAGATTCACTCCCTTCTTGGATCTTTCTCTC  
AAGTCAGATTTTGAATCCATGGAAACCGTTCCAAGTGAACCTGTTCAAGAAACGAAACCAAATACCGCAACCAGCGAGAT  
TCCTCCAGCATTTCCAGCATTCTTCCCAGCTTACATTCCAGTTCCTTATCCCTTCTGGCCATCAAATGCAATTCCTGTGC  
CTGAAGATAGGGGACCAGAACCATCCCATCATCAGATCCTCAAGCCAATTCCAACCGTCCCCAAAGAACCTGTGAATGTA  
GATGAACTAGTGGGAATGTCCAGCTCACTTTAGCAGAAGCTGGTTCTGGCCATTTTGTGACCTTCACCACTCTCCCTTAA  
GTTAACAGCAGAACCGTCAAGACAATCAGCTTTTCATGCAAGCACACCAGGCAAAAGCTCAGAGATTACTAAGGGTGAAA  
CTGCTCTATTCAAGCGCTATAA

>CcKUA4 |Locus\_ID=BC332\_15336 |CDS\_len=828 |strand=+  
ATGGGGAGCATGACGAAAGATGCCAGGAAGTGCTCACATTGTGGGCACAATTCAAGAACATGTAATTCGAAAGGAGTTGG  
CGGAATCAAATTATTTGGAGTTCGGATCGACGATAATTATAATAGTAACAGTAACAATAATAATCATGGTCATGGTAACA  
TAAAAATTAAGATGCGGAAGATAGGTGATTATGAATCCATAAGAAGGAGCAAAAGTTTAGGCAATCTAGAACATGCCGCG  
AATTATGACAACATCGGTGGCGTTGAGGCGGGATATCTTTCTGATGGGCCCATTCATTCTCTCAGACATAGAAAAAAGGG  
GACATCATGGACTGAGGAAGAGCACCGGTGTTTTTAATTGGCTTAGAAAAGCTTAGAAAAGGTGATTGGAGAGGAATAT  
CAAAACATTATGTGCCTTCAGGACGCCAACACAAGTAGCTAGTCATGCTCAAAAATATTTTCATTAGAATGTCCTCAATT  
GATAAGAAGAAACGTCGGCCTAGTGTTTTTGATGTGTATCTAAAAGATCTGAATCCACAGATTCCCTCCAAGTCCTCACC  
TTCTGTCTCAAACATGGTTTCTGAAGTCTCTAAGGATGCAAGTTCCCGGGTGGTGCAACTGTTTGACACTTGCCAAATTA  
AAGGACAGGCTAGCAAAGGATGTTCTGTTGCAACTCGTGAAAGGCCTCCACTTTCACCATCACCAATTAGTAGACCTTTT  
GGAGTCCGTAACCTACGCCATGCTTACATGATGGGAGCTCCTCCGAATATCCATAGCGTTACACCAGCCAAAGCAGG  
ACCAACAATCTCATGGATTCTCCCGTAG

>CcMYB1R-2 |Locus\_ID=BC332\_16646 |CDS\_len=888 |strand=+  
ATGTCCAGCGCGTGCGGTGATGAATCATCGGCGACGGAAGTTACCGGCGCCGGTGAAATCATGTTGTTTGGCGTGAGAGT  
GAAAGTCGATCCTATGAGGAAGAGCGTCAGTCTCAACAATCTCTCACAGTACGAACAGCCGAATATTAACAACCTCCGGCG  
GTGATAGCAAAAATGAATCGTTGAAAGTGGCGGCTGATGAAGGTTATGCCTCTGCAGATGATGCTGTTCAACATCAGTCT  
AACTGTGGACGTGAGCGTAAGCGAGGAGTTCCTTGACGAGGAAGAGCACAAGTTATTCTTCTAGGATTGCAGAAAGT  
GGGTAAAGGAGACTGGAGAGGAATCTCTAGAAACTTCGTAAGACTCGTACGCCGACGCAGGTTGCAAGTCATGCTCAGA

AGTATTTTCTCCGTCGAAGCAACCTAAACCGCCGTCGTCGCCGATCTAGCCTCTTTGATATCACCACTGACTCGGTATCA  
GCAATGCCAAAAGTAGAAGGGGAAAATAAGCAAGAAATCCCAGTTCTAGCACCAGCAACATTGCCTACTGTAGAACTAC  
CAAAACAAATGCATTTCCGGTGGCACCAGCTGTTGGTCCTATCATGATACCAGCGCAGATTGATATGTCAAGAGATAGTC  
CAACGCTGTTGCGACGCAATCATGGGAATTCATCAATGCTGGTTGGTGTCTGTTTCTATGTTTTACTGCCCAATCCATCA  
CCAGTGATTGACCTTAATGCGAACCAGAACACAACAATTGAGCCCTCGCCTTTGTCTACTGAGATTATCATTGTCACTTGA  
TCAGGGACAAGCATCATCTACTAGACACCTGGGATATCAAGTCATGTCAAGCTTCAGTAATGGAGAAAGCATCATCAGTG  
TGGCATGA

>CcMYBC1 |Locus\_ID=BC332\_26707 |CDS\_len=825 |strand=-  
ATGAGGGAAGAAGATTCCAATTGGTTTGCTAAATGGGAAGAAGAATTACCATCTCCAAAGGAAGTATGCCTTTATCCCA  
AACCTTAATTACTCCTAGTTTAGCCATAGCTTTTCATATTCAAAACCCCAATACCCCAAATCCCAGAATGTCACCACTAG  
TTCATACTCCTCCATCAGCCGAGTTTGAGTCTGAAGTCTGGCTGAGTTGGGTGGCAGGGCAGGTTTCATCAGGTGTTGGTCCT  
GATGAACCTGCCGAACCCGAAAAGGGCTAGACTTGTGTGGACCCACAGCTACACAAGAGGTTTGTGGATGCAGTTGC  
ACAATTGGGGATCAAGAATGCTGTCCCAAAGACTATAATGCAGTTGATGAGTGTAGATGGCTTAACTCGCGAAAATGTTG  
CTAGTCATTTGCAAAAATATAGGCTTTATTTGAAGCGTATGCAGGGTTTTTCTAGTAGTAGTATGTCCGGTGCAGGGGTG  
GATCCCGCAACAGATCATCTGTTTGCGAGTTCACCCGTGCCTGCACATTTTTTGCATCCAGGGAGGGGAAATTCTGAACA  
TTATATGCCATTTGTGCCAGTGGCTGCAATTGTTGGACATGCTCCACAACCTTCAGCAGCAGCATAGGCATTTGGGGCCAT  
CGCCAAATGGGCAATTTGAGGTTCCATTTTTGTCTCGCCAGTCGCAGCAGCAGCCGGTTCAGAGAATGGGGACATCAGTT  
CATAGTAGTAGTCCAGTGTTCCTTTATGTAGAGGGTTGGAATCAGCTACAACCTGCTAATGGGAGAAAGGTTCTTAC  
TTTGTTCCTCAACTGGGGATGATTGA

>CcMYBC2 |Locus\_ID=BC332\_27055 |CDS\_len=873 |strand=-  
ATGAGGGAAGAAGATTCAAATTGGTTTGCTAAATGGGAAGAAGAATTGCCTAAACCAGAAGAGTTAATGCCTTTATCACA  
AACCCCTTATAACTCCGGATCTTGCCATAGCTTTTGATATTCCAAACCCCACTAGTCCAAATCCTCAAAGTAAACAGCAGC  
AGACTCCTCTTGTTCATCTTCTCAGCCAAATTCATCAGCTGAATTTGAGTCTGCTGAAGTGAATGGGACAGGAGGTGGA  
GATGAACCAGCAAGGACGTTAAAAAGGCCGCGTCTTGTGTGGACACCACAGCTACATAAGAGGTTTGTGGATGCAGTTGC  
TCATTTGGGGATCAAGAATGCTGTCCCAAAGACTATAATGCAACTGATGAGTGTAGATGGATTAACGCGCGAAAATGTTG  
CTAGTCATTTACAGAAGTATAGGCTTTATTTGAAACGTATGCAAGGTCTTTCGAACAGTGAAGTGGTGGGAGTAATGCT  
CAGTCTTTATCAGGAGCAGGTGTTGATCCAGCAATGGACAATTTGTTTGCAAGTTCACCTGTTCCGGGCACATTTTCTGCA  
CCCGGGGAGAGGTAATTCTGACCATTTTATGCCGTTTGTGCCAGTGGCACCTATGCAGCATCATCATATGGGAGTGG  
TTGTTGGACACCATCCACAAGTTCAACAGCAGTATAGGCAATTTGGGTCAACGGCGAATGGACATTTTGGACACCTTTT  
TTGTCTAGGCAATCACAGCAGCAGGTTTCAGAGAATGGGAACATCAGTGCATAATGGTAGTCCTGTGATGTCATCTTATGT  
GGAGGATGTGGATTACGCCACCGCCGCGAATGGGAGGAAGGTACTTACACTGTTTCCAACAGGGGAAGATTGA

>CcMYBR1 |Locus\_ID=BC332\_13048 |CDS\_len=903 |strand=+  
ATGGGTAAATTGTGGAAGAAATGGAGGAGTAAGGCAATACATAAGATCAAAAGTTCCACGTTTGAGATGGACACCTGATCT  
TCATCATTGTTTTGTTTCATGCTATTGAAAACTTGGTGGCCAAGACAAGGCTACTCCTAAGCTTGTTCTACAGATGATGG  
ATGTGAGAGGACTTACTATTTACATGTGAAAAGCCACCTTCAGATGTACAGAAGCATGAAGAATGATGTCAACAGGCAA  
GCAGAGAGAATGAGCACTCAACAAAGAAAACATCAGTCCTTAGAAGATCATGATTGTATTATCAAAAACAAGAAGGGGT  
GTGTGTTGAGCAACAAAAGCTATTGGTTTACCAACATTATCCATCTTTTAGCAGCAGCCCCATGGAGAGATCAGATTCTA  
CACAATACTTTAACAGTATTCTACCCACAAAAGAGCTAGAATAGAGGTGTGCAGCAACCAGAGAATACGTGAAGCAGTG  
TCCAATCAGTACAACAGTAGAAATGATTATATAGAGAAAAATGGTGTAAAAGGAGAGAGGGCTGGTTTTCATATGGCAACA  
GAATAGTGAAACAAACAGACAAACAGCAGATCCATTGTGCAATAGTAGTAGTACTACTACTCTTTTCTTTAACCCCTCTTA  
AGAGAAGCAATGAAATTCAAGAATCTGAATTTTTCAAGGTGACGAGACACAAGATTCAAATGCAGGAGGCGGAGGAGGA  
GGAGAAGACAATGGCGAATGTGGATTATCGTTATCTCTCATTGTCATCGTCTTCTACTCAGAGAAGCAATGCATCGTC  
CATAATAAGTGAAATTGGTGAACAATTTCTTCATATTCAGCAGGCTCCAATGTGAATCAACAGAGTGTTAGTGTTGATC  
TTAATCTATCTATTGCCTTATGA

>CcMYBR10 |Locus\_ID=BC332\_32618 |CDS\_len=1887 |strand=-  
ATGGACCAAGGTGATGAGAAGGAGGATATGCTCCGGAAGCTGGAGAAGAAGTCCAAGAAAAGTAATAAGAATGCTGCCAC  
CAGCGGTCTTGGAGGAGAGAGTGATGGGTGTGAAGTTAAGAAAAAGAAAAAAGAAAGGTGGAGAACATCCTGGAAAGT  
GCAACAAAGACAATGATGAAGATGTTGTGAAGTATATTGAACGAAAGAAAAATAATAAGCTAAAGAAAAGCTGCTTGAAT  
GAACCACCTTTAGACTTCAAATTAGTGCTCCTGCAAGTGCAAGTGAATGCGGGACAGTGAAAAAGTGGTTGAGACCCT  
TGGTGAAATCTCTAGTGGAGACGTTGTGGACGAGATTAGGAGGAAGAAGAAATCCAAGAAAAACATCAAGACTACCAATG  
TTGTAGGAGTGGCAACACTGATATTGAAGCTAAGACTGATGATTGTGACCTCAAGAGAAAGAAAGAAAGAAACATGGA  
AAACATTCTGAGAAGTTTAAATGAAGACAGCGATGAGGTTGCTTTGAGAATTGTTGAAGGAAAGAAAGAGTAGGAAGTTGAA  
GAAAAGCCGCGTGGCTGAGCAGGAGAAAATGCATGATACTGAGGATGTACAGGAAGATATTGTTGCTGAAGTCGACGAAG  
GTGATATTTCTTCGCCTATCAAGATTGAAGAAAAAACAGAACAGACAATGGGAATATTAAGAGAGGAAAAAGGTAAAA  
TCAGGACATAGCTCTGAAGATCCTACGCATGAGATTGAAGAAAAAGCAGAACAGACAATGGGAATATTAAGAGAGGAA  
AAAGGTAATAATCAGGACACAGCTCTGAAGATCCTACGCATGAGATTGAAGAAAGAAACAGAACAGACAATGGCAATATCA  
AAAAGAAAGAAAAAGGTAATAATCAGGACACAGCTCTGAAGATCCTACGCATGAGAAGAGTGCAAGAAAGTGAGATTTTCT  
GGTCATGTTGAGATTTTCCCTTCTTCTGATGATCCAAGTATGAGAAGCACGAGATAGAGGATGAAAATTTACTGCGTGG

CAAGCGATTCTCAAAGCTAGAAGATGAAATTGTGAAAGAGGCTGTTCTATAAATACGTAGATTTTCATAACTTGGGCGAAG  
AAGGGCTGAAAAAGATTTTAAATTCTAGATCTTATCCTGAAATAAGGGGTTGCTGGAAAGAAATAGGGAGTGCTATACCA  
TACAGGCCTTATACTGCAGTTTATTATCGTGCACAGATCTTGTTCGAAGGAGTGAATCACGTAAATGGACTGAAGAAGA  
GTATGAAATTGTACGAAAATTCAGAAAGAGCATGGGAACAATTGGAAGGTCTTAGCTGATGAACCTGGAAAAACATCGGT  
TTCATGTGAAGGATACATGGCGAAGGATAAAACGGCCAAATCAGAATAAAGGACAATGGACTCAGGAGGAGTACCAGTCT  
TTGTTTGAATTTAGTAAACACCGATCTGAGACTGAGGCTTTCTGAAGAGAAGAGATCTAAGTATGGGATGTTACGGGATAA  
TATTGCATGGACTGCCATAAGTGACAAATTGTCCACGAGAAGTGAAGGCAAATTGCTGCTTGAAATGGTATGATCAATTAA  
CATCACCCATGGTGGCCAAAGGTGAATGGGCGGATGTTGATGACTATCGCCTAGTTGATGCACTTTTTGAGCTGGACGCA  
AGCTGCATAGAAGATGTGGACTGGGATAATCTTCTTGACCACAGGCCTGGAGAGATATGTCGAAAGAGATGGAACCAAAT  
GGTTCTTCACATAGGTAACTTAAAAACAGCTCATTTGCTGAACAAATAGAAGTTCTAGCTAAGAGATACCGCCCGGATT  
TCGCCGAAGTAAGAGAGGCTTGGGACAATAAACAGTCGTTCCATGA

>CcMYBR11 |Locus\_ID=BC332\_32616 |CDS\_len=1743 |strand=-

ATGGAGCGTTACCTCTTCAAACGCCGCGCCGACGAGAAAGAAAGAAAAAACATGGAAACATTCTGAGAAGTTTAGTGA  
AGACTGCGATGAGGTTGCTTTGAGAATTGTTGAAGGAAAGAAGAGTAGGAAGTTGAAGAAAAGCCGCGTGCTGAGCAGG  
AGAAAATGCATGATACTGAGGATGTACAGGAAGATATTGTTGCTGAAGTCGACGAAGGTGATATTTCTTCGCCTATCAAG  
ATTGAAGAGAAAAACAGAACAGACAATGGGAATATTAAGAGAGGAAAAAGGTAAAATCAGGACATAGCTCTGAAGATCC  
TACGCATGAGATTGAAGAAAAAACAGAACAGACAATGGGAATATTAAGAGAGGAAAAAGGTAAAATCAGGACACAGCT  
CTGAAGATCCTACGCATGAGATTGAAGANNNNNNNNNNNNNNNNNNNNNNNNNNNNNNNNNNNNNNNNNNNNNNNNNNNN  
NNNNNNNNNNNNNNNNNNNNNNNNNNNNNGAAGAAGGGCTGAAAAAGATTTTAAATTCTAGATCTTATCCTGAAATAAGGGG  
TTGCTGGAAAGAAATAGGGAGTGCTATACCATACAGGCCTTATACTGCAGTTTATTATCGTGCACAGATCTTGTTCGAA  
GGAGTGAATCACGTAAATGGACTGAAGAAGAGTATGAAATTGTACGAAAATTCAGAAAGAGCATGGGAACAATTGGAAG  
GTCTTAGCTGATGAACCTGGAAAACATCGGTTTCATGTGAAGGATACATGGCGAAGGATAAAACGGCCAAATCAGAATAA  
AGGACAATGGACTCAGGAGGAGTACCAGTCTTTGTTTGAATTTAGTAAACACCGATCTGAGACTGAGGCTTTCTGAAGAGA  
AGAGATCTAAGTATGGGATGTTACGGGATAATATTGCATGGACTGCCATAAGTGACAAATTGTCCACGAGAAGTGAAGCA  
AATTGCTGCTTGAAATGGTATGATCAATTAACATCACCCATGGTGGCCAAAGGTGAATGGGCGGATGTTGATGACTATCG  
CCTAGTTGATGCACTTTTTGAGCTGGACGCAAGCTGCATAGAAGATGTGGACTGGGATAATCTTCTTGACCACAGGCCTG  
GAGAGATATGTCGAAAGAGATGGAACCAAATGGTTCTTCACATAGGTAACTTAAAAACAGCTCATTTGCTGAACAAATA  
GAAGTTCTAGCTAAGAGATACCGCCCGGATTCGCCGAATTTAGTGAAGACTGCGATGAGGTTGCTTTGAGAATTGTTGA  
AGGAAAGAAGAGTAGGAAGTTGAAGAAAAGCCGCGTGCTGAGCAGGAGAAAAATGCATGATACTGAGGATGTACAGGAAG  
ATATTGTTGCTGAAGTCGACGAAGGTGATATTTCTTCGCCTATCAAGATTGAAGAGAAAAACAGAACAGACAATGGGAAT  
ATTAAGAGAGGAAAAAGGTAAAATCAGGACATAGCTCTGAAGATCCTACGCATGAGATTGAAGAAAAAACAGAACAGA  
CAATGGGAATATTAAGAGAGGAAAAAGGTAAAATCAGGACACAGCTCTGAAGATCCTACGCATGAGATTGAAGAAGAAA  
ACAGAANTCAGGAACAGAAAGCATACCATACACTGGAAAAACAGTAGAAACATGAGGAACCGAAGAGGAATACTAGCGGAT  
TTGGACCAAGGAAAAATTATCTTTAAAGGAACATCAGGCGGGCTCCTGACTTGGTATTTTAG

>CcMYBR12 |Locus\_ID=BC332\_30379 |CDS\_len=5025 |strand=-

ATGCCGCCAGAGCCATTGCCTTGGGATCGGAAGGACTTCTTCAAGGAGAGGAGGCACGATCGGTCAGAAGTGTGCCACG  
GTGGAGGGAGCCTGCATCGCACCACCACTATACTTCTTCTCGTTGGCTTCTGATTTTCGCTCTAGAGCCCCCTCCTCTG  
GTCATGGTAAGCAGGGCAGTTGGCAAATGTATCCTGAAGAACTCGGACATGGTTTCATGACTTCTCGTTGCAACGAAAAAG  
ATTGTTGAAGATGAGAGCTGTCGGCAGTCTCGTGGTGATGCTGGCAAGTATGGAAGGAATAGCAGCAGCAGCAGGGAAAA  
TAGGTCCTTTGGTCAGAGGGATTGGAGAGGTGGTGGTGGTCTCACTCTTGGGAAGCTGCATCCCCAGTGGTTCTGGTT  
CTGTAAGACAAAATGATGCTACAAAATACAGAGGTCACTGGATGTTATGGAGCCTCACTCTGAACATGTTAATACATGT  
GATCAGTCTCACTCTAGAGCCAGCACAAATAAGAGTCTACTGCTAATGCAACAGCAAGCAGGGGCAAGATTTGAGAG  
AGAGACCTCGCTGGGGTCAATTGAATGGAGACCACTCAAATGGACTCGGTCTGGAAGTTTATCATAGGGGATCATTA  
GTCATTCTGGTAGCATGGGAGTGGATTCTAATGAGACAAAGCCTGAGTTGCGGCTTGGAAACTCAAAAGCCGTTCAATCT  
CTTACAGGGGATGCAACTGCCTGTGTAACCTCTGCTGCCCTTCTGAAGAGACAACCTCCAGGAAGAAGCCGCGCCTGGG  
TTGGGGAGAAGGACTGGCCAAGTACGAGAAGAAGAAAGTTGAAGGTCTGAGGATAATGCTGTAAAGGTGGGAACCTCTA  
TCTCTGGTGATAGTGTAGAACCTAGTCATTCTCAGCTCTTGAACCAGGCAGATAGAAGCCCAAGAGTTGCTGTTTTCCA  
GATTGTCAATCTCCTGCAACTCCTTCGTCGGTTGCTTGTAGTTCTTACCAGGTCTTGAAGATAAACTAGTCAAGGC  
AACAAACATTGATCAGGATGTTGGTAATTTATGTGGCTCACCAACGTTGTCTCCCAATATTACGCTGAGGGATCAGGTT  
TTAAGTTAGAGAATTGGGATCTTGCTCAGATTTCCAATTTGAACCTTCAATCAATAAACTGCTACAATCAGAGGACCA  
AGTTCTGTGGACTCTGGTTTTATGAGATCAACTGCAGTGAACAAGTTGCTAGTGTGGAAGAGTGATATTACTAAGGCCCT  
AGAAAAAACTGAAGCGGAGATTGATTCATTGAGAATGAAGTGAAGACATTGATCTCTGGACCTAAAAATACCCAGCTTG  
TTCCATCTGCTTCTGTTCTCCACCAAAAGATTGCAATGCAAATTCATGAAGATCAAGGCGCTACTTCTAATATAGCT  
TCTGGACCTGCTCCTTTGGTAGTTGATATACCTGACGATTTGGTTGGAGAGGAAGGGGCTAATATACATGAAATGAGCA  
GACCGAGGTAAAAGTTGAGGACATTGATAGCCCTGGTAGTGCAACTTCAAAGTTTGTGAATTGCCCTCAGAGAAAGATG  
TGGCACCTGTTGATGTCTTGAACATGGTGGAAATATTTATTTAGATGACAGCAAGTCTAGAAGATTGAATGTCAATATG  
TGCAGTTTCACCGAGGAGAGCGCTAAATCTAGAAGTTAGATGTAAACTGTGCAGCTTTAACGAGGAAAAAGCAAGGGA  
CACACTTGTGTTGCTGGGAGCGCTCCAGCCAATGCCGTTATTCTTACTCTGCTTCCAATGGCATTGTTGAATGGTGGAG  
AAGATGCTTTATATAATTTGATATTAGCTGCCAACAAAGATTCTGCACGGAGAGCATTTGAAGTATTTAAGAACCTACTG  
CCTGCCAGCAAATGCAGTTTTGATTTTTCAAGAACTGTGAGAGTCTCTTTGTTGCAATTGATCATGCGGTTGAAGAAAG

ATTTGCTAAGAGAAAGCAGTTTCAACAGTTCAAAGAAAAGATAATTGCCTTAAAGTTTAGGGTACATCAGCACCTTTGGA  
AGGAAGATATTCGCATGCTTTCTGTAAGGAGGTTTCGTGCAAAGTCTCAGAAGAAGTTTGAAGTTGAGCCTGCGCCCTGTG  
CAGATAGGACATCAAAAACACCGTGCTACAGTTCTGTTACGATTTTCTACCACTGTTGGAAACTTAAGTCTGGTGCCCTC  
ATCAGAAATATTGAAGTTTCGCAAGCAGGCTACTCTCAGAACTTGGGGCAAAGGTCTACAGGAACACATTAAGGATGCCTG  
CTTTAATTTTAGATCAGAAGGAGAGGATGATGACAAGGTTCAATTTCAAAGAATAGTCTGGTGAAGATCCCTGCGCTGTT  
GAGGAAGAAAGGGTCTGATCAATCCATGGACATCTAAGGAGAGAGAAATTTTATTGAAAAGCTTGCTACCTTTGGGAA  
AGACTTCAGGAAGATAGCTTCTTTCTTGATCACAAAACAAGTCTGATTGCATAGAGTTCTATTACAAGAATCACAAAT  
CAGATTGTTTTGAGAGAACAAGAAGGAAACCAGATTATTCTAAACAAGCGAAAGTTTGTTCGCAAATAGGTACCTTGTT  
GCTTCTTCTGGGAAAAGATGGAACCGTGAGGCTAATTCTGCTTCTCTCGATATCTTAGGTGCTGCATCAGCAATTGCAGC  
TAATGTGGAGGACAGTATTGAAATTCGGCCTAAGGGTACGTCAAAGTACACCGTTTGAATGATCACTGAATACAAGGCGT  
CCAGACTTAATGAGTTAGAGAGGTCAAACAGTCTTGATGTATGCCATAGTGAAGAGAAACAGTGGCTGTTGATGTTTTG  
GCTGGTATCTGTGGTTCCTTATCATCAGAAGCTATGATTCTTGATTACAAGTTCAAGTTGATCCTGGAGAAGGAAACCA  
GGAATGGAAGCACCAGAAAGTGGGTTTCGTGACAGAGATTGCCCGGACTCCAGAGGTTACCCAGAGTATGGATGATGAAA  
CCTGTTTCAAGTGAAGCTGTGGGAGATGGATCCTACTGATTGGACAGATGAAGAGAAATCAGCCTTCATCCAGGCTGTG  
TCAGCTTATGGAAAAGATTTTATTACGGTCTCAAGATGTGTGGAACGAGATCCCGTGATCAGTGCAAGATCTTCTTTAG  
CAAGGCTAGGAAGTGTCTTGACTAGATAAGATTCTTCTGTACCTGGCAATTTGGAGAGGCAGGATGTTAACGGTGGAA  
GTGATCCTGATGCTTGTCTATGGAGACTAAGCTGTTGTGTAATGGAAAATCAAGTTTGATGTTGGAAGATGTATCTGAT  
TTATGTATGAAGGTGGGATTTCAAATCACAAATTTGACCAGTTCTGATGAAAAAGATGGGGCTGGAGAAGTGGATTCTGT  
AGATATTCTTCAGGTAACTGTGATGTAGATAAGCAAGAGGTGGAATTTAACAGGGATTGTGATCAGATTGGTGCTTGTA  
TTGGAATGGTAGAGGGGATGAGAATATGGTTATAGTTTCTCAGGAAGGTGTTGAAATTTGGTGGAGATGCCTCGGAGAAT  
GGCCTGCTTGACATACCGTGTCCGAATGAAGTTTCTGCTAAGCATTTAGGTGAAGAAATTTCTTCGCTGAGCATGATTT  
GAAAGATAGAAAGGCAGAAATAGCGGAAGTAGGTAGGTCAAAGTCTCTTTGGAAGATAGAAAGCCCAATATGGTGTTGT  
CGGGAATAAATCTGGTCTTGCTGCTCCTAGGGGAGGGGATTGTGCCCTCTTAATGGATTCCAGAATATGACTCATTG  
GAATCTGATTCTGAGTGTAAGCTTTACTTGGAAAGCAATATTTCAAGTTCAAGTAAACAGATGCCTGAAGGTGCTAATGC  
TGATAAATTATCAGAAGAACTTGAGAATGTTTGTGATGAGCAGTGTGAGAATGCTACTCAGTCGGCTGAGCTGCCTTTGC  
CGAGCCATTCCCGGTTGGCCAGGTTGAATCCTGCCAGATTCTTGGCAGCTATTCAAGTGGGGAGTCTGCTCTCACACAG  
TTTGGAGATCCTGGCTGCAGAACATCAGCTGCATTGCAAGAAATCCAGAAGGTAGGTAGGAATCTACAGTTAGATACATT  
TTCTACAAGTGGTTGCTTTCTCCAGAAGTGAATGGTACAAATCGTGGTGGTGGTTCTGTTTCTGATGTTCTGATTCTTA  
ACCGAGAACAGACAGCAGGTAGTTCACTAACTTTGGAGAAACATTGTAGGAATGGTGTGTAATTTGTTTCGGACAGATT  
CTCAGTAAACCATGCCCTCAGGCAAATCCCAGTTCCAATGCACATCGCAGTGATGGTAGCAATCAGCAGTTGAAAATTGG  
TAGCGATTCTTTAGTGCAAGTCATATATTAGATGGCAATTCAGCCACTGCCAAATTTGAGCGTAATAACTTCCCGTGTT  
CTGAGACTCATCAATTGAGAAGTTTTGGTTTTTGGGATGGGAATAGAATACAGACAGGGTTTTCTTCGTTGCCCGACTCT  
GCTATCCTCCTGGCAAAATATCCTGCAGCATTGTTGTAATTATGGAATATCTTCCACCAAAATGGAACAGCCTACTTTGCA  
TGGGGCTGTGAAGATGGCTGAGCGGAATTTGAATGGTGTCCCTGGGTTTCCAACAAATGCAAGTGGCAACAATGGAGTAG  
CAGCAGCAGATTATCAAGTGTACAGAAATCGAGATGTGCAGCCTTTTACTATAGAAATGAAACAGAGGCAAGAGGCGTTC  
TCTGAGATGCAAAGAAAAAATGGGTTTGATGTTGTGTCTGGTGTGCAGCAACAAGCGAGGGGTGTGCTTGTGGAAGAGG  
AGGGATTCTGCAGTGCAGTGGTGTCTCTGATCCGGTGGCTGCTATCAAATGCATTATGCCAAGGCTGAACAATTTAGTG  
GGCAAACGGCAAGCATCATCAGAGAGGATGATTCTTGGAGAAGTAAAGGGGACGTGAGCAGGTAG

>CcMYBR13 |Locus\_ID=BC332\_17457 |CDS\_len=1395 |strand=+  
ATGGGTATCGACACCCATATTTCCCAATGGATTCTCGAATTCATTCTCCGACAACCACTCGACGACAACATTCTCAACGA  
TCTCATTAACGTTCTTCCACTCCCAGAACGACAATTTGAATCTCAAAAAGGCGCTGCTTGTGAGAAAAATCGAATCCGAGA  
TTGCTAACGTTTCGGTTACTAGAGAAATCCTCGAGTTAATGGAATTAATCGAGGAATTCAGATCATCAAGAAGGAATAATT  
AGGGATTCAAGTCTAGAAAGCCGCTTATTGTGCGGTGGCAGTGGAGTACGTTAAGTTTGAAGGTTGAAAGGGC  
GGAAAGTGATAAAGGGAAGTATTTGAAGCAGTAAGGAGGATATGGAACCGGAGGATTAATTTAATAGAGAAAGTGGAGA  
ATGTAGGCGTTTTATCGGAGGAGCTGTGGAGTTGGAGGGATGAAATAGAGGCGGCGTTATGGGAAGATAGGTGTGCTGAG  
AATGTGATAAGGAGAAGTAAAGGCGTTTTTGTGTTGACGTGGTTAATGCTTTTGTAGAGAAGCTAAAGAGAGAATTGG  
GGCTCCTTTTCTTGAAGTTGTGCGGAAACTTACCATACTGATGAAGCAGTAAAGTCAGTTTTCGGAGAGGTGAACAAAG  
GAGGGGCTAGTAAGAAAAATGGAAGAGGATGCAAGGAAATGCATTGCCAGGAAGAAACATGTTGCTTTCAAACGC  
ACCAGAGGAGCATCAGGTATCAGGATCAGTGATTCTATTGAGTCGGAAGTTGAGGCATCTGGTGGACAGGATGATTCTTC  
AGCTGAAGTGAAGATAGCTAAGAAAGCACTTAAATTGAGTTTATTGGAGCTGCGTGCTATGGTGAAGGATCCTCTACCTG  
ATGCACTACGTTTTGCTGAGACTTTGTGTTCTGTGGTAAGGGATAATATGGGTATCAGCCTGCTGAAAATAACAGTGAC  
ATGGCCCTCAACCAATGGTTTCCAGTAGCAGAATGGCTCAAGCCGGTGGGAGAACCGTGAGGCACAGCAAAATTGTCA  
TCATGCTGCTGCATCCAAGCCAGATCTAGCGAACCAGAGCAGCTGCCATACATTTGAGTGGGACTCTTTCTTGGATG  
ATATAAATGAAGGATACCAAGTGGTGTGAATAGGGTTACTTTACCTAGCCCAAAGAGGACAAAAGTTTCTCCCTAAAG  
AAGTATGAATTTAAAAAATCACCACGAGGAGAAAGCCGTGAAATGGAGTGCCTGGAAGAAGACACTTTGAGAACTGG  
TGTACAGAAGTATGGTATTGGAAGTGAAGGTCATCTTAGATGCTTATCGTGACATTTTTACCACGAGACAATCGGGTG  
ACTTGAAGGACAAGTGGAGAAATATGATATCGTAG

>CcMYBR3 |Locus\_ID=BC332\_15220 |CDS\_len=1137 |strand=-  
ATGGAAGGAGGAAGCAGTAGTACAGAAGAATCAAAGTTGAGCCCCAAAACCAAATTGAATTCGGAGAAGAGGAAGAGGA  
GGAGGACGATCTCGAGACCGAAGAAAAAAGCAAAGCTCAAGGTACAACAAGAACCTGCTCTAGCAACAGCACTGTGGAAG

AGAACGGAAAAAAGACCAATTCAGGAAGTGTACGGCAGTATGTACGTTCCAAAACCTCCGAGGCTACGGTGGACGCCTGAG  
CTCCATCTTCGCTTTGCTCATGCTGTTGAAAGATTAGGAGGCCAAGATAGAGCCACACCAAAATTGGTTCTTCAATTAAT  
GAACATTAAAGGCCTCAGCATAGCGCATGTCAAGAGCCATCTTCAGATGTACAGAAGCAAGAAAACTGATGACCCCAAGTC  
AAACAGTTTCTACGGACGGAAGAACCTTACTTGAGAACGGAGATCATCATATTTTCAATCTCACCCAACCTTCTAGGCTA  
CAAGGTATAACCAAACCTTCTAGTTCAAGCTTAAGGTATGAGAATGCTTTATGGAGTCGTCAACCTAATTCTATGTACAA  
TTCTTATAACGTGAATATTGGAGGTGGCTCCCGTACAAGTACAAGACATGGGTTTGCAAGCCACATCAATGGATACTCAT  
CAGATGGACAATTATTTCCATGGAATAAACCCATTGATACTGAGAAAAACAAAACCGGCCTCAATTCCTTCAAATCAA  
AGATTTTGGCCGACTCAAATTGGAATAAGCTCCGCAAAACAGAATCTCCTAATGACATTACAATTCAATAGAAATACAGT  
TGAGACAGCCACACAATTCAACAGGAGAGAGCAAGAAATGATGACACAAGTGCGGGCTAATATATCTCTTTCTTCTTCAA  
GGGAAAAGGATGGACGAGTGAGGAGGTTGCAGGAACAATAACAAGCACATCCAATAAAAGAAAGATTCAAGATTGAGAA  
ATCAATCTTGATTGAACCTTTCACTGAAAGCAACAAGAGAGGATCATGATGATCATTTGAAAAGATTAAGGCTGAACA  
AGTTGGGGATCTTCTTTCTTTCTTTGTACTCATCAAGTACCAATGATCAGGAAAATAATGAAAGAAGGCAAATACCC  
TAGATCTGACTCTTTGA

>CcMYBR4 |Locus\_ID=BC332\_24070 |CDS\_len=837 |strand=-  
ATGTTGGAGGATAGTGATGAGACTGGATGCAATTCGAAGACAAGTTCTAATTTTAAGAAAAATGAGGATGAAACGGAGGA  
GAACGGTTCGAGCAAGTTTAAGGATGGAGGAAGCTCAAGCGACAGTACACTTGAAGAGAGCGAAAAGAAGCCCTATGTGA  
GACCTTACGTTTCGATCCAAGATGGCTAGACTCCGCTGGACACCTGATCTCCATCTCCGTTTTGTTTCATGCTATGGAAGA  
CTTGGTGGACAAGATCGAGCAACACCAAAGCTAATTCTTCAAATGATGAACACCAATGGACTTAGCATTGCTCATGTCAA  
GAGCCATTTGCAGATGTATAGAAGCAAGAAGATGGATGGCCAAAGTCAAGGGATTGGACACCATCGCAAGCTTTTTATGG  
AAGGTGGAGATCCAAATATTTTCAACTTGATCCGATTCCCAATGTTCCCTGCTTATTATCAGAGGCTCAATTCAACTTTT  
AGGTATGGAGATGCTTCTTGAATTGTCATGGTAATTGGATGCCTACAATGGGGCAAACCTACCTAACCAGGACAGGAAG  
AGGATTGTACACTACACTGAATCATTTATGTACAAGGATTCCTCTTTTCTGAAATTAAGATGTACTGGGATCATCCA  
GAGGAAACCCTAGTGATGACCTCACTAGGTTGTTTAACATAGCTGCAAAATCTCAAGCAAGGGCTTTTGATGGAAATGGA  
ATTGCTTCTTCTCCAGATTTGGAAGAGCCATAACTCCTTTGAAAAGGAAAGTTTCAGAGTGTGACCTTGATTGGAATTT  
ACACCTAGGGGGCTACGAGGTTTATAGAAGATGCTAA

>CcMYBR5 |Locus\_ID=BC332\_10237 |CDS\_len=1053 |strand=+  
ATGGAACATGGCAATGGAGAAACAAGTGAGGAATATTACATGGAAAAGGTCATGTCATCCATTGATTTGAATGAAGAAGT  
TGATCATGATCATAGCAAAATTCACAAATTGATGATGAAGCTATTGAAGTTATTAGTGTGGAAGTGATAAAATTACAA  
ATGAAGAAAATAATAGTAGTTTCATGTGGAATGAAATCAATATTAAGAACAAGATGAGCAAAGTTAGACAATATGTAAGA  
TCAAAATTGCCAAGGCTAAGATGGACTCCACAACCTTCATCTCTCTTTTGTAAATGCCATTCATAGACTTGGTGGTCAAGA  
AAGAGCAACACCAAAATTGGTTCTTCAGATGATGAATGTGAGAGGACTCAGCATTGCCCATGTTAAAAGTCATCTCCAGA  
TGTATAGAAGCAAGAACTTGGAGAGTTTGGACAAGTGTAGGCCATGGTCATAGAGCAAATCAAAGAAGAAATTATCTC  
TATGGAGATTTAAGCCAAAGATCTTTTAATCCTCTTCAAGATTTCAAAATGAAGAATGGTGCAATTGTATTAGCAAGAAA  
TTTTAATGATGATGACAACATTAATCACCATTTTCAAATTCATTTGCTAGAATCAATCCAGATACATGGAATGGTCTT  
CCCATCAAGGAACCAACAATTTATTGAAAATGAAAATCTTGGAAAATCATCAAATTTGTCCTATTAGGCAAAGACATTAT  
TTTCTTGAAGAAAAAAGTGGCCTCCATTTGAATTCATAAAAAATAAATTGAATTCATCTTTGTTTCATCACTACTGG  
ACCAAAATGGAGTTGCAGATATAACAACCTTGATCCAAAATATAAGACCCCTCTTAGATTTGAGATGAAACAAGACAAGA  
AGTTCAATTTTGGAAAAGATTATTGGCTGCCTGATTTGCAATTGGGATTGAGCAGAAGTGAAGAAAATAATATGAAGGAG  
AAAATTATTCACCATAGTAATAAAGTGGAATTATCAGATATAAACACTATGCTTTCTCTTTCTTTCCTTCTTATTATC  
AAGTGCAACCTAA

>CcMYBR6 |Locus\_ID=BC332\_04479 |CDS\_len=1149 |strand=+  
ATGGCTGAAAATTTAGTGAAACAAGACCATGAAGAGATGATGATGATTATGGAAAACCTCATCCTCCTCGTCCATTGATTT  
GAACGAAGACAACAAAGGGGAAAGCGAAGAAGAAGAAGAAGAAGTCAATTGAGGTGGAAGATAGTAGTGAGAAAGAAA  
CAGAAAGAATAAGTAATTATAATAGTTGTGATGTTGAAAAGAAAAACGTAAGGCAATACGTTTCGATCGAAATTGCCGAGG  
CTCCGTTGGACTCCAGAGCTCCATCGCTCCTTTGTTCAAGCCATTCAAAGACTAGGTGGTCAAGAAAGAGCCACACCTAA  
GTTGGTTCTCCAAATGATGAATGTGAGAGGTCTAAGTATCGCCCATGTAAAAAGTCATCTACAGATGTATCGAAGCAAGA  
AACTAGATGAATCTGGACAAGTGTTAGGTGAGGTAATAATAGGGGAATGCAAGGAAGAGGCTATTTCTTTAGAAACCAC  
CTAGGTGGTCAAAGATATAACCCCTATACAAGATTTCAAGATGAAGAATGGTGCCATTGTATTAGCAAGGAATTTCAACTA  
TGATGACCATGCACTTAAAGGCCGTTTTCGAAATTCCTTTTCGAGACCACCATATCAGTCCAAAGGCATCATTTCCAGGT  
ACATGCAGTGGTCTTCCGATAATCAAGGAGGCCTATGTAATACTACCAAGTCTCTGCAAGGTGAAGATTTGTTGAGAATG  
AAGAGCTGGCAGACACCAAGACAAGCAGTAATTGAAGAAAATGGAATACATGAAATTGTCCCAATTAGGTCAACCCAATT  
TCTTGAACAGAAAAAGTGGCCTCCATTCATCCCCAATCAGTGGGAGGAGAAAAGGGCTGATTTTTGTTTCAGCTAAAACT  
CCCATTTTTTGTCTTCAACAAAATTTGGGACAACCATATTCCAAGTGAAGTACTGCAGAAACAATAATGCCCTCGAGCAA  
AATCTTGTGACACCTTTCACGTTTGAGATGAAACAAGACAAGAGTCCCTTGGAGGAAAAAGACTGGTTACCTGATTTGCA  
ACTAAGATTAAGCAGAAGCACAGAGGACAAGAATGAGAGCAATAGGAGGGATCAATCAGATATAAACACAATGCTTTCTC  
TTTCACTGCCCACTTACTCAGCAACCTAG

>CcMYBR7 |Locus\_ID=BC332\_05115 |CDS\_len=759 |strand=+  
ATGATGAAGGAAAATCTTCCAAAAATTCTCCTTGTAATTTATCCATGAGACTTGGTCACGTGGAGCAGCAAATATTAGA

AAATAGCAATAAATCATCATCAGGGGTAAGACCATATGTTAGATCGAAAATGCCGAGACTCCGATGGACGCAAGATCTTC  
ATCGCAACTTTGTGCATGCTGTTGAGCGACTTGGTGGAGAAGATCGAGCAACTCCAAAGATGGTGCTACAGCTGATGGAT  
GTGAAGGGACTCACCATATCTCACGTTAAGAGTCACCTTCAGATGTACAGAAGCATGAAACATGAACAGATGATGCAAGC  
TGAAGCAGAAGCTGCAAATGGGATTAAGAGGAATAGGATGGATGGTCCAGATCAACTGAATTATCTTAATTACTATGATG  
GCAAAGCGCTGTTAGATGGGCATCCTAATTCGAAAGTAACGATTAACACTTCAACTTAATTGCCTCTACTCCTAACTTT  
TCTCTGCTCAATGGAAAGATATGCAAGAGAAGATGATGGGATTGGAAGGACAATCTAAACCAGCTTGCAACATGTTTCA  
GGATTTCTTCAATGGCTGTACTACTGTTCAAGATGGGAATTATAATATTGGAGAATGTGGTAGCAGTTTGTCAAATAACC  
GTTGTTCAATAATTGACACTGAAGAAGAGGCCCAAGACTCCAGCAGCACTATGTCTTTAGAACCATCTGCCTGTTTAGAT  
CATGGGACTAATATCTCTCTTGACCTTACCTTGTTAA

>CcMYBR8 |Locus\_ID=BC332\_11027 |CDS\_len=453 |strand=-  
ATGGCTATGGGGAGGAGGAAGTGCACCTTGTGTGGTGGGAATGGGCATAATCAAAGAACGTGTATTGAGAAAGGCAAAAG  
CATCAAATTATTTGGTGTGGAGATCACTACTTCTACTGTTGCTGCAATGTCTAAGATAGGAAGAAAAATCAAGAAAGGAA  
ATCCATGGACAGAGGATGAACAAATAGCATTCTTGAAAGGATTGAAGTTTCATGGGAAAGGCAATTGGGCTAAAATTGCG  
AAGGATTTCTTGCTAGTAGAACATCAACACAAATTGCTAGTCATGCTCAGAAGCACTTCATGAGATTGGATGCTAATTC  
CAGTGAGAGAAAATATCTCAAGAAGTCAAGTGTGTTTTGACCTTCATCTTGAAAAACAGAGGACAGGGAACATGCTATTG  
TTCCAGTGGAAACTCATCATGTTCCAAGTTTTCTTTCCAATTACAATAGATGA

>CcMYBR9 |Locus\_ID=BC332\_11026 |CDS\_len=606 |strand=+  
ATGTTTAGAAAAGATTACAGAAGAAAAATCAAGAAAGCAAATCCATGGACAGAGGATGAACAAATAGCATTGTTTGAAGGG  
ATTGAAGCTTCATGGGAAAGGTAATTGGGCTAATATTGCTAAAGATTTCTTGCCCAATAGAACATCAACACAAATTGCTA  
GTCATTCTCAGAAGCACTTCATGAGATTGGATGTTAATTCAAATGAGAGAAAACATCACAAGAAGTCTAGTGTTTTGAC  
ATTCATCTTAAGAAAATAGAGGACATTGAACATGCTATTGTTCCACTAGAAAATAATCAAGAATCTCTTCATGTTCCAAT  
TTTTCTTCCCAATTTCAATTTGACCAAAAGAATCCAAGTACCCAAAGTAACGCCTGTTACTTGGGTTTACATGTATCCAT  
ATCATCAGTACACCTCTACATCAGCCAAACTTCTTGAGACAATATTTTTGCTTCTTAGATTTTCAAGATATTAAGGAATCC  
CCAATTTTGATAAGAGACCCTGTGATTGATTTTTTTGTTAAGGGACAAGCTGTCCAATCTGCACCACTAAGTTTCAGTGAT  
AAAGGTTATAGGTTCACTTGACAAAAGTATTCCTTGCTCTGGTTAA

>CcMYR1 |Locus\_ID=BC332\_26464 |CDS\_len=1248 |strand=-  
ATGTACCATCATCACCACCAAGCTACCAACATGCACTCTTCGACAAGAATGTCTTTCCAGAAAGGCATCTGTTCTTGCA  
AGGCGGGAATGCCAACGGAGACTCAGGACTTGTCTTTCAACTGATGCTAAGCCAAGATTAATGAGACGCCAGACCTTC  
ATGAGAGGTTTATAGAAGCAGTTAACCAACTTGGTGGGGCAGACAAAGCCACGCCAAAATCAGTTCTCAAACCTATGGGG  
ATCCAGGGATTAACCTTGTACCACTTAAGAGCCATCTTCAGAAATACAGACTAAGTAAGAACCACCATGGACAAGCAAA  
TTCTAGCAGGGACAATAAAGCTGCAGCAAGTATGGAGAAAATATGTGAGAGCACTGGAAGTCTACGAGCAATCCAAGCA  
TTGCACCCCAACCAACAACATATACCAATAAGCGAAGCAATACAAATGCAAATTGAGGTCCAAAGAAGGCTTCATGAG  
CAGCTTGAGGTGCAACGACATTTACAGCTAAGGATAGAGGCTCAAGGGAAATATTTGCAGGCTGTGCTCGAGAAAGCACA  
AGAACTCTTGGAACACAAAACCTTGGAACAATTGGATTAGAGGCAGCCAAGGTTCAACTATCGGATTTGGTATCCAAAG  
TATCCAACCAATGTCTAAATCTGCATTTTCGGAATACAAGAACTTTCAAGATTTACACCCCAACACAAAGCAACC  
CAACGGTTAGCAGATTGTTCACTGGATAGCTGCTTAACCTCCTCTGAAGGCCCTTGAGAGACCTGCAGGAAATGCATAA  
TAACCAAGTTGGGCTGAGGACTTTAACTTTGGACCATGTACAGAAGATATTGAAAATCAGGCGAGGTTACATCGGACTG  
ATCTAAGATGGCGTGACGACCTCAAGGAGAACAGATTGTTTCCAAAATGGATGAGGATACAGAAAAAGAATTTGCCAAA  
GAGACAACTGGAGCAACTTATCAATGAACGTTGGAAGCCAAGGAGAAAATCGGAATGTTAACAGTAGCTACGTTGATGG  
ACGACTTAATGGAATAGATGCAGACATCAAACCTTTTACCAGCTCCAATAGACAGAAGTGATTCAACGAAACCAGAGA  
AGCAAGTGTCACCACAAGAGTATAAGCTGCCTTACTTTGCTCCGAAGCTGGACCTAAACACGGATGACCAAACTGATGCT  
GCTTCTAGTTGCAAGCAACTTGACTTAAACGGTTTCAGTTGGAACATA

>CcMYR2 |Locus\_ID=BC332\_26060 |CDS\_len=1245 |strand=+  
ATGTACCATCATCACCACAGGATAATAGCATGCACCCTTCAACACGAATGTCTATCCCTGAAAGGCATCTGTTCTTGCA  
AGGTGGAAATGGCAACGGAGATTAGGGCTTGTCTATCAACTGATGCTAAGCCAAGATTGAAATGGACGCCGGACCTCC  
ATGAGAGGTTTATAGAAGCAGTTAACCAACTTGGTGGAGCAGACAAAGCCACTCCAAAATCAGTTCTAAAGCTCATGGGG  
ATCCAAGGATTAACCTTGTACCACTTAAGAGCCATCTTCAGAAATACAGACTAAGTAAGAATCTCCATGGACAAGCAAA  
TGCTAGTGGAGCAAATAAAGCTGCAGCAGGAGTAGAAAGGATATCTGAGAATAGTGAGCATGTATAAGTAATCCAAGCA  
TGGGACCCCAACCAACAAAAACATTCAAATAAGTGAAGCAATACAAATGCAAATAGAAGTGAAAGAAGGCTTCATGAG  
CAGCTTGAGGTACAACGACATTTACAGTTACGGATAGAAGCTCAAGGGAAATATTTGCAGTCCGTGCTGGAGAAGGCACA  
AGAAACCTTGGAAGACAAAACATGGAACAGTCGGATTAGAGGCAGTGAAGGTTCAACTGTCAGAATTTGTATCCAAAG  
CATCCAATCAATGCCTGAACCTCTGCATTTCCAGATATAAAGAACTATCAGGATTTACAGCCAACGAACACAAGCTACA  
CAGCCAACAGATCGTTCAATCGACAGCTGCTTGACCTCTCGTGATGGCTCTTTGAGGGACAATGCAATGCATGATAACCC  
AATTGGATTGAGGCTTTTCGACTTTACACCATCTATGGAGTGAAGGATATTGAAAATGACACCAGGATACAGCAGACAG  
AACTACGATGGTGTGACAACCTCAAGGAGAACAGACGATTATTCTCCCAAGTGAACGAGGGTAGAGAAAAAGCATTACC  
AGAGAGACAACTGCAATAACCTATCAATAAGTATAGGACTTCAAGACGAAAACTGAATGGAAGCATGAACTACTCGGA  
TGGAACCTTCAGCGGAACAGAGAGAGATGTTAACTTTTTACCAGGTAGCCAAAAGAAGTGAATCAGTGCCAGAGAGGC  
AGAAATCATCGCAAGAGTATAAAGTGTACACTTTGAGCCTAACTGGATCTAAACATGCATGATGAACTGATGCTGCT

TCAAGCTGTAAGCAATTTGACTTAAATGGTTTTAGTTGGGGTTGA

>CcMYR3 |Locus\_ID=BC332\_27762 |CDS\_len=1020 |strand=+

ATGAACTTAGTTTTGTCAAGTGATGCCAAGCCTAGACTAAAATGGACTCCTGATCTTCATCAACGATTCGTGATGCAGT  
CTCTCAACTAGGAGGTCCAGACAAGGCTACACCAAATCATTGATGAGAGTGATGAACATTCATGGGCTAACTCTGTATC  
ACCTCAAGAGCCATTTACAGAAATATCGTCTAGGAAAAAGTCAGGTGACTGATCAATCTTTTGATGAAAAGAAACAAGAA  
GGTAAGCTGGAATTGTGTACAATAGCACATGATGATGATACAAAGGAAAATGAAATATCCAAAAGCTTAAATCAGAGGAC  
TTATTTTGATGCAGAGAGTGATCAGTTGTCACTTGGAGTTTCATGTGATGGATCTCAGAATCAAATGAATGAGAGTTTGC  
AAATAGCAAGAGCTTTACAAATGCAAATGGATGTACAGAGGAACTTCATCAGCAGATTGAGGTACAAAGACATTTACAA  
CTGAGGATTGAAGCACAAGGCAAGTATTTACAATCAGTTTTAAGGAAAGCACAGGAGACACTAGCAGGATATGGTACATC  
TTCAGTTGGAGTTGAACCTTGCTAAAGCAGAATGTCTCAATTAGTTTCAATAGTTAACATGAGCTGTTGTCCAAGTACTT  
CATTGTCAGCCATAACAGAAATTGATGGTTCAATCTCGAAAGACACACAGACGAAAAATTTGAAAGGCGGAATCTTGTCT  
TCACTTGAAAGTTCTTTAACATCATATGAGAGCTCGGTAAGGAAGGAAGATCAAATGATACGCGGAACAACAAGAATAC  
TAATTGTATCGGTCTTTCATTGAATCAAGAACTAAAGAAAGAAAAAGAAGTAGAAATAACATTTGTGATCATGATATGT  
GTGTTGAACAACCATCTGGTAAAAGATTTTTGGAGACAATTGATTTGAACAGCAAGTGCCCAAATGAGTATGATGAAAAT  
GGTCCAAAAGTTATAGACTTGAACACAAGGAAGTAGAGCAATTCAATGAGTATAGTTAG

>CcPCL1 |Locus\_ID=BC332\_15022 |CDS\_len=915 |strand=-

ATGGGTGAAGAAGTGAAAATCACCGACGGTGATGCTGCTTCGCCGGAGATGATAACCGTGTTCTCGAATGGGAAGACGG  
ACTTCCTAGTTTTGACGATCTGACGCCGTTATCTCAGCCGTTAATTCGCCGGAATTAGCATCGGCGTTTAGAATCACGC  
CGGAGCCGGCGAAGACGATGACCGATGTTTCATCGTGCTTCGGAGAGTACGTTTTCTCTCTCCGTGCTGGAGGAGGATTA  
CATATGTTGTCTGATAAGTTTAATTTCAACGAAGGAGGAAGGAATGAGAATGATGAGGTGGATCTGACGCGGGATGGATC  
GGATTGAGGAAGACGAGGAGGATTGACCCGGAGATGGTTCCTGAAGAAGCTGATTCCGCATTGAGGAATGAAATGAATT  
GTGGAGATGATAATTGAGCTAAGACATTGAAAAGGCCGCGTTAGTATGGACACCGCAGCTGCATAAGAGATTTGTGGAT  
GTGGTTGCGCATTTAGGGATTAATAATGCTGTGCCGAAGACAATTATGCAGCTTATGAATGTGGAGGGATTGACGAGGGA  
AAATGTTGCTAGTCATTTACAGAAGTATAGTTGTATTTAAAGAGAATGCAAGGATTGTCCAATGAAGGACCGTCTTCGT  
CTGACCATTTGTTTGCGTCCACTCCTGTGCCACAGAGTTTGCAGCAGTCTGGTGTTGGTAATGGTAATGGGAATAGTGGT  
AATGGACATAGTAGTAATGGTCATATGCCTATGCCTATGCCAATGCCAATGATGTATCCACCACAAATGGTGCCAATGCC  
TATGATGGGAATGTCAGGGCATGGGTATCATCATCAGTATAATATGGGGCAACCGCGAGATTGGTGGGAAATAAATTTG  
GTTCTTATCATCATGTTGCTCCTGGTGAAAAATAG

>CcPCL2 |Locus\_ID=BC332\_17321 |CDS\_len=882 |strand=+

ATGGGTGAAGAAGTAGTTACAAAGCTTACCGACTATGATTCTAACGGCGTTAACGATGACAGACTTCTCTGGGAAGCTGG  
ACTTCCCAGCGCCGATGATCTAACGCCGTTGACTTTGCAGTTAATTCGCTCGGAACCTTGCTCATGCGTTTCAGAATCTCGC  
CGAATCATCAAAGACTATGAACGATGTGAATCGCGCTTCGCAGAATACGTTTACTTCTCTACAGAGATGGCACTCACAG  
GATATGGCTTCAATGAATAGAGAAGAACTGTAACGGAAAGAGATGAAACGGATCTGGTAAGACAAGGATCCGACCCGAA  
GAAGCTTCGGAGAGTTGAATCTGGAGGAAGTATGAGGCGGCTGATGCTGATTCTGCCTTGTGTAGCGAGAAATTTGAGA  
CTGTAAGCGGCCTAGGCTTGTGTGGACGCCGAGTTACATAAGCGTTTTATTGAAGTGGTAGCGCATTTAGGTATTTAAA  
AATGCGGTGCCAAAGACGATTATGCAGCTTATGAATGTGGGAGGATTGACACGAGAAAATGTTGCAAGTCATTTACAGAA  
GTACAGATTGTTTACGAAGAGAATGCAGTCGAACGAGGAGCCTTCTTCGTGCGCTGATCATTTGTGTACTTCCAGGGGGG  
CGACGCTCAGAGTTTTCGTGAGTCTAGTGAGAGTTGTACCCGCACAATACTAATGGTCATATGGGAATGCCAATATG  
ATGCCGTACCAACCGCAAATGATGCCGATGCCAATGATGATGGGAATGACAAATGGAGGACATGTAGGCATGCCTGTTGG  
TTACGCAGGTGGACCGCCAGCTGGATTTTCATCATCCGTATAATTTTGTTACTATCATCCTGTTGCTTCCAATGATAATT  
AG

>CcPHR1 |Locus\_ID=BC332\_07350 |CDS\_len=1386 |strand=+

ATGGAAGCACGTCTGTGTGTCTGTTCAAATGTGGTTGCAAGTCAACTTAGTAATTGTGGTGATCAGGGACACTTTTC  
TTCTTCCCTGTGTATGTTTCCAACAGCCCTAGGAGAGAAGTACCCTAAGTTTCCAGACTTGACAGCAGGCTTCAATGGAGA  
AGGAACTCAAGCAACATCCTGGAAGTGTGCTCTTCGTTGCCTTCCAACAGTGGGGCTGTTGGTCATATGTTCTCATCA  
TCATCAGGATTTTCTGCAGATCTCCATTTCTCATCTGTTTCAACCCAGGAAAAACATTCAGGACCCACATCTTTCATTTTC  
TCAGTCAACATATAGTGAGACATCGATCACATTTCTCATTGCGGAGTTCTTCAATCCACAGCATCAAGCCAATATTTGA  
ATGAAAACCATGAACCTGGTGTATAGATCCATTACCTAATTTCTTGATTATTCAGTGGATACCCCTGTCCAGAATAGT  
CAGGTAGCTTGTAGCGATAAACAAGTGATTGGCAGGAATGGGCAGACCTTGTAATTAATGATGAAGATGCTCTAACTTC  
TAATTGGAACGACATCATGGCTGATACAAGCATTGCCGACTTGGAGCTGAAGTATCAGGAGGGGAAAACAACCTTTAAATT  
TCCAAATGCAGCAAGTCCAAGAATCAGAGCAAATCCCGGCTGTGCTGTAGAAAATTTAGTTATTGCTCCTGCGTCCTCC  
CCTGCAAGTAGTGCTGCAACAAAGCAACGCATGCGTTGGACACCAGAACTTCATGAAGCCTTTGTGCAAGCAGTCAACAA  
GCTTGGTGGAAAGTAAAGAGCTACTCCCAAAGGAGTGCTAAAATTGATGAAAGTTGAAGGTTTGACCATCTATCATGTAA  
AAAGCCATTTGCAGAAATATCGAACAGCTAGATATAAACCAGAAGCATCAGAGGCAGGGTCTTCAGAGAAGAAACAATCT  
TCACTAGATGATTTGTCTCTGGAATTTAAACCGGAATTGAGATCACTGAGGCATTGCGGTTGAGATGGAAGTTCA  
GAAGCGTCTCCATGAACAGCTCGAGATTCAAAGAAATTTGCAGCTGCGTATAGAAGAACAGGGGGCGATACCTCCAGATGA  
TGTTTGAGAAGCAGTGCAAGTCAATGCCTGGTGTGGACTTGGCTAAAGGCTCATCATCCACGGCAGATGATGCCTTTGCA  
CAGTTGTCAGATGCAGTTCAAATTTCCCCTGGCACAACGAACCTGGAGTGTCAAATTTGTTACTGCTAAAGAGGTTGA

TGAGAAACAGAACTGCGGGAAAGGGAAGTTCTTGAAGATCCTGAGACGAATATAACCAGCCCATCTGATTCACACCTT  
TAAAGCGCTCTAAATTGGATGAATAA

>CcPHR2 |Locus\_ID=BC332\_14656 |CDS\_len=1305 |strand=-  
ATGGAGGCGCGTCTTGCCTTATCTGTTTCAGAGGGAAGGTGCACATCCACTCAGTAATTGTGGAGCTCATTCTTCATTACC  
CGTGCTTCGAGCAAGCCTGGAAGAGAAATATCCTAAGTTTCCAGGGCCTGTCCTTTCTTCGTTGCCTTCAAATAGTGGAG  
CTGTTGGTCATTTGTTTTCTCATCATCAGAATTCTCCACCAATCTTCACTTTTCATCTGTTCTGCCGCATGAAGAGCAT  
TCCGCATCTGCACCTTTCATTCTCAGGCAACAAATACTGAGGCATCAGTCCGATTAGCTGCATCAAGCCAGTATGTTAA  
TGAAAATAGCGAACCCCTGGTGTATAGATCCATTGTCTGAGTACCTTGATTACTCTTTAAATACCCCCGTCAAGAACACTC  
AGCTAGATTGTAGCAATACAGGTGATTGTCACATCCCACCTGAGGATCTAAGTAAACAAAGTGATTGGCCTGAATGGGCT  
AACCTTATAATGAATGATGATGATGCTCTTTCTAATTGGAACGAGATTATGGTTGACGCTGGCATTGTTGATGCAGCAGA  
GCCGAAGATGCAATATCAGGAACAAAATCAACCTTCAAATTTCCAGCACACCAAGGTCAACAATTGCAGCAAATTCCTA  
GTGCATCTCTAGAAACATCTGGCATTGTTCTGTCATCATCGACTGCAAGTGGTGCTTCATCGAAGCAGCGGATGCGTTGG  
ACACCAGAACTTCATGAAGCCTTTGTGGAAGCGGTTAACAACCTTGGTGAAGTGAAAGAGCTACTCCCAAGGGTGTGTT  
AAAGTTAATGAAAGTTGAAGTTTGACCATCTATCATGTAAAAAGTCACTTGAGAAATATCGAACAGCTAGATATAAAC  
CAGAAGCATCAGAGGGATCTGAGAAGAAAGAGTCATCCATTGGCGATTTGTCATCTCTGGACTTAAAAACGGGTATTGAG  
ATCACTGAAGCATTGCGGTTACAGATGGAAGTGCAGAAACAGCTGCATGAACAGCTTGAGATCCAAAGAAATCTGCAGCT  
GCGAATAGAAGAACAGGACGCTGCCTCAAATGATGTTGAGAAGCAATGCAAGTCAATGCCCGGTATTGATGCCTCCG  
CTCAGCCGACAGATGCAGTTCAAAGTTCCTCAAACAAAAATGATCCAGGAGTATCACTGGTCGATCATCACGAAGCAGGA  
GATAGAACTCAAAGGACGGTGGGGGAGAAGCAGAAAGAGAACGAAAAAGAAGATACTAGCTCATCAAATTCACCACCATC  
GAAGCGTGCTAAAGTCGATGAATAA

>CcPHR3-1 |Locus\_ID=BC332\_14381 |CDS\_len=1347 |strand=+  
ATGAACATGCGCCGTGCATTATGTATTCAACGATCTAGTGAAGCTCAAAACGGTAACATGGGTGTTTCTGGAGCTATGTC  
GACGTCTTCAAACCTCATTCCGTACAGGCAATCCCGTCAGCATCTAAGAGTCGAACAGTAGGGCATCTATTATCTTCGA  
CTTCTGAACCCCATAAAGATTTTAACTTTTCTTCTACCTCCTCTCAAGAAAGTAGGCAACGTAAATATCCATTTATTTCA  
AGTGAAGCTTCTGCGGCAACCTGCCGATCTTCACTCTCAAGTATACATTGACATCTTTGGATAATTACCCCATAGGGAA  
CGACAGTAATTCCTCGGGCAAAGATGCATGTCATGACTTTATCAACTTTCTGCGAATGATCTCGTTGAGAATGGCCAAG  
TCGAAAGCCTTGAGTTGTCATGCCATCTGACGACCAGGCTAAGAGATTTGATTGGCAAGAGTGGGCTGATCAGCTAATT  
AATGACGATGATGATCGTTTGGGTTGAGTTGGAGCGATATTCTTGTTGATATCAATCCTCCAGAAATTAAGTTTCTGGA  
AACGTCTGAAGTCCTGGCTTGCGAGTCCCATATTCTTCCACCTCCTCCTTCTCCTGCTGCTGCCGCTGCTGCATCGTCTG  
GGCAAATTTGCCAGTTGGTAGCCCATCGTCTACCACAGCGCTGGCAAAGCCTCGCATGCGTTGGACACCTGAACCTCAC  
GAAGTCTTTGTAGAAGCCATCAGTAAGCTTGGCGGTAGCGAAAAAGCTACACCAAAGGGAGTCTTGAAGATCATGAATGT  
TGAAGGCCTAACCATCTATCATGTCAAAGCCACTTGCAGAAATATAGAAGTCCAGATATAAACAGAACCTCGGAAG  
GAACACCGGAAAAAGAAGCCACCAGTGTCTAGAGATGCCATCGTTGGACCTGAAAACGACTATGGGAATAACAGAAGCG  
CTGAGACTGCAGATGGAAGTACAAAAGCAGCTTCATGAACAACCTTGAGATCCAAAGAAAGTTGCAGTTGCGGATTGAAGA  
ACAAGGTAAATACCTCGAAATGATGTTTGAGAGGACGAAGGACATTGGGAAAGATTTCAAGGTATCATCATCAATAACAG  
ATGAACATCCTTCACCATCAACCGAGCCAAAGCATTGCCTCCCAACGACAAATCAGAAGCACTCGAGAAAGATCCTGTT  
AGTTTGAATGATCGTTCAAGTCTGGAGGGAAATCACCGGACAAGAAAGCTCGTGAAGATCACGACACAGATGGTACAGA  
CTCGTGTTGTTACCTCCGTCAAACGAGCAAGAACTGAGGAAAGGTGAGTGTTCATGAATCTTGA

>CcPHR3-2 |Locus\_ID=BC332\_14380 |CDS\_len=1179 |strand=+  
ATGGGTGTTTCTGGAGCTACGTCGACATCTTCAAACCTCATTCCCTCACAGGCAATCCCGTCAGCATCTAAGAGTCGAAC  
AGTAGGCATCTATTATCTTTGACTTCTGGACCCCATAAAGATTTTAACTTTTGTCTACCTCCTCTCAAGAAAGTAGGC  
ACATAAATATCCATTTATTTCAAGTGAAGCTTCTGCGGCAACCTGCCGATCTTCACTCTCAAGTATACATTCGACATCA  
TTTGATAATTGCCCCATAGGGAACGACAGTAATTCTCGGGCAAAGATGCATATCATGACTTCATCAATTTTCTACGAA  
CGATCCTGTTGAGAATGGCCAAGTCGAAAGCCTTGAGTTGTGATGCCATCTGACAACCAGGCTAAGAGATCTGATTGGC  
AAGAATGGGCTGATCAGCTAATTAATGACGATGATGATGGTGGTTTGGGTTGAGTTGGAACGATATTCTTGTTGATATC  
AGTCTCCAGAAATTAAGTTTCTGGAACGTCTGAAGTCTCGCTTGCGAGTCTCATATTCTTCTTCTCCTGCTGCGGT  
TGTTGCTGCTGCATCGTCTGGGCAAAGTTACCCAGTTGGTAGCCCATCGTCTACCACAGCGCTGACAAAGCCTCGCAAGC  
GTTGGACACCTGAGCTACACGAAGTCTTTGTAGAAGCGTCAGTAAGCTTGGCGGTAGCGAAAAAGCTACGCCAAAGGGA  
GTCTTGAAGATCATGAACGTGGAAGCCCTAACCATCTATCAGTCAAAGCCACTTGCAGAACTGCCAGATAAGATATAA  
ACCAGAACCTCGGAAGGAACATCGGAAAAGAAGTCCACCAGTGTGATAGAGATGCCATCGTTGGACCTGAAAACGACTA  
TGGGAATAACAGAAGCGCTAAGACTGCAGATGGAAGCACAAAAGCAGCTTCATGAACAACCTTGAGATCCAAAGAAAGTTG  
CAGTTGCGGATTGAAGAACAAGGTAAATACCTCGAAATGATGTTTGAGAGGACGAAGGACATTGGGAAAGATTTCAAGGT  
ATCATCATCAATAACAGATGAACATCCTTCACCATCAACCGAGCCAAAGCATTGCCTCCCAACGACAAATCAGAAGCAC  
TCGAGAAAGATCCTGTCAGTTTGAACGATCGTTCAATCACCGGACAAGAAAGCTCGTGA

>CcPHR4 |Locus\_ID=BC332\_14379 |CDS\_len=300 |strand=+  
ATGGGAATAACAGAAGCGCTAAGACTGCAGATGGAAGCACAAAAGCAGCTTCATGAACAACCTTGAGATCCAAAGAAAGTT  
GCAGTTGCGGATTGAAGAACAAGGTAAATACCTCGAAATGATGTTTGAGAGGACGAAGGACATTGGGAAAGATTTCAAGG  
TATCATCATCAATAACAGATGAACATCCTTCACCATCAACCGAGCCAAAGCATTGCCTCCCAACGACAAATCAGAAGCA

CTCGAGAAAGATCCTGTCAAGTTTGAACGATCGTTCAATCACCGGACAAGAAAGCTCGTGA

>CcPHR5 |Locus\_ID=BC332\_14389 |CDS\_len=1218 |strand=+

ATGTTGCGTTTCTGCCTCTCTAGTTTCTTCTGCAATTTGAAATTCATGGAGATTGTAATCTGCGCATTGCAGGAACATC  
GGAAAAGAAGTCTACCAAGTGTGATAGAGATGCCATCGATGGACCTGAAAACGACTATGGGAATAACAGAAGCGCTAAGAT  
TGCAGATGGAAGTCCAAAAGCAGCTTCATGAACAACTTGAGATCCAAAGAAAGTTGCAGTTGCCGATTGAAGAACAAGGT  
AAATACCTCAAAATGATGTTTGAGAGGACGAAGGACATTGGGAAAGATTTAAAGGTATCATCATCAATAACAGATGAACA  
TCCTTCACCATCAACCGAGACAAAGCATTGCTCCAAACGACAAATCAGAAGCACTCGAGAAAGATCCTGTTAGTTCTGA  
ACAATTGTTCAAGTTCAAGTTCAGGAGGAAAATCACCGGACAAGAAAGTTTCGTGAAGATCACGACTCAGATGGTGGAGAC  
TCGTGTTGTTACCTCCGTCAAAACGAGCAAGAATGAAGAAAGGAGGATGACTACTCCTGATGATGCTGAAACAAAAGT  
CAAAGTGAAGATATTATGAATGCAGCTCAAATACATCTAGTTGTGCCACACTACTAGTGACGGTCACATTCGCGGCCG  
GTTTCACATTACCGGGAGGTTTTGAGAGCGATCAGATAGCCCTAACAAAGGAATGGCGATTCTGACGAAAAAATCAGCA  
TTCTGTGCTATTGTTGTTACGGATGCCATTGCCTTTGTATGCTCCGAGGTGCTGTGTTTAGCTACTTCGTCATGGCTGC  
GAATCACCGGCCAAAGACCGCAAAAGAGCTGAGAGTTCTGATGGACATTTATAGAGTTGCAACAATTTTGCAGTTCCCTTT  
CAATGTTTGCAGTTGTAATTGCATTTATAACTGGGAATGGGTGAAGAGACATGAAGCTTTTAGGGATCGTTTGGTACGA  
GGCATAAGGAATAATAATCTCGAATGAAATATGAAGATCAGTTTATCCGCGTATGCTGCTGAAATGGACAGAAGCTGC  
AAAATACTTGCATCTCGTAAACCTCTGCATATATAACTGTCAACTATTATAGTTACAGTCATGCCGAAGTAGGTTCTT  
TAACTACGCCTGCTTCAAGGAAGAACAATCATAACCGAGCAGAATATAACGAAAGAGATGCAGCCAATGATACAGACAGC  
AATGGCTGGACCAACTGA

>CcPHR6 |Locus\_ID=BC332\_26869 |CDS\_len=1272 |strand=+

ATGAGTATTCAGAACTATGAGTTACCAAGTGATTACAACCTGGAATTCACACAGATGGGATTTTGTTCAGCCGGAAAA  
TGATACCAACAGCTACAGCAGCAGCAAAATTTGTGGCCTAGTAATGATTCATCATCATCAAGAAGTATGATAAGTC  
GAATCGGATCGTCACCTTCAGGTTTTTTGCTACTGAGAGGTACCTTGATTAACACAATATGAATACCAAGACAACAAT  
AACACAATAGTTGTTCTCAACTGTCAAAGAATCATGATCCTCAAGTAGCGGCGTTTACTCAGCAATGTGGAAATGGATT  
CTTGCTCACTTCATCATCAGCACGAGTTGACACCGATATTCCAAAGATTTCAATGCCATCATTATCAGACCACTTGATT  
CTCATGGACTCTATGGAATCCTTTTAGTAATCTATCAGAAAAAGAGAGGGTTTTGCTTCTTAAGAGAGGTACGCGGTTT  
AAGCCTTGAAACAGCCTCTAGCAGAAATGCAAGGTAAGGCTGCGTACGATACACCCTTGTTGGTGGGGCCCTTCCCCGGA  
CACCGCGCATAGCGGTAGCGTTAGTGACCGGGTTTCCCTTTATGAAAGTCTCAAATAATACATGTGGTTTTAACTTGG  
TACATATAAGGCAACAATCTGGAAGTCAATCAGCAAATAGTTATAACAACCTCTGGATGTTGAGGAGGATCTTTATCGAGT  
AAGACACGAATCAGGTGGACTCAGGATCTCCACGATCGATTTGTTGAGTGTGTAAACCGTCTTGAGGAGCTGACAAGGC  
GACGCCAAAGGCAATACTAAAGCTGATGGATTGAGAAGGCTTAACCATTTTTCATGTAAAAAGTCATCTTCAGAAATATC  
GAAATGCAAAGTTCATCCCTGAATCGACAGAAGGAAAACTGAAAAATGGACAAACAGAATAATGTGACACAGATCGAC  
GGCAAACTGGAATGCAAATCAAAGAAGCACTGCATATGCAGCTAGAAGTCCAGAGGCGTCTTCACGACCAACTAGAGAT  
TCAGCGAAAGTTACAGTTGAGGATCGAAGAACAAGGGGAGCAACTGAAGAAGATATTTGAACAACAACAACAACAACCA  
GGAGCCTCTTGAGACGCGGAATTCAGCATTTTATCTCATGCTGATCCGTTACCCACACGAAGATGAAGTTTTCGTT  
GAAGAAAGCTTCGATAATTCCCATTTCCAATCTAAAATAAGCTACAATGACATGAAACAACATTTGTTTGA

>CcPHR7 |Locus\_ID=BC332\_26620 |CDS\_len=792 |strand=+

ATGTCATCATATGATCCTCAACAATGTCGAAATGGATTCTTCGAAGACTCAATGGTACAATCTGAGCCTATTTCACTGCC  
ATCATTACATAAGTCTGAGGGACCTTGACAGACAGTACACTTTTTCCGATGCATCGGAAGAAGAGAGGATGTTGCATCTGA  
AAAATAAGTTGTTGGGAGAATTCGATGCTTCATATCGGAGGCACCCTGCGTTGCCTTTTGATGGAATCAAGATTACTGT  
CTCTGTCAATGATTGTTGCTGCTCTCAATTGACATGTATGCAGCAACAATCCTCGAGTCCTTCACTTACTTGTCTAACTC  
TGCATTTCTGTTGCAACAGAGCCTAGTAAGACAAGAATCAGATGGACTGAAGATCTACACGATCGATTTCTTGAGT  
GTGCAAAATCGCTTGAGGCGCTGACAAGGCTACGCCGAAGCAAATACTAAATCTGATGGACTCAGAAAGCTTAACCTTT  
GATCAAGTTAAAAGCCATTTGCAGAAATATCGTAATGCAAAACATCCAGAATCTGCAGGGAAATCTGAAAAGAGAAACAG  
CCTGGATACTGTGACAGATATCGAGAGCAAAACCGCAACAGAAATCACCGAAGCACTGAAAATGCAACTAGAAGTACAAA  
GGTGTCTTCACGAACAACCTAGAGAATCAACGAACATTACAAACGAGGATCGAAGAACAAGCAAAAAAGTTGAGGATGATA  
CTTGATCAACAGCAAAACACAACAGGACTGTTTTGAGACGAGAAATTCAAACGTTTCATCTGATAATTAG

>CcPHR8 |Locus\_ID=BC332\_16139 |CDS\_len=999 |strand=-

ATGTATCAGCCCAAAGGCGTTTCTACTTCAAGCTTAGCCCCACAACAATGTTGCTGTCAATAATCAGTCATTAGACTGTGC  
CGGCGGCTCAATGGACCCGATCAGTGGAGGCACCAACAATCCTAGTCTTGCTCAAAGCAACGTCTGCGTTGGACCAATG  
AGCTTCATGAACGATTTGTTGATGCTGTAGCACAACTTGCGGCCCGGATAGAGCTACACCGAAAGGTGTTCTTAGAGTC  
ATGGGTGTACAAGGGCTAACCATTTACCATGTAAAAAGCCATTTACAGAAATATCGACTTGCTAAATATCTTCAGATTC  
CTCATCTGATGGGAAAACTCTGATAAGAAAGAACCAAGAGATATGCTTTCAAGTTTGGATGGTTCATCAGGAGTGGAAA  
TCACTACGGCTCTAAAGCTGCAGATGGAGGTGCAAAAGAGACTGCATGAGCAACTGGAGGTCCAAAAACAGCTACAACCT  
AGAATAGAAGCCCAAGGTAAGTATTTGAAGAAGATAATCGAAGAACAACAGCGGCTCAGTGGAGTTCCTTCAGAAGTCCC  
TGGTTCTGGGGTCACTGCTCCCCCACTGGTGACAATGGCCAGAATCTGATAACAGGACTGATCCAGGGACTCCTGCAC  
CGTCATCTGAGTCTCCTCATGTTGATAAGCCTGTAAAAGCACATGCCCTAACAAAGAGCCTTTCTATGGATGAATCGTTC  
TCCTCGCATCATGAGCCTCTCAGTCCAGATTCTGATTTCCATGAAACTTCGCCTATAGAGAGCCCTAACGGTGAGAGGTC  
ATCAAAGAAACAAAGAGTGGGCACAAGTGCAGCATTACAAAAGACAACATGGCACTTCCACATCAGATATTGGAATCAA

>CcRVE1 |Locus ID=BC332\_07817 |CDS len=2682 |strand=+

ATGACAAACGGCAAGAGAGCAGAAAAAACAAGGATATAATGGAATTGAAGGATGATGTTTTAGTTTGGGAGATCATCTC  
TCGCTTGCCCTTGAAGTTGGCAGTTCAATGTAAAGTTCTAAACAAGGATATTAAGGGTCGAATTTCTGATCCTGAATTTT  
TACGAAC TTGGTTTCGACGCCAGGAAGATCCTTCTACAGAACTCATCTATACATTAAATGGGAGGCACAGATCGCTCCAC  
AAAATCACCTTATACCTATCCCAAACACTCAAATGGAGACGCCTCTCTCTGTGATATTGAGATTTTGGCCTCATGCAA  
TGGTCTCATTCTCATTGACTTTGATCGTGTTACGAAATACTGTGTTTTCAATCCCCTAACTGGAGAGCACCATTGATAC  
CATACCCGCTGATGCCTTCAAATAGGCTTCATAGTATGGGCTTCGCTGTTGATTACCCGGATTGAGATCAATATAAATTG  
GTAACCATCAGTGAACGCGTTAAATATTCCCACAGGTTCTACAAATTTAGCCTACTGTATCGCAGCAACCTGGCTTCTG  
GCATGAAATCCAACAGGAAACCAGTTCTTTAGGCCTTTTCTGAGGGTAATCCACCTGTTTATTGGTGTGGTTCTCTGT  
ATTGGCTCAGATGTGAGGGTAGTGTTGTAGCATTGATACGAGGAGACAAGCGTCAAGAGTAATTGAAGCTCGGTTTATT  
CCTCAATATGATTTCAAGTATGGTAATATTAGCACTGGTAACAATATGAGGCTAGGGACGGCACAAGGTGTACTTACCCT  
TGCATGCATTTTCAGAAGGCTCATAGTCCTCGCGACTTATGATAATGCACGTAGTAGTTGGACGGTTACTCACACTGTGG  
ACAAC TTTATTTCTCGTATGAGCGGCTTTGTTGCTGGCTTTCCAGTCTGGATCGACAGCAAGCAAGTGTCTTTTCTTATG  
GAGCGTCCCTGGGTAGTGACACATTATTGGGATCTATATGAGTATGATACTGAGATCAATGGGTACCGAAAAGGTGCAGA  
GTGGCACTCAGTTGGTTATCCCATGTATTACTTCCATCCAACGTTAGCTTCTGTCCATCAAGCGCCCTTCAAAAATGTAG  
AGGCTGATGATCTGTTGTATATTGCTGCAAAGTTGAATTACATCAGAGGATTTATTATTGAAGGTACCAGTCAGTTTCAA  
AATCAAGCTGAGGGGGCTTGGAAGGTGCCTCATCCGTGAATAGCTCAAAGTTGGAATTGTGGCTACTCAGGAGAAGGC  
ACCGACTTGTCTTGCCAATAAAAATGCTTTAAAGGTTAGGAAGCCTTATACCATTACTAAACAGAGAGAGAAATGGACAG  
AAGAAGAACACCAGAGATTTCTGAAGCCTTGAAGCTGTATGGCCGTGCTTGGCGCCAAATAGAAGAATATGTTGGAAGC  
AAAAC TGCAATTCAAATTCGTAGTCATGCACAGAAATTTTTGCAAAGGTTGCTCGAGATTGAGTTAATGATGGTGATGA  
ATCCCTAAACGCGATTGACATACCTCCTCCTCGGCCAAAGAAGAAACCTCTGCATCCATACCCTCGCAAGATGGTTGATT  
CCCCTGTAGCTAACAAAGGCAGTTTCAGGTGAGCCTGAAAGCTCTCCTTCCCCAAATGTATCAGGAAGGGTGAGTCGTTCT  
CCAGATTGAGTTTGTGAGCAATCGGTTGAGGTGTTTCTGAATATCCAGTTGCTGAGCAGCAGAACTCTCGCTTTTACC  
AGCCTCTTGACTACAGATGTACACACTGCAAATATAATTTCTGCAGAGAATGATGATGAAAGTATGACCTCAAACCTCA  
GCACCGTGGAGGAAGTCCATGTTGAATTAACCAATATCTGCTAGTACCAGCCGATTGCCAATTCTGACATGGTAATT  
CCTCTTGAAGCCTGTAATCTATCTGCTTTACCATGCTATTTAGGCTGTACACTTACCTCAGGTTTGTATGTTCTTTGCA  
GGAATGTGATATAGTTCATAGGGAGAATTCATGTAATGGTGAAAAGCTAGCTGTTGAAGCACCTTCAGCAAGTATCAAGC  
TGTTTGGACAGACGGTTTTCATACCAGATGCCAATAACCTTGCTCTGCGAGCTCCATACAACCTGCAACTCATTGCCATCT  
AAATCCACAGAAAAGGAAATCAAGATCAGCAGTGAAGATGTACTTCACAGCTTCCAAGCTAACCAAGCAAATTCACAGTT  
TATGCTCGCCATGGTTCCAGGCAATATGATTCCACCAGCTTCTTGGTTGTCTCACAACATGCTTGAAAACAATCCTGAGA  
TTACTACTGTTTTCCCTACTACAGTTTCTTGGTGGTCTGGTACCAAGATCTAGTAAATCGATCTATCTTATCGTGTGAC  
CAAAAAGCCATGGAGACTGCTGTTCAATTGTGAGGGACCGAAAGATGAAGAACCCCAAAGAGAGGGATCATCGACTGGTTC  
AAGCATCGGCTCAGCTAGTGAAGTTGACGATGGAACAGGAGTTCTGAAACAGCTGAGTCCAAATGTACAGCCAAGAGCT  
ACAAGTGGAACAACAGTAAGGGATTTGTACCATACAAAAGATGTTTAGCAGAGAGGGACGACAAGTCATCAGGAGCTGTT  
TTAGAAGAGAGAGAATCACAACGGGTTCTGTGTGTGTTTCATAA

>CcRVE2 |Locus\_ID=BC332\_03406 |CDS\_len=1521 |strand=+

ATGCAGCTCATGGAGTGTAGAGTAGGTTTGGATCATGGCTTGACTGAGATTATCGTGAAAACCTGACACTGGCTCTAGACA  
ACAGCTAATTTATCGGGATCAAAGTGAGTCGGACACTACACCTCCCAGCAGAAGTAGGATCTCACTTGCTGTGGGAGCTC  
GCATTGAGCTTGAAGAGCAAGTTACTCCAGCAGAAGAATATGCTCCCAAGATAAGAAAGCCATACACCATTTCAAAGCAA  
AGAGAGAGGTGGTCAGAGGAAGAACATAAGAAGTTCTTGAAGCTTTAAGGCTGCATGGTAGGGCATGGCGACGTATAGA  
AGAGCACGTGGGCACCAAACTGCAGTTCAGATCAGAAGCCATGCTCAGAAGTTTTCTCAAAGGTTGTTGCGTGAATCGA  
ATAATGGTGATGCAAGCTCTGTGAAATCCATTGAGATCCCTCCTCCTCGGCCTAAAAGAAAACCAATGCACCCCTTATCCA  
CGTAAAAATGGCAACTCCAGTTAAAAGTGAACCTAGCTCCAGGGAATTTGAAGAGCTCTACTTACCTGATCTCTGTCT  
CTCTGAACAGGAGTACAGTCTCCTACCATGTGTTGCTGCCCTAGGTTCTTTTGCATTTGGCACTGTACATTCCAGTA  
AGCTAAAGTGAGCACTCATCACCTGTTTCATCAGATGTTGCTGAAAATTTCTGGTGATGTTGTACTTTCTGAACCATCCGAT  
ATCATTCTTGAGGAGAGAAGATCTTACCCGCCGAGGTTATGCTAGTTCAAATCAAGACAACCAAGTCTTGCATGAAACT  
AGATTTGTTTTCCGGAAGACAATGATTTTGTGAAAGAAGGCTTAGATGAGGCATCATCCACGCAGTGTGTTGAAGTTGTTTG  
GTAAAACCTGTATTAGTCACTGATTCTTATAAGCCATCTTCAACTTGTGGCGAAATATTGCTGACAGATGAGAATGATGAA  
CCAGCGTCACCGACATTGCCTCAAAGCTCCGTCCCTACGAAATATTTGCGCTGGGGTTCAGAATGTGCCCGAAGTACCTC  
AACTATTGGACTCCCTGCACAATCATATTACATCCCCGCACCAATGGAAGTTGAGGACCTAATCAAAGTACCCTTCCC  
CTCTTTTGGCGTGGGGCTCATCATATGTATCTGATAAATTTCTTGTGCTAAGGTGCATAGCCCAATTCGAATCAAGGGA  
TGTCCTACTCTTTAATGAAACAGGTTTGGATGATAAGGAACTCAAAGGAAGGGTCTTCCACCGCTCCAACGCAGAATC  
AGCAGATGTGGAGTCGAGTGGAGACACGAATTTGAAATTTGAAGCTCAAAGTGGAACGGCAATCTGGTTGTAGTGTCCG  
TCAGAGTCAGTGATCCCCCTCTGTTTGAGCGAAGAGCAAATTTACAAAGCGTGTGGAGGGTTTTGTTCCATATAAGAGA  
TGTTTGGCTGAAGGAGGCATCAGTTCTCAACAATAACCGGAGAAGAAAGAGAGGAGCAACGAACCCGATTATGTTTGTA  
G

>CcRVE3 |Locus\_ID=BC332\_26256 |CDS\_len=864 |strand=+

ATGGCCAACAACAGTTCAACTCCCACCGACGCATCCGGTAAGAAGGTTAGGAAACCTTATACAATAACAAAATCAAGAGA  
AAGCTGGACTGAAGAAGAACATGACAAGTTCTTGAAGCTCTTCAACTGTTTCGACCGTGATTGGAAGAAAATTGAGGATT  
TCGTAGGCTCAAAGACAGTAATTCAGATTGCGAGTCATGCCCAAAAATACTTCTTGAAGGTCCAGAAGAATGGTTCAATA  
GCACACGTGCCACCACCTCGGCCAAGCGTAAAGCAGCTCATCCATATCCACAGAAGGCACCAAAAAATGTATTGGTACC



AATCCAACAAACATTCTCAAACAGCACCAATCGCTCCCGTTGGAGTTGGCATATATGGAACAACCACCATCGGACAACCA  
TTCAACACTACATCCGCCTCTGTTGTTGGTACACCGGTGAATCTTGTTCACCGACAAACAAGTCATGCGGTGTCCAACC  
TCCAATACCAGAAGCAGTGGTTTCTGGTGCTTACAATGAAGCACAAATCTACACATTAGTGACATTTTTGAAACATAAGC  
GTACAAAGTCAAGTGAAGAGTCTTATGCTTATTCATGTTTAGTGCTATCTTCTTCAGTGGTGCATGAATAA

>CcTRF1 |Locus\_ID=BC332\_22999 |CDS\_len=1548 |strand=+  
CAGAATTCAGCATTTTCAAGTGGTCTTGCTTCTCTAGGGGTCTGGTTTGATGAACCAGAAACCCGTGACGATCATGCTTC  
TATCTCTGGTGCCTTGTGTTTTGATGAGAAGAGGGTATTAAGGGGCATGGAAAGGAAAGGTGCTTTGTACAATATAGGTT  
CCAGTATTGCACCTAAAAGGGAAAAATGATATTAACCACGAAGTGCTTGATCTTAAGCAAAGTCAATTTGAAGCTGGAAAA  
GTTCAAGCACAAAATGATCTTTCCACTCCATGTGAAGATTATCTTTAGATATTGAATTTGCTGAAAGCATCACAAATCT  
GGATTATGGTTCAAGTAGAGGATTGCTGGACCCTATTTTAGAAAGTCAGATTACATTACCTAGTTGTGATGGAAGTACT  
CATGTGGAATGCCATACTCTTCAGGATTAGTTGCGCAAGAAGCTCAAAGTCAGAATGCTATGTTTGGCCTTACCAATTCA  
GAGTTGCATGACCTTTCTACCACAAGTGTGAAAGTCGGATACTAGTTGAGTACAATGCTGTGAAATTTCCAACTGCGTT  
CAATCCAGGAGATATCAGCAATGTGGATGATGTGGCAGACTTCTTTGCTGAAGCTGTGTCTTCTGAGAAGATGAATGACA  
GCATGATTGACCATTCTGCACTAACATCTAACGGAATTTCTTTGATGTCTAATCCTACGCAAAATGAGGGGCAAGATGTA  
AACTGTGAAAGCTTTGATGTGCATGAATCCGCAGTTATAGGCCCTCCAGTCACTTCTCAAGTGATAAACGTTGACACTCC  
TGTCACCTCAAAGCGTCTACGCAAGCCTACACGAAGGTATATTGATGAATCCTCAGATCTGAATGCTAGACGTTCTAGGA  
AAAAGACTGAGGTTTCTACTAGTGACCCAGAATCAAAGAATAAGTTTCTCAAAGTCAGATGTCAAAGAAATCTCGTGCA  
GAGTCTATGGAAATGGAATTGTTTTCCGAGGAGTCTTCTATAAAGCTATTCAAGTGCCTTTTGCTTCTTGTGAACGA  
AGAATGTGATGAGAGGCCTGCATCCAATGCAATACAGGTTTTTAAACCTCACAAGGAGGATCTTCATAAGGAGCCTATGG  
TTGTGAATCCTAAAGATGATGCCGTTGCGCCAAAGAAGTTGGATCAAGATGGTGCCCGAGGAAACATCACCGGCTCTGG  
ACTGTTTCAGAAGTCAGAAAGTTGATTGATGGAGTTGCCCAATATGGAGTTGGAAGATGGAGTCATATAAAGAAGCTTTA  
TTTCTCATCATCTGGTCATAGAACACCTGTGGATCTCAAGGATAAATGGAGAAATCTTCTTAAAGCATGCTATCTCCAGA  
AACAAAGCAAATAACGGAAGGGTAAACATAATCTGTCTTGCGACCTTTGCCCAAGTCTGTCTTCATCGAGTCGGT  
GAACTGGCCAACATGCATCCGTATCCAAGAAACCGGAGATGCGAGAGTTCCCGTTCTCCATGTGCCTCACCTTCTCCCGA  
GCATTTTAAACAATACTAACATCCAGTGA

>CcTRF2 |Locus\_ID=BC332\_09582 |CDS\_len=1821 |strand=+  
ATGGATGCAATTGAAGCCAAACTGAGGTTAGTGTTGTTCCGGTAACGAACACCTTTGGGGCTTTGGAGAAGGAGATTAC  
TGATCCTATTGTTTACCAGCTTGTCGGGTTGATGGCGATGGGAGATTAGTCCCGGCAACTCAGGATGAAATTATGGTGG  
TTGAGGACTTGCTTGAAGATGATAAGTGTGAACCCAAGCTTGTTCCAGATACCAGACAGATTTCCGAATCCTGCATAACT  
GAGGGATACCTTATGGCGAGAAATTTATTTCAAGTTCAGAAAGAAAGTCAAATGTGTTAGTTGATGCAGTGCCTGACTT  
GGGAAACATAGACGCTCCTGAAAAGGTGGCTGTTTCATGGATTGAATCCTTTCTCAGAACTCAGCGATTTTGACCAATCTG  
TGAGGACTGAAACATGCTTCTTTCCAGGATGCATCAAATGAGGATATGCCATCAACCTCTGCTGCTGGTTCTAGTTGG  
AAGCCTGACTTTTCAAAGTTGGAGGGAAGATATGTTTAGACAGCCTAACAGTTAAAGAACTTCAGGAAACTTTTAAAGC  
AACTTTTGAAGGGAACCTTCTGTCAAGGACAAACAGTGGCTTAAGAGGAGGATTACCATGGGGCTGACTAATTCGTGTG  
ATTTTTCATGCACTACTTTCATAATAAGAGATAATGTAGTGGTGAAGAACGGTGAAGAACAAATATATCATCGTGTAAG  
AGTAGAATTTCTGCAGATTCTGAAGATGGAGTGGCAAATTCAGACTCTATAGGGTCATTAGGTGATCGTGATAACAGAAT  
AAATGATGATGCTGATCTTTGTGGCGAAGATGTTTCTACTTCAGCCTTTGAAAGTTGTAATGTTACTAAAGATCTGGACA  
CAGAGCAGAGAACAGCCAAACGAGCTCGCAAGCCAAACAAAAGATATATTGAAGAACTTTCTGAATTAGAATCTAGGGAA  
TCCAGTGAAAAGTTAGCGTCACCAGATAAAATCTCCAGATACCGATTTGCATGTCCACAACTCATATGAGGCCACCAA  
AAATGTGAGGTCAAATGCGAGACCTCTGGTCACCAGGGAAGATTCTTTAGGAGGTTCTGGGATTCAAATTCGGTTTGT  
CTCGGATTCAAGGAGCCGTCGCGTGAGAACTTCAATGCCTCTTTTGAACCTTCAGCCCTGTGGTATGGACATGGTGACC  
AGAAAAGTAAACGAGTCTTTTGTATGATCTGGGCCACAAGAAGATGATAAGAGAAACAATGACCTGATCAAGTCAGCTC  
ATCTCCTGGGTGGACTCAACAGCCTCTTATTGCTGCTTGTGAAAAGACGATCACTACAGTGGGATGAAAATTGTTGAGC  
TGGAGAATGACGTAGAGCCGAATGACTGCTCTGAGTACAATTCGGATGATAATGTGGTGACTGTACCCACCCAAAAAGGA  
GGAATGAGGAGAAAACATCATCGACCTTGGACTATCGATGAGGTTGTTAAGCTTGTGGAAGGTGTAGCCAGGTATGGTGC  
AGGTAGATGGTCTGAGATAAAACGGCTTGCTTTTGGCTTGTCTTATCGAACTTCGGTGGACCTGAAGGACAAGTGGA  
GAAATCTGCTGAAAGCTAGTTTTGTGCAGTTGCCTGCTGAAAAAGGGATTCTGAATTCGGGAAACAGGCTTCAGTTCCG  
ATCCCTGCTGCTATTCTCCGGCGTGTGAGAGAGCTTGTGATATGCAAGGTCAGTTCCACCGGGTCTCAGTACAGGGAA  
GTCAAGTGGACATAGTAGTAGCATAGAAGTGTACATGATGCTAGGTCTGGATTCTGTAA

>CcTRF3 |Locus\_ID=BC332\_29142 |CDS\_len=1689 |strand=-  
ATGCAAAATGCTATTGATCCGTTTCGAGTACAACCTGAACACATCGAATGAGAGTGAATGAGTTTTCAACAGGAGCCTGA  
ACAGGTAGTAGGCGCTGCATCCGTTTATTTTGCATTGGAGGAGGAAGCAATAGGAGTGAACAACCTATTAGCAGAACCTG  
AGTATGATGATATACTTAATACGCTTCTAGATTTTAAACACATGTGCATTAGTGTTCCCGAGAGCTACTTTAAGGAGTTT  
TCAGCTTCGGATACTGTCTTAACAAAAAGTGACTGTGGTGCACCTCAAAGAAGTCATAATGAAGGGGATAAAACAAAGGA  
GAAGTTTCTTGATGGATTGTCAAACGGAGATGATGAAAATCATTGCTTCATTTTCATGTGAAGATTATCTTTTGGATATTG  
AACTTGAGGAAGACACTCCCACCCTCCATGATGTCAAGAGATATATCCTGTATAGAGAGTGTGAATTTGGAGAACCAG  
CTAGCTGATTGAGATGGAAGAGACTGTGGCGTTTCATGTGTTAACGTTATCTGGTGCAAGTACCTCATCTGATCACGATGC  
TACGATATTAGACAATTTTGATTGCATGTCAACTGATAAACTACTCAAGGTGTTGAGGAGATGTTGGGACATCAAATC  
CAGTTTCGGATAACCAATGGCTGAAACCCACATGATAGCTGGCTTGAAAACAGGAGATATCAGACAAGAATTTTCAGT

TTTCCAAAACGCTCTCTTGATTGAGTGAAAACCAAGGGGTAAAAGTCCCGCCAGCAAGTTGCCAAAATCTCCTTACAAT  
ATCTACTGCCTTTTGCTAGTATATTTACTTTTCAGAAGAAAGCCAAGAGTTCAACAAGTGAAAAGGAGAGGGCGTATCCAAT  
GGAATTCCTTCAAATCCTTATCTTCTGTAGCAGGTGAAATACATCTCGATTGCCCGGATAAGTGGGCTAGCAAGGAGTCG  
GCTGAAGAAAAATGTAAATGTGATGGAATGAAATCAGGAATATCTGAACAGTATTTGAAATGTAAACCTTCGCGAAGAGG  
ATTCGGTCGGCGATATTACCGCAGAGGAGCCACAGTTACATCACAAGGTCTTGGTAAAAGAAATATTCTGCCCACTGAGG  
ATCAGCTTATCAGGAGGGAGGGACATTTATCCAAAGATTGCAAAGCGAACAGAGCCCATGACGACAACATCTATTAGCT  
GAGGCACAAGATGATCCTTCTGGCACTCTTTCAGACCAGTCTAGTGATGATACATCTGAAGATGATTGGACTATAGGTTG  
TGAGACCCGAGGCACTAAACAGGACCGAAAACGCAACAATTATTGGTCAACACGTGAGGTTCTAAAGTTGGTGGAGGGTG  
TTTCCGAGTATGGCGTTGGCAGATGGAGTGACATAAAGAAAATGTTTTTCCCATCCTCAATGCGTCGTAGTCCAGCTGAT  
CTGAAGGACAAATGGCGGAATCTTTTGAGGGCTAGCTGTGCAAGATTGCAGAGCCGGAGAGGGGTTGATGCAAAGAAGAA  
GCACCGCATGCGCTCGATTCTCAGAGTGTGTTGAACCGCGTTTCGAGAGCTTGCTGTCTATCTATCCACATTGCAAGCAAC  
GTAGATCAAGAATCTCATCAACTGCATCCCGCTCCTTTCTTCGAACGTGAAGTTGATAACCATTTACCAGTGCTTGCC  
TATGAATGA

>CcTRF4 |Locus\_ID=BC332\_26430 |CDS\_len=1671 |strand=-

ATGCAAACCTGCTATGGATCCGTTTCGAGTACAACCTGGAGCACATGGAATGAGAGTGCAACGAGTTTTTCAACAGGAGCCTGA  
ACAGGTTGTAGCTGCTGCATCCGTTTATTTTGCATCAGAGCAGGAAGCAATAGGAGTGGAACAATTATTAGCAGAACCTG  
AGTATGATGATATAGTTAATACTCTTCTAGATTTTAAACACATGTGCATTAGTGTTTCCCAGAGCTACTTTAAGGAG  
TTTTCCAGCTTCGGATACCATCTTAACAAAACTGATTGTGGTGCATTCAAAGAAGTCATAATGAAGGGGATAAAAAAAA  
GGAGAAGTTTCTTGATGGATTGTCAAACGGAGATGATGAAAATCATTGCTTCATTTTATGTGAAGATTATCTTTGGATA  
TTGAACTTGAGGAAGACACTCCACCCTCCATGATGTCACGAGAGATATATCCTGTGTAGAGAGTGATTGTTGGAGAAC  
CAGCTTGTGATTGAGACGGAAGAACTGTGGCATTATGTGTTAACGTTATCTGGTGCAAGTTCCTCATCTGATCACGA  
TGCGACGATAATAGACAATTTTGATTGCATGTCAACTGATAAACTACTCATGGTGTCCAGGGAGATGTTGGGGCATGAAA  
CTCCAGTTGCGGATAACCAATGGCTGAAACCCACATGATAGTTGGCTTGAAAACAGGAGATATCAGAAAAGAATTTTC  
AGTTTTCCAAAATGCTCTCTTGATTGAGTGAAAACCAAGGGGCAAATGTCCCGCCAGCAAGTTGCCGAAATCTCCTTAC  
AGTATCTACTGCCTTTGCTAGTATATTTACTTTTCAGAAGAAAGCCAAGAGTTCAACACGTGAAAAGGAGAGAACATATCC  
AATGGAATTCCTTCAAATGCTTATCTTCTGTAGCAGGTGAAATACAGCTCGATTGCCCGGATAAGTGGGATAGCAAGGAG  
TCGGCTGAAGAAAATGTAAATGTTGTGGAATGAAACCTGGAATATCTGAACAGTGTCTAAAATGTAAACCTTCGCGAAG  
AGGATTTGGTCGGCGATATTACCGCAGAGGAGCCACAGTAACATCACAAGGTCTTGGTAAAAGAAATTTTCAAGTTGGAT  
TTGATCAGCTTATCAGGAGGGAGAGACAATTATCCAAAGATTGCAAGGCGAACCGAGCCCATGACGACAACATCCATTCT  
GCTGAGGCAAAAAATGATCCTTCTGGCACTCTTCTGACCAGTCTAGTGATGATACATCTGAAGATGATTGGACTATAGG  
TTGTGAGCCCCGAGGCACTAACAAGGACAGAAAACACAGGAAGTATTGGTCAACACGTGAGGTCCTAAAGTTGGTTGAGG  
GTGTTTCCGAGTATGGTGTGGCAGATGGAATGACATAAAGAAAATGTTTTTCAATCATCAATGCGTCGTAGTCCAGTT  
GATCTGAAGGACGAATGGCAGAATCTTCTGAGGGCTAGCTGTGCAAGATTGCAGAGCCGGAGAGGGGTTGATGCAAAGAA  
GAAGCGCCGCATGCGCTCGATTCTCGGACAGTGTTAAACCATGTTGCAAATCTTGCTGTCTATCCATATTCGATGC  
AACGTAGATCAAGAATCTCATCAGCTGAATCCCTCGCTTCTTCTTCGAACGTGAAGTCTGATAACCATTAA

>CcMYBR14 |Locus\_ID=BC332\_32768 |CDS\_len=900 |strand=-

ATGGGGAGGTATCCATGTTGCAATTATGATTATAGTGATTTAAAGAAAGGGCCATGGACAAAAGATGAAGATGAGAAATT  
AATTGAATATACATAAAAAATGGCCATAATAATTGGAGATTAGTTACAAAAAATGCAGGATTAAAAAGATGTGGAAAGA  
GTTGTAGATTAAAGGTGTAATAATTATCTTAAGCCTGGTATTAAGAGAGGTGGATTTACAAAAGAAGAACAACAAATCATC  
ATTAATCTCCATTCTTCTTTTGGAAATAATGCAAAATCAAGATGAAGGACTTATTGCATGGTCTTCTAGAATTGATGGTAT  
TGAATGCTCACTTCCCAATGGTTATCCTTCTATTTCAAGTTCTTGAAGTCCATTGAGAGACCTTCAATAAAATTTGAAA  
CGATACAGAGTAGATCGGCATGTCTCATGTGCAACGATGAGAAGCACAATAACCAAAATGGTCCAAATCTTTAGAATTT  
TGTAAGCTAATGAATCGAATTCAGTGCAAACTCAAGTTGAAGGACTTAATATTGCATGGTCTTCTAGAATTGACAGTAT  
TGAATGCTCGCTTCCCAATGATTATCCTTCTATTTCAAATTCCTCGAAAGTCCATCCAGAGACATTTGATAAAATTGAAA  
CGATACAGAGTAGATCAGTATGGCTCCTATGCAATGCTGACAAGCACAATAACGAGAAATGATCCAAATTCGTCAAAGGA  
ATTCAAGCTAATGAGTTGAATTCAAATCATGTTGAAGGACTTGTTCCCTCTACTTCAAAAAGTTCCAATTTAAACAAAAA  
TTGCATTTCCAAATTCAGAAATTAGATGATATTGATGCATGGGAAATACCTCAAGATGATGAAGCCATAAGTTTCTTTT  
GGAATACTATTTTCAATGA

>CcMYBR15 |Locus\_ID=BC332\_30589 |CDS\_len=729 |strand=+

ATGGGAAGGTCTCCTTCTTGGCATGAAACAGGCCTTAAGAAAGGTCCCTGGACTCCTGAAGAAGACCAAAAACTCATCAA  
CCATATCAAGAAACATGGCCATGGGAGCTGGAGAGCTCTCCCTAATAAACTTGACAGGTCTTAATAGATGTGGAAAGAGCT  
GCAGATTGAGGTGGACTAATTATCTTAGGCCAGATATCAAGAGGGGAAAGTTCACTCAAGATGAACAGAAAACAATTCTC  
AGTCTCCATGCTATTCTTGGCAACAACCTGCCTCATCTTATAGCTCTTGCAAATTTGAAGGAATTAGTCGAACATCACCA  
CTCTTCGTGGGAAGGACAACAAGCTGCTATTGCTATAAGATCACTACAACTGAAGTTGCTACACTTCAATATTTGCATT  
TACTTCTTCAAACCTCAAATATGCCTGCAAACAACACAACCTATTAGTGCCAATATCCCAGAAATTGAAGCTTATAATAAT  
CTTTTAAACTCAATGAAAGCTGACCAAATATTATTGGCAATAATTCTTGAACAATATTATTCCACCACCTAATTCAAC  
TAGTCTTCAAGATTCAATCCCTTTCTCCCATTTGCCTGAATTACAAGCTAGTAGTAGCTTCCACTTATCAACTTCTCTTC  
ATAAAAAAGAAATCATAAAAACACCCACTACTATATACTACTTACCATGGCAGCTTCTTCTTCTCTGGGAGTTGTTGC  
AACAAATGA

>CcMYBR16 |Locus\_ID=BC332\_24180 |CDS\_len=885 |strand=-  
ATGAATGTTGATGATATTGATAATAATAATATTGTTGGAGATGAAGAACAAGATGGAGAGAAGAATAATGACAAAAATGA  
TGGTGTATCAAAAGGAAAATACAATTTATGGAAGAAGAGAGGCAGAAAAAGCATGAAAGATATTAATGAAGGAAGAAGTC  
AAAGCAGCGCTATTAATAACACCGTCAAGAGAAAGGACTGCATAGAATGGACTACAGATCTCCATTTATATTACAAAA  
GCTGTGAAACAACCTTGGTGAAGGAAGATGTTATCCAGCAGAAATTCTTGAAGTGATGAATGTACCTAGTCTTACAAAGAA  
ACAAGTTGTCAGTCATCTTCAGGTTTCAGCCTGGCTTTTACTATGGGGATCATCAGGATTATGGCTTGAATCGACATACTC  
AAAATGGTTACAACCTTAGATATCAATGCGGCCCATGTACCAACATATTCAGTGGTTGTTATCAGTGTGAACCCCGCATGT  
CGAACTAGAGGCATTTGTAAAACAATTATACCATTTCTGTAACCTTCAATCTTGCAAACAGGACATTCTTGCCTTTGGTTTTGGTA  
CCACATCCATATGGTGAATATACATTTTCTGTAACCTTCAATCTTGCAAACAGGACATTCTTGCCTTTGGTTTTGGTA  
CTTTCGGAAGAAATTCTCTGAAATTATATCCATCCGTAGATGCAAGGCCAATAGAGTGGCCTTCCGCGATATTGGCGCAT  
CGCGGAAAGGGCCAAATCCCTAATTGTCTAATTCCAGTGAGGGTCCGTGATATTGGTGCATCGCGCCAAACTTCCAGGTC  
CCATCCAAGGTGGAAACGTGATACGACCACATCGCACCATCGTGTATTACAGTTGGCAATTTCCAGTGGCTTGGCGC  
GATAG

>CcMYBR17 |Locus\_ID=BC332\_15032 |CDS\_len=813 |strand=+  
ATGGAAGCAGTGACGGCAATACTTGGTGGTGGGCTGCGGATTGGTGTGTTTTTCAGGGTAAGAAGGTTAGAGATGACAA  
CAAGACCTTATTTTCAGGCTGGAATTTACATGAGGACAACTTGATGCTCTTGGTTTTACCCTGGAACCTAGCCCTCTC  
GAGCTTCCCCACCTCTAGCTCCAGAAGGTCGTTCTCGTGTACTTCTTGTGAGACAGCTCAACCACTAACAAGGTGCTCA  
CCTGCTCCTACTGTTATTCGTAATGGCATAACAAGGGGACATATAATGGCTTCACGGATCATCCAAGAACAATTTGAG  
TAACTTCATTGATAGCGATCAGGATTCAGCTCCGTCCTTCTGAGAGAAAATGCTGCAGATTCAAGAG  
CATTGGTTCAGTTGCTGCAGTGGATGCAGAAGCCTTGGCTATGGTTCCAATGCGAAAGCCCAAGCGTTCTGAAACCGCG  
CAGCGTCGAATCCGAGACCTTTTTCTGTTTCTGAAGTGAAGCACTTGTTCAAGCTGTTGAGAAGCTTGAAGTGAAG  
GTGGCGTGATGTCAAATGCGAGCTTTTATAACGCCAAACACAGAATTATGTCGATTTAAAGGACAAATGGAAAACAC  
TGGTGCACACAGCGCAATATCCCCTCAGCAAAGGAGAGGTGAGCCTGTGCCTCAGGAACCTTGCAGAGGTCTCTATT  
GTGCATGCTTACTGGTCCCAACAACAAGCTAGGCAACAGATGAAACATCATTCCGAGACGCGTCTTTTGCTTTCAGATGG  
TTGTAAGGATAA

>CcPHR10 |Locus\_ID=BC332\_14338 |CDS\_len=315 |strand=-  
ATGGGTGTTTTCTGGAGCTACGTCGACATCTTCAAACCTCATTCCCTCACAGGCAATCCCGTCAGCATCTAAGAGTCGAAC  
AATCCAAAGAAAGTTGCAGTTGCGGATTGAAGAACAAGGTAAATACCTCGAAATGATGTTTGAGAGGACGAAGGACATTG  
GGAAAGATTTCAAGGTATCATCATCAATAACAGATGAACATCCTTACCATCAACCGAGCCAAAGCATTGCGCTCCCAAC  
GACAAATCAGAAGCACTCGAGAAAGATCCTGTGAGTTTGAACGATCGTTCAATCACCGGACAAGAAAGCTCGTGA

>CcRVE6 |Locus\_ID=BC332\_05079 |CDS\_len=375 |strand=+  
ATGTTTAATTTCAGAGATGTCTCTGATGGTTAATAACGCTATTGCTCCCCGCGATCAAAGTGGAGAAAGTGGGGTGGACTC  
GATCCATTCCAGCAGGAATCAAATTCGTCAGATGTGGGAGCATCATCAACAAGGAGCATCAAGCTGAAAGAGCAAGTTG  
CTTCTGCAGATGAATATGCTCCCAAGGTCAGGAAGCCATACATCATTACAAAGCAAAGGGAGCGCTGGACAGAAGAAGAG  
CATAAAAAGTTCTTGAGGCTTTGAACTGTACGGTAGGGCATGGAGGCGTATAGAAGGTAGAAATGAAAAACGATTAAT  
GTTTATTAGAGACATCTCTTGGTTATCATTGCATATTAACGGAGATCTTGATTAA

>CcMYBR18 |Locus\_ID=BC332\_00996 |CDS\_len=363 |strand=-  
ATGCCCCAACAAATGGACAATAATCGCTCCTATTCTTGGTCGTACCTCATCTCAGTGCATTGAACGTTATGATAAGATTCT  
CGATGGTGAGGGTTGGGAACGAGAAGATGATGAGAACTTCTTACCTTGCAAAAATCATGCCCAACAATGGACAATAA  
TTGCTTCTATTCTTGGTGTACATCATCTCAGTGCATTGAATGTTATGATAAGCTTCTCGATGGTGAGAATTATGACAAA  
TTGCTTCCATGGGAGATTGAGTCACATCCAGATCAATCAAAGCCTGCACCTCCTGATCCTATCAATATGGACGATGATGA  
AAAAAAAAATGCTTCTCATGCACCGCAGATTCCCGACTATGA

>CcA |Locus\_ID=BC332\_25948 |CDS\_len=1134 |strand=-  
ATGGTTAAAAGTGTAATGGAGAGCGGTGAATTAAGTTGTGGCCAAAGCGATGTGGTAATTAGTCACTTGATGAACGGGAG  
AGGAAAAATCTATCCAACGTTTCATAAAGAATGATAGACAGTGGAATTACATATGCTTTGCGTTGATTCTAATAACTCCA  
GACCTATATTGCGGGTTAAAGTTGTTAGAAGGTCCCTGAAAAAGCTTCCACATCAACCCTACCCCCACCCCCACCCCCG  
GTAGTGGATGATACGTCAATGGAATACGATTGCATGAGTGGTGTGATGAATGGAATAATAGTGAAGATTATGCAGAAAAGGA  
GTGTGGAGGAGCTGAGGACAGGCAGTTTCAACCACAAGGAAGCCACTCTTCTCGGATGGGACCAATCTTTTTGTAGGAC  
AAATATTCAAGGATAAGAATGTTTATGTAATTTTAAATATCATGAATACTGCTATTATTGCCAAGTCTCTGGAGTCAGG  
AAAGGTGCATGGACTGAGGAAGAAGATTTTCTATTGAGAAAATGTATTGAGAATTATGGAGAAGGAAAGTGGCATCTTGT  
TCCCATTAGAGCTGGTCTGAATAGATGCAGAAAGAGCTGTAGATTGAGATGGTCACTTATTGCTGGGAGATTGCCGGGAA  
GAACAGCAAACGATGTAAAAACTACTGGAACCTCACACCTACAAAAGAAGCTAATAACTGCTCCTCATCGACAAGAGAGA  
AAGTACAGTACTGCCCTCAAGATCACCAAAAAAACGTACTAAGACCTCGCCCTCGGACCTTCTCATCAAGTGCAAAGAA  
TAATATTTCTTGGTGCACCAACAAAAGTACTGTTATCACAACACACTAGACAAAGACGAACGCGACAAAGAAATAGGAC  
TAAATATTTGTCAGAAGCTCACAAGTGAAACGTGCTCGACTATAGATGATGGAGTTCATTGGTGGACAAGTTTACTGGAA  
AATTGCAAGGAAATTGAGGAAGATGTGGCTGCAGTTGGGATCTTTGAGGAAAAAATAAGTTGGTACCAAGTTTGTGCA

TGATGAGATTAATTCACCTAACCATGCAACAAGGACAAAGTGATGGTTGGGATGACTTTTCTGCTGATATTGACCTATGGA  
ATCTACTTAATTAG

>CcBLIND |Locus\_ID=BC332\_29076 |CDS\_len=948 |strand=+  
ATGGGAAGAGCACCATGTTGTGATAAAGCAAATGTAAAGAGAGGGCCATGGTCACCTGATGAAGATGCTAAACTCAAAGA  
TTTTATTACAAAATTTGGCACTGCTGGAAATTGGATTGCTCTTCCACAAAAAGCTGGACTAAGGAGATGTGGGAAGAGTT  
GTAGATTAAGATGGCTAAATTATTTAAGACCAAATATAAAGCATGGTGATTTTTCCGATGAAGAAGATAGAATTATTTGC  
ACCTTGTATGCCAACATTGGAAGCAGGTGGTCGATTATAGCAGCTCAGTTACCGGAAGAACCGACAATGATATCAAGAA  
TTATTGGAACACGAAGCTCAAGAAAAAGCTCATGGGATTAATAATACCTAACAAATAATAATAATAATAATTTTATTAATA  
TCCAAAAAAAATCACCCCATTTTCTATCTACTACTACTACTTCTTTTCATCAAGCCCAACAAAATCTTGGGCCTTTA  
ATTACAGGCCTAGAACAGCCCATTTATTTCTCAGCCCAACAAAATATTTTGCCTAATATGATGATTATGACAAATAATTA  
TAACTTTCTTAATTTTGGTGCAACAAATTATAATTTGCAAAATTACCCAAAATTTGAAGCAAATTTGTTTGCAAAATTATT  
CACAATTTGGAGAAGTTGCAAGTTGTTCTTCATCAGATGGAAGTCATTGTAGCCAAATGAGTTTTGGTAATAAAGAAATT  
AATAATAATATTAAGAGAAGAAATTATGAGATTTGGTCAAACATTTTTGAAGGAATTAATAATCAACAATTTAATCT  
TGATTATTATGGTACTATGGAGCAACTTGCTACAAATTGTTGTACTAATGGCAATAATGGTAGTACTAGTATTAGTAGCA  
ACAATTTGTTGTTGTACAATGATGAGAATTGTAACAAGTCAAATGAAATAGGGATGTTTTATTATTGA

>CcMYB1 |Locus\_ID=BC332\_04984 |CDS\_len=1023 |strand=-  
ATGGGCCATCACTGCTGCAGCAAACAGAAAGTTAAGAGAGGCCTTTGGTCTCCAGAAGAAGATGAAAACTCATTAAGCA  
CATCACCACCCATGGCCATTCTGTCTGGAGTTCTGTCCCTAAACTAGCTGGATTACAGAGGTGTGGAAAAAGTTGCAGGC  
TGAGGTGGATAAATTACTTAAGGCCAGATCTGAAAAGGGGTTGTTTTAGTGAACAGGAAGAAAGGATCATAATTGATGTA  
CACAGAATCTTGGGAAACAAATGGGCACAAATAGCCAAACATTTACCTGGCAGGACTGATAATGAAGTGAAGAATTTCTG  
GAATTCTTGCATAAAAAAGAAGCTTATTTCTCAAGGTTTTGATCCAAACACCCACAATCTCTCTCTCGCGCTGCTGCTG  
CTGCTACTCCTCCTCATCGAAACAACAAGAAAAAAACCAACAATAATCATACCACATCATCAGTTTTCACTATTGAAACG  
AGTTTATCTCCATCATCAACCAAAGAATTAGTTTTCAATGGACATGATCAAAGCAAGTCTTGACGATTGTACCTTTTTCC  
TCACACTAATAGTAGTACTACAGTATTAATATGCCTCAGTTCCAAACAAGTTGGAGTCATTATATGAATCTGCTTGCA  
ATTATTATAATCATGTTCCCATCAAGACGAATATTGTTTACCAAAACCACAGTACGTCAACAGGGACGTTTGGAATTATT  
AATGAGAATTGTATGTGGGGTGTACTGGATTGCAACCACATCATGAATTTGGTCCCTCCAACAATATTGGACATGAAGA  
AATGCAACAAGGAGCACAAGTTCAGCTTCAGGAAGAACATTGTCTGGAGGAAGTGTACAAGGTTAATGATCTTCATGAGT  
TCAACAAGCATGGACGAATCGCGGAGAATGTAACATTGATGACAGCTCTGACTTTGATTTTGAGTTTGTGGATTCTGAA  
TTGATACCTTGTGGAATTTACACTAACGTAAATTCATAGATCAACTTGCATGGGATTGTAA

>CcMYB100 |Locus\_ID=BC332\_00785 |CDS\_len=723 |strand=-  
TTAAAATGCTTATTTTGCAGGTGGTCTCTAATATCAGAACATTTACCAGGTAGAACAGACAATGAGATAAAAAATTATTG  
GAATTCTCATTGAGCAGGAAGTAGAAAGCTTAAGGATTCCAAGTGATGAAAAGCTGCCACAAGCTGTAGTAGAACTAG  
CCAAAAAAGGAAAACAAAAACAATTTATCAAACAAAGATGCAAAAGAAAAACCAATGCTAGCGTTTTGAATTCACAAGT  
GAACTGCAGTTCCTATTACGCCAAGGCTAAATATTGAGAAAGAAACCCCAACACTATAGGAAACGGCGATAATAATGC  
CATGGAATTAGATCGTAACGATCATCAGATGTTGTGGCATGACGATATTGTCCTAATGGACGATAAGGATGCAGAGATAG  
ACGAAGATTTCAATTTCAATTGTTTATGGAACGACGAAGGAGAAAATCTTGAATTAGTCGAGAAAAACAACAATAAT  
AATGAAATATTTGGTGAGGACAGCTATGGTACTCTTAATTGTTGGGATTGGGAATATTTAGGTGAAATATTGAATAATGA  
AACATTGGCAAGTACACAAGAAGCAGGGCAAGAGAATAACGGTATGTCAAGTGTTTCAATATTTGACATGAATGACAATA  
TGCCAAACTGCATGAATGAAGAAGCAACGGTTGAAAATATTGATCTCATGCAAAGTGATTTGGTAAATTGGCTTTTGTCA  
TAA

>CcMYB101 |Locus\_ID=BC332\_16135 |CDS\_len=846 |strand=-  
ATGGGACGTTACCTTGTTGTGAAAAAGCACATACAAATAAAGGAGCATGGACTAAAGAAGAAGACCAACGCCTCATCAG  
TTATATTCGTGCTCATGGTGAAGGTTGCTGGCGTTCTCTCCCTAAAGCTGCAGGATTGTCAAGATGTGGAAAGAGCTGCA  
GATTGAGATGGATAAATTATCTAAGGCCTGATCTCAAAGAGGGAATTTTACTGAAGAAGAAGATGAATTGATCATCAAA  
CTCCATAGTTTGTCTGGAAACAAATGGTCAGTTATAGCCGGAAGACTGCCGGAAGAAGTGAATGAAATCAAGAAGTAA  
CTGGAATACACACATTAAGCGAAAACCTCATCAGCCGCGGCATTGATCCTCAAACCTACCCGGTCACTCAACACTACCGCGA  
CTATCTCCACCACCCTGCCATTCCACCACCACAACAACCACCAAAAACATCAACATGGATTTGAAAACGTTGATCAA  
AAACCTAATATTATTATTGCCACGTCATCATACGATGAAACAAAATGCAGTAGTGGTACTACTGAGGAAACAAAGCC  
ACTAGACATTATACCAAAAATACCCTCATCACAAGTTATGATAAATCTTGAACATCAATAGGGTTACCATTCATGACTG  
ATCATATTTCTCAGCTGAATCAACTGCCTCATACAACCTCTTAGCCACCGTAGCACCGCCACCAACAGTGGCAGTGCCG  
GTAGTAGCCACCGCTCGGAGACGGTGGCAAAAACAGTTTGTATGTTGGCAAATTGGATATCAAGGGGGTACTCAGTA  
TTGTGGTAAATGCAAAAACACCCTGGATTTTACAGATATTACTGA

>CcMYB102 |Locus\_ID=BC332\_33436 |CDS\_len=810 |strand=-  
ATGGGAAGATCACCATGTTGTGAGAAAGCACACACAAATAAAGGAGCATGGACTAAAGAAGAAGATGAAAGGCTTATTGC  
TTATATTCGAACTCAGGTGAAGGTTGCTGGAGATCACTTCTAAAGCTGCTGGACTTCTTCGTTGCGGTAAGGTTGTC  
GTCTCAGGTGGATTAATTACCTCAGACCTGACCTTAAACGTGGTAACCTTACTGAAGAAGAAGATGAACTCATTATCAAA  
CTCCATAGCCTTCTTGTAACAAGTGGTCATTATAGCCGGAAGGTTACCGGAAGAAGACAGATAACGAGATAAAAAACTA

CTGGAATACGCATATAAGAAGGAAGCTTTTGTAGTCGGGGCATTGATCCAACAACACACAGGCCCATTAACGAGCCCAGCA  
CGACACAAAAGGTGACAACAATTTCAATTTGCAGGTGGAGATCATAAAACAAAAGATATTGAAGATCAAGATTATAAGATG  
ATTAATGTCAAAGCTGAATCTGGCTTAAGTCAAGTAGAAGATGAAATTAATAGCAGCCCATTTGAGAACAAATTTCCAGA  
TTTAAATCTTGAGCTCAGAATTAGCCCTCCTTCTCGACAAAATTACCAACAGAGCCATCATGTTCAAGATTTGAAACAAA  
GTCCCACAAGGTGTTTTGCATGCAGTTTGGGTATACAAAATAGTAAAGATTGCAATTGTAGTAAAAATAATAATAAT  
AATAATAATATGGGTAATATTGCAAGTTATAATTTTTTAGGATTAAGGGCTAATGGCGTTTTGGACTACAGAACTTTGGA  
GACTAAGTAA

>CcMYB103 |Locus\_ID=BC332\_02487 |CDS\_len=819 |strand=+  
ATGGGAAGAAAACCTTGTGTAGTAAAGAAGGTTTGAAGAAAGGTGCATGGACTGCAAAAAGAAGATATGCTTCTTACTGA  
ATACATTAAGGAACATGGTGAAGGTACAGGTGGAGAGCTCTTCTTAAGAAAGCTGGACTACTTAGATGTGGCAAGAGTT  
GTAGATTAAGATGGGTGAATTATCTTAAGCCGGGGCTCAAGAGAGGGACCTTTACACCTGAAGAAGACGATCTTATCGTC  
CGACTTTTATACTCTTTTTGGGTAGTCGATGGTCCCTCATTGCCGGAAGAATACCCGGTCAACAGACAATGACATCAAAAA  
TTATTGGAACACACATCTTTTGAAGAACTCAAAGCTCAAGGAAATGAGCCAAGAAGACACAAATCTATTAGAAAATCAA  
AGGAGAAAAGAAAAGCTTCTTCCAAAAAAAACAAACAAGGAATCAGAAAACAAAGGAGAGGAAAAAGAAGAGAAAAGATA  
GCTGAAAATGATAGCAATATTGAAGAGAGAGAACAGGTAGCTAAGAAGACAGAAGAGCAGCTACAGATGCAGGATTTTTTC  
GCAAGCGGTGTCAGAAAATAATTACAATTTTACTGGTTCCTCCTGCAGTCAAGATGGCACAAGTAGTGGTGCCTCTACTA  
GTGAAATAAATCTTGAAGAAAATAATTACAACAGTGAATTTATGAGAAATTTCAAGTGATAGATGAATTACTCCTCAAT  
GATCAATGGACTGAGTACAATAATGAAAGCCACATGATGTTGAAAGAGATTTATGAAGAGTATTTTCAACTTGTTTCAAA  
AAATTCATTGTCGTTTTAA

>CcMYB104 |Locus\_ID=BC332\_00057 |CDS\_len=783 |strand=-  
ATGGGAAGAGCCCCATGTTGTGCAAAAGAAGGATTACGTAAAGGGCCATGGTCTTCTCAAGAAGATTCATTACTCACTAA  
TTATATTAATCAACATGGTGAAGGCCATTGGAGATCTTTCCTTTAAATGCTGGGTTGCTTAGGTGTGGGAAAAGTTGCA  
GGCTAAGATGGGTGAATTATTTAAGACCGGGGATTAAGAGAGGAAATTTTTGTGAAGACGAAGATGATCTTATTGTGAGA  
TTACATTCATTTTTGGGTAATCGATGGTCACTAATAGCGGGGCGATTACCTGGTCAACAGATAATGAAATCAAGAATTA  
TTGGAACACGCATTTAGTCAAGAAGCTTAAAAATACCGGAATTGACCCAAACCCCTCAAGAATTTCCCTAGAAGGAAAA  
AAACTCAAAAGGAGGGGAAGAAATGCAAGAGTCAGAATTCTAAGGGTCAAAGTGTACAAGTCGAGAAGATTAAAGTATTT  
GCACCAAAGGCCATAAGGATTTCTTGTGTGAATTCAAGGGACAATAGTTTTGAAAATGATACGTTGAGTACAAGTACTTG  
TTCTTCAAATAGTAATTTTGAAGAAGTTGATGTTAGAAAAGAAAAGGAAAATGAGGTGAATTTTCTTGCAAGGGACTTAG  
ATTTTGGTGAATTACTTAAAGGGGATGAATTTTGTGATGAATTTCTAATGGGAGAAAGTTGCAATTTTTCAAATGCCCC  
TTTTCATTTGGATGATAATATGGTGGAGAAAGTGTATCAGGAATATCTTCTACTTCTTAGTTAG

>CcMYB105 |Locus\_ID=BC332\_20335 |CDS\_len=834 |strand=+  
ATGGGGAGAGCACCATGTTGTGCTAAAGAGGGACTTCGTAAAGGTCCATGGTCTACTAAAGAAGACTTATTGCTTACTAA  
TTATATTAAGGAAAATGGTGAAGGCCAATGGAGAACTTGCCTAACAAAGCTGGGTTACTTAGATGTGGAAAGAGTTGTA  
GACTAAGATGGATGAATTATTTAAGGCCAGGAATCAAGAGAGGAAATTTTAGCCAAGACGAAGATGATCTTATAATAAGG  
CTCCATTCGCTTTTGGGCAATCGTTGGTCACTCATATCTGGTCGATTACCAGGTCAAGTCAATGAAATCAAGAATTA  
CTGGAACACACATCTCATCAAAAAGCTCAAAATTGCTGGAATTCACCCCAAAGTCCACAAGATTTTCAACAAAAAGAGC  
CCAAGAAAAAGCCAAAAGTGATAAACCAAGAAAGAAACAAGACAAAAAAAAGAAAAATAACAAGAAAAAGACCAATCT  
TTAGTAAATAATAATAATAATGACACACCTCAAGTCGTATTTGTCCAAAACCAATTAGACTTATGAGGAATTACAG  
TGTTGAAATGTTGTCGCGCCCTTGTGAGATCTTCAAATTCACATGCATGCTTCGGCATTATTGAAGAGTCAGAATAACG  
CAGCTTCATCATCAGATAATTCTGAAGAATTAGCTGAAAATAACAAGAAGAATATTAATATTATTACTAAAGATGATGAG  
AATTTTTTATTGATGAATTTTGTGATTTTCAAATGAAAGCATGGTGGACAAGGTATATGAAGAGTATCTTCAACTTAT  
TTCTGAGAAATGTTATGATCCAATGTTAATGTAA

>CcMYB106 |Locus\_ID=BC332\_27082 |CDS\_len=522 |strand=+  
ATGAGAAAACCTGGTTGTGATTACAAAGAGGAAATGCATAAAGGATCTTGGTCTAAACAAGAAGATCAAAAACCTATTGA  
TTATATCACTAAACATGGTGAAGGTTGTTGGAGAGATTTACCTAAAGCTGCTGGTCTGCTTCGTTGCGGAAAAAGTTGTA  
GGCTAAGATGGATGAATTATCTTAACCCAAATTTAAAAAGAGGAAATTTTTCTGAGGATGAAGATGATCTCATCATCAAG  
CTTCATGCTCTTCTTGGCAATAGGTGGTCTTAATAGCTGGAAGATTGCCAGGAAGAAGTATAATGAAGTGAAGAATTA  
TTGGAATTTCCATTTGAGAAGAAAACCTATAAAAAATGGGAATCGATCCAAAAAATCATAATATTTCTCATTATCTTCGTA  
TAAAAAGACTTGAATATTTCCAAGAAAATAGCATAAAATCAGAAAATAATGCAGTAATATCTGATGCTACAAGTTCTAAT  
TGTGTTACAAGTTCATTGCCTGATCTTAATTCATTCCATAG

>CcMYB108 |Locus\_ID=BC332\_14002 |CDS\_len=954 |strand=+  
ATGGATCATCATCAGAAAATTGAAGTTGATTACAGGACGAGGAGGAGGACGAGGAGGAGATTATACGAAAAATAATCAAGA  
AATTAGGGAAGAAGATATTGTTATGGACCTTAGAAGGGGTCCATGGACTGTTGAAGAAGACTTTACACTTATCAATTTTA  
TTGCTCATCATGGTGAAGGTCGTTGGAATTCCTTGCACGTTGTGCTGGTTTGAAGAGAACAGGAAAAAGCTGCAGATTA  
AGATGGCTTAATTATCTTCGACCAGATGTTGACGTGGGAATATTACTCTTGAAGAACAACCTTTGATTCTTGAATTGCA  
TTCACGTTGGGGCAATCGTTGGTCTAAGATTGCTCAACATCTTCTGGAAGAACAGACAACGAGATAAAAAATTACTGGC  
GAACTCGAGTGCAAAAGCATGCAAAACAGCTCAAATGTGATGTGAACAGCAAGCAATTCAAAGATACCATGAAGTATCTT

TGGATGCCAAGGTTAGCCGAAAGAATTCAAGCCGCCGCCGCTTCTAACCCGGCGACAGCTTCTTCTCTGGCCCCCCCCAC  
CACCACCTTACATCCAAAACCAAGAAATTCACATTCCTACCAACATGAATCATCATATGTCAGACTATACACCTATCC  
CATTTATCGAGAAAACAAACAGTCTGAATTATTCAGCTACTTCAGCTTCGTCAGACAATTACTCGTCCGACCTCACCGAT  
GGTTGCTACAATTTCCCAATTAACCAAGCAATAATCAGGATTATTCTCAAGTTAATCAAAGTACTAATCAAATGTGCTA  
TGGAGAATCCACAATTAACCCAACAAGTTACGATTTTACCATGGATTTCAAGGATTCCAAGAAGTTGATCAACAAAACA  
ATACTCAATGGATGGACAATCCATGGAATATTGAAGATGTGTGTTTCTTACAACAATTGAACAATGACATGTAA

>CcMYB11 |Locus\_ID=BC332\_27759 |CDS\_len=1260 |strand=+  
ATGGGTGGTGCTTCTACTTCAATGGGGATGTTTTTGTCTGATATGAATTCACCTTCCATAAATACTCCCAAAAGTGTTGA  
CGAGGGTAAAGGGAGGAAGGTTCTTGGGATTTTCAATTCCTGAATAAAGGTGGGGCAGTTTTTCTTGTTGTCAGAATC  
TTGATGAAGTCCAAAATAGTGAAGAAAATATGAGAGTATTGATCTTAATGCTTCTTGCTACAATGAAGAGAAACAAATT  
ACACTGCATAGTACTTTTAATAGTAATAATAGCAGTAGTGGTGGTAATAATGGTAAGGAGACAGAGAGTGGTCAATC  
AAAGCTTTGTGCTAGAGGCCATTGGAGACCAGCTGAAGATGCACAACCTTAAGAAGCTTGTGCTATTTTATGGCCCTCAGA  
ATTGGAATCTTATAGCAGAAAAGTTAGAAGGAAGATCAGGAAAAAGTTGTAGATTGAGGTGGTTTAACCAGTTGGATCCA  
AGAATTAACAGGAGGGCATTAGTGAAGAGGAAGAGGAAAGATTAATGGCAGCTCATAGATTGTATGGTAACAAATGGGC  
AATGATAGCAAGGCTATTTCCAGGGAGAACAGATAATGCAGTGAAGAATCATTGGCATGTAATAATGGCTAGAAAATATA  
GAGAACAATCAAGTGCTTATAGGAGGAGGAAAATGGGACAATTTGTTTATAGAAGATCAACACTAGTAGTTGAAGAAGCA  
GATAGTGGCAAAGCACAAGCTCCAATTATCAGTTGCCAAAATTCTGTAAACCAATTTGGTGCCACTGCTAATACTAGTGT  
GAAAATAAATAATGATGGTCCAAATGAAGCAGCAGCAGCAACTCCTAGCAGCACCATAATGTCACTCTCCTTTCTCCTT  
ATTCACCATTTTGTGCTCCCCCTTTTGACTCATTACCTGCAGGTCAATTGTGGGAATGAGATGATGAATATTCTAAACCAG  
CAAGGGAACAAATCTTGGGATAGGAAAATGGAAATTACTCATCACAACACCACCATCCTACTCCACCATCTAATTCATT  
AATGATGATGAACAGTATGCAACAACAGTCACAATACTTACAGTTTCCCTATGTCAACAGTCAAGAACACAAATCTCAT  
CATCACCTCAGCAGCACAAGCAGAAGTACTAGTAAAAGAGGAGGACAGAAGAAGCAGCAGCAGCAACAACAACAAC  
AGTGATAATAGCACAATTGCACCACCATTATAGACTTTCTTGGAGTAGGTGCCACTTGA

>CcMYB110 |Locus\_ID=BC332\_18300 |CDS\_len=645 |strand=+  
ATGAAGGATAAAGAAGTTAAACAAGAATGAAGAGAGGATTTTGAAACCTGAGGAGGACTTGATATTGAAGAATTGTGT  
GGAGACTCATGGAGAGGGAACTGGGCTACCATTTCTGAGAAGTCGGGATTATTGAGGAGTGGTAAGAGCTGCAGACTAA  
GGTGGAATAATTACCTGAGGCCAAACATCAAGCGAGGAATGATGTCAGAAGATGAAAAAGACCTCATCATAAGACTCCAT  
AAGCTTCTTGGAACCGATGGTCGCTAATTGCTGGTAGGCTACCTGGAAGAACAGACAATGAAGTTAAGAAGTTCTGGAA  
CACACATTTGAACAACAAGAGATCCTGTAAAGGCAAAAAGAAGCATGTGAAGTCCAAGGAGGCAATACTCACAGCCCCAC  
AAGGCAAAACGCAACAGTGCCCTGCTGAGACAGTGAGAAACCAAGAAGTGGCCACCAAAACAGTTTTAGATTTCATGGATA  
GAAGAAATGCAGGACTTTAACTGCAGCTTACTATCACCTGTGATGAATAACATGCCATTTCTCGAAGACGAACCTTTTAT  
TCCCATATTGGACGACATAGTCTTGCTTGAAGCATTACAAGCACTGGTAAGAAGCATGGAGTGAGATTGAGACATTCC  
TTTAG

>CcMYB111 |Locus\_ID=BC332\_18314 |CDS\_len=834 |strand=-  
ATGAAGGTGACAGAGATGAGAATGTTGGGATGGATATGTGGACTTACTAAGAAAGATAGCGTTATAAATGAGACTATTCG  
AGACAAGGTGGGAGTAACCTCGGTGAAAGAAAAGATGCAGGAATTGAGATTAAGACGATTTGAACATGTGATGAAAAGGT  
TAACAGCAGAGAGGAAGAGTAAAGTGCAATGAAGGATAAAGAAGTTAAACAAGAATGAAGAGAGGATTTTGGAAACCT  
GAGGAGGACTTGATATTGAAGAATTGTGTGGAGACTCATGGAGAGGGAACTGGGCTACCATTTCTGAGAAGTCAGGATT  
ATTGAGGAGTGGTAAGAGCTGCAGACTAAGGTGGAATAATTACCTGAGGCCAAACATCAAGCGAGGAATGATGTCAGAAG  
ATGAAAAAGACCTCATCATCAGACTTCTAAGCTTCTTGGCAACCGATGGTCGCTAATTGCTGGTAGGCTACCTGGAAGA  
ACAGACAATGAAGTTAAGAATCTTGGAAACACATTTGTACAACAAGAGATCCTGTAAAGGCAAAAAGAAGCATGTGAA  
GTCCAAGGAGGCAAAATCTCACAGCCCACAAGGCCAAAACACAAGAGTGCCCTGCTGATACAGTAAGCAACCAAGAAGTGG  
CCACCAAAACAGTTTTAGATTTCATGGATAGAAGAAATGCAGGACTTTAACTGCAGCTTACTATCACCTGTGATGAATAGC  
ATGCCATTTCTCGAAGACGAGCCGTTTATTTCCATATTGGACGACATAGTCTTGCTTGAAGCATTACAAGCTCTGGCAA  
AGAAGCATGGAGTGAGATTCAACCATTCTTTAG

>CcMYB113 |Locus\_ID=BC332\_30875 |CDS\_len=1059 |strand=+  
ATGGGTAGAAAGCCTTGTTGTTCTAAAGAGGGATTAACAAAGGTGCGTGGACTCCGATCGAGGATAAAATTCTAATAGA  
TTACATCAAAGTTCATGGTGAAGGGAAATGGAGAAATCTTCCAATAGAGCTGGTCTTAAAGATGTGGAAAGAGTTGTA  
GACTAAGGTGGTTGAATTATCTAAGGCCAGATATCAAGAGGGGAAATATAAGTCCAGATGAAGAAGATCTCATAATCAGA  
CTTCACAAGCTTCTTGGAACAGATGGTCTCTTATTGCCGGAAGGCTACCAGGACGAACAGACAATGAAATCAAGAATA  
CTGGAACACCAACATTGGAAGAAAACCTCAAGAAGCAAAAGGTTCTGGTCAGCCAAATCGCGTAACGTCTTCATATCGTC  
AGCGCAATCGCTCTAGTCATGCCAAATCAGCCAACCCAAGCCCAATTACCCAACCTACAGCAAAATAATCAAGAACAACA  
GTTCAAGCAAGATTCAAATTGTCTACTACAAACAGACGTTGGACGTGAAGGATCATCGTCCTCCTCCTCCACCTGTTTGGT  
CGTCTGCAATAAGGCAATTTGGTGCATAAGATTTTTATCAGTCCACAAAATACTGATCAGTCAGTCAATGAGATTACTC  
AAATTGATAACAATGACAAGGCAATGACAGAGGAAAACGCGACAATAATATTGTAACATCCTCATCATCGTCATTGTCC  
GAGCAACAACAACAACCGGTATCAGAATCATATTCGCCAACAATTTGTCCGTAGAAATGGAGAATTATAACTTCAATTT  
CATGTTTGGTCTCGATGTTGATGATCCTTTCTTTCTGAACCTTCTAGTGACCTGATTTACGTGACCAAAATTTTGGAAA  
ATAGTACTATAAGTAGTACTGTTGATGCTGGTGTGATGAAGTTGGAGATTGTAATATCTCCGTCAAAAAGGAAAGGCAAGG

AGCTATTTTCTCCAAGTTCTAGTCAAATTTCAATTTTCTCAGAAGGGACGCAACACAACGATTTGGAACTTTGGATCGA  
TGGGTTCTCTTCTTGTTAA

>CcMYB115 |Locus\_ID=BC332\_34193 |CDS\_len=777 |strand=+  
ATGAATACTCCAATAATCTGTACAACTATCGTTGCAAGTAAGGAAAGGTGCATGGAATGAAGAAGAAGATTTTCTTTTGGAG  
AAAATGCATTGAAAAATATGGTGAAGGAAAGTGGCACCTTGTTCTGCTAGAGCTGGTCTAAATAGATGTCGGAAGAGCT  
GCAGACTTCGGTGGTTGAATTATCTGAGGCCACATATCAAGAGAGGTGACTTCGATCCAGATGAAGTGGATCTCATTTTG  
AGGCTTCATAAGCTCTTAGGAAACAGGCAATTTTATGTTTTAGATTACCTAAATTTGCGGGATCATCTCATTTGAAAGT  
TAATGATATTAGAGATCTAGAATGGTCACTTATTGCTGGTAGACTTCCGGGAAGGACAGCGAACGTTGTGAAGAATTTCT  
GGAATACTCGCCTTCTGAGGAAGGTAAATATTGCTCCGATTAACAATAAGATCGGAGACAATATTAATACTAAGAATGAG  
ATAATAAGACCTCAACCTCGGAACCTTCTCAAGTACCATGAAGAATGTTTCTTGGTGAACAACAAAAGTATCATAAATGA  
AGCAAATATACTGGAAAATTGCTATGAAATTGAAGAAGCAATAGCAACTGGAAGTGAACACCTTTATGCAAGAATATCA  
GCTCTGAGAAAAATTGCAATGAAATTGATAAAACACCATGTTTTTAAATGGTGGAGGCAACGCCATGCAACAAGGACAA  
AGTGATGGTGGTTGGGATGAATTTTCTATGGATGACATATGGAATCTACTTAATTAG

>CcMYB12 |Locus\_ID=BC332\_23833 |CDS\_len=1071 |strand=+  
ATGGAAAACGATACAGCGGAGGTTCAAGAAGTCACCGTCGCCGTTAACGGTTTTACGGCGGCGGCGATGATGAGGAAGT  
GTTGATTACAGAAGACGGAAGTGGAAAGAAAAACGCGGACCGCGTAAAGGGCCATGGTCACTGAGGAAGATGCGATAC  
TTAGTCGTTTTGGTGAGTAATTTGGGGCGAGGAATTGGAGTTTGATCGCACGAGGAATACCAGGTAGATCGGGGAAATCG  
TGTCGGTTAAGGTGGTGAATCAGCTTGATCCTGCTGTTAAACGCAAACCTTTACCGATGATGAAGATCGGATTATCCT  
TCAGGCCCATGCTATTCATGGGAACAAATGGGCATCAATTGCAAGGCTTTTGCCAGGTAGAACAGATAATGCCATTAAAA  
ATCATTGGAATTC AACCTTGAGGCGCCGTTGTGCCGAACCTTGGTAGGCTAAGAAGTGACTCCAGCAACGTCATGGAGGAT  
GTTAGTGTGAAAAATCAAAGCATCATCCGAGGAAACCAATCATGTGGAGATGTGAATTTTGAAGCTATTGAGGG  
AAAAGATGTTAGCTCTGAAGAAAACCAAGAAGATAATCTCTATGAGGATAAGAGTCAAGGAGATGTTCAACAGAGTGATG  
CAGCAAATGATCCTCATACGCTCTCCGTCCTGTGGCTCGTGTAAGTGCTTTTAGCGCATATGGTTCTTTGAATGTCCCA  
GAATCCCAACTGCAAACCTCAAGGCTAATTCCTGTCCAAGCGCTGATCTTGGGATAAGCAAATTGCTTGAAGGAGCTTT  
CACTGACAGATTAGTGCCTCACCAATGTGGACATGGCTGTTGTGGCAATGGCAATCAAGCAATTAACGGAAGTTCACTGT  
TGGGGCCTGAGTTTGTGACTATGATGAGCCTCCTTCCTTCTCAAGCCATGAGTTGGCCACATTAGCCACAGAGATAAGT  
AATGTTGCTTGGTGTAAGTGGGTTGAAAAACAGCAGCATTGAGGTTATCTTCAATCCAACAACAGGGCAGTGTTGTGG  
TGCCTCTCACTTGCCAAGCAGACCGTTCTAA

>CcMYB13 |Locus\_ID=BC332\_13912 |CDS\_len=1197 |strand=-  
ATGAACGAAAACGCTGAAAAGAGCAATTTCTCCGCTGTCGCTGTACCCGCCGCGTCGAAAATGTCTCATTCGAAGGCGG  
CGATGCGGTGTTACACGGCGGCGGAAGCGAAGGCAACGGTGGAAATGCCTCAGTCGACGGCAACGGAGGAGATGATTTG  
TTGACGACGGCGGTGATGTTGAGATGTCGGAGAGCGGAAGAGGTAACAGAGTGAGTAGTGAAGAGTGAAGGAGCCGTGG  
TCAAGGGAAGAAGACTTAGTATTGATGGAACCTCATATATAAGTTTGGTGAAGGAATTGGAGTATGATAGCACAAGGAAT  
TCCAGGTCGTTCTGGGAAATCGTGCCGACTTCGTTGGTGAATCAGCTTGATCCTCTGCTTAAACGCAAGCCTTTTACTG  
ATGAAGAAGACCGCATTATAATTAATGCGCATGCAGTCCATGGAAATAAATGGGCATCAATTGCAAATTTGCTCCCTGGT  
AGAACAGACAATGCAATTAAGAACCACTGGAACCTCTACCTAAGGCGCCGTTTGCAGAGGTATGGAGGGTTAAACCATT  
GTGCAGCGTGATGTTAGATGATAGCATTGATAACGCCAAGGTATTATTTGAAGAAATTAAGTCACATGGAGATTTTAACC  
AAATTAAGCCCCTGGAAATGCTGGAAGGTAGTCGCGCAGAATGCATGTCCAGCCAGTCTGAAGACAAAACCTCAAATATAT  
GAAATATATGATATTCCTGAGAAAAGTCCAACTTCGTCTCTGAAAGAAGTTGTTCTACGTCTGTGGAAAACAGTGATCC  
ATCTGCTTCTCGTCCAACCTGAGAAAATTGGCGGATTTTATGTTTGAACCTTCTGCAACTTCAAGAATAGTGCCTATGC  
AGGGACCCCTGATCCACACATTCTCACCAGACTTTGATATATGCAAACTTCTTGAAGGTTGTGATCTGCTGGTGAAACC  
ACAGTTCTCTCAGGGATCGGTCATGGTTGCTGTGCAGATTTCCACCAATAGCTCCTTCAAAGTTTCATTGTTGGGTCCCGA  
GTTTGTGTAATACGAGGAACATCCTCCCCACCTTGGCCATGAGTTAGCTTCTATAGCCACAGATTTGAACAACATTGCTT  
GGATCAGAAGTGGACTAGAAAAGCTGGTGAATTAAGAAATTCTCGACATAGTTCTACTCAAGTGGGTTTTGGATAA

>CcMYB14 |Locus\_ID=BC332\_31012 |CDS\_len=729 |strand=+  
ATGAAAACCGTGAAGGAATTGATTGCGGTCAAGGGTCCATGGAAAAAGAAGAGGACGAGCTATTGCAGAAGCTAGTTGA  
AGAACACGGTGCAAAGAACTGGTCGATTATTGGTAAATCGATTCCAGGACGATCAGGAAAATCGTGAGGCTCCGTTGGT  
GTAATCAACTTTCTCCTCAGGTGGAACATCGACCTTTTACACGTGATGAAGACGACAAAATTATCAAAGCCCGTGACAGAA  
TTCGGTAACAAATGGGCTACTATTGCCCGTTTGTAAACAGGTGCAACTGATACTCCATAAAAAATCACTGGAATTCTAC  
CCTTAAAGAAAAGTCTTGAACCTTCGAAAGATTTGGCGTTTGAAGAACTCTCAACCGCCATTGAAAGATCGTTGAGTA  
CCGGGTCTGGTACAAATTCGGGTACTCCATCTGGATCTGATTTGAGTTCGGGTTTTGCCGACCCGATATTTCAACGTCT  
CTGAGTCTCTTTTACCTGGGTTCCGGTCCAGCGAGGATTCAAATACTCCAATAATTGAGATTGCAACTTTGGTCCTTC  
TAGTATTGAGAAACAGTTATTTAGTCCTGAATTTTTGAGAGTTGTGCAAGATATGATACGAAAAGAAGTTGAAAGTTATA  
TGTCACAGTATGAGGAGGAAAGGGTGAATGTACACTGAAGCAGTAAAAATAATGCTATTAACAACATTGAGATTTGC  
AAAGATTGA

>CcMYB16 |Locus\_ID=BC332\_11900 |CDS\_len=981 |strand=-  
ATGGCGGCGAGGAAAGATTGCGATCGGATCAAAGGTCCATGGAGCCCCGAAGAAGATGAGCTGTTACAGTCGTTAGTGGA

AAAACACGGGCCGAGGAATTGGACTTTGATAAGCAAATCGGTTCCGGGTCGATCCGGAAAATCGTGCAGGCTCCGATGGT  
GTAACCAGCTTTACCACAAGTGGAGCACCGTGCGTTACACCTGAAGAAGATGAAACGATTATTCGGGCTCATGCGAAG  
TTTGGTAACAAATGGGCGACGATAGCCCGTTTGTTATCGGGTCGGACTGATAACGCGATTAAGAACCATTGGAATTCTAC  
TCTTAAACGTAAGTGTCTTCTATGTCTGAAGATTTAAGCTTTGATAATCCTCAACCACCTTTGAAAAGATCGGCTAGTG  
TTGGCCCGAGTATGATGAATCCGGGTAGTCCTTCTGGATCCGACTTGAGTGATTCCGGTCTTTCGGTTCGGGTTCCGGT  
CTGGATCTCCCTCTACCTCTTGTATCGTCCTGTTCCCGTACCGGCTGTATTTTCCCTCTCCCTCCTCCTGCTCC  
ATCTGTACCCGACCCGCCACTTCTCTATCCCTGTCTTACCCGGCTCAGTATCCGTACCCGGATCCGGATCCTTTGAAA  
AGCCAAGACAGTCCCCTCAAACACCACCCTACCACCACCGCAGCCTCCTCCTTTTGGCGGTTGAAAAGCCAATTCCA  
CCACCTGCACCGTACTTTCTTCTACCCCGCCTTTTATGGCCAGGTCCCTCAAACCCAGCAACAAAGTTACGAATTTTG  
TGCACCAAAATCAGGAGAAAAGCAGTTTTTTAGCCCAGAGTTTTTGTGAGTTCTGCAAGCTATGATAAGAAAGGAAGTGA  
AGAGTTACATGTCTGGGTTTGAAAAAATGGTTTCTGCCTGCAAACTGATGCAATAAGGAATGCAGTAATTAAGCGTATT  
GGAATCAGCAAAATTGAGTGA

>CcMYB17 |Locus\_ID=BC332\_01622 |CDS\_len=912 |strand=-

ATGAGTGAGATAAAGAAAGGGCCATGGAAGCAGAGGAAGATGAAGTATTGATTAAGCATGTGAAGAAGTATGGGCCAAG  
AGACTGGAGCTCCATTGATCCAAAGGCCTTTTACAACGTAAGTCTTGCAAGTCTTGTGCTCTTGGTGGGTCATAAACTCC  
GTCCCAACTTGAAAAATGGAGTGAAGTTTTTACGAGAGGAGGAAAGGACTGTGATTGAAGTTCAGGCACAATTTGGGAAC  
AAATGGGCTAGAATTGCTACATATATGCCTGGAAGAACTGACAATGATGTCAAGAATTTTGGAGTAGCCGGCAGAAGAG  
ATTGGCTAAGATTCTGCGGAACACCGCCACAGCCTAATAAACCAACAAAGTGTATCCACAGGGAAGCCCTCCTGCAA  
CTCAAAAAGTTCCCTCAGTAGAGGCACCAAAATTGAAGTATCAGCAGAGGAAAGGCCTTTGTCCATGTCCCAGGATTGC  
TCATCATCTATATGAATAACTTCGAGACAACCAGCATGGTCCCATTGCGTGAGTTAGTGAATTCAGTTCACCTTCTTT  
CGAGCAAGAACTGCTTCCACTTGAGTTTACTCCCAATGAGAAGAGAACCAGCATCTGGCCACAGTTTCCGCTGTCTTTCC  
CTCAGATTCCGCTCCAACTACCTTTGATCATCCACTAGGACATCAAGAATTACCCATGAAGCTCGAGGATACCAACTTC  
CTAGATTATTTTACATGGGAAATGTGCAAGTCCCTCTCGCACCATCGTGTTGAGGACAAGAGAGAACCTCTGAGATTGC  
TATGAAGAGAGAAATAATGGACTACCCCTTACCCAGATAGCTTCATCCATGACTTCCCATGGACATGTTTCGATTATA  
TTGATCCACTGCCAAGCCCATCCGAATGGTGA

>CcMYB19 |Locus\_ID=BC332\_15639 |CDS\_len=1518 |strand=+

ATGAGTATGACAAGTGAAGCGATGACAGGATGGCATCACAAGATGGGGTGGATTGCGCATCTGTGCAAGAAGCTTGTGG  
TGGAGGAATTACCGGAGGAGGTCTACCACTTAAAAAGGGGCCATGGACTTCTGCAGAAGATGCAATTTTAAATGGATTACG  
TCACGAAACACGGTGAGGGGAACTGGAATGCTGTCCAAAAGCACTCAGGACTTGCTCGGTGTGGTAAAAGTTGCCGTTTG  
CGGTGGGCCAATCACCTGAGACCAGATCTAAAGAAAGGTGCATTCACTCCCGAGGAAGAGCGGCGCATAATTGAAGTGA  
TGCTAAGATGGGAAACAAATGGGCACGAATGGCTGCTGAGTTGCCTGGGCGCACAGATAATGAGATAAAGAACTACTGGA  
ATACCAGGATAAAGAGACGTGACGCTGCAGGCTTGCCAATTTACCTCCAGATATTTCTTTTCAGGCGATCAGCGAAAAAC  
AAACAAAATGAGGAGTTGGGTGCGTTCTCCTCTACTGATTCACAGTATCCTGATTTCTTGCCAATGAACAATTTTGAGAT  
TCCAGCTGTGGAATTCAAAAGGTTGGAATTCATAAGCAGTTGTGTCCACCAGCACTTCTTGATATTTCCCAATGGTGGCA  
TACTTGATATTTCTGGAAGAAGCCTGTTGGCACAGGGTCTTAATTCTGCCTATTACAGTCGGTCATTCTCTCAACAATG  
CCTCCAGCCAAGCGTATACGAGGTGCAGAATCTCTGTTCTCTGGTTTAAATGGTGATTGCTCTCCATCAAAAAATGAAGG  
TTCTTTTCCAACCTGCCATCAATATCAGGAAGATGGTTCCTTGCTTGCTCAGTCGATGGGATTTTCATCTTCATTTAATC  
AAAATTTAACATCTGTTTCATCACCCTCATCCTCGGGTGAATTCCTGGCAGCCATGCCCTCTAAATGGCAAGACCTCT  
TCTTCAGAGCCCTTGTTGGGCAGAGAAGCTCGAGCTCCCTTCATTCCAAAGTCAGATGGCAAGTTGGGGCTTATCTTCTTC  
CCCCCTTCTTCACTTGAGTCTGTGACACTATGATTAGTCCCTCCAAGTGCAGTACTGAATCATGCAATTTGTGAC  
CTAGGAACAGCGGTTTGTGGACGCTGTACTTTGATGAATCTCAAAGTATGAGAGCTTCAAAGAGTATCTTGACCCAGGAG  
AATTCTGGTGATGTTGTTGATAATTCTGATCTTACGAGTATGATGGGAAACATACGGTGATCCCAATCTCTCC  
ATTAGTTCATTCTGTGTCATGATGTTTAGCGAATACACTCTACCAGTGGAAAGTCCCCAGAGGAGCCCAATTTGGTGA  
CAATGCCAGGTTGCAAGGTTAAGCAGGAGAAGTTTGATTTGCGACCCTATGATGGGAAGGAAGATGCATCAGACCTGATC  
TTTTCCCGGCCAGACTACTTGCTCGAATCCAATTGTTTTGGTCATATGCAAAAACCGCAAGATCGATCTGGCACTGA

>CcMYB20 |Locus\_ID=BC332\_01521 |CDS\_len=1530 |strand=-

ATGAGCATCACAAGTGAACCGATGATATGATGACATCCAAAGTTGACATGGATTGCGCAGATGAAGCTAGTGGTGGAGA  
AAGTGTACCACCTTAAAAAAGGTCCCTGGACTACTGTGGAAGATGCGATTTTAGTGGATTATGTCATGACAAATGGTGAAG  
GGAAGTGAATGCTGTCCAGAGGCATTGAGACTTGCTCGTTGTGGTAAAAGTTGCCGTTTGGGTTGGGCAAATCACCTG  
AGACCAGATTTAAAGAAAGGTGCATTCACTCCAGAGGAAGAGCGGCGGATACTTGAAGTACATGCTAAGATGGGAAACAA  
ATGGGCACGAATGGCTGCTGAGTTGCCTGGCCGCACAGATAATGAGATAAAGAATTACTGGAACACTAGAATAAAGAGAC  
GACAGCGTGCAGGATTGCCAGTTTACCCTCCAGATATTTCTTTCTAGCAAAATCAGAACAAACAAAATGAGGAGTTGGGT  
GCATTCTCCTCTGTAGATGCCCAAAATTCTAATGTCTTGGGAATTAACAATTTTGAATTTCTGCTGTGGAGTTCAAAAA  
TTTGCAGCTCAATCATCTGTTGTATCCGCCACCCTTGGTGAATTTCTGCTGTAAGTAGCTTTCTGGCCAGGGTCATA  
GAGCTCCCTATGGTAGTACGATTTTGTCTTCAACAATGCATCCCTCAAAGCGTATACGAGGATCAGAATCGATGTTCTCC  
GGTTCAAATGGTGATCTTCTCCTCAGCTCCTCACAATACCATAATGGCGGTTCTTTGCTTGCTCAACCTTTGGGTTTTTC  
TTCATATAATCATATTTAATATGATGATGACCGATCATTCTCAAGTGTAGTTTCATGGCGGCCATGCCTGTTTAAATG  
GCAACTCCTCTTCTTTCAGAGCCACATGGGCAATGAAGCTGGAGCTCCCTTCACTCCAAAATCAGACAGCAAACTGGGGC  
TCACCTCCTTCCCTCTTCTTCTTATTAGAGTCGGATGATATTCTGATTCAATCCCTCCAGCTGGAACAGTGAATCAGG

TAGTCTGTCACCTAGCAACAGCGGCCTACTGGATGCTGTGCTTTATGAATCCCAAATATGAAAGCTTCAAACGATAACT  
CACACCAAGGGAAGGAGACATCTGGTGATGCAGTCAATAAAGGATGGGAAAGTTATGGGGATCCAGTCTCTCCTTTACAT  
CATTTCTCTGCATCAGTTTTTGGTGAATACACCCCTGTCAATGGAAGTTCATTACATGAGTTCCCATCAGTGGCCACAAT  
GCCAGGATGCAAGATTAAGAAAGAGATTGGCGATCTAGCCCCCTGGATGAGAATGATGACTCTTTGAACCAGACAATCT  
TTTCCAGCCCCAAGACACAGCATGCTAAGAACAGTCTGGCATTGAAAGAAGTAATTAGTTCTGGCTTTTTCGATGATTGT  
GGCTGGGATTGCAAGCAAATCCGTGCAGTAGCAACATCATCAGGTCAAGCTTGTGGATGCAGTCTTGGGATGCCATGTC  
AGCTGTGTAG

>CcMYB21 |Locus\_ID=BC332\_31637 |CDS\_len=1461 |strand=+  
ATGGCTACAAATGATAGAGGAATGAAGAACAGCGGAGGAAAAACGGAGGAGGAAATAGACAGGTGGTAAAGAAAGGTCC  
ATGGACAACAACAGAGGACACAATTTTAATGGAGTATGTGAGGAAGCATGGAGAAGGGAATTGGAATGCAGTTCAGAGGA  
ATTTCTGGATTGATGAGATGTGGAAAAAGTTGTAGGTTAAGATGGGCTAATCATCTGAGACCTAATCTTAAGAAAGGTGCA  
TTTTCTCCTGAAGAAGAAAGAATAATTATTGAGCTTCATGCTAAAATTGGCAATAAATGGGCTCGCATGGCTGCTCAGTT  
ACCTGGACGAACAGATAATGAGATCAAGAATTACTGGAATACGAGGCTAAAGAGAAGACAAAGAGCTAATTTACCTATAT  
ACCTCAAGAATTACAATCACAAAACCAACCAGAGCATAACCAAGCCCAACAAAGCCTTATTTCTTCAGCATTTGATCCC  
CAAAGGACAACCTTATAACAATCCTCCCTCTCTTTCACTTTTGGGTATCTTAAATCCTTCAAGCATGAGACCTCCTATTAC  
TCATCAATTTCCCTAAATGGTAACAAAAATTTTCGCAATCCTCCTAAAGGCCTTTCCATGACACCTCCCTCATCTATGC  
AAAATTCACAATTTTCATCATTACCAGTATCTGTGTCTAACAACAATTTTGGTCACGACTTGTTCATTCAACGCCAATG  
CCATCATTTCAACAGACCTATCCAGATTTTAGCTCAACAATGAGGCCATTTTGGGGAATATTCCTTCAAACCAAATGG  
ATTAATGTTTGATATGGGTATTAATTCTATTAATTACCCCTCAGGGCAATTATCTATGCCTGTAACAACCTTCATCATCTT  
CTGAGAATACAAGCAGTGGTTTTGGTTCAAGCGATGCTAATAATTATACAAATGTTGGTGGATTATCACGAGGAAATAGT  
GGATTATTGGAAGATTTGTTGGAGGAGTCTCAGACTTTGACTCGAGCGATGAAAATTGAGGAAAGAGGAAAGTCATTATG  
GGAATATTATGGATTAGTGGAAAAAGAGTTAGGAGATCATCAAGATGGAGCCATTTTACTGAAGAATCAGTTTATAGCT  
TTGCTCATGGAGATGATGTCACCCTGTATAACAACCTCTGAAAGCTCCAGCTCAAATCCCAATGCATCGCCAGGGACAATT  
TTTAAAAAGGAAGGTTCACTAAAAGGAATAATCAAGTGGATGAAGATCTTATGTGTCTTCTTGATAGTTTTCTCTAGG  
TGTATCAGTTCAGATTGGAATGACCATAATTCAAAAATTGCTTCTGATGATTACAAAGCAGAAAATCTGACTGAAGATT  
CTATCAATTCGCAAGTAATAATAACAACAATTCAGGGTCAAAGAAACATGAATTGGGACTTGAAGGGTGTGTGGTAC  
AACATGCCTTCCTTTTGTAG

>CcMYB22 |Locus\_ID=BC332\_24264 |CDS\_len=1440 |strand=-  
ATGGCCCCAAACGGAGGAGGAGTGAACAAGAACAATAATGGGACATCAATAGGAAGAAATCACAATACAAGGCAAGTACT  
AAAAAAGGTCCATGGACAACAACAGAAGATGCAATATTAATGGAGTATGTGAAGAAGCATGGTGAAGGGAATTGGAATG  
CAGTACAAAGGAATTCAGGTTTAATGAGATGTGGTAAAAGTTGTAGGTTAAGATGGGCTAATCATTTGAGACCACATCTC  
AAAAAAGGTGCTTTTTCTATAGATGAAGAAAGACTTATTGTGGAACCTTCATGCTAAACTTGGAAACAAATGGGCTCGTAT  
GGCTGCTCAGTTGCCTGGTAGAACGGATAATGAAATCAAGAATTATTGGAACACGAGACTAAAGAGAAGACAAAGAGCTG  
GATTACCAATATACCCTCAAGACATACAACCACAAAATTACCAACAAGATCAAAACCAACAACATAGTACTAATATCCCT  
TCACCATTTGATAATAATCACCAAAATTCCAATTACAACAATAATAATCCCTCTTTCCCTTTTAGATATCTTCAATCC  
ATCAACTATGAAACCTAGTAGAAACATTATCCACATCAATATCAATTCAACAATAATAACCTACTTCTTCATTTCTCA  
CAAATACAAATAATATCAACAATCAAGTCAAGTTTTCCGAGACCCTCGCGTTAGCCTTTCTCTAACATTAGCATCATCG  
ATGAAGAATTCACAACCTTCCTTCAATGATAGCGCCCGTGCCTAATAATTTTAGTCAGGGCTATTCTAGCTCAATCCCGGC  
TCCACCCTTCAACATAACTATCCAAATTTCAACACAACATAAGACCTTTTCCCGGAATTTCTTCAAACCTAATGGTT  
TAATCTTAGGTATGGGCACAGAGCAACGTTCAATCCAATTGTCCATGCCTGAGACTACAACAACAACAACATCAAGTGAT  
CATGCTGATAATAATTACGTTGTTGAACGTGGATTATCGCGCGGTAATAGTGGATTATTGGAAGACTTATTAGAGGAATC  
TCAGACATTAACAAGAGGTGAAAAAATAGAGGAAATTTGAATGTTGATAATGAGGATAATAAAGGGAAATTAGTGTGGG  
AAGAATATGGATTAAACGAGAAGAAGCAGCAGATGCAATTTTAAGTGAAGAATCAACATATAATTTTGCTCATACTGATGAT  
AATAATGCTACACAAAGTAAACATTCTGAAGATTCAAGTTCTCTCAATTCATCCTCAGGGATAACAACAAGGAAGCTTC  
ATTAGAGTTGGGTAATCAAGTGGATGATGATATTATGAGATTTCTTGATAATTTTCCACTAGGTGTACCTGTTCTGATT  
GGTGTGATGATCAACAAAATACATCAAATGCCCAATCATTTGAATGTGACCAATTCATTGTCAAAATCAAGTTCATGA

>CcMYB23 |Locus\_ID=BC332\_06584 |CDS\_len=783 |strand=+  
ATGGTTTGTGAAATAATTAGTGAGCAATGGGGAGCAACTGGGGATTTATTGAAGAAGTATGGAGAAAAGGGCCATGGAC  
TGCTGATGAAGACAGATTGTTAATTGAATATGTCAAGTTGCATGGTGAAGGCAGGTGGAATTCTGTTGCTAGGCTTACAG  
GATTGAGAAGAAATGGAAAAAGTTGTAGACTAAGATGGGTAAATTTTGGAGCCAGACTTGAAGAGGGGGCAAATAACC  
CCAAATGAAGAGAAGATCATACTTGAGCTTCATGCTAGATGGGGCAATAGATGGTCAACTATTGCTCGAAGCTTGCCAGG  
GAGAACGGATAACGAGATCAAAAACCTACTGGAGGACGCATTTCAAGAAGAAGACCAAGAAGTCACTGTGACAACCTCTGAGA  
AGTCACGTGCAAGTCTTTGGAAAAGACAACAATTCCAACTGCAGCAGCAACAACAACAACAATCAAAAATCAAATCGAC  
ATCAAAAAGGTCATGTCATTACCAACTATGGCTCAAGCAAAAACAAGAAATGGCCATCTTGACCCAAACATCTACACAAT  
TGATCAACAAGATCAAGTTGGGTTGTTCTACTCGATGCTTAATAACTCGACCTCTATATCACAGTCTGAACCCCTCTTCGT  
CGAATGAAGATATCATGTGGGATGACTTATGGAACCTGGATGATTTTTATGGCCATTTTATCAACTCTACAACCTTATAAC  
AAAACCAACACTAGTCCTTGCTTCAACCTATGGCTAGTACTACTACTCCATCTTTCTATTAA

>CcMYB24 |Locus\_ID=BC332\_05804 |CDS\_len=774 |strand=-

ATGGTAGCTATGATGGGGTGGGGAGCTAATTCTGATCAACAAGGATGGAGGAAAGGGCCTTGGACTCCTGAAGAGGATAA  
GATGCTTTCTGAGTACGTTAAGTTGCATGGTGAGGGAAGATGGAGTTCTGTAGCTCGATGTGCAGGTTTGAACAGGACGG  
GGAAGAGTTGCAGGCTAAGGTGGGTGAACTACTTGAGGCCTGGACTTAAAAGAGGCCACATAACACCTCAAGAGGAAGGC  
ATTATTATTGAATTGCATGCCCTTATGGGGCAACAAATGGTCAACTATAGCCCCTTACTTGCCTGGAAGGACAGACAACGA  
GATAAAAAATTACTGGAGGACACATTTCAAGAAGAAGGAAAAAGCTTCAGGAAAGCAAGACAAGAGGAAAAATTATACGAC  
AGAAAAACCAACCACAACCAAACTGCACCATAGCCACGATTGATAAAAAGTTGTACCTCAAGCAGAAGAAGTAGTGATC  
ATGAAGAGTGATGACAGTAACGCGTATACTAATTATTACCATAAGAATATAATGGATCAGGATCCAGTTGTGGAGTTGCC  
ACCACTGACAACCTTGTTTCAGACACATCGTATGCATGGACGGATACTTTTCTGATGGATGGTTTATGGGGAGGATTATGGA  
ACTTAGATGATCATTCACTGATGCAGGCAACTAATGACAAGTGCAAGGTGGCAAATATCCAAAATCAACCAGCTAATTGC  
ACTTATGCAACTGATTATGCAGTTAACTTACATAATGGAGGTTTTATTTTCTAA

>CcMYB25 |Locus\_ID=BC332\_14907 |CDS\_len=717 |strand=-  
ATGGCACAAGAAGAAATGAGAAAAGGACCATGGACAGAACAAGAAGATCTTCAGCTAGCATTTTTATGTGAACTTATTTGG  
CGATCGACGATGGGATTTCTTGCCAAAGTTTCAGGTTTGAGAAGAACAGGAAAGAGTTGTAGATTACGTTGGGTGAATT  
ACTTGCATCCTGGTCTTAAACGAGGAAAGATGACTCCTCAAGAAGAACGCCTTATTCTTGAACTCCACTCCAAATGGGGA  
AATAGATGGTCAAAAATTGCCATGAAATTACCGGGCAGAAGTATAACGAAATCAAGAATTACTGGAGAAGTACATGAG  
GAAAAAGGCTCAAGATGAAAGGAAAAACAAGGCTTCTACTATTTCTCCATCTTCATCCTTCTCCAACCTCTTCATCTTTCT  
ATTCCAACAGTCTGATGTGACTTCACGCCATTATGGAACAATGAAAGGAAGTCTATGATACAGGCGGAGTTGAG  
AAAAAGATTAATGATGGTGGCAAAATGAAGGTGTACTCCATGGATGAAATATGGAAGATATTGAATTATCAGAAGAAAG  
TGAGACAATGAATAATATTAACCAATCATGTCATCACCTTTATGGAATTATTGCCCAATAACACACTATGGATGAGTG  
ATGAAGAAGAACTAAGATGTTTCCTCAGTTTTATAATTGCTTGACAACCAGGATAACACATTTTTTGTGGCTAA

>CcMYB26 |Locus\_ID=BC332\_14908 |CDS\_len=567 |strand=+  
ATGGCACAAGAAGAAATGAGAAAAGGGCCATGGGCGGAACAAGAAGATCTTCAGCTAGCATTTTTATGTGAACTTATTTGG  
CGATCGACGATGGGATTTCTTGCCAAAGTTTCAGGTTTGAGAAGAACAGGAAAGAGTTGTAGATTACGTTGGGTGAATT  
ACTTGCATCCTGGTCTTAAACGAGGAAAGATGACTCCTCAAGAAGAACGCCTTATTCTTGAACTCCACTCCAAATGGGGA  
AATAGATGGTCAAAAATTGCCATGAAATTACCGGGCAGAAGTATAACGAAATCAAGAATTACTGGAGAAGTACATGAG  
GAAAAAGGCTCAAGATGAAAGGAAAAACAAGGCTTCTACTATTTCTCCATCTTCATCCTTCTCCAACCTCTTCATCTTTCT  
ATTCCAACAGTCCCAGTGTGACTTCACGCCAGTACAGAAGATAATGAAAGGAACATATACGATACAGGTGGATTTCAA  
AAGAATGTTGCAGAAAACATGAAGGTGTACTCCATGGATGAAATATGGAAGACATTGAATTATCAGAGGAAAATGAAAC  
AATGTGT

>CcMYB27 |Locus\_ID=BC332\_17123 |CDS\_len=687 |strand=-  
ATGGACAGAACAAGAAGATCTTCAGCTAGTATTTTATGTGAAGATGTTTGGAGATCGTCGCTGGGATTTTTCTGGCGAAAG  
TTTCAGGTTTGAGGTTGGTTGGAGGGAGAGAAAAATAAAGTGGTTTGAAAAGAAGTGGAAAGAGTTGCAGATTACGAT  
GGGTTAATTACTTGAATCCTGGTCTCAAACGAGGCAAAATGACTCCTCATGAAGAACAAGTGTCTTCAACTCCACTCC  
AAATATGGAATAGATGGTCAAAAATTGCGGGGAAATTACCGGAAGAAGTATAATGAAATCAAGAATTACTGGAGAAC  
CCACATGAGGAAGCTAGCACAAGATGAAAAGAAGAACAATAAGGCTTCAATTTCTCCATCTTCATCCAACCTTCTCCAATT  
GTTTCATCTTCTCTGCCAACAGTCTGCTGTGGACTCCAGTACAGAACAAAACGAGTTGTTGCAAGTTGTTGAAGCAAAT  
AAAACATATGAAGAGGATCAGAACATGATGGTATACTCCATGGATGAAATTTGGAAGAAGTTGAATCATCACAAGAAAT  
TGAAACAAGGAATGATTTACCAGTTATGGCATCTAACACCTGGGATTATTGTCCAGATTGCTATGGATGACTCATGATC  
ATTATTACTATGACAATACTCAAGATTTCTCATTTTTTACTGGCTAA

>CcMYB28 |Locus\_ID=BC332\_22951 |CDS\_len=621 |strand=+  
ATGCAAGAAGAGAAATTACGAAAAGGCCCTTGCTCGACGAGGAAGACGAGCGACTAGCATTTGTTGTCTCCATTTTAGG  
TGAACGTCAATTGGGATGCGTTAGCAAAAGCTTCAGGACTCAGGAGAAGTGGAAAAAGTTGCAGATTGAGATGGATGAACT  
ACCTTAGACCTAATTTAAACATGGCCAAATTACTGAAGATGAAGAAAATTTAATTATTAACCTTCAAAAACAATTGGGA  
AACAAAGTGGTCAAAGATTGCTAAACAATTGCCAGGAAGAAGTATAATGAAATAAAGAATTACTGGAGAAGTCAATTTGAG  
AAAGAAAGCACTTATTTATGAACAAGAATGCTTTGGAAGCAATAATACAAGTGGTGATTACAAACCAAAATTATCATTTG  
CAAAAGATGATAATTGTCAGAGCTTTGATGATGGTGAAGAAGAATCCTCAAGATTATTGGATTGGATGATACCAAGTTGG  
ACATATGAACAAAGTCAAATGGAACATCACATGTACCTTTGTAATACTAAACCTATGTTCTTGTAATTATTCTTCTCA  
AGATGAAAATATTAGCAGTACATGGGATGATGCTTCATCATCTTCTATTTGGAATACTAG

>CcMYB29 |Locus\_ID=BC332\_26333 |CDS\_len=621 |strand=-  
CAGTTAACCATGCAAGAAGAGGAACCTCGAAGAGGGCAGTGGCTTGAAGAGGAAGATGAGAGACTGGCTATGATTGTAGC  
CATTTCAAGTGAACGTCGTTGGGATGCATTAGCAAAAGATTCAAGGTTGAAGAGGAGCGGGAAAAGCTGCAGATTGCGAT  
GGCTGAACTACCTCCACCCAAATCTAAAGCACGGTCATATTACTGCAGATGAAGAACGTTTGATAATCCGACTTCAGAAA  
CAGTTTGGAACAAGTGGTCAAAGATTGCAAAAACAATTGCCTGGAAGAAGTATAATGAAATCAAGAAGTACTGGAGAAG  
TCATTTGAGAAAGAAAGCACCTGTTTATGAACAAGAATGCTTTGAAGATAATACAAGTAATTCAGAACAAAAGTCATCAA  
TTTCGAAGTGCCTACTGTCTTAATTCATCCAACAGTGATGACTCTTTTTCTGAAAAGGTTGATTGTTACTCTGCTGAT  
TCTTTGGCAAATGAAGTAACATTATTGGATGGGATTCAGGTTGGTCATATGAACAAAGCAGAATGGAGCATCATATGTA  
CTTTTGCAGCTCAAACCTATGTTCTTGTTATGCGCCATGGACCTCTGAAGACAATAATTA

>CcMYB3 |Locus\_ID=BC332\_04434 |CDS\_len=1038 |strand=+  
ATGGATCGGGTTAAAGGTCCATGGAGCCCCGAAGAAAGATGAGCTATTACAACAGCTTGTTTCAGAAACACGGGCCGAGAAA  
TTGGTCTTTGATTAGCAAATCGATTCCGGGTCGATCCGGTAAATCTTGCCGGTTACGATGGTGAATCAGTTATCTCCCC  
AAGTTGAACATCGGGCTTTTACACCGGAAGAAGATGAGACTATTATTCGGGCTCATGCCCGATTTGGTAACAAATGGGCT  
ACCATAGCCCCGATTACTTAACGGGCGAACCGATAACGCAATAAAGAATCACTGGAATTCACGTTGAAGAGGAAGTGTTG  
TTCGTTGAGTGCTGATGAAGGTAAAGAACTTGCTGATCAGATTTTTGAAAATCATCAACCGCCGTTGAAGAGATCCGTTA  
GTGCTGGATCCGCTATGCCGGTTTCGGGTTTTCATTTAGTCCGGTAGTCCGTCGGGTTCCGATAGTGATTGAGTCTT  
CATGTTACTTCGTCGCTCAATCTCATGTGTTTAAGCCTGTTGCTAAAACTGGTGAATTTTTCCGCCGCCGTCGATTGA  
TATCTCATCTCCATCAATTGATCCTCCAACCTCTCTTAGCCTTTCCGTTCCCGGTGCTGACTTGGCTGAGTTATCATCTC  
GTTCCGGCCGATCGACTCAGTCGAAAAATCCGTTTTCACTGTGCTGCTGCCCTCCACCGGTGCAGGTTCCACCACCACCGCCG  
CCTCCACCTCCACCACCGCAGCCTCAGCCAGTGACGGCGGTGCCGTTTGAACAGCAAGACAAGGTATTTGTGCCTTTTAG  
CCAGGAGTTGTTGAGGGTGATGCAGGAGATGATAAAGACTGAAGTGAGGAACATCATGATGGGAATTGAACAGAAGCAGC  
AGCATCCGCAGCAGCAACATTATCAACAACAGCAGCAATTTAGCAGCAAACTCATCAATTGCCAAGTGGTTTAGGACTT  
GGCTTATGTATGCAACAAGCTTCTGATGGATACAGGGATAGGGCTGCTAATCGCATGGGAATAAGCAAATTTGATTAG

>CcMYB30 |Locus\_ID=BC332\_14493 |CDS\_len=696 |strand=+  
ATGGAAGCATCAATGGAGATGAAGAAAGGGCCATGGAGTTCAGATGAAGACTCTAAACTCATCCATTCCATCTCCTTACT  
TGGCCAAGGACGTTGGGATTCTCTCGCTCGCTTTGCTGGGTTGAAGCGTAGCGGTAAGAGTTGTCGATTGAGATGGTTGA  
ATTATTTGAGACCAAATTTACGACGGGGAATAAATACTCTCAAGAACAACCTCCTTATTATACTCCTTCACTTTGCTTT  
GGAATCGATGGTCAAAGATAGCGGAGAACTTGCCAGGAAGAAGTGATAACGATGTAAAGAATTACTGGAGAACCAAAGT  
GCAAAAACATGCGAAAGAGCTTCATTGCAACGTAAATAATAGCCACCAATTTGACACTTTCTTCTCTATCAATGGCTTC  
CATCTCTGCTGGCTCAACAAATATTGCCTACTACGCCACCTTCTTCTCCTAACAACACGATGACATGTCCAAATGCTGAT  
TTCATCTCATCACCAGAAGATGATAATACTAGATATAATATTTGGAACAACCTGTCTAGTTTTGAAGATGAAATTAATAT  
TTCTCATGATTATTCAATCCCTACTGATGATGAGTACTACTGTCACAATTATTGGCCAACACCATCACAAGTACTAT  
TACCAGATGAAATGCTATGTTTGGATGATGATATGGACCTCTGGCTCTTTCCTTAG

>CcMYB31 |Locus\_ID=BC332\_19185 |CDS\_len=597 |strand=-  
ATGGTGAGAACACCTTGCTACGACGAAAATGGAATGAAGAAGGGGACATGGACTCCTGAAGAAGATAGGAAGTTAACAGC  
ATATATTGCAAAATATGGCTCATGGAAGTGGCGCCAACCTCCCAAGTATGCTGGACTAGCAAGGTGTGGAAAGAGCTGCA  
GACTTCGATGGATGAATCACTTACGACCAAATGTTAAAAGAGGGAATTATACCAAAGAAGAAGATGAAATCATCTTGAAC  
CTCCATGCTCAACTTGGAATAGGTGGTCGGCGATTGCTGCTCACTTACCAGGAAGATCAGACAATGAGATAAAGAATCA  
TTGGCACACAAAACCTTAAGAAGCGCGTACTAATTATGCGACAACTCAAGTGATGAATCAAGCAAGAAATGTAAGAATA  
ATACTAAGAAGAGGTATACTGAAAGTAATACCAATAAAAATACAAGTCATAATAATATGCAGGAAAATATAGTACTGGAA  
AGTTCAGAAATGGTCACCAAAGGAATCATCAAGTGAAGAACTCTCCTCTTACAGTACCACTAATTATCAACAGCAACATAA  
AGTGTTCAGAGGAAATAACTAGTGAAGCTTTTG

>CcMYB32 |Locus\_ID=BC332\_03892 |CDS\_len=591 |strand=-  
ATGGATAAAAGACCATGCAACTCTCAAGATGCTGAAGTGAGGAAAGGACCTTGGACTATGGAAGAAGATTTGATTCTCAT  
TAACTACATTGCTAATCATGGTGAAGGTGTTTGAAGTCCCTAGCTAAATCTGCTGGTCTCAAACGTACCGGAAAAAGTT  
GTCGGCTCCGGTGGCTTAATTATCTCCGGCCTGATGTCCGGAGGGGCAATATTACACCTGAAGAGCAACTTTTGATTATG  
GAGCTGCATGCTAAGTGGGGAACAAGTGGTCGAAAATTGCGAAGCATTTACCTGGAAGAACAGATAACGAGATAAAGAA  
CTATTGGAGGACTAGGATTGAGAAGCATATTAAGCAACCAGAGAACGTGAATGGACAAGGAACCTTCAGAGCAAAATATTG  
ACCATCAAGAAGGAAGCAGTAGCCAAATGCTCTGCTGGTCAAGTAGATACCATAGAGACATACTCTCCAACCTTCATAC  
AATGGAAATATGGAACGCTAATTTTCAAGCCCCTAATTTTCTCACTGAAACAAATGACAATATGTGGAGCATGGAGGATAT  
CTGGTCTATGCAGCTGCTCCATGGAGATTAA

>CcMYB33 |Locus\_ID=BC332\_05936 |CDS\_len=510 |strand=-  
ATGGATAAAAGAACAATGCAATTCTCAAGATGTTGAAGTTAGGAAAGGTCCTTGGACTATGGAAGAAGATTTAATTCTCAT  
CAATTACATTGCTAATCATGGTGAAGGTGTTTGAAGTCCCTTGCTCGATCTGCTGGTCTGAAGCGTACCGGAAAAAGTT  
GTAGACTCCGGTGGCTTAATTATCTCCGGCCAGATGTCCGGAGGGGAAATATTACACCTGAAGAACAACCTCTTGATCATG  
GAACTACATGCCAAGTGGTCAAAAATTGCAAGCATTTGCCGGGAAGAACAGATAACGAGATAAAGAATTATTGGAGGAC  
GAGGATTCAGAAGCACATTAAGCAAGCAGAAAACATGAACAGATTATCATCAGATATTTCTGATCAGCACAATAATGACC  
AACAAAGCAAGCACAAGCCAAGCATCTATTGGTCTCCAGATACCATTGAAACCTACTCTGGAAATAATAATAACAACAAT  
AATATTATGGGCAGTAATTTCCATCATCAG

>CcMYB34 |Locus\_ID=BC332\_27190 |CDS\_len=864 |strand=+  
ATGAGTAGTAATAATAATAATAATTTATCATCAATGAAGATGAATTATTTGAATTAAGAAGAGGTCCATGGACACT  
TGAAGAAGATAATCTTCTTATTATTATTTCTACTCATGGTGAAGGTGTTTGAAGTCTTTAGCAAAATGTGCTGGAT  
TGAAGAGAACAGGAAAAAGTTGTAGACTAAGGTGGCTGAATTATTTAAACCAGATATTAACGTGGAAATCTCACCCCA  
CAAGAACAACCTTTGATTCTTGAACCTCACTCCAATGGGGTAATAGGTGGTGAAGATTGCTCAGCATTTGCCAGGAAG  
AACGGACAACGAAATAAAAACTATTGGAGAACAAGGTGCAAAAACAAGCAAGACAACCTCAAAGTTGATTCAAATAGCA

AGAAGTTTGTGGAAGCAATAAAGAATCTATGGGTACCAAGATTACTTGAAAAATGGAACAATGTTCTTCATCATCCACC  
ATTGACAAAAACAAAATATTAATAATCTTTCATTTCCAAATTTACCCTTAATCAACAATCAAGAATCATGTACAAAGGA  
CAACAAGTCATCACATGATGATGATAATACTAATACTAATAGTAATAACAACACAACATGGGGTTCACTAGGAAGTTCAA  
TGAATGAAAATTTCAATATTTGCAACAATTCAATGCATCAAGATGATGAGTGTACTATGTGGAGAATAATTTCAACCAG  
CAGCCACAACATTTTTTCATATCAAGAAATGTCAATATCAGAATGTGATGAGGTGGCAGAAGCTGATTGGTTTACTAATGA  
AGGATCATTGTGGAACATGGATGAGCTTTGGCAATTCAAAAAGCTAGGAGATGTAGATATTTGA

>CcMYB35 |Locus\_ID=BC332\_09701 |CDS\_len=882 |strand=-  
ATGGAAAGAGACATGTCCTTCTGTCTAAAACCTTCAAGTAGCAGCTCTAGTGATGATGATATTGAATTGAGGAGAGGTCC  
ATGGACTATTGAAGAAGACAATCTCCTTGTCCATTACATTACCAATCATGGGGAAGGCCGATGGAATATGCTAGCTAAAC  
ATGCTGGTCTGAAGAGAACAGGCAAGAGTTGCAGATTGAGATGGCTGAATTACCTTAAACCGGACGTTAAACGAGGAAAT  
CTCACTCCACAAGAACAGCTCATGATTCTTGAACCTTCATTCCAAGTTGGGCAACAGATGGTCAAAAATTTGCGCATTATCT  
ACCGGGGAGAACGGATAATGAGATCAAGAATTACTGGAGAACGAGAGTGCAGAAACAAGCGAGGAATCTGAAGATTGACG  
CGAATAGTGCAGCATTTCAAGAAATGATTCTGTTATTTGTGGATACCGCGGCTTCTTCAAAAGATACAGAGCTCCTCTTCT  
GTTATGCCATCAATTCAAAGTCCACAATCAACTCCACAAGATTTCAACATAGAGAAAAACAGCACCAACACCAGCAGCAG  
CAGCAGCTGTTCAAGTTCACATTCTGTCGAATATCTATAATTCTACCAACATTATGTCAGAATGTCCTAAAATTCACCAC  
GCGACATTGGCGATTCTGACTTAAATTCATTTGTCAAGGCTCATTTTCCAGTTGATGACAACAGTTATGATGTGGATAAT  
TATGGACAATTAGCAACTGGAAATTACTATAACGATGTGATGGATTATGACCAAATGAGTGGAGATCAAAACAAGCTGAC  
TGGTGATGTTTTATCTGACAGCTTTTGGAGCAATATGGATGAATTTTTCTACCAGAAACAGGATATGAGCCATTGTAGAT  
AG

>CcMYB36 |Locus\_ID=BC332\_31414 |CDS\_len=879 |strand=+  
ATGAATCATTACAGTCAATACGTCGACAACAATCAAAAAAGTGATGAAGAACTAATAATTTGGACCTTAAAAGAGGTTC  
ATGGACTATTGAAGAAGATTTCACTCTTATGAATCATATTGCTCTTCATGGTGAAGGTCGTTGGAATTCGCTCGCTCGTT  
CTGCAGTTTTAAAGAGGACTGGAAAAAGTTGTAGATTAAGATGGCTTAATTATCTTAGACCAGATGTTTCGACGTGGAAAT  
ATTACACTTGAAGAACAATTATTAATTTCTCAACTTCATTACGTTGGGGCAATAGGTGGTGCAGAAATTTGCGCAGCATTT  
GCCGGGAAGAACGGATAACGAGATCAAGAATTACTGGAGAACGAGAGTGCAAAAACATGCAAAGCAATTAATGTGATG  
TGAATAGCAAACAATTCAAAGATACATTGCATTATCTATGGATACCAAGATTAGTTGAGAGAATTAAGCTTCAACAAAT  
TCAAATAATAATCAAGTGAATAATATTCAACAAACAATTATGACAATATTATTAGTAACAATAACAATAATAATAATA  
TAATAATAATATTGTCCAAAACATTATGAATAATTTCAAACAAGAAAATTATTCTAGTACAACAACAACCTTCATCAGAAA  
ATTCATTTGGGAGTACACAAATTTAGACATGTCTGATAATTGTTACACTAATTACCCTCTTAATCAAGGTGATTATCAT  
GGGGAATATTAATTAATCCACAAGTGATTATTTTCAACATGGTATTATTGATGATAATAATCATCAACAAAACATGAG  
CCAGTTATTTTTTGTGATGATGTTTCAGACAAGTTTTGGAACCAAGAAGATATGTTGTTCTTACAACAACAACCTCAATTGA

>CcMYB37 |Locus\_ID=BC332\_31413 |CDS\_len=810 |strand=+  
ATGGATAAAATTCGCGAAAATAATATTGTTGAGCTTAAAAGAGGTCCATGGACAGTTGAAGAAGATTTTATTCTTGTGAA  
TTATATTGCTCATCATGGTGAAGGTCGTTGGAATACGCTCGCTCATTGCGCTGGTTTAAAGAGGACGGGGAAAAGTTGTC  
GATTAAGATGGCTGAATTATCTTAGACCTGATGTTAGACATGGAAATATTACACTTGAAGAACAATTATTGATTCTTCAA  
CTTCATTCACGTTGGGGTAATAGGTGGTCGAAAATTGCTCAGCATCTGCCAGGAAGAACGGATAACGAGATCAAGAATTA  
CTGGAGAACTCGAGTGCAGAAACATGCAAAAACCTAAAATGTGATGTGAATAGCAAACAATTTCAAGATACATTGCATT  
ATATTTGGATACCAAGACTAGTTGAGAGAATTCAGCATCCAAAGGTCAAATAATAATTCGATTAGAGTAGCTCAGCAA  
TCCGTTCTAAGAACAGGTATAACTGAGCTCGTGCCAATTCAGCTGGCGAACAACAGCAACAACAACGACAATAATAA  
TAGTAATTATTTAAGCGCGAGCGTTACACCGGAGAATTCAGCGTGGCAACTTCATCAGAAAACCTCAATTGGAACAACAC  
AAGTTTCACATAATCAAGATTATTATCAAGCTAATCAAGTGATTATCATCATCAATTATGGTTTGAAGATAATTATCAA  
GCAATGGATCAACAAAATAGTATACAATTATGGATGGATAATGAAGATGTTTTTGACAATTTGTGCAACATTGAAGACAT  
TTGTCCTAA

>CcMYB38 |Locus\_ID=BC332\_08081 |CDS\_len=840 |strand=-  
ATGGGGTGCAAGGCAGCAGAGAAGCCAAAGCAAAAACACAAGAAGGGATTATGGTCTCCTGATGAAGATGATAAGCTCAA  
AAATTACATCATTAACATGGTCATGGCTGCTGGAGCTCTGTTCCCATTAATGCAGGCTTGCAAAGGAATGGAAAGAGTT  
GCAGATTAAGGTGGATTAATTACTTAAGACCTGGCTTAAAGAGAGGGGCATTTAGTTTAGAAGAGGAAGACACAATCTTG  
ACCCTTCATGCCATGTTTGGCAACAAGTGGTCTCAGATTGCACAACACTTGCCAGGAAGGACGGATAACGAGATAAAGAA  
TCACTGGCACTCATATTTAAAGAAGAGAGTGACCAAAATGGCAGAAAATGAAGGCGACACTAAATCTGATAACACAGAAT  
CCTCACCTTCTTTAAAGAAATTGACTCCCCAGAATTCTAGTTTGGATTCAATTTGAACACAGAGAAGGATCATTAGCAGAT  
TCAGATCAATCTATTTATCCAAGAGAGTCTCAGAAAAGTAATTTACCCAAAGTATTATTCGCGGAATGGCTTTCTGTTGGA  
TCAATTTAATGGGCAAGAGTTCCACAACCTCAGGGAATTTTGAACCTTCACGAATAATTTTGGGTATAATAATTAGAGT  
TACATGACATATTATGCATAGTTTACCCATGAACAATGGTAGCTATGGGAATGGTGTAATCAAGAAGTTAACAATGGG  
ACAGTAGTAGATGATATTTTTCAAGCCCAACTCAAGTTTGGAGATCCCATGTCTGCTAACGGATTTGAGGAATTCATGTC  
AGGGGAATTCACATTAACGACGATGTCATGTACATATGA

>CcMYB39 |Locus\_ID=BC332\_02119 |CDS\_len=843 |strand=-  
ATGGGATGCAAGCAAATGGACAAGCCAAAGCAAAAGCATAAGAGAGGATTATGGTCTCCATATGAAGACCATAAGCTTAA

AGACTACATCCTCAAGCATGGCCATGGCTGCTGGGCATCCGTGCCTATTAATTCTGGATTGCAAAGGACTGGAAAAAGTT  
GCAGATTGAGGTGGATTAATTATTTAAGGCCAGGTCTAAAGAGAGGAACATTTAGCACTGAAGAAGAGGAGACAATTCTG  
ACCCTTCATGGCATGTTAGGAAACAAGTGGTCTCAAATAGCACAAACATTTACCTGGAAGAACTGATAATGAGATAAAGAA  
CCATTGGCACTCTTATCTAAAGAAGAGTGTGTCCAAAATGGCTAAAACATATAGTGAAGAAATGCAGAAGCTTCATCTTCTT  
CCATGAAATTGGTTTCCAAAAAATCAAGTAATCTGGGCTCCTTTGAACTCGTAGAAGGTGCACTATTAGCCGATATAGAT  
CAATCCACTTTACATGTTCAACTTCCACAAGAAAATCGCGAATGTAATTTACCCAAAGTGTTATTTTCGGAGTGTTCTC  
ATTAGATCAGTTTAAATGTTTCAAGATTTTAAAGAACTATCAAGCAACATCATTCTAAAAACAACATGATGCAACGATT  
CAGTGTTCGAATTAGATGCTTTTGTCAATATGGTCCACTACTAGCGATGAATGAAGCTATTACCTATGGGAATGACATA  
AATGGCGGTTTTAACAATATGTTTCAACCACCTCTCAAGTTTGACGATCAAATCTTTGTCAATGGTTTTGAGGAATTTAT  
ATCCGGGGAATTTAACGTGAACGGCGGTGTGATGTACATATGA

>CcMYB40 |Locus\_ID=BC332\_02384 |CDS\_len=1101 |strand=+  
ATGAGGAAGCCGGAACATAATAGTAGTAATCCATCCCATCGACAATGATGAAGGAGAAGGAGAAGGAGAAAAGGGAATAA  
GGCAAAGTTAAGAAAAGGGTTATGGTCACCAGAGGAAGATGAGAAGTTGATGAATTACATGTTAACAAATGGGCAAGGAT  
GTTGGAGTGACATTGCTAGAAATGCTGGCTTGCAAAGGTGTGGCAAGAGTTGTCGTCTTCGATGGATTAATTACTTGAGG  
CCAGACCTTAAACGAGGTGCTTTTTCTCCACAAGAGGAAGAAGTCAATTGTTTATTGCTTCTATTCTTGGAATAGGTG  
GTCACAAATTGCGGCTCGTCTCCCGGGAAGAACAGATAACGAAATCAAGAATTTTGAATTCCACAATAAAAAAGAGGC  
TGAAAAACAACAACAACAACAATCACAGTAACAACAGCACGCCATCACCTAACGCCAGTGATTCTTCCTCAGATCCT  
AGGGCTCTCGTGGGAGGAATATTCCTATGCAAGGGCACGATGTAAATGTCATGGCAGCCTTCTGCATGGATAATTCATC  
GTCTACTACCTCAGGGTCATCCATGCAAGCCATGGTTCTAGCAACCATTTTAAACCCTTTCCTCAGCTTGACAATACAA  
GCTACGATATCTCAGGATTAGTCGGGCCAGTAAATTTAGGTCAATTTGGTTGTAACGGTTGTGATGGTGGATTTTGGAT  
TATGGAGTTGAGGAGACTTATAGTATGATGGGGTTAGAAAGTGATGAATTTTCACTACCCCACTAGGGGGTGTTCATAA  
GAGTACTATGGGGGAGAATAATAACAATAATAGTCATGTCAATTTTGTAGTAACATTGTGATTGGAGCCAATGACTATA  
TGGTTGAGAAGAAAATTACAAATGGTAACAACAACAACAACCAGCACTTGATGAATATGAGTGGGAGTAGTGATCAAAGC  
CTAAAGTTGAGGACTATATGTTGGTTTGGGAATCATAATCATTGGCATGGGGAAAGCTTAAGAATTGGAGAATTTGA  
TTGGGAAGTTTGTGGCAAATGTTTCTCTTTACCTTACCTTGATTTTCAAGTTGAATAA

>CcMYB41 |Locus\_ID=BC332\_28534 |CDS\_len=1074 |strand=-  
ATGAGGAAGCCTGAGTTCTCCTCCTCATCCTCCTCCGGCAAGAACAATAACAACAACACGAATAATAATACAAACGTGAA  
ACTAAGAAAAGGGTTGTGGTCGCCAGAGGAAGATGAGAAGCTCATGCATTATATGCTGACAAATGGACAAGGGTGTGGGA  
GTGATGTAGCACGGAATGCTGGATTACAAAGATGTGGGAAGAGTTGCAGGCTCAGATGGATTAATTATTTGAGGCCAGAT  
CTTAAGAGAGGTGCATTTTTACCTCAAGAAGAAGAGCATATAATCCATTTACATTCCCTTCTTGGAACAGGTGGTCTCA  
AATAGCTGCACGTTTGCCTGGACGTACTGATAATGAAATCAAGAATTTCTGGAATTCACCTTGAAAAAGAGGCTAAAGA  
ATTCATCGTCATCCTCTACACCATCACCAAATGCAAGTGATTATCCTCAGATCATCTCTCCAAAGACCTCAACATAGGA  
GTTACTCAACAAAGATTATGACAATGCAAAAACATAACCTAATGTCCATCAACATGGACTCAACTTCATCTTCTCCTC  
GTCTATGGCCCTAAACACGATTAATATTGATCCTTTACCCACATTAGACCATACCTTAATTAACATGTCTAATGGATTTA  
ACATCTCGCCCTCATACTTGAGTACTACGCAACCATGCATGGTACAAGGAGGGAATATTGTGGGTACTAATAATGGTGGA  
AGTCTATTTTATGGGAATAATCATGGGATATTTGGAGGAAATCTTAGTATGGAAGGCCATGAGCTCTATGTTCCACCATT  
GGAGAATGTAAGTATTGACTATAATCAAAATGTTGAAAATGGGAATTATGTTGAAAGGAGCAATCATCATCAAAACAACA  
ATTACGTTAATAATATGAGCAGCTTGAATAGTACTAGTCATAATTTCAATAGTAGTAGTAATATCAAAGTAGAAAATTTT  
GGAGGGATTGGGAATTATTGGGAAGGAGATGAACATAAGGTGGGAGAGTGGGACTTGGAGGAATTGATGAAGGATGTTTC  
ACCTTTCCTTTTCTTGATTTTCAAGTTGAATAA

>CcMYB42 |Locus\_ID=BC332\_25321 |CDS\_len=996 |strand=-  
ATGGGCCATCACTGCTGCAGCAAAACAAAAGTTAAAAGAGGTCTTTGGTCTCCAGAAGAAGATGAAAAACTCATTAGACA  
TATCACCACCCATGGTCATGGCTGCTGGAGTTCTGTTCCAAAACCTAGCAGGACTGCAAAGATGTGGAAAGAGTTGTAGAT  
TGAGATGGATAAATTACTTGAGGCCAGACTTAAGAAGGGGTTCAATTTACTGAACAAGAAGAAAGAAACAATTATTGATGTT  
CATAGAATCTTGGGAAATAGATGGGCACAAATAGCGAAACATTTACCAGGTAGGACAGACAATGAAGTGAAGAATTTTGT  
GAATTCCTTGATCAAGAAGAACTTATTGCTCAAGGGTTAGATCCAAATACCCACAACCTCCTCAAGAACAATCTAACA  
ATCCAACCAAAAAATCCGACTACACTTATCATCATCAAGATTCCACCTCAGTTTTACCATTGATACTTCAACAAATAAA  
GAAGTAATTTCAATGGATTTAAATCAACTCTTGCAACCTTATCTCCTAATTTCCCTCCTAGTGATAATATTACTTC  
TAGTACATAACAATTACACTCCTATTGTTCTAACATTGAATACCAAAACCCTACTTTCGCATGGAATTCATTTTGGATT  
TCGCAAGTAATTTGTTCTTTAATGGAAAGCACGACGAATATTAATCTGTCTATATATAAATGAGAATAAAATGTGGAAT  
GGAACCTGGACTTGAACCAACAACATTAATCCTGTCAATGGACAAGAAGAAGAAATGCAAGTACAATTACAAGGGGATCA  
ACAATTTCCAATTATTCAGACCAAGTTTTGTCTGATCTAGAAGATGTGTACAAGGTTAATGATCATGATCAAACAGTGG  
AAAATACATTTGACGACAACCTAACTTTGATTTTGAAGTTTATGAATTCGCATTTGTGCCTTGTGGATTGTACACTAAT  
GATAATTCTATGGATCAACTTTTATGGGATTGTTAG

>CcMYB43 |Locus\_ID=BC332\_09604 |CDS\_len=1146 |strand=+  
ATGGGGCATCATACATGTTGTAGCAAACAAAAGTAAAGAGAGGGTTATGGTCTCCTGAAGAAGATGAAAAACTCATCAA  
GTACATTACTACTTATGGTCATGGTTGTTGGAGCTCTGTCCCTAAGCTTGCAAGGACTTCAGAGATGTGGAAAAAGCTGCA  
GATTGAGGTGGATAAATTATCTGAGACCAGATTTGAAACGTGGGAGTTTCTCACCTCAAGAAGCAGCACTTATCATTGAG

CTCCATAGCATTCTTGGCAACAGGTGGGCACAAATAGCAAAGCATTTACCTGGAAGAACAGATAACGAAGTGAAGAATTT  
TTGGAATTCGAGCATCAAGAAGAAGCTCCAGCTTTCACATGGAACATTCTCTGATCTCTCCATCATCTTTCCTAATAATA  
ATAATCTCATTGCTAATCCAAACCCTAATCCCTCTTTTGATAATTCCAACCTATTCAATAACCCCAATGTTCTTACT  
AATAGTTTCATGTCAAGTACAAATAACTCATCTCCCCTAATTCAACAACCTTGACCAATGATTAATTTTCTAATGGGGA  
TTTAAATTTAATCAATCAAGTTGTGCCCTATTCCTTCTCTATGTCAATTTGACTCAATGTCAAATGATCCAACATGGTTTA  
ATTTCAATTATCCTCATCATCTTCAACATGATCTTGAATATAACCCTAGTGTTATTAACAAGACAATTCCAATTCCATG  
TTCACCTCCAACATTTCTTTGAATTGTACTAATGGGGAGAAGCTTTCATGGATTCAACAAACGCGGATATCAAATTCATCA  
AGATTTAATGATGGCGCCTTTGCTGTTGCCAAGCTTCTGAAACGATAAAGGGGAATGAAGGTGGCATTCTAGAATCAA  
CTCCTGTTGCGTCACAATACATTCACTCAATGGCGATCAGCAGTCTCCCATGTACCATCCGACTGGTTATACTATGAAT  
CCACATAACAATAATAATGTGCACCGAGTCGTCCATGAAATGAAGCAGATAGAATCCGTACACATGTATCATCACCATC  
TTCATCTAAATCTTCAGCATCAGGTTTCATCATCTTGTGAGCACTTTTCATGCAGTCAATTTATGATGAACCCTAGTGGCA  
ACCTCCCTACAACCTGGGATTCATAG

>CcMYB44 |Locus\_ID=BC332\_00146 |CDS\_len=1017 |strand=-  
ATGGGGCACCATTTCATGCTGTAATCAACAAAAGGTAAAGAGAGGACTTTGGTCCCAGAAGAAGATGAAAAGCTTATCAG  
ATATATTTCTTCTCATGGTTATGGCTGCTGGAGTGAAGTCCCTGAGAAAGCTGGGCTACAAAGATGTGGAAAAAGTTGTC  
GTTTGAGATGGATCAATTATTTGAGGCCTGATATTAGAAGAGGAAGATTTACCCCTGAAGAAGAAAAATTGATTATCAGT  
CTCCATGGTGTGTTGGCAACAGATGGGCACATATCGCAAGTCATTTACCCGGAAGAACAGATAACGAGATAAAAAATTA  
CTGGAACCTCTGGATTAAGAAAGCTGAAAAGCCTTCAAAGCCATCAGCAAACACAACCTTCTATTACTGATCATCATC  
ACCAGCAGTCACATCAAAGATCTCAATTGGTTAATTACAACACAATTACAAGCCAACAAGACATATTTTCACTCAAGAT  
CTTGGAAACAAAATCTCAAGTACTCCTCAAGATTCTACCCTATTCAATTCTCCAAGCCAATTGTTCTTTTTCGACAGTGG  
TTCCTCGACTCTATGACAAATGCTATTATTAATGATGCCACAAATCGAAGTACTACTATAATAATGCCTCATTGTTTC  
AAGAAACATCTACATTGAACTCAGAGTTCGCTGGCAAGTCGATCAACAACAACAACAACACTTCAAGTACAGACATCT  
TCGTACGCGATAGGGATGGATTGCAATTATTTGCCACCATTGATAGAGAGTATGGTACCACCTATGGAAATACCTCGTAA  
TAATAACAACAACAATATTATGGTGAAGGGCAAGAAAATAATAATCAATTGGATGAATGGAGTAGTCAAGTGGACA  
CACAAACATGTTGTCCAAGTTATCTATTTTGGGATCAAGAAAATGGATCAATTGGTGGTGATCATGAGATTAATATAGAT  
CCAACATACATCAAACAATATGGGACAAATATTATCTTCTTTCTTCTTTCTTTATGA

>CcMYB45 |Locus\_ID=BC332\_08924 |CDS\_len=999 |strand=-  
ATGGGGCGCCATTCTTGTGGTGTGAAGCAGAAGCTAAGAAAAGGATTGTGGTCACCTGAAGAAGATGAAAAGTTAAGCAA  
TTATATCACCAATTTTGGTATTGGCTCCTGGAGTTCAGTCCCTAAGCAAGCTGGCCTGCAAAGATGTGGAAAGAGTTGCA  
GATTGAGATGGATAAATTACTTGAGGCCTGATCTTAAAAGAGGAATGTTCTCACAAGATGAAGAGGATAGGATACTTGGT  
CTCCATCAAGTTCTTGAAACAGGTGGGCACAAATTGCTGCACAACCTACCAGGGAGAACGGATAATGAGATAAAGAATTA  
CTGGAATTCGAGTTTGAAGAAGAAGCTAATGAAGCAGGGGATTGATCCAAACACCCACAAGCCATTAAGGGAGAATCAAG  
TAATCAAAGATGAAGAGAATTGTACTAATAAGACCTCAATGTTTGAGGTACCATTCTTAATGAAATGGACCAACCATT  
ACACAATTAGCTTCTTCAAAGACCAATATGTGAGTAAACAAGTCTTTGATCTTCTATTTGCTCATGAATCCAATCCAA  
TGAGAATAATTACAGACGTTAGCTCAGTACCATGATCATCATCATCAGAGCGAATACGAGGAAAATCCAAATTATGTGT  
TTTGTTTCAGCATCAAGTGATCAAAATTAGAACATGGACAGATGACAGATACTGATTTTGCTAGCAGCTCAACTTCAAGA  
ATGAGTTCAAGCAACAGTTCAAATATGTGTAGCAATCAAACACTGCTAGAATTCGGACGGAGAACAGTGAAGCCTTGTC  
ATGGGATGTTGAGAACAGATGGAATCTCTGTTCCAGTATCCCTACATAGGAATCAAGAATGAAGAATTAAGGTCAAGTC  
CAAGCCAAGAAAGAGAGCTATATGGTCACAGTTCGGAGATTTTCATGAGTAATTATCCATTAAGTTCCTTAACAGAAGAA  
TTAAGTGGGGCTAATCTAGATGTCTTCAAGCAAATTTAA

>CcMYB46 |Locus\_ID=BC332\_16679 |CDS\_len=963 |strand=-  
ATGGGGCGCCACTCTGTTTATGTTAAAGAGAAGCTAAGGAGAGGATTGTGGTCACCAGATGAAGATGAAAAATTGTATAA  
CTATATCACTAGATTTGGTGTGGCTGCTGGAGTTCAGTCCCTAAGCTATCTGGTTTACAAAGATGTGGAAAGAGCTGCA  
GATTGAGATGGATAAATTACTTGAGGCCTGATCTTAAAAGAGGAACATTTTCACTAGAAGAAGAGGATATGATTATTACT  
CTCCATGAAGTTCTTGAAACAGATGGGCACAAATTGCAGCAAAATTACCGGGGAGAACAGATAACGAGATAAAGAATTA  
TTGGAATTCATATTTGAAGAAGAAGCTAATAAAGCAAGGGATTGATCCAAATACACACAAGCCACTAAGTGAAAATCATC  
AAGTAAGAAATGACACAAATTGTACAGACAAGGCCTCAATGTTGCTGATGTCCACATTTCCCAATATGTCAAATTCAGTT  
GAAATAGAGCAACCATTTCACTTTAACAAGAAATTTTCAACAGTGAAGCAATTACTAGACAGTTAACAGAAGTTTCAAG  
AAACCAACTTGTGAGTAAACAAGTCTTTGATCCTCTATTTCTGTATGATTTCCAAGCAAATATGAATCCAATTGGACCTT  
ATGATGGGAATCAAGATTTTGGGATTTGTTCAATGCCAAATTTAACAATTTTGAACATGGACACATGACAGAAAGTGAT  
TTTTCTGACAGCTCAACTTCAAGAATGAGTACAAGCAACAGGACAAATACTATGATTAGACATCATAGCTCTGCTGGAAT  
TCATCAGATGAATGAAATGTTGGAAAATTTCTCAAGAATTGACATGGGATGCCGACAACAAAATTTGATTCTCTGTTTGAGT  
ATCCTTACGATGGGATCAAGAATGAAGAAGATTTTCAGTAATAATAATAATAATAATAATAATCCATTGAGCTCTTTACTC  
TGA

>CcMYB47 |Locus\_ID=BC332\_22066 |CDS\_len=1263 |strand=-  
ATGGGGAGGCATTCTTGTGCTACAAACAGAAGTTAAGGAAAGGCCTTTGGTCCCTGAAGAAGATGAGAAACTTATAAA  
ACATATTACTAAATTTGGTCACGGCTGTTGGAGCTCTGTCCCTAACTAGCAGGTCTTCAGAGGTGTGGAAAAAGTTGTC  
GGCTGAGGTGGATTAACACTTTCGACCTGATTTGAAAAGAGGAACATTCTCACAGGATGAAGAGAATTTGATCATTGAA

CTTCATGCAGTTCCTTGGGAACAAGTGGTCGCAAATTGCAGCTAGATTGCCTGGAAGAACTGATAACGAGATTAAGAATCT  
GTGGAACCTCGTCAATTAAGAAAAAGTTAAGGCAAAGAGGGATTGATCCAAATACTCACAAGCCACTTTCTGAGGTTGAGA  
GCGAAGAGAAAAGCGTCGGCAAACAGTAACAATAAGAACAAATGACAAAGTTTCTGAAAGTTCAAATAATGAGTTCAATTTT  
GTTGAGGCTCATGAAAATGGATTCTCAACAGAAAAGGGTATAAATAATATGGAACGTTATCCACTTATCGATCATCAGGC  
CAATAATATTGCCCCACCAACTCATGAATCTTTCACAGCCAATTGCAAGTCACCTGATTTGTCTAGTTATCTCTCCTTTC  
ACAATTATAGTCCCAACACCAATATTCTCTTCAATACCAAAAACCTCTTCTGCTGACAATATGGTATCTGATCATCATCAG  
TTCAATTGTAGCACCTTGCCAAATGCTACCTTTTCCACTATGTATCGAACTCGATTCTCAGTACATCCCCGTTGGCAGC  
TACTTTTAATATCAACAAGTTTCAGAATTGGGAAGCATGTACTATCAGCAGCAACGGCAGCAACAACAGCAATGGCAGCA  
GTAACAGTATCGAATTACAAAGCAACTGTTCAATCTTCGACAACAGTAATGCTGCTGCTGCTGCTTTCACTTGGGGATCA  
ACGAGCGCAGCAGCAGCAGCAGACGGTTCAGGGAAACAGGAGAGGGAAGAAATTAATGGTCCGAATATATGCAACCCCC  
GTTTTCACTAGGTGTTAATAATAACACAATCCAGAATCATCATCATGAAATTTCTCCTCATCATCAAGATTTGTACGACG  
GCGAAACAAAGTCTGAGACACAATTCATGACACATGGCACATGGCTTCAGAATCAAACGCCGACAGACTTCTCTGCAAACT  
GCTGATTTATACAGTAATAATAATTTCCAAAGGCTCCCTGCCGTCTTCGGTCAATTCTCTTAG

>CcMYB48 |Locus\_ID=BC332\_25434 |CDS\_len=669 |strand=+  
ATGGCGCAAGAGGAAATAATGAGAAGAGGACCGTGGACAGAAGAAGAAGATCTGCAGCTTGATTTTATGTTAAATTATT  
TGGAGATCGACGATGGGATTTTCTGGCCAAAGTTTCAGGTTTGAAAAGAACAGGAAAGAGTTGCAGGTTACGTTGGGTTA  
ATTACTTGAATCCTGATCTCAAACGTGGCAAGATGACTCTCAAGAAGAACGTGTAGTTCTTGAAGTTCACTCCAAATGG  
GGAACAGATGGTCAAGAATTGCCGAAAAATACCAGGGCGAACTGATAACGAAATCAAAAATTACTGGAGAAGTCATAT  
GAGGAAGAAAGCTCAAGAACAAGGAAAAAGTCTTCTATTTCTCCATCTTCATCATTTTCCAAGTCGTCATATTCTTCTT  
CAATCTCTCACGAAGAAAATGAGAGAAATTTTTATGATACCGGTGGACTCGAACTCTTGAAAGCTGAAGGAGAAATGAAA  
TCTAGTGATCAAGAACAAGGTGGAGAAAGTATGAAAATTTACTCCATGGATGAAATTTGGAAAGATATTGAATTATTAGA  
AGAAAATGAAGAAACAACGAATAAACCAATTATGGGGTCTATTTCACCCCTATGGGATTATTCTCTAGACTCACTTTGGA  
AAGATTTTGATTGGAGTAGCTTTTGATAA

>CcMYB49 |Locus\_ID=BC332\_11766 |CDS\_len=993 |strand=+  
ATGGGGAGAGCTCCTTGTGTGACAAAAACAATGTCAAGAGAGGACCATGGTCACCTGAAGAAGATGCTAAGTTGAAGTC  
CTATATTGAGCAAAATGGGACTGGTGGAACTGGATTGCTTTGCCTCAAAAAATTGGCCTTAAGAGATGTGGAAAGAGTT  
GTCGGCTTAGGTGGTTAAATTATTTGCGGCCAAACATCAAGCATGGAGGATTTTCAGATGAAGAAGATAGAATTATATGC  
AGCCTCTACATAAGTATTGGAAGCAGGTGGTCAATAATTGCAGCACAACTTCTGGAAGAAGTATAACGATATAAAGAA  
CTATTGGAACACTAAGCTAAAGAAGAAGCTATTTGGAACAACGTCAAAAGCAAGGTTCAAGAAAAGGAAAAAGAAATCA  
AATCCATGTCATCAATTTCCACTTCCAATAACCTGAACCAAAACCTTGTGGCCTGAGCTTCAACCATTACCATACTCA  
AACATGAACCAAGATTCATTAACAATGACCATACATCCATCAGAAAGCTATTAATCAAGCTTGGAGGTAAATTTTCAGA  
AAATGACCAGTTGACAAACGTTGTGCCAAATTTCTCATGAATATCCTATCGATAATTCATCATCGATGCAACTGATGTATC  
AGGATCATATCAATTTGATCTCTTCAGCTCCAATAGATCACAATGTCTTCAACATCACCGCACCAAAATATTGATCTATAC  
AACATGGATGGGGCAGCTAGCAATTTTACGGCTGAATTTGAGCATATGATAAACTAGTCAACAAAAAATAGATGGTCT  
TGAATTTTATATGAGAATCTGGTTATCGATAAATTTACTTCTACTTCTGGAGGAAATTTAGACTGGGAATCGATGAATC  
CTTACGTGCTTCTCTCCCTCCTATTGTTGCTTCTAGTGATGGAGGTTTTCAACAAGGTGTTATATTTCAACAAGGTGCA  
CTTGATGAGCTAAGATACCCCATGGTACAATAA

>CcMYB5-1 |Locus\_ID=BC332\_08856 |CDS\_len=558 |strand=-  
ATGGGTGAAGCACCTAGTTATTGCTCATTAAAAAACTATGACTCGAAAAATGAGGACCACTACAAAACAATCGTTGGTTG  
CTTTGACGAAGACTTTTCATGACATGAAAAAGGATTTGTGGACGGAGGAGGACAGGATATTAATCGAAGCATATGCAG  
AAATAGGAAACAATGGGCAGAAATAGCAAAAAGGCTTACTGGTAGAATCGAGAATTCATAAAGAACCATTGGAATGCT  
ACTAAAAAGAGGCAATTCACAAGACGAAAATGTCTGTAACAATGGTGTAGCCCAAGTTCAATCCTCCAGAATTACATCAA  
AAGTTTGAAGTTGAAAAAGGTAATAATAATTCTGCACCTAAAATAGAGCCAATTGATCAGCAAGTTTCTGCAGATAATT  
ATGATTTTGGTGAATTCGATCTGGAAGACAAGCTGTTTGATGATTTGGAGAATGTTCTAATTATTGTGAATTGGCTCAA  
TTGATCATGCAAGATGCTGAAGTAAATAAGGAGGTTGACTTGATGGATTTTATTAGTCCTAATCCAGAGAATGTATGA

>CcMYB5-2 |Locus\_ID=BC332\_08857 |CDS\_len=687 |strand=-  
ATGGATTTTGTATCCTAGCAGTAAACAAGATGTTTTTTGCACAATCCCTACAGATTATCTTCATGATTTTCATCACCTCGA  
TCTTACTTTTTTCGCTCGCTGGAGGTCCATTAACCTTCAACACGAACCCTGATCATATGCGAAATGGATAGCGGTTATG  
AGCACCCGTTATTGATCCACTCTCAAATCATGGTGATAACTTCTCATCAATGGGTCAAGATTTCAACTTTGGCTATGAA  
TTCAAGCCATTTGAGCAAAATGGCAATGCTAGTGGTAGCACACTATTATGAAGAATTTTGAAGCTCTACGGATATGAA  
GTCCATCAACTTCAATGTTGTGCGTGATGAAAGTTCATGTGTTACTAGTACTATTGAAAACAATGGTACTAATAATGTGT  
ACAATGATAAAGAAATTTGGTGGAAAAAAGAATAAGAAGCTTATAAAAAGCAATGATATAAAATCATCTTCTTCTCATCT  
ATGAGAAAATCAGGAAGGGTACTCGAAAAAAATCAAATCAGCCAAAGATCAATGGACTATTGAAGAAGACAGGATTTT  
GATCAATTTGGTAGAGAAATTTGGAGATAGAAAATGGTCAGAAATAGCAAAAATGTTGAAAGGGAGAATAGGGAAACAAT  
GTAGAGAGAGGTGGAACAATCATCTTAGACCTGATATCAAAGTATGA

>CcMYB50 |Locus\_ID=BC332\_17980 |CDS\_len=1029 |strand=-  
ATGGGTAGAGCTCCATGTTGTGACAAAGCAAATGTGAAAAAGGACCATGGTCACCAGAAGAAGATGCAAAACTCAAGGC

TTATATTGAAGAAAATGGCACTGGTAACAATTGGATTGCTCTTCCCCAAAAAATAGGGCTTAAGAGATGTGGAAAGAGTT  
GCAGGTAAAGATGGTTGAATTACTTAAGACCTAATATTAACATGGTGGATTTACTGAAGAAGAAGACAATATCATTTGC  
AGTCTCTATATTAGTATTGGAAGCAGGTGGTCGATAATAGCTGCACAACCTTCTGGAAGAACAGATAACGATATCAAGAA  
TACTGGAACACCAGACTGAAGAAGAAGCTTCTGGAAAAAGAAAACAATCTCAAATGAATAGATTATTGCTTGCTAATG  
GTGGTCAAGATCTTAAAGAACTAAATGGATTAGAAGAAAATCCATTATTACAAAACCTAAGTAACCTCAGCTCTTGAAAGA  
CTTCAACTTCATATGCAACTTCAAACCCTAACAAACCCTCTTTCTTTTTATAATAATCCATCACTTTGGCCTAAGTTAAC  
CCCTCTTCAACAAAAATGATCCAAACCCTACAAGTTAATGGCTTAAATGAGGATCAACCACCTCTTTACGCGCCGATAA  
ACCCTAGTGAAAACCATGCTCAAGAATTAGGGCAAAAAGTTGGGATGAATGAATTTGCTAGTACTAACTTCAAGGTGAAT  
GATCAAGTGGAAGAAAGTAGTCCAATTGATGTTCTTGACACGAACGTAGGTCAAGAAAACACGAGAGATCAGATCCAGAT  
TCAGGGCGTTCAAGGTTTTACTCAGCTGGAGATCGATGACCTAATTCTCAGCAACAAGGGATCGATAGGCATGAATATGA  
ACTCCGAATTTCGATTTGGCATGGTGGTCTAATGAATTTGATACAAATAGAGCTTCAGCATCAAATTTCTTGGGGTTCATCT  
TCAAAATATTCTTCAAAATACTCATGATGAAATGTATCAAGATTATGCACTAGGGTATAATTTGCAATAA

>CcMYB51 |Locus\_ID=BC332\_22966 |CDS\_len=822 |strand=+  
ATGGGAAGAGCTCCATGTTGTGATAAAGCAAATGTGAAGAAAGGGCCATGGTCACCTGAAGAAGATGCTAAATTAAGAA  
ATATATTGACAAATTTGGCACTGGTGGAAATTGGATTGCACTTCCACAAAAAGCTGGGCTAAAAAGATGTGGAAAAAGCT  
GCAGATTAAGATGGCTTAATTATCTTAGGCCTAATATTAACATGGAGAATTTTCAGATGAAGAAGATAGAGTCATTTGC  
AGCCTTTATGCTAACATTGGAAGCAGGTGGTCGATAATAGCAGCCCAGTTACCGGGGAGAACAGATAACGATATCAAGAA  
TTATTGGAACACAAAGCTTAAGAAGAAATTAATGGGATTTGTCTCTTCATCTCACAAGATTAAGCCTCTTAATCATCATC  
ATTATCAACACCAAATTTCCCACTAATTATAATTACAACAATTATCCCCACAAATTTCACTTTTTCAAACCTTCATCTTTA  
TTAATTTTCATCAAATTATAACACCAACACCAACAACAACACTTTCCCATGCTATGACATAAATGCCCTATAAGTAATTT  
CTTGAGCAATGGTGCATCACTAGCTGTACCTCAGGCATTACTACTAGTACTTTCCAAGAAAATAATTTTCGTGGGGCCCA  
CTGCTACGTCTTCCGACGAGAGTTATGGCGTATCGAATTTAGATTTTCGTACCTATATGTATAATAACGGTGTTATTGGC  
GAAGAAGGAGAGGATCAGGGTAACTCGAAATTTCTTGATCAGTGGAATAATGATGGTGGTGGTTGTTATGTTGATGAGCA  
ACAAAATCCATTAGATTATAGT

>CcMYB52 |Locus\_ID=BC332\_17052 |CDS\_len=1002 |strand=-  
ATGGGAAGAGCTCCTTGTGTGATAAGAATAATGTGAAAAGAGGGCCATGGTCACCTGAAGAAGATGCTAAGCTTAAGAA  
ATTCATTGACAAATATGGAACCTGGTGGAAATTGGATTGCTCTTCTCAGAAAGCTGGATTAAGAGATGTGGAAAGAGCT  
GCAGATTAAGATGGCTAAATTATCTAAGGCCAAATATCAAACATGGTGATTTTTCTGATGAGGAAGATAGAATTATATGC  
AGCTTGTATGCCAACATTGGAAGCAGGTGGTCAATTATAGCAGCTCAATTACCTGGAAGGACTGACAACGATATCAAAAA  
CTATTGGAACACAAAGCTTAAGAAGAAGCTCATGGGTTTTATTATACATCATCTAACCAGAGAATTAAATCACCAAATTT  
TATTCTTGCCTCCTACAACTTTTCCACCCCAAATCCAATCCCAAGCAATTTCAAATATTTTTAAAGATGAATATTTAGAG  
CCCATTTTCATCACTCCAACCAAATTTTCATGTACCACAACAATAACATGAACCTTTAGCTAGGTACAAATAATCAATATTC  
TTATTTTCTTGAAAGCTTAATGAATCCCATGCAAGCAAGTTGTTCTTCATCTGATGGAAGTTGCAGTCAAATTCAGAA  
GTAATTTTGAAGAACTCAAAAGTTTACACTGGATAATTATGGGAATAATGGAGGCACTTGGGCTGATCATGATCAAAAG  
CCAGATGGATATTTTGGGAACAACCATCAAATCATAGTAGTCAATTCAGTATGATACTAGTAATATTGAAGAAGTTAA  
GGAGCTGATTAGTAGTCTCTAGCAATGGGAATGGATGTAATAATAACAGCAATGTGTTGTTCTTCAGTGATGAAAACA  
AGGCAAATATAGGGGCTGTTCCAGCCTTAACCAGAGGTCGAGGGTTCGACCCTGAGTATGGAGAAAACCTCTGTTGGGAGC  
GCTGCCACCTTAATGGGCCCTGTAAAGCGCAATCCGGATTAG

>CcMYB53 |Locus\_ID=BC332\_05620 |CDS\_len=993 |strand=+  
ATGGGTAGAGCACCTTGCTGTGACAAAGCCAATGTAAAGAGAGGACCATGGTCACCTGAAGAAGATTCCAAACTCAAGGC  
CTATATTGAGCAACATGGCACGGGTGGTAACTGGATTACCCTTCCACAGAAAGTCGGTCTCAAGAGATGTGGCAAGAGTT  
GTCGGCTTAGATGGCTGAATTATCTCCGGCCAAACATCAAGCACGGAGAGTTCACCGATGAGGAAGACACCATAATCTGC  
ACTCTCTACATGAGTATTGGCAGTAGGTGGTCAATTATTGCTGCACAATTACCTGGGCGAACGGATAATGATATCAAGAA  
CTACTGGAATACAAGGCTGAAGAAAAAGCTACTATTATGCAATAAGCAGCGAAAGGATCATCGGCCGCGGACCGGATACA  
ATCACAATAAGGTAGATATGATGAAGGAACAGGAGGATTTCTTTGCTACTCATCAAACCACCAACAATGCATATTCTTGG  
TCTCCGCAACAAATACTCTTCTCTACACTAATTGCACCACAAAATCATGACGTGGCAGAATGCAGTGCAAATAGCCACAA  
CTTTCATACTCCAGCACTGATCAAGCTTATTTCTCCCAAGATCAATTGTGTCAAATTAGCTCCACCAATCATCTTGCAT  
CGATGAATCCGGTAAATGGCGCTACCTGTAATTCCTCAATGATGGTAAGCAGTGGCGCCTATTACCCGAGCAACGGGTTT  
TGCAACAACGGTCTGCAAGAGTATAACAATTACATTTCCGTTGGGCTGGATCATGACGTGCTCAACAGTACTAGTACTGC  
TCATTCTCAGCAAGTAGATAAAAGTGATTGGAAATGGTCAATAGTAGCACTATTAGTACCACATCACAAGATCAAAGTA  
CAAGCTGGGAAGAATTGAGCCCTCTTGTTAATTATCCTCCATCAGTATTCGAAACCGTATCACCTTATTATGATTTGAA  
GAGCCAAGGTACCTGGGGTTGTTGAAACAGTAA

>CcMYB54 |Locus\_ID=BC332\_24646 |CDS\_len=807 |strand=-  
ATGGGAAGAGCTCCTTGTGTGACAAAACCAAAGTTAAAGAGAGGACCATGGTCACCTGAAGAAGACAACATTCTCAAGAA  
TTTTCTTGAGAAAAATGGCACTGGTGGCAATTGGATTGCTTTGCCTCAAAAAGCAGGTTTAAAGAAGATGTGGAAAGAGTT  
GCAGATTAAGATGGCTAAATTACCTAAGGCCAGATATTAACATGGAGGATTTACTGAGGAAGAAGATAATATTATTTTA  
AATCTCTATAATCAAATTGGAAGCAGGTGGTCAGTAATAGCTGCAAATCTACAAGGAAGGACAGATAATGATGTGAAGAA  
TTATTGGAATACCAAATTGAAGAAAAAGCTTTGGCTTCTCAAATACTAATATTATAAGTACCAACAATAATATTAATT

CTAGTGATTTTAAATCACATTAATTATTCAAGAAATTACTATGGGACATTGGATTATTCTAACACATTCACAAGTCATATG  
GACCCAAATTTAACCAATTATTCAAATAATTGTGATCAATGCCCTCTTCTTCTTCTTGGTGGAAATTCAAGAAAATGA  
TGCAACAATTCAATCGTCGGAATCATGTGATCCTCCAGAAGTGTGCAACTTTGAAAGAATCCGACACGCATCCTTCGA  
CGTTTTTGCAGAAATCCGAACAACATAGGCTATAATTATTACGATGATATTCTTGAAAATGGATTTGATTTTCAAGAAAAT  
GCTATTGGAGGAGCTAATCCAAATTCTTCATATTACAATAATATTCTTGAAATTGATGATCAACTTTTCAAAGGATTTGA  
AAATTAG

>CcMYB55 |Locus\_ID=BC332\_07302 |CDS\_len=303 |strand=+  
ATGGGGAGGACACCATGCTGCGATAAGACCAAAGTGAAAAGGGGACAGTGGTCTCCAGAGGAAGATGAAATTCTCAAGAA  
TTATATGCTTAAACATGGCACTGCTGGCAGTTGGATTACTCTTCCACATAAAGCTGGGCTAAATCGGTGCAGCAAGAGTT  
GCAGATTAAGATGGCTGAATTATCTGAGACCAGACATCAAACCTTGAAAATTTACACAAGAGGAAGACAACATTATCCAT  
TCTCTCTACTCTCAACTTGAAGCAGGCTAAATCTTGCTCTTCAACCTTTATTTATTTCTCTAA

>CcMYB56 |Locus\_ID=BC332\_24914 |CDS\_len=1023 |strand=+  
ATGGGAAGAATTCCATGTTGTGAAAAGGACAATGTCAAGAGAGGGCAATGGACTCCTGAGGAAGATCACAAGCTTTTCATC  
TTACATTGCTCAACATGGAACCTCGTAATTGGCGTCTCATTCTAAGAATGCTGGTTTACAGAGATGTGGAAAAAGTTGTA  
GATTGAGATGGACAAATTACCTTAGGCCTGATCTCAAACATGGCCAATTTTTCAGAAGCAGAAGAACAACCAATTGTCACA  
CTTCATTCTGTTCTTGGAATAGATGGTCTGTGATTGCTGCTCAACTGCCAGGTAGAACAGACAATGATGTCAAGAACCA  
TTGGAACACAAAGCTCAAAAAGAGACTATCTGGTATGGGCATTGATCCAGTAACACACAAGCCATTTTCTCACTTAATAA  
GTGAAATTGCAACAACATTATCTCCACCACAAGTCCCTCATTTAGCAGAAGCAGCACTTGGTTGTTTCAAAGATGAAATG  
CTTCATCTTTTAAACCAAGAAAAGAATTGGTTTTTCAGTTTCATCAACAGTTTCAAATAATGCACCAAGTACTAGTCATGT  
CAAGAATGAAGAGAATGACACAGTTGAGAAGATCAAGTATGGATTGTCAAGAGCTATTAAGGGAAGTGACAAGAATTGGG  
AGACAAATGGAGGAGCAACATCTAGTAGTTTTTCATGATAATGGTGGATATAGTAACATAACTTTGCTAATTTGCTTAAC  
GACGAAGACGGTTCACCATGGAACCAAGTTTGTGTAGTGGAAGTACATGCACAGCAGGAGGAGAATTACAACAACAACA  
ACAACAACAACGCAACAAGAAAAGTAGCAATGGTAATTGTGAGGATAGTGGTAAGGAAGTGGTAACAACAAGAAATGGAT  
CAACGACAACATATGTTCAATTCCGACTGTGTTCTGTGGGATATTTTCATCTGATGATCTGATGAATCCAATGGTGCTCCGT  
GGAAGTAGTCAAGGTGAGCGCAAGCTGACCGAGACACCAGAGTCATTTAAGAAATCATTGTAA

>CcMYB57 |Locus\_ID=BC332\_10902 |CDS\_len=999 |strand=-  
ATGGGAAGGCCTCCTTGTTGTGACAAAGCAAATGTGAAAAGAGGCCCTTGACTGCTGAGGAAGATGCAAAAATTCTTGC  
TTATGTAGCCAGTCATGGAATTGGCAACTGGACTCTGGTCCCTCAAAAAGCAGGTCTGAATAGGTGTGGAAAAAGCTGTA  
GGTTGAGATGGACAAATTATCTGCGTCCTGATCTTAAGCATGACAACCTCACATCTCTAGAAGAAGAATGCATCCTTGAG  
CTTCACAAAACCATAGGTAGCAGGTGGTCTTTAATAGCAAAGCGATTACCTGGGAGAACAGATAATGACGTCAAAAATTA  
CTGGAACACAAAGCTGAAGAAAAAGCTAGTGAACATGGGAATTGATCCTGTAAACACATAAACCATTTGCCCAGGTCTTTG  
CTGAGTATGGGAAAATTAGTGGTCTCCCAATTCAAAATGCAAAAATCACATCCATTTGCCCAACAATACCACTGAAAAA  
AACCATGTTTGTATGGAATCAAAGCAATTTCCATTCTCAAATGGGACTCCCATGATAAGTTTGTTCATAAGATTATGAA  
TGACCAGTTGCAAGAGAACTACATAAAATTACACATGGGATTCTAAGGAGACTCTTCAAACACATAGTTCCCTTTTGA  
TTTCAACATCAACTTCTTGTAATCCCACAGTACACAGCTACTCCCTTCTTTTTCTTCTGTGCAATCTCAGGTTCATACT  
ATGCCAGTTCTACGTCTACGTGTAATTGGAACGAGTTTATATTTGGAGACCCTTTTACATCATCAGGTGCAGAGCAAAA  
ACAGGAGACATTTTTGTCAAACCTTACTTCAGAAGGAGAATCCTACTTGTGGGGAAGTTACTGAAGTTGAGGAAAAGCAGC  
TTGTTGAAGAAGCCACTTGTCTCTGCCATGGATTCAATCGTGGACACTATCTTGCTAACGAAAAGCAAATGCTAATG  
GATTTTCCACCATTCTAGATGTCTACCTCGATTATTGA

>CcMYB59 |Locus\_ID=BC332\_07716 |CDS\_len=753 |strand=-  
ATGGAGGTGATTATAATTAAGAAGGGGGCATGGTCTCCAGACGAAGACCAGAAATTGAAATCTTATATCATGAGATATGG  
CATCTGGAATTGGAACCTCATGCCAAATTTGCAGGGCTTTCAAGGACGGGCAAAAGTTGTAGACTACGATGGATGAATT  
ATCTTCGCCCTGAGGTAAAGAGAGGACCCTTTACCATAGAAGAAACGGAACAGTAATCAAAATGTATCAAGAATTGGGA  
AACAGATGGGCAGCTATTGCAAGGAGATTGCCAGGAAGAACAGACAATGAAGTTAAAAACTTTTTCCACACACACTTAAA  
GAAGCATCTTGGACTGAAAATTGATCAGAATGCCTCAGTGAAGCTGTGTAAGGCCGTAAGACGCAAAAGAGTACTGGAAA  
AGACCAAGAAAAGTGACAAGAAAACTTAGCTCAAGAAAAACCTGTATTGTATCTGGATATTTCTGGAACATCCAGCAAC  
AAGAGTAGTTTCACGATATCACCTAGTGGTTCTTCATCCAGTAGCAGCATTATTACAATCGACCAAAATCAAATGACCGA  
TATTCATGTGGATCAACCAAAATTCAATCATTGACGACATGGAACTACCGTTCTGATCTTGGAAGCAATCCTGCAATTA  
GTACTCACCATGATCAGTCCTTAGACAGTTTGAGCATTGATTCAATGTATCAGTTTGACACGAGTTCATTCTGGCTTCAT  
CTACTTAATGATGCCCATCGTCTTATTTTCTGA

>CcMYB6 |Locus\_ID=BC332\_16696 |CDS\_len=1284 |strand=-  
ATGGAACCTTGATCAAAGTAACAACCAAAACCTTTCAATTCATCAGCCATTTTTTATGCCCAATAACAACATTTTTGAAACC  
AGAAATTGATGATGATTTTTTGCATAGACTCTAAAGATTATTATCTTAAAGATTTTGAACACCTTGATCTTAATTTTTCTA  
ATACCACCTTCAACAATTTTTCTCAAAATTTTTATGATTGATGATGATACCAATGGTACTACTTATCATGACCCCTTTGAT  
CCATTTTCAAATATTGAGGATAATTTTTCTCGTTAGGGGATTTTAACTTTAGTAGTCATGAGCTTACTCCATTTGATCA  
AGAAAATGGAGAGAGTGGTGGTAGCAAAGTAATGAAGAATAATTTTCATGATGATGAATTTATGAAGCCTAATTTGAACT  
TTGTTAATGTGCCTGATGATCAAAGTTCATGTGTCACTGGTGATAACAATTTATCTTCATCTATTAAGAAAAAGCTAGGT

GGTAGAGGGAGGTCTGAAGAAGTCGTCCAAATCGTCCAAAGGACAATGGACGATTGAAGAAGACAGGCTTTTGATCCATTT  
GGTAGAGAAATTTGGAATTAGAAAATGGTCTCAAATTGCTCAAATGCTCAAAGGGAGGATAGGCAAGCAATGTAGGGAAA  
GGTGGCACAAACCATCTTAGACCTGATATAAAAAAAGATTTTTGGACGGAGGAGGAAGACAGGATCTTAATCGAAGCTCAT  
GGTGAAGTGGGAAATAAATGGGCAGAAATTGCAAAGAACTTCCTGGAAGAACTGAGAATTCAATTAAGAACCATTGGAA  
TGCAACAAAAAGAAGACAATTTTCAAGAAGAAAATGTCTGACCAAATGGCCGAGACCTAGTTCTCTTCTCCAAAATTACA  
TCAAAAGTTTGAATTTAGAAAAAGGAAGCACCACAAAAAGACACAAATCCCAATGGTCGCATGGAGTATACAGGTTCAAGTC  
GCTGAAAACAGAAATGAAAATTTGGCTAACAGGCCTAAGCGCCATGCTAATATAGCCAAAGTGAAGGTGTGCGCTAAGCT  
AGAAGCGATTGAATTTTGCCAAGACAATAATGCTGGTGATTTTGATTTGAGCGAAGTGCCAGAATTTGCATTGGGTGATA  
ATTTTTTTGATGAGAATAAATCAATGGATGCTTTTATGGAAGAGATTAATCCTAATGTTGGTACTTCCATTATGCCTTGT  
AATTATGAAATGCCAACATTGATGATGCAAGGTGAAGTCAACAAGGAGATTGATTTGATAGAGATGATTTCTAGAGTTAA  
TTAA

>CcMYB60-1 |Locus\_ID=BC332\_03169 |CDS\_len=603 |strand=+

ATGTTTTCTAAATCTCCTGAACCTTTGGTCGCACGTGGTTGCAGGGCTTTCACGTACAGGGAAAAGTTGCAGACTTAGATG  
GATGAACTATCTCCACCCTGATGTTAAGAGAGGACCTTTTACCATGGAAGAAGTCGAAACAGTGATCAAAACATATCAGG  
AACTTGGAAGCAGATGGTCAGCCATAGCAACAAAATTGCCAGGAAGAACAGACACCGAAGTTAAAACTTCTTCCACACA  
CACTTAAAGAAGCATCTTGGACTGAAAAATTATGATGCCCACTGAAGACTAGGAAAGGCCACAAACAAACCCAAGAAAA  
TGAGAAGGAAAATAGTACTCAAGGAAGACTTGTGCTTGAACGATCAACAGCAGCAGTTTATTATCACCAGATGTTTGTT  
CACCTGTCAGCAGCAGTATTACATGTAAAGAAAACCAAATGATGGATCAGTTCACGAATTTCTCACTTGTTGTGTCATCAA  
CAAGTTTCCCACGTGGAAAACACAAATATTCAGTCATGTTTCATTCCCGGTGGTTCTACCTTTAGCACCTTCGATCAATT  
CGATATGAACTCATTCTGGTTTGATGTACTTGAAATTTCTGA

>CcMYB60-2 |Locus\_ID=BC332\_07717 |CDS\_len=594 |strand=+

ATGCTAAGAGTACCACAACAACAACAGCAGAAAGGGCTTTCACGTACGGGGAAAAGTTGCAGACTTAGATGGATGAACTA  
TCTCCACCCTGATGTTAAGAGAGGACCTTTTACCATGGAAGAAGTCGAAACAGTGATCAAAACATATCAGGAACCTTGAA  
GCAGATGGTCAGCCATAGCAACAAAATTGCCAGGAAGAACAGACACCGAAGTTAAAACTTCTTCCACACACACTTAAAG  
AAGCATCTTGGACTGAAAAATTATGATGCCCACTGAAGACTAGGAAAGGCCACAAACAAACCCAAGAAAATGAGAAGGA  
AAATAGTACTCAAGGAAGACTTGTGCTTGAACGATCAACAGCAGCAGTTTATTATCACCAGATGTTTGTTTACCCTGCA  
GCAGCACTATTACATGTAAAGAAAACCAAATGACGGATCAGTTCACGAATTTCTCACTTCTTGTGTCATCAACAAGTTTCC  
GAAGGGGAAAACACAAATATTCAGCCATGTTTCATTCCAGTGGTTCTACCTTTAGCACCTTCGATCAATTTCGATATGAA  
CTCATTCTGGTTTGATGTACTTGAAATTTCTGA

>CcMYB61 |Locus\_ID=BC332\_19187 |CDS\_len=690 |strand=+

ATGGTGAGAACACCAATTATTGACAAGAATGGAATAAAAAGAGGTGCATGGAGTGAAGACGAAGACAACAAATTAAGAGC  
TTATGTTGAAAGATTTGGTCATCCCAATTGGCGGCAATTGCCTAAATATGCTGGTCTAATGAGATGTGGGAAGAGCTGCA  
GACTGAGATGGATGAATCACTTGAGGCCTGGTTTGAAGAAAGGCAATTATAGACTTGAAGAGGAACAACCTCATAATTA  
TTACACAAGGAACGGGTAACAGATGGTCAGTGATTGCTGCAACTTACCAGGAAGATCGGACAATGATGTGAAAAACCA  
TTGGCATGCTCATCTCAAGAAACGTGTGAGACTAACAAATTGTATCAATAATTCATCAATGTCTATGGAGCAATTTACTG  
AGTCTACGCAGTCTGGATCGTCTCAATTAGATGAACGGTCTGCTAGTATGAATGTTGTTGTTGACACTTCACCAACCTTA  
CTGCCAATCTCTTTCCAGAGGTTTCATCAAGTGATTTATATTCCATAACGGACTGGATCGAAGAAGAGTCAATGGAACA  
ACTTCCTATTTTGAGTTCAATGGAACACTTGCAGCAGACACTTTTTCTGGACAAATTATCCCATTGACAATTTTCAGA  
CAGAATCCTTTGACCATTTTTGGACCCAACCCTTCGATACTTTCTTTTAA

>CcMYB63 |Locus\_ID=BC332\_19183 |CDS\_len=744 |strand=-

ATGGTGAGAACACCTTGCTGTGATGAAAATGGAAGGAAGAAGGGGACATGGACTCCTGAAGAAGATAGGAAATTAGCAGC  
ATATATCACTGAATATGGCTCATGGAATTGGCGCCAACCTTCCCAATATGCTGGACTAGAGAGGTGTGGAAAAGAGCTGCA  
GACTTCGATGGCTGAATTACTTAAGGCCAAATGTTAAAAGAGGGAACCTACACCGAAGAAGAAGATGAAATCATCTTAAAC  
CTCCATGCTCAACTTGGAATAAAGTGGTCGGCGATTGCAGCTCACTTGCCAGGAAGATCAGACAATGAGATAAAGAATCA  
TTGGCACACTGCACTCAAGAAGCGTGCAATAACTCAGGTGAATCAAGCAAGAAATGCAACAGTAAGAACAACATTAGAA  
GGAGTACTAGTGTGGCAAATAAAAATGCAAGTCCTAGCACTTCACATGAAAATATAGTACTGGAAAGTTTCACAATGGTCC  
CCAAAGGAGTCATCAAGTGAAGACTTTTTTTCTTACAGTAATACTGATTATCAAGAGCAACATAAAGTTTTTCAACAAGA  
AGCTTTGGATGAAATAACTAGTGAAGCTTTTGGACAGAACCATTTCTAGTGGAAAGTTTCAATACAACCTGGAAGTATT  
TTCTAGCTCCTCCAATTGATTACTGTGGACTTGTGTGTCCACCTTCTCCTTTTATAGGTCATGAATTTCTTTCATCCTTT  
GATTTTGATCATTTTAATTATTA

>CcMYB64 |Locus\_ID=BC332\_19182 |CDS\_len=411 |strand=-

ATGGTGAGAACACCTTGTCATGACGAAAAAGGAAGGAAGAAGGGGAACGTGGACACCTGAAGAAGATAGGAAATTAGCAGC  
ATATATTACTAAATATGGCTCCTGGAATTGGCGCCAACCTTCTAAGTATGCTGGACTAGCAAGGTGTGGAAAAAGCTGCA  
GACTTCGATGGATGAATTACTTAAGGCCAAATGTTAAAAGAGGGAACCTACACCAAGAAGAAGATGAAATTATCTTGAAC  
CTTCATGCTCAACTTGGAATAAAGTGGTCGGCGATTGCTGTTCACTTGCCAGGAAGATCAGACAATGAGATAAAAAATCA  
TTGGCACACAGCCCTTAAGAAGCGCGCTAATTATGTGTCAACCTCAAGTGATGTGTCAAGCAAGAAATCTAATAAGAAGA  
AGAATAGTGA

>CcMYB65 |Locus\_ID=BC332\_19186 |CDS\_len=747 |strand=-  
TTAGCAAGGTGTGGAAAGAGCTGCAGACTTCGATGGATGAATCACTTAAGTCCCAATGTTAAAAGGGGGAACTACACCAA  
AGAAGAAGACGAAATCATCTTGAACCTCCATGCTCAACTTGGAAATAAGTGGTCGGCAATTGCGGCTCACTTGCCAGGAA  
GATCAGACAATGAGATAAAGAATCATTGGCACACAACACTCAAGAAGCATGCTACCAATAATGCCACAACTCATCAAGT  
GATAAATCAAGCAAGAAATGTAGTAATAAAGAATAAGAATACCAAAAGTAATGCCAGTAAAGATGCAAGTCCTAATAA  
TAATATGCATGAAAATGTTATACTAGAAAAGTTCAGAATGGTCGCCAAAAGAGTCATTAAGCGATCAAGAACTAATCTCCT  
CTGATTCCACTAGTGTGATTATCAAAACGACGTTTTTCAAGAAGAAAATTTGGTGGAAATACTAGCGGAAGCTTTTGG  
ACAGAACCATTGTTGTAGAAAAGTTTCAATAGTCCTAGAATTGATTTTCTAGGTCCACCTTCAATAGATTATGGACTCGT  
GTGTCCACCTTCTCCTTTTATAGGTGAAGGATTTGTTTCTCCTTTGATCTAGATGATTATAATTGTGGCAGAATTGTTG  
AAGAAGCTGAAGATGGAAAGAAGCAACATACAAAGAAGAAGGAGAAGACAAAAAAGATGAACAGAAAGAAGAAAAAGAAG  
AAGCAGACAAAAAAGATGTGGTCTTAG

>CcMYB67-1 |Locus\_ID=BC332\_06786 |CDS\_len=837 |strand=+  
ATGGTTAGAGCTCCTTGTTGTGAAAAGATGGGGTTGAAGAAAGGACCATGGACACCTGAAGAAGATCAAATTCCTGTTTC  
TTATATTCAAGCAAATGGTCATGGCAATTGGAGAGCCCTTCTAACTAGCTGGATTATTGAGATGTGGAAAGAGTTGCA  
GACTTCGTTGGACAAATTATTTGCGTCCAGATATAAAGAGAGGAACTTCACTAGAGAAGAAGAAGATAGCATTATCCAA  
TTACATGAAATGCTTGGCAATAGATGGTCTGCAATAGCAGCTAGATTACCGGGTCGAACAGACAACGAGATTAATAATGT  
ATGGCACACTCACTTGAAAAAAGGCTTAAAAATTATCAGGCTCCTGAAAATTCAAAAGACACTGCAAAAAGAACATTG  
ATTCCAAAGCTCCTAGTACTTCTCAAATTACCTTGAAAAGTTCACACAATTTTAGCAACATCAAAGAAGGCATTAATGGG  
CCCGACCCGAACCTCGCCACAATTGTCGTCTAGCGAGGCATCGACCGTCACGGCCGATTCTGAGTCGGTCATGACGATGGG  
TGTCACAAACGGTGGTGATCAGATGGACTCGTATGAAAATTTTATTCCAGAGATCGATGAGAGTTTCTGGACAGACGATT  
TATTATCTACGGCCGATAACTCGAGTTTCGATATGGCAATTAGTGGTGGTGAAGAGTTACAAGGTCAATTTCTTTTTAT  
GACATGAAGCAAGAAAGTGTGGAGTTAGATGTTGGAGCAAAATTAGAGGATGATATGGACTTTTGGTACAATGTTTTCAT  
AAAGTCTGGGGACCTATTAGAATTACCTGAATTTTGA

>CcMYB67-2 |Locus\_ID=BC332\_10106 |CDS\_len=333 |strand=+  
ATGGTTAGAGCGCCTTGTTGTGATAAGACAGGTTTAAGGAAAGGGCCATGGGCTTTTGAAGAAGACCAAATTCCTTATATC  
CTACATTCAAAAATATGGTCATGGCAATTGGCGCGCTCTTCTAAACAAGCCGTCGTGACATCTGATTCATCATCGTCGA  
TCATCGCCTTTGGAGTGACGATCGACAATACGATAGCGTTAACTGGAAGAATCGGACTCGTCAGAGTATCTTACCGAG  
ATCGATGAGAGTTTCCGGACAGACGATGATATGGACTTTTTGTTCACTTTTTCATAAAGGCTGAGGACTTTTCTAGAATT  
ACCAGAACTTTGA

>CcMYB68 |Locus\_ID=BC332\_15553 |CDS\_len=843 |strand=-  
ATGGGAAGAGCTCCTTGTTGTGAGAAGATGGGGTTGAAGAAAGGGCCATGGAGTCCTCAAGAAGACAACATTCTCATCTC  
TTACATTCAAAATAATGGTCATTCTAATTGGCGTGCCCTTCTAACTTGCTGGATTATTGAGATGCGGGAAGAGTTGCA  
GACTGCGGTGGACTAATTATTTGCGTCCAGATATAAAAAGGGGAAATTTAGCAAGGAAGAAGAAGACACCATTATCCAG  
CTTCATGAAAACCTTGGCAATCGATGGTCTGCAATAGCAGCAAGATTATCGGGACGAACGGATAATGAAATAAAAAATGT  
TTGGCACACTCACTTGAAAGAAGAAGCTCAAGAATTATCAACCTCCTCAAAATTCAAAAGACACTTCAAACTAATCATG  
ATTCCAAAAGGGTCTACTACTGAATCATCCAATAATTCTGATTTTAGTACTAGTGCTAATAACACCAACACACATAAA  
AAACACATGAAAATTGCCCCCACTCACCAGTACTTTTCTAGTGAATGTCAACTGTGACATTAGTAGTCGATGATCG  
TCAAAGGGTGATTATTAAGGAAGAAAAAATAGAGTCGCCATTGGAGTATTTTCTAAGATCGATGAGAGTTTCTGGACAG  
AAGAATTGTCAGCGGAGAAAAAATATGATAACGACTACGTTATGGCTGCTGGTCTTGATCAAGATATACAAGCTCAAATT  
CAATTGTCCAGTGTGAAGGAAGAAAATTTGGACAATACTAGTACAAAAATGGAGGAGGATATGGACTTTTGGTACAATGT  
TTTCATAAAGACTGGGGACTTTCTAGAATTACCGGAATTTTGA

>CcMYB69 |Locus\_ID=BC332\_17589 |CDS\_len=852 |strand=-  
ATGGGGAGAACTCCATGCTGTGAGAAGTTAGGATTGAAAAGAGGTCCATGGAGTAAAGAGGAAGATGATTTACTCATAAA  
TTACATTAATAAAAAATGGTCATCCTAATTGGCGTGCCTTCCCAAATTTGCTGGTCTTTTGAAGATGTGGAAAGAGTTGTA  
GGCTTCGATGGACTAATTACTTGAAACCTGATATTAAGAGAGGGAATTTTACTAATGAAGAAGAAGACACCATTATCAAG  
TTGCACCAAGTTCTTGAAACAGGTGGTCGACGATTGCAGCAAGATTACCAGGAAGAACAGACAATGAAATAAAAAATAT  
TTGGCATACTCGTCTGAAAAAGAAAATAAGTAAATCTCATGCTCAAAAAATTCGGAGTTACAAGAAGAAACATCCATGG  
AAACATCAAAATCTGATGAACAAAATTTGGACACACATTTAGAGCCTGAAAATTTCTAATTTGGATATACATTTGGAGTCT  
GATAATTCTAAGGATAATTGTGAGATATCGAGTCCTAAACAAATAACGAGATTCAACAACAATCAAGTTCTTCGGTACA  
TTCATCATCATCGATATCATCATCGAGTGAAGATGCATGTTCAAACACAACACTGCAACGAGTCCGGAGCCAAGAGATCAAT  
TCATGTTGGATAATTTGGTTGAAATTGATGATGATTTTTGGTCCGACGTACTATGGACAACGGTCGATGACTCTAATTAT  
AATGACAATAATTTTGATTTGCCATTAATGGAGGATAATTATCAGATTAATCCTAGCTTGAATGATAACTGGTTTTGGGA  
TGATCTTTTTACAAGATCCAATGAGTTAATGTTAGAATTGTCAGAATTTTGA

>CcMYB7 |Locus\_ID=BC332\_17369 |CDS\_len=1026 |strand=+  
AAACTGCTGAGGTTGGTAAAACAATTTGGAGTAAGAAAATGGGCACAAATTGCTGAGAAAATGGGAGCAAGAGCAGGAAA  
ACAGTGTAGAGAAAGGTGGCATAATCATCTACGTCCAGATATTAAGAAAGATACATGGAGTGAAGAAGAAGAGTTGCTGC

TAGTGGAATTACACAAGCTACTTGGAACAAATGGGCTGAAATTGCTAAAAGAATTCTGGAAGGACTGAAAATGCAATC  
AAGAATCACTGGAATGCCACTAAAAGAAGGCAAAATCAAGGAGAAATAAGAACAAAAAACTCAACAAGCTGATGGCAC  
TCAATGTGAAAACAAATCGCATCGTTCCACCGTTCTCCAAGATTATATTAGAAGCAAATATTTTCATGAATGATGATAATT  
CTCCCCTCACCGCTACCCTATATTATGGTAGCGGTGGTACAGCTAGTGGTGGTGGGTACAGTCCCTCCACCACTACTTTC  
ATAGGAAGTACTAGTAACGCGACCAACGCTACACCAACATACTCTGACGATGATTCTCCATATTTGATCACTCATCAAAC  
ATATGATGAAGAAATGAATTCATGCAAAGTTTATTTGGAAATAGCAATAATATCAATGGTACTAAGGTCATGGGCTACTA  
TGGAGACAAATGTAGTGACTCAAGATCTCCTCGACAAGAGCTCGTCGAGCTCTTCTTTTGGTTTGAATCCTCTGGTGAA  
ATCCCTCTAGCTGAGTGTAACGTTGAGAGTTACACTACAACAAAAAGGGTGATCGCGGACAATAATGCTAGGAATTACAT  
CCCTGATTATTCTCAATATTATCCTCAAGACCTCTATTTATCGCGCCTTCTAGATGGTTCATTGGTGCCTAATTATTACAG  
ACTGTTTTGAATGTGGAAGCATGAATAATCAAGCTGGTTGTTCTTCATCAGGAGGAAACATTAAGGAAGTTGATTTGATG  
GAGATGATGAATTCAACTAATTCTCAATTCTCTCAACCTGGAACCTTCAACAAAACTTTCTTTTGA

>CcMYB70 |Locus\_ID=BC332\_14283 |CDS\_len=444 |strand=-  
ATGTTCTTTTTCTTCAGATGGTCTGCAATTGCATCGAGTTGCCAGGAAGAAGTATAATGAAATCAAAAAATTTCTGGCA  
CACTCACTTGAAGAAAAGATTAGAACAACACAATATTGATCTAGCATCTACTACAACCTACAAAACAAAACCATGAAATGA  
CAACAAATGTTACACAAAATATTGACCACCATATAATATCTCAAATTATTATCAAGATTCTCAAAATATGGTTACTTAT  
CATCCAACCTATTGTTCATGATCATCAAGAAGATTTTCAAGAAAATAATTCAAGTTCTCATGATCATACTCAATCAAACAA  
GGAGGAGATCATGCAATATTCAACAAATTATGGACATGAAGACATGACTAGTTTCAATAATGATATGGTTTTTTGGTATA  
ATGTCTTCATGAGTTCAGGAAATAACCCGTCGAGATCAGTTAG

>CcMYB71 |Locus\_ID=BC332\_24933 |CDS\_len=678 |strand=+  
ATGGGTAAAGGAAGAAGAAGTTGTTGTGATAAAAGTGAAGTAAAGAAAGGGCCATGGACTCCTGAAGAAGATTTGAAGCT  
TATTTCTTTTCATTGAGAAACACGGTCATGGCAATTGGCGCGCCCTCCCTAAACAAGCCGGGCTAGTGAGGTGTGGGAAGA  
GTTGTGATTGAGGTGGATTAACCTGAGACCTGATGTAAAGCGAGGGAATTTACCTCACAAGAAGAGGATACTATT  
ATAAACCTACACCGCTCTTTTGGGAATAGGTGGTCAAAGATAGCATCTCATTTACCAGGAAGAACGGATAATGAGATTAA  
AAATGTATGGAATACGCATTTGAAGAAGAGATTATTACTCATGAAGAAAGAGGAACACAATTCTCCTTCATCAACACCAA  
CATGTAGTAGCACTACTTTAGGGTTTTGCTCTCCAACCTCTTCGAAGGCCAATGATCAAGTGATCGACTTTTTGGGAATAT  
ATGTTGGATACTAGTAATCCTACTAGTATTAATAATTTGGATCATTTTCGACAGCTATTCCAAACAGGACACTACTAGTAC  
TAATACCGAACATCATCAACCTCAGATGGCCGACGAATATGAATGCCAAAAGTGTTGACATACTTTGGAGATTGAACCTTG  
GACTAACACAAATGAAGCACAACACCAATAAAATAA

>CcMYB72 |Locus\_ID=BC332\_20160 |CDS\_len=888 |strand=-  
ATGATGGGAAAAGGGAGAGCACCATGCTGTGATAAGAGTAAGGTGAAGAAGGGTCCATGGAGTAGTGAAGAGGATATCAG  
ACTCATTGCTTTTTATTGAGAAACATGGTCATCAAACTGGCGATCCCTCCCTAAACAAGCTGGGCTGCTGAGGTGTGGGA  
AAAGTTGTCGTTTGAGGTGGATTAATTACCTAAGACCTGATGTAAACGAGGAAATTTACCCCTCAAGAAGAGGAAACT  
ATCATCAAATTCACCAATCTTTTGGAAATAAGTGGTCAAGAATTGCGTCTCATTTGCCTGGAAGAACGGATAACGAGAT  
TAAAAATGTTTGGAAACACACACTTGAAGAAACGACTCATGAAAAGGTTGCATGGTGATAAAGCAAAATTAGACGGTACAT  
GTGCTAATTCACAATCTTCCTCTTCATCAACTTCAGTAGTATCACATACTGATGATACTTCCAATGAGGGAAAATTCAG  
AACGTAGACGCCAATATGATAATTGAGAAATGCAACCAAGAAGAAGAAGCAACAAAATCCTGCTCTCCTACTTCTTCCTA  
CGCTCAAAATTTGAGCCAAGTTCATGAGGCTTCAAGTCAAATAATGTAGACATGGATTGGATATTCGAATTCAGTGAGG  
AGCCTTTTCCAAGTACTACAGCGAGAAAGGTGCATGATGACGACGACGAAGGGATAATTGAAATCCCATTGGAATGTGAT  
GTTGATTTTTGGGACATGTTAGATATTATGGGCCCTTCTCCTCCTCCTCCTCCTCCTAATTCAGAATCCAAATTGGA  
CCATCACTCTGAAGCGTCTTGTCAGGGCTTGTCAGAATTCGAACGTCAAAGTGTTTACATACTTTGAACGTGAATTGG  
GTGTTTGA

>CcMYB73 |Locus\_ID=BC332\_21478 |CDS\_len=933 |strand=+  
ATGGGGAGAACACCATGTTGTGATAAGAATGGTCTGACTAGAGGACCTTGACACCTGAAGAAGATGAGAAGCTTGTTGA  
GTTTATCAACAAGAATGGTCACGGTAGCTGGCGTTCACTCCCTAAACTTGACAGTCTTCTTCGTTGTGGGAAAAGTTGTC  
GTCTTAGATGGACGAATTATCTAAGACCAGACATCAAACGAGGTCTTTTAGCCCCGAAGAACAGAAGCTTGTACATACAG  
TTACATGGCATTCTTGGAACAGATGGGCTGCAATTGCTTCACAATTACCTGGGAGGACAGACAATGAGATAAAGAATCT  
ATGGAATACTCACCTGAGAAAGCGTCTGCTTTCCATGGGCATAGATCCTCAGACTCATGAACACCACTCTGACCCCAATG  
GACTGGTGAGAAGACCGGCTACATCATCTTTAGCTCGTCACTTGGCACAATGGGAAAGTGCTAGGCTCGAAGCTGAGGCT  
CGTCTGTCAAGAGAGTCTCAATTTTTGGTTCCGTCTCATGTTGGGAGGTCTGAGACCGACTATTTTTTGGCATATGGAA  
CTCAGAGATAGGAGAGTCATTTTCGTAAATTCAGAAAGGAGAAAAAAGCGCTTGTACAGTCCAGCCTCTCAAGCGTCTT  
CGTGTACAAAGTATGGATCAGCTTCAGGCATTACGACTGAGGTTGAGATCGGTGTTGCTGGTTCCAGGTGACAGGGAGC  
AACCAAAATGAATGTATGGAGTGGAAGATTGGCCAACCATATACTGAAGATTTCTTGCAAGGAGCAGATACCTGTAGCTC  
CAATGCCATGGATGAGGATTCATCCGAATCAGCATTGCAACTCTTTTTGGATTTCCCTAGTAACAATGACATGAGCTTTC  
TAGGACATAGTGATTCCTATAGCTGTACCCCTTTTTGAGTGAAAGCTATTGA

>CcMYB74 |Locus\_ID=BC332\_00519 |CDS\_len=834 |strand=-  
ATGGGAAGGCAACCTTGTTGTGACAACTAGGTGTGAAGAAAGGTCCATGGACAACAGAGGAAGACAAGAAACTCATCAA  
TTTTATTCTTACAAATGGCCAATGTTGTTGGCGTGCTGTCCCTAAACTTGCCGGTCTTCGGCGTTGTGGTAAGAGTTGTC

GTCTTCGATGGACTAATTACCTTCGACCCGACTTGAAACGCGGACTTCTTAGTGATGCTGAGGAGAAAATGGTCATTGAT  
CTTCATGCTCGTCTTGGAACAGGTGGTCCAAGATTGCTGCAAGATTACCGGGAAGGACCGATAATGAGATAAAAAATCA  
TTGGAACACACATATTAAGAAAAAGCTTCTCAAAATGGGGATTGATCCTGTTACACACGAACCACTAATCAAAGAGGAAA  
ATCCAAC TGATCAACCTATCCAAGAATCTGATCAAAATAAAAAATAATGATCATCAGCAGGTAGTGGTTGTAACAGCAGGA  
GCCACTTCTTCAGAAATTAGATAACTCTTCTACCTCATCTTCTTCTGCTTCTTCGTCTGAAAACCTTTGTAACGAATCCAA  
ACTTGTCTTGACACGTTTAAAGAAAATGATCCGCTGCTAAGCTGTCTACTTGAGGCCGATGATGCTCCTCCTCATCG  
ATTCGTCCTGGGAACCTCCAGTAAAAAGTTTCGATAACAACAACAACATGACATCGTCGTGGGACGACGAAAGTTTCAAT  
TGGCTATTTGATTGTCAAGATTTCTGGGATCCATGACTTTGGTTTTGATAATTGCTTCAATGATGTGAATTGGAGGTCTT  
TAACACCATATATGACATGGAAAACAAGAAGTGA

>CcMYB75 |Locus\_ID=BC332\_12501 |CDS\_len=960 |strand=-  
ATGGGAAGACAACCTTGTGTGACAAAAATGGTGTGAAAAAGGTCCATGGTCAAGTGAAGAAGACAAGAAAACCTATTAA  
TTTCATCCTTAACAATGGCCAATGTTGTTGGAGATCTCTCCAAAACCTGCAGGTTTATTGAGATGTGGAAAGAGTTGTA  
GATTGAGATGGACAAATTATCTAAGACCAGATGTAAAAAGGGGACTTTTATCAGAATATGAAGAAAAAATGGTTATCGAT  
CTTCATGCTCAACTTGGAATAGATGGTCTAAAATCGCGTCTCATCTGCCGGAAGAAGTGAATAATGAAATCAAGAATCA  
CTGGAATACACATATTAAGAAGAAGCTCAAGAAAATGGGGATTGATCCAATCACTCACAAGCCAATTACTAGTGACCAAC  
CAACATATGATCAACCAATCATTCAACAAGAAAAACAACATTAATTGCGCTCCGTCTCAAACAGATTTGAATCGTCAA  
GGGAATGAGAACTGGGACATGTCCAAAAATATCAAGACGACAACAACAGCAACAACAACAACAGTAGCTATGCCTTC  
GTCTGAGACAAATTTGGATCGTCAAGAAAACAAGAACGTTGGAACATGTCCAAGACATATCAAGACGACGACAACAACA  
CAACAGTAGTTACGCCTCAGTCTGAGACAAATTTGGATCGTCAAAAAGTCCCTTTAATTCCACCAACTGAAATTTTAATC  
CCTTATGAATCAACAACCTTCATCAACATCTTCATTTTCTCACAATCATCCAATATGATCCTTGAAGACTTGAAATTTT  
GCCAAATTTTGATAATTGGCAAAGTGATTTCAACATGGAAATTAATTGGACAAATGATGATTTTAGTAGCACTTTGGATT  
ATTTACTCAATGATGATGATATTAGTGACATGAACAACACCACCTTTCCAAGATTGGTCACAAGTGTGGAAGTTTGA

>CcMYB76 |Locus\_ID=BC332\_29469 |CDS\_len=912 |strand=+  
ATGGGGAGACAACCTTGTGTGACAAAGTTGGATTGAAGAAAGGTCCATGGACAAGTGAAGAAGACAAGAAAACCTATTCA  
CTTCATTCTTAACAATGGCCAATGTTGTTGGAGAGCTGTCCCTAACTTGCAGGGCTATTAAGGTGTGGAAAGAGTTGTA  
GATTAAGATGGACAAATTATTTAAGACCAGATTTAAGAGAGGACTTTTATCAGAATATGAAGAAAAAATGGTTATTGAT  
CTTCATGCTCAACTTGGAATAGGTGGTCAAAGATTGCTTCTCATTTGCCTGGAAGAACCGATAATGAAATCAAGAATCA  
CTGGAACACGCATATCAAGAAGAAGTTGAAGAAAATGGGGATTGATCCAGTCACTCACAAGTCACTTTCCACTATTACAA  
ATGATCAAACAAACATATTAGAACAAGAAAATCAACCAATTCAACAAGAAAAAGTTGAAGATCAATCAACTATGATAGAG  
ATCAAAGCAGAAGACGACAACAACAACAGCAACAACAACAACAGTAATAATGATAATAACACAATGGAGACGAGTTGCGC  
GAATAATTTTAACTCAACTATAGTGGAAGTCAACAATAATGGCTTTGGTATAGATGAAGTTCCATTGATTGAACCTCATG  
AGATGTTAGTTCAAGAATTATCATCAACGCCATCAACATCATCATCATCATCATTTTTCATCATCATCGTCATCCAAC  
ATTCTTGAAGATTTGAAGTTTTTGCCAAGCTTTGATGAATGGCCATTAATGGAAAATAACAACATGGGATTTGGATGGGA  
AATTAACAATGATTTCACTAGCACATTGGATTTCTTGCTTGAGGATGATCATAGTGACATGATGAATAATGTCACATTTG  
ATGAATCTTGGAAGTTTGAGCAACTCTTGTA

>CcMYB77 |Locus\_ID=BC332\_06135 |CDS\_len=768 |strand=-  
ATGGGAAGGCAGCCTTGTGTGATAGAGTTGGATTGAAGAGAGGTCCATGGACTATTGAAGAAGACCACAAGCTAGTTCA  
TTTTATTCTCAGTAATGGCATTCAAGTGTGGCGAACCCTTCCCAAGCTTGCAGGGTTGCAAAGATGCGGCAAAAGTTGTA  
GATTGAGATGGATTAATTATCTGAGACCTGACCTCAAAGAGGGGCGCTATCTGAAGCTGAAGAGGATCAGATTATACAA  
CTCCATGCTCGTCTTGTTAACAGGTGGTCTAAGATAGCATATACCTTTCCGGGAGGACAGATAACGAGATCAAGAACCA  
TTGGAACACTCGGATTAAAGAAGAGATTACAGCTTATGGGAATAGACCTTTAACTCACCAGCCAATTGACATGGAAAAAT  
ATCAACATGAACCTGATCAAACAGAGAAATGTGATAAAAGAAACGAACCAAGAGAAGTTCATTGAAAAATACTAATGATGTT  
TCACTACCAAACAATCCACACCACAATATGTTGAGTGACAGTTTTAATGTGGACTTATGGAACAAAAGTGGTAACACTAT  
GTCCACTTGTATAGCCCTTCAATTTCTTTGGAGGCTGAAGAATCTATCAACTTGTCAACAACAACATCAGCTGCTACTG  
AATCATCAAGTAATGTAGCTGCACTCACAGAAGAACAAGATTCTCTACAGCAATGGATGGATTCAATTTTCTCATGTGCG  
GTCAATCAACTAGAAGAAGACCTCATCTTTTGGAGAAATACAATTAA

>CcMYB78 |Locus\_ID=BC332\_28218 |CDS\_len=675 |strand=+  
ATGGGAAGACAACCTTGTGTGACAAGATAGGATTGAAAAGAGGTCTTGGAATTTGAAGAAGATCATAAGCTTATGAA  
CTTCATTCTCAACAATGGTATACAATGTTGGCGTCTTGTAACAAAATTAGCAGGGCTAATGAGATGTGGGAAGAGCTGTA  
GATTAAGATGGATAAATTATCTGAGGCCAGACCTCAAAGAGGAGCACTCACTGAAGCAGAGGAAGATATAATCATTAAG  
CTTCATTCTCATCTTGGAATAGGTGGTCGAAAATAGCAGCGCATTTTCCAGGACGTACAGACAATGAGATCAAGAATCA  
TTGGAATACAAGGATTAAGAAAGAGCTAAAATTTCTTGGCATAGACCCTCTAACTCACAAGCCCATTGAACAGAATGATG  
ATATTAAGCAACAAGTTTCTGTAGAGATTGATGAGAATGTGAAGGAAGTACAGAAAAAACCTTAGATTATCCACGAGAG  
CAGCAAAATATTCAAATTTCAACATCTAGTTCCAGCTTAAATGAGAGTTTGGATATGGGGTCATCAAGTGAAATATTCCA  
AAATTCACACACATTGGACATGTATAATCCAGGAGTTGAAGATCCTTTCCAGAATTGGATAGGTAGTCCAATACATTGGG  
ATCTTTTCGACAACCTAGAAGACAATTTTCTATGA

>CcMYB79 |Locus\_ID=BC332\_10962 |CDS\_len=1044 |strand=-

ATGGGGAGGTCACCTTGTTGTGATGAAAATGGGCTGAAAAAGGACCATGGACTCCTGAAGAAGATCAAAAACTTGTTGA  
TTATATTGACAAACATGGTCATGGCAGTTGGAGAGCCCTTCCTAAGCTTTCAGGACTTAATAGGTGTGGCAAGAGCTGCA  
GGTTAAGATGGACTAATTATTTGAGGCCTGATATCAAGAGAGGCCAAATTCTCTGAAGAAGAAGAACAAACAATTCTTCAT  
CTCCATTCCATCCTAGGAAACAAATGGTCCGCAATCGCGACACACTTACCGGGAAGAACAGACAACGAGATAAAGAATTT  
TTGGAACACACATCTAAAGAAGAAGCTAATTCAAATGGGATATGATCCAATGACTCACAGGCCAAGAAGCTGATTTATTTG  
CAAGCTTGCCTAATATAATAGCTTTGGCAAATTTACTTCAGCATCATCCACTTGAAGATCAAGCTATAAGATTACAAGCA  
GAAGCTGCCCAAATAGCTAAGATTCAGTACTTACAATTTCTATTACAATCTTCAAATAATAATTATAATCCAATACCACC  
TACTACCTCATCAAACACTCAATATTACAATAATCTTGGAGATATTGGGGCATTTAATTTGACAAATTTTGTAAAGAAA  
ATAGTACTACCCCTTCTTTAAATTTATCCAATCTTGAAGTCAAACACTTTTCTCCAATGAACTGGCTCTCACTACTC  
CACAATCCAGATAACACACAACAAGTCCCTTTCAATTTCCAAACACATTTGAATAATAACAATAATAATGATATGAGTGA  
TATTGATGGTAACAATTTTAAATTTTATCTAGAGATAATTACCAAGTTCCTTGAATAATACTATTATTCCTCTC  
CACCTTCTTCAAGCCATTTGCCACATTTGACTGAAATTTCCATCAGCAATAATAATCAAGGAGATTCCAGTTGCAATTCC  
TCTAACAAATGTTGCTGATCAAGGGACTTCTTCTCATATTGGCCAGAGCTGTTTTTTGAAGAACACTTCATGCATGACAT  
TTGA

>CcMYB8 |Locus\_ID=BC332\_08524 |CDS\_len=747 |strand=-  
ATGTGTAGCAGAGGGCATTGGAGGCCTCATGAAGATGAGAACTGAAAGAGTTAGTTGCTAAATATGGACCTCATAACTG  
GAACGCTATTGCAGAAAACCTGCAAGGCAGATCAGGGAAGAGTTGTAGGTTGAGATGGTACAATCAATTGGATCCAAGAA  
TCAACAGAAGCCCATTCACAGAAGAGGAAGAAGAAAGACTTCTTCTCACATAGAATTCATGGAAATCGTTGGGCTATG  
ATAGCTAGACTATTTCCAGGTCTGACTGATAATGCTGTGAAAAATCATTGGCATGTTATTATGTCCAGAAGATGCAGAGA  
AAGATCTAAGATTTATTCCAATAGAGCTTCTGCTGCTGCTGCTGCTCAAAAATCAACAGACCAACAAGACAATATTAATA  
ATATCCAAGATATGATGATCAGAAAAAGAAGTTCCAACAATTTTATTGACCATCAACAGTTATTAGAAAGATATAGTAAT  
TGTTACCAATTCAGTAGCTATGATCACAATTCCTTTTATCCAACAGAGTTTCATTTCAACCACCTACCTCGGCATTTCAA  
GATGGATAATCAAGAGAAGAATGAAGAAGTGAAGTGAATGCTATGATTTTTTACAAGTGAATAATACTGCAGGCTCAAACAAA  
GTGAAGTGATAGATCAAGAAGTTGAACAGAAACGTGATATTTCTCTCAAAGTAAAAAAGCTCCAGTGAGATTTATAGAT  
TTCCTATCAGTTGGAGACTCGTCCTAA

>CcMYB80 |Locus\_ID=BC332\_13875 |CDS\_len=1056 |strand=+  
ATGGGAAGGTCTCCTTGTTGTGATGAGAGTGGTCTAAAGAAAGGTCCATGGACTCCTGAAGAAGATCAAAAACTCACCAA  
TTATATCAATAAAAAATGGACATGGCAGCTGGAGGGCCCTCCCTAAACATGCAGGTCTTAATAGATGTGGAAAGAGTTGCA  
GATTGAGATGGAGTAATTATCTTAGGCCAGATATTAAGAGAGGCCAAATTCTCTCAAGAAGAGGAACAAACAATTCTCAAT  
CTCCATGCTGTCTTGTAACAAGTGGTCAGCAATTGCAACTCATCTACCAGGGAGAAGTGAACATGAAATCAAGAATTT  
TTGGAACACTCATTTGAAGAAGAAGTTGATCCAAATGGGTTATGATCCAATGACTCATAGGCCTAGAAGTGAATCTTTA  
ATAGCTTGCAACATCTCATAGCTTTAGCAAATTTGAAGGAATTAATTGAACATAATCACTCATGGGAAGAACAAGTTATG  
AGACTTCATTACTTGCAAAATCTTCTACAACAACCTCACAACAATAATATTAGTACCTTAAGTGCTATCCAAAATGTGGA  
AGCTAATTACAATCTTTTAAATCTTTTAAAGATAGCCAATTCCTTAGACTCAAATAGTCATTTGGGAAATCACATAGTTC  
ATCAAATTCCTTCAAGTCTTGATCAACCTATTCAAATTCATCCCTTTCTCCCATTTGACTGAATTACACACCCCTTGT  
AGTTTCCAACTTCTTTGAACAAAGATAAGGTTCCACCTCAAGACATTGAGTTTACGGTTATGAGCCACGAAGAACTTC  
GCCTGCTTCTTGTGGCTCCCTCCTTTATCTCCTTCTCTTCTCCTCCTCCTCCACCGGTATCAAACAATCAAAGAAGAA  
AAGAAAACCTTTCAGAAGTGGTGATCTCATCTTGCTTGCCAGAAGATATGAAGGTTTTGGATAACTTTTTTCAACAAGAT  
AGCGAACAACTCACTCAGCAATGAAGGAGCTCCACCTTCTATTTGGTCTGACCTTCCACTTGAAGACTCTTTTTTCCAAGG  
TCTTGATAAAATTCTAA

>CcMYB81 |Locus\_ID=BC332\_00728 |CDS\_len=900 |strand=-  
ATGGGGAGATATCCATGTTTGCAAATTTGGAGAATGATTTGAAGAAGGGGCCATGGACAAGTGAAGAAGATGAAAAATTGGT  
GGAATATATTCAAGAAAATGGACATGGAAATTTGGCAATTAGTCCCTAAAAGAGCAGGATTAATAGGTGTGGGAAAAGTT  
GTAGATTAAGGTGGACTAATTATTTAAGGCCAGATATTAAGAGAGGAGCATTCTCTAATGAAGAAGAAGAAACAATTATC  
AACCTTCATTCTCTTCTTGGAACAAGTGGTCAAGAATTGCAGCTCGTCTTCCGGAAGAAGTGAACGAAATCAAGAA  
TTTGTGGAATACTCATCTCAAGAAAAAGCTTCTTAAATCTGGAATTGATCCAGTAACACATCAACCAATAACTGATCCAA  
ATTTACTTCTTAGCCTTTCTAATTTGATGAACCTTTTGAATCTGCTCTTAGGTTACAAGCAGAATTTACTGAAATAGCC  
AAAATTCATCTTATTCAAACATAATTCAAGTCTAAATACTCCCTAGCTCCATTAATTCATCTTTACAAGAAAATTA  
TCCCATGCAACAATTTTACAATAATATTCTTGACCATTTGACCAAATTTCTGCTAATGAACCTCTCCAATTTGGAAGA  
ATTTATCGGACAATATGGTCGTAAATTCGAGTATTTGGAGAATAATATGATTAATAATGGATATAGTAAAGTGTGTGAG  
GTTGATAATTCAGAATATTCATCACTTCCATCACTAGTTACAATTACACCTGAAAATTCAGTACCCTTTGATCAGAAGAT  
TGATATAATTAATCCAAGTTATGATGATTTTGAAGCATTGGAAAAAAGTCTGGATGATGACTTCTGGAAAGATATTAGTA  
GTACAATGCAATTTGTGTAG

>CcMYB82 |Locus\_ID=BC332\_00729 |CDS\_len=645 |strand=-  
ATGGGGAGGTATCCATGTTTTAAAGTTGATGAAGATTTAAAGAAAGGGCCATGGACACCAGATGAAGATAAGAAATTGAT  
GGATTATATTACAAACAATGGACATACAAATTTGGCAATTAATTCAAAAAAGCAGGTTTTAAACAGATGTGGAAAGAGTT  
GTAGATTAAGGTGGACTAATTATCTTAGGCCTGATATTAAGAGAGGAGCATTCTCCTTTGAAGAAGAAGAAATCATTATC  
AGCCTACATTCTATTCTTGGAACAAGTGGTCAAGAATTGCATCTCATCTTCCGGAAGAAGTGAATGAGATCAAAAA

CTTCTATAAACTCATTTAAGGAAAAAATTACTCAGATTGGGAATTGACCCCAGGACGCATAAGCCAATTTCTGACCTCA  
ATTTCCCTCATAAATCTTTCTCATCAATTTCTTCTAAACATAATCTTTTTATAAATAATCCCTTAGCATATGCTCTTAAA  
TTACAAGCACAAAGTCACAGAAATAGCCAACTTCAACAACCTTTACAAGACCTTTATGCACCCATAAATACAAATATTCC  
ATTATTGCCATCTAATTTTCAAGAAAATAATTTTGCTACAAGTTCAAGCCATGTTATAACAACAAATGTTAGTACCAACA  
CCCAC

>CcMYB83 |Locus\_ID=BC332\_19190 |CDS\_len=1014 |strand=+  
ATGGGAAGATCACCATGTTGTGATAAAAAATGGACTCAAGAAAGGTCCATGGACACCAGAAGAAGATAATAAACTCATCCA  
GTATATCCAGCTTCATGGTCTGGAAATTGGAGAACCCTCCCTAAGAATGCTGGACTTCAACGGTGTGGAAAGAGTTGTC  
GTCTTCGTTGGACGAATTACTTGAGACCGGATATTAAGAGAGGAAGATTCTCATTTGATGAAGAAGAACTATTATCCAA  
CTTCATAGTGTTCTTGGAACAAGTGGTCCGCTATAGCGGCTCGTCTTCCGGAAGAACAGACAACGAAATCAAGAATTA  
TTGGAACACTCACATTAGAAAAAGGCTTCTAAGAAATGGTATTGATCCAGTGACCCATAGTCCTCGTCTTGATTTATTAG  
ACTTATCATCCCTCCTAAATTGCACTCAATTCAACCTTTGAGCTTACTTGGACTACAAGCACTTATAAACCTGAAGTC  
TTTAGGCTTGCAACTACTCTGTTGGCATCACACAATGAAAGTTCCCCAGAATTGTTACTACAAAACTTCAAGAAAAATAA  
CCAAATGTTTAGCAACTCTCAGCTACAAAACCAAGAAGGTCTGAATTATTGTTACAGAACTTCAACAAAATCAATTAT  
TGAATGCCCAAGTGCAAAATCAACCTCAATTTTCCAATACCAAAATCAGATTCAAGAAATACCAAAATTTCAACCACCACA  
CAAAATGTTGCTTGTTCATCTTCATTATCACAGCCCATGCAATTATTAGGACACGTGGACGAATCCTATTTGATGAATGG  
CCAAATGCTCCCTCCACAAAATTATGGTTATTGTAATTCTGATGCTTCTGATAATTCAACTTTCCAATCACTCAACAACA  
ACAGCAGCAATCAGAACTCAGCCTAGATAATTCAAGTGTGTCGACGCCACTGAAGATGAAAAAGAGAGCTATTGCAGT  
AATTTGATGAAATTCGAAATTCAGAGAGTTTAAATTTGATGATTTTATGTAA

>CcMYB84 |Locus\_ID=BC332\_25152 |CDS\_len=990 |strand=+  
ATGGGAAGAACACCATGTTGTGATAAAAAATGGACTAAAGAAAGGTCCATGGACTCCAGAGGAAGATCAAAAACCTCATTCA  
ATACATTCAAGTTCATGGCCCTGGAAATTGGAGAAATCTTCCAAGAATGCTGGACTTCAAAGGTGTGGCAAGAGTTGTC  
GTCTTAGGTGGACAAATTATTTGAGGCCTGATATTAGAAGAGGAAGATTCTTTTTGAAGAAGAAGAACTATTATCCAA  
CTTCATAGTGTTCTTGGAACAAGTGGTCTAGCTATAGCAGAACGTTTACCAGGAAGAACGGACAACGAAATCAAGAATTA  
TTGGAACACACATATAAGAAAAAGATTGTTGAGAATGGGCATTGATCCGGTGACTCATAGCCCTCGTCTTGATTTCTTAG  
ACTTTTCATTACTTTTCAACTCGACTCAGCTTAATCTTTCAAGCTTGTGGGACTACAAGCACTCGTAAACCTGAAATC  
TTCAAACCTTGCAATTCATATTACTTTCCCAAACCTCATGAAATCAAGAATATCATTACAAAATCAAACTCTCAAGG  
GCCTGAACTCTTGCTACAAAACTTCAACAAAATCAATTATTGCATAATCAGTCCTCTATTTTCCAACATAATGATCAAT  
TGCACAACCAATTTCAAAAATACCAATTACACCCACAAAATGTTTCATCTTCATCTTCCAGTCCATACAAGGTAAC  
ATGGGGTCTTATTTGATGAATGGCCAAGCATTCCATGAAAATGTGATATCTCTTCAAACTATAGTTATTCTGCGTCTGA  
AGTATCTGAGAACTCAACGATTCAATCCTTAAACAACAATAACAACAACAATCAGAATAGTCAGAATTTCAATTTTG  
ATACACCTTTGTGAGGCACGGAAGAAGAGAAAGAAAGTTATTGCAGTAACCTCAATAGTTTCATGAAGTTTGAAATTTCA  
GAGAGTTTAGATTTTGATGATTTGTTGTAA

>CcMYB85 |Locus\_ID=BC332\_04760 |CDS\_len=1146 |strand=+  
ATGGGCAGAGCTCCTTGTTGTGACAAAAATGGACTTAAGAAAGGTCCATGGACACCAGAAGAAGATCAAAGGCTCATTGA  
TTACATTCAAAAACATGGTTATGGTAATTGGAGGACTCTTCTAAGAATGCTGGGCTTCAAAGGTGTGGAAAGAGTTGCA  
GGCTTCGTTGGACCAACTATCTAAGGCCAGATATTAAGGGGGGAGGTTCTCTTTTGAAGAAGAAGAGACTATCATTCAA  
CTCCATAGTATTTTAGGAAACAAGTGGTCTGCTATTGCTGCACGGTTGCCCGGTAGAAGTATAATGAAATTAAGAACTA  
CTGGAATACGCATATAAGAAAAAGGCTTTTGAAGTGGGAATTGATCCAGTGACTCACAGTCCACGCCTTGATCTTCTTG  
ATCTTTCTCCATTTTAAACCTTCATTTTACAATAACTCATCATCTCTTTCATCAAATGAATCTTTCAAGATTGTTAGGC  
CATGTTCAACCTTTGGTAAATCCTGAAGTCTTAGATTAGTACTTCTCTTTTATCATCCCAACGCCAAAACACAAATAA  
CAGCTTCAATGATCCCAAATAATCATCAAGAAAAATCAATTTGCCAAAACCAATTGCCACAAATGGTCCAAAATAGCCAAA  
TTCAAGCCCTATTCAAGATTATCCAACCTTGACAACCTTAAAGTACAACCCCATGTGTTCCATTTTCTAGTCATGAAGCT  
CAACTCATGCAGCCACCAACAACAATATGGAGGGCTTCTCATCAAACTTGAAAATTTAGTAAGTCAACAAGTTGCCA  
AGTTAATGATGAGTGGCAATTAAGCAATGGGATGCCTACTTCAAATTTAACGGATGATTATTTTCTTTACAAAATTATG  
GTTACTATGATCCTCTACCGTCCGATGGCTCAACATTAATTCAATCCAACGACAGCAACAACAACAACCTTCAAGCTT  
CAATCAACTGTTTTGTGCAATTTATCGACACCTTCATCGAGTCTACACCATTGGATTCAAACCTTACTTACTTCAACAA  
TAGCAGCAGCACAACCTGAAGATGAAAGAGATAGCTACTGCAGCAACATGTTGAAGTTTGATAATATTCAAATATTT  
GGGATACTACTAATGAATTTATGTAA

>CcMYB86 |Locus\_ID=BC332\_25248 |CDS\_len=966 |strand=+  
ATGGGAAGAACACCTTGTTGTGACAAAAATGGACTTAAGAAAGGGCCATGGACCACAGAAGAAGATCAAAGGCTCATTGA  
TTACATACAAAACATGGCTCTGGAAATTGGAGGACTCTTCCAAGAATGCTGGTCTTCAAAGGTGTGGAAAAAGTTGCA  
GGCTACGTTGGACTAACTATCTAAGGCCAGATATTAAGAGAGGAAATTTCTTTTTGAGGAAGAGGAAACAATCATCCAC  
TTGCATAGTATTCTTGGAACAAGTGGTCTGCCATTGCTGGTCTGTTGCTGGAAGGACTGATAATGAAATCAAGAAGTAA  
TTGGAATACTCGCATTCGGAACAACTTATGAGGATGGGAATTGATCCAGTGACTCATAGTCCTCGTCTTGATCTTCTTG  
ATTTAACTCAATTTTCAACCTTCAATCTACAATTCATGTCAAGTGATCAATAATAATCTTTCAAGATTATTAGGTGTA  
CAATCCCTAGTAAATCCTGAGCTTTTGAATTAGCCAATTCGCTCTTATCTTCAACCACCAAAACCAAAATTTCTTGTT  
GGGAAGTAATTTTCAAGAAAATCAACCATTCAATTTCCATGTCCAAAACCAATTGACCTCATTATGCCAAGCTAACCAAA

TTCAAAACCCTATTCAAATACTTCTACCTGCTCCGATTTAAATATTCAATCTGTTCCATTTTATAGTGACACTCAGGTC  
ATGCAACAACCAAATGTGGAGCAATTATCCTCAAATGTTTCAACCTTTAGCTCGAAAATAGCCAACAAAATGAGTGGAA  
AAATTTACCTTCGATTCTGCTTTGCCAAATTTATCAACACCCTCATCAAGTCCTACATCATTGAATTCGAATTCAGCA  
CAACTTCTGAAGAAGAGAGAGAAAGTTATTGTAGTATGTTGAACCTTTGATATTCCAAATATTTTGGATGTTAATGAACCTT  
TTGTAA

>CcMYB87 |Locus\_ID=BC332\_06008 |CDS\_len=1248 |strand=-  
ATGGGTCGATCTCCGTGCTGTGATAAAGTTGGGCTGAAAAAGGACCTTGGACACCTGAAGAAGATCAAAAACTCTTAGC  
TTATATTGAAGAACATGGTCATGGTAGCTGGCGTGCATTACCTGCCAAAGCTGGACTTCAAAGATGTGGAAAGAGTTGTA  
GGCTCAGGTGGACTAATTACCTAAGGCCTGATATCAAGAGAGGAAAAATTTACTTTACAAGAAGAACAAACCATCATTCAA  
CTCCATGCTCTCTTAGGGAATAGGTGGTCCGCCATAGCCACTCATTTACCCAAACGAACAGATAACGAGATCAAGAATTA  
TTGGAATACGCATCTTAAGAAGCGGCTAGTAAAAATGGGCATTGACCCGGTGACCCACAAGCCCCAAAACGATGCACTGT  
TGTCCTCATGACGGTCAGTCCAAGAACGCGGCTAACCTTAGCCACATGGCTCAGTGGGAAAGTGCTCGGCTCGAAGCTGAA  
GCTAGACTCGCTAGACAATCGAAGCTCAGGTCCAGTAGTTTCCATAGTTCAATCACTTCTCAAGAATTTACTGCTCCTTC  
ACCTTCTAGTCCTCTTAGTAAACCGGTCTGTGGGCCCAACACGTTGTCTAGACGTGCTGAAAGCCTGGAACGGTGTGTTGGA  
CCAAACCAATGAATGATGTTTCTGTGCGCAATGCTAGTGTGTTTCACTGCTGGCCTCGCAAGGGACTTGGAATCC  
CCTACTTCTACACTAGGCTATTTGAAAATGCTCAACATATTTCCACATCAGGAATTGGAGGAAATTCACTATTCTGTA  
TGAATTTGTTGGCAATTCATCAGGGTCTAGTGAAGGTGGAATTATGAACAATGAAGAAAGTGAAGAAGATTGGAAGGGAT  
TTGGAAACTCATCAACTGGACATTTGCCTGAATACAACAAAGATGGGATTAATGAAAATTCACCTTTCATTACATCAGGA  
CTACAAGATTTGACCCTACCAATGGACACAACATGGACAGCAGAGTCTCTAAGGTCAAATACAGATCAAATTTCCCCTGC  
CAATTTTGTGAGACATTTACTGATCTCTTGCTTAGCAATTCAGGCGATGGTGATTTGTCCGAAGGCGGTGGCAGGGAGT  
CCGATAACGGAGGGGAAGGTAGTGGCAGTGGAATGCTAGTGAGAACTGTGAAGATAACAAGAATTACTGGAATAGTATT  
TTAACTTAGTCAATAATCCTTCCCCATCTGATTAGCTATGTTCTGA

>CcMYB89 |Locus\_ID=BC332\_01852 |CDS\_len=1008 |strand=+  
ATGGGAAGGTCACCTTGTGTGAGAAAGTGGGATTAAAGAAAGGGCCATGGACTCCTCAAGAAGACCAAAAACTGACGTA  
TTACATTGAAAAACATGGCTGTGGTAGCTGGCGTGCTTTACCAACAAAAGCTGGACTTAAGAGGTGTGGAAAGAGCTGCA  
GACTAAGATGGATAAATTATCTAAGACCTGATATTAAGAGAGGAAAATTCAGTTTGCAAGAAGAACAACGATCATTCAA  
CTCCATGCTCTTCTGGGTAACAGATGGTCAGCTATAGCAACTCATTTGGCTAACAGAACAGACAATGAAATCAAGAATTA  
TTGGAACACTCATTTAAAGAAGAGATTAACCAAGATGGGAATTGATCCAAATACTCATAAACCAAGATCCAATTTTGGTT  
CTGCAAACCTAAGTCACATGGCTCAGTGGGAAAATGCTCGGCTTGAAGCTGAAGCTCGACTTGTTTCGCGAGTCCAAGAAA  
CAACAAGAAGAAATTATTTTGATTAACAACAACATTAATAATTATAATAATATCCACTTCGGTACTAATAATTTGGGTAC  
TAAAAATGTTTTACTACCCCTTCAAACAAAATTACCATCACTACCCTGTCTTGACGTGCTAAAAGCATGGGAAGGAGGGG  
CAAATTGGTCAAATAGGCCAAAAATCAAAAAAGAAAAATTTTTCGATAATTTTCCAAATCCTCCACAAGCTTATCAAAC  
AACAACTTGTTACTTATGGTACCAAGTAACAACAACAATAATAATATTTTGGGAGCTGGATTAGTCAACACGTGTTT  
GGTTGGTGCAGGAAGTTTCTTGGGGAATAATATTAATGAAATTTATCCTATTCTAGTTATCCATGTTTGAATGATATTC  
AAGGGTTCACACAATTGGAAGCGTTGTTGGAAGCTGCCAAGATGACTACGACAACAATGACAACAATTATTGGAATACT  
ATATTAAATCTTGTACTTCACTTGCTGATGGTTCACCAAGTGTGTTAA

>CcMYB9 |Locus\_ID=BC332\_26517 |CDS\_len=1035 |strand=+  
ATGAACTTTTTAGTCCCTTGTGTTGAACAAAGTCCTTGGAGTTTTAATCATGAAGAAAATTTACGGAAGTTGAAAGATGA  
AATAGAGGAAGAAAATTTAGTGGATATGAAGAAAAATAATAATAATAATGGAGGAACAAAGATATGTGTTAGAGGAC  
ATTGGAGACCACATGAAGATTCAAACTTAGAGAATCTGTTGCTCAATATGGTCCACAAAATTTGGAATCTCATTGCTGAA  
AAACTTGATGGAAGATCAGGAAAAAGTTGTAGATTGAGATGGTTTTAATCAGCTAGATCCAAGGATCAACAGAATTGGCATT  
TTCAGAGGAAGAAGAAGAAAGACTATTAACGACACAAAAATGTATGGCAACAAATGGTCAATGATAGCTAGGCTATTCC  
CAGGGAGGACAGACAATGCAGTCAAGAATCATTGGCATGTATAATGGCAAGAAAACATAGAGAACAAAACAGTGTGTAT  
AGAAGAAGAAAGAGTACTTCATCAAATTTGCAACAAATTATTGCTCCTAATAATAATAATAATGATAGTATCATCCAAAT  
TAAGAGCAATAATATGCAAAGTGATTTAACAATTTCTAGCAACAATTGCAACAACAACAACATTATTGTTGATGATCATC  
AGTCAGCTTCAACTTGCACTGATCTTTCCTTACTCCCTCTTCTCTAAACCCATGTTTCCTCCTTTTCTCATGACAAGA  
TTTACACATCATCATCATGTGGAGCATCAAGGATTTCTTGATTCTAACAAGGCATGTTGTCAAGAGATGAACAAGAGGT  
GAAAATGGACCAAAAATCTTGTACGGAAAAGAGCCTATTGAGAGTTACCATCATCATATAATCATCAACATTATGGAT  
GTGGTAATGTGTCAGATACAAATTCAGAAATTTCTGCATCAGAATCAGTAGCCAACAACATGACCAATGTCAAGATTTAT  
GGTCATCAAATGAAGAAGAACAGATATAAAAATCTTCCCTTCATTGATTTTCTTGGAGTTGGAGCCACTTGA

>CcMYB90 |Locus\_ID=BC332\_27735 |CDS\_len=549 |strand=+  
ATGGGAAGGTCCAAATGTTGTGATAAAGAGGGATTGAAGAAAGGGCCATGGACACATGATGAGGACCAAAAACTATTGTC  
TTTCATTGAGAAACATGGTTGTGGTAGCTGGCGTTCTTTGCTGCTAAAGCTGGTCTGCAGAGATGTGGGAAGAGTTGTA  
GACTAAGATGGACAACTATCTAAGGCCTGATATTAAGAGAGGAAAATTCAGTTTACAAGAAGAAAGAAGCATCATTAC  
CTTCATGCTCTTCTTGGAAACAGATGGTCAGCAATAGCAACTTACTTGCCAAGAAGGACAGACAACGAGATAAAGAATA  
TTGGAACCTCACGTTTGAAGAAGAGATTAACCAAAATGGGAATTGATCCAATGACTCACAAACCAAAAATCACAAACAACC  
TTAATGGTGTAGCCTCATCAAATATGTTGCAATCTTAGTCACATGGCTGAATGGGAAAGTGCAAGACTAGAAGCAGAA  
GCTAGACTTGTTCAAAAATCAAAGACTCAAAAATCCTCTTCAATAACAACAAGTGTCAACAACATTAA

>CcMYB91 |Locus\_ID=BC332\_27736 |CDS\_len=1038 |strand=-  
ATGGGAAAGTCCAAATGTAGTGATAAAGAGGGATTAAAAAAGGTCCATGGACTGCTGAAGAAGATCAAAAGCTTTTGTC  
TTTCATTGACAAACATGGCTGTGGTAGCTGGCGTGCTTTGCCTGCTAAAGCTGGTCTGCAAAGATGTGGAAAGAGTTGTA  
GACTAAGATGGATAAATTATCTAAGGCCTGATTAAGAGAGGAAAATTCAAGTTTACAAGAAGAAAGAACCATCATTCAC  
CTTCATGCTCTTCTTGAAATAGATGGTCAGCAATAGCAACTTACTTACCAAGCAGAACAGACAACGAGATAAAGAATA  
TTGGAATCACGTTTGAAGAAGAGATTAACTAAAATGGGAATTGATCCAATGACTCACAAACCAAAAGTCACAAACAACC  
TTAATGGTGTAGCCTCATCAAAATATGTTGCAACTCTTAGTCACATGGCTGAATGGGAAAGTGCAAGACTGGAAGCAGAA  
GCTAGACTTGTTCGTAAATCAAAAGACTATGAAATCCTCTTCAATAACAACAATTACAACATTAACCGTAGTACTATTTT  
CCAACAATTACCTTATTATCAACTCCCTTGTCTAGACATATTAAGCATGGCAAATGTCTAGCACAAAATTACCAACAA  
TAAATGACATTAGTGCCATTCTTCTTAATAATTCGAGGAACAACCTCGAATCATCGATACCCCTCAACGTTACATTCC  
TCTGAGACTTTTATTCGTGAACAATAATGTACTACTACTACTACAAATGTTCTGTGATGATCATCAAATTCCTCC  
TAATTTATCTACAATCGAGTCGTGTTTTGAAGATGATCAACTCCAACAGATCTTCCAAGTTTCATGCAGGAGTTTTTCGG  
GGCTATTTCCAGAATATTATACACAAAATTCAACAAATATACAAGTGGATAATTTGATGGGAAGCTGTTCTGGAGATTTT  
GAAGATAACAAGTTAATTAATTGGAACAATTCCTAATTATTTGGTTAATTCACCTATTGGTTCTCCAGTATTCTGA

>CcMYB92 |Locus\_ID=BC332\_03833 |CDS\_len=993 |strand=+  
ATGGGTAGACTCCCTTGCTGTGATAAAGTAGGGGTGAAGAAAGGACCATGGACTCCTGAAGAAGATATAATGTTGGTCTC  
TTATGTGCAAGAACATGGTCCAGGGAATTGGAGGGCAGTCCCACTAAAACAGGATTGCGCAGGTGTAGCAAGAGCTGCA  
GATTAAGATGGACAACTACCTGAGGCCAGGGATAAAAAGGGTAACCTCACAGATCAAGAAGAGAAAACGATTATCCAG  
CTCCAAGCTCTTTTTGGAACAAATGGGCTGCAATAGCTTCATATCTGCCGAGAGAACAGACAACGACATAAAAACTA  
CTGGAATACTCATCTAAAGAAAAAGCTGAAAAAGTTTCAATTAGATCAATGCTCTGGATCAGATGATCATCTATTCTATG  
TAGAAAATGGTCTTACTCATTTATCATCATCAAATTCAGGGGGCAATGGGAAAGGACACTTCAAATGATATAAACATG  
GCCAAAAGGCTTTACATAATGCCTTGTCACTTGAAGAACTCAACAAGCCCACTCATTAAATATTAACAAGAAAATCCACA  
AGTTTCTTCTTCTACCTATGCATCAAGTACTGAAAATATATCTAGATTGCTACAAGGATGGATGAGATCATCAACTTCTG  
AGAATTCAAAACTTCATCTAACAACTTGAACAATGATTCATCTTCATGTGATGGGACACCAAATGCAGAAAGCAAA  
GGTGAATGGGGTTAATGGAAGCCTTCGAATCACTTTTTGGTTTAGAGTCATTTGAATCATCAAGTTTCAGATGAGTTCTC  
TCAAACAACATCCCCCAGGCTGAAGCTACTAAAGTTGAAATCAAGAAGGAAGAAAACGAAAATGTGGAAGCACCAGCTG  
TGCCACTGTCCATCATATTAGAGAATTGGCTACTTGATGAAAATACCCTCAATATTCAGCCAAAGATGACTTGACTACC  
TTCTCCTTTGATGAAACTGCTCCCTTTTCTAG

>CcMYB93 |Locus\_ID=BC332\_06027 |CDS\_len=915 |strand=-  
ATGGGTAGACCACCTTGTTGTGATAAACTAGGGGTGAAGAAAGGACCTGGACTCCTGAAGAAGATATTATGTTGGTCTC  
TTTTGTTCAAGAACATGGTCCAGGGAATTGGAGGACTGTTCCCACTCATACAGGGTTGCGCAGATGTAGCAAGAGCTGCA  
GGCTAAGATGGACTAACTATCTCAGACCAGGAATCAAGAGGGGTAGCTTCACTGATCAAGAGGAGAAAATGATTATCCAG  
CTTCAGGCACTTTTAGGCAACAAATGGGCTGCCATAGCTTCATATCTCCCGAGAGAACAGATAACGACATAAAAACTA  
TTGGAATACTCATTTAAAGAAGAAGCTGAAGAAGCTCGAAGCAAACGATTTATATTCAGCGATGGACACTGTTTATCAT  
CTATAAAGTCAGCTCCAGAGGCCAATGGGAAAGGACACTTCAAGCTGATATAAACACAGCCAAACAAGCTTTACAAAAT  
GCCTTGTCACTCGATAAATCAAGTCCAATTTCCGAATATACTATCAAGCCATAAATATTGACTGTTATCCCTCATACAT  
AAAACAAGAAGCGAAAATGTCTACTTCTACATACGCATCAAGTGTGAAAACATCGCGAAATTACTCAAACAATGGACTA  
GAAGTGATTCCACAAATAATTCTGAGCAATCAAGGCATCGTCGAGTACTCAATTCTCTTGTAATACTACTAACAATACT  
AATGCCATGACGGAATATTCATCATCATTTGAGTCATTTGAACCATCAAATTCAGATCAATTTTCTCAGGCTACGACACC  
TGAGGCTGCTGGTAAATTTTATGGTGAAAGCAAGAGAGAATTGGATGATGAAGTACCATTGTGAGTAATGCTGGAGAGTT  
GGCTGTTTGATGAAAATGACAATTTATTAATTTAG

>CcMYB94 |Locus\_ID=BC332\_26534 |CDS\_len=1059 |strand=+  
ATGAATGAATTAATTAATAAACCATCTTCTTCTTCTTTTCTTCTTCCAATCACCTCCCTTTATTTAAACACCTATCTAT  
ATGTGCCTCCTCATTTTCACTTTCTATACATACATCAAAAACACTTCACACAAAAACAACAACAACAACAACA  
CACCCCCCCCCCCCCNNNNNNNNNNCAACAACTATGGGGAGGCCTCCTTGTTGTGATAAAATAGGGATCAAGAAAGGT  
CCTTGGACTCCTGAAGAAGATATCATTTTAGTCTCTTATATACAAGAACATGGTCCTGAAATTTGGAGATCAGTCCCTAC  
TAATACTGGGTTGATGAGATGCAGCAAAAGTTGTAGGCTAAGGTGGACAAATTACTTGAGGCCAGGAATCAAAAGGGGGA  
ATTTCACTCCACATGAAGAAGGAATGATTATCCATCTTCAAGCTTTATTGGGTAACAAATGGGCAGCCATAGCTTCATAT  
CTACCACAAAGGACAGACAATGACATCAAGAATTATTGGAATACTCATCTAAAGAAGAACTCAAGAACTCCAAACAGA  
ATTGGATTCACATAATTTGGCTCCTCTTCTTCTAATAATAATAATAATAATTAATTATGATAATCATCATCAATTCT  
CATGGCAATTAAGTGTCAATAATAATGATAAGCAAGGGATCTCATCAAATTTCTCATCATCATCATTGTATGCTTCAAGT  
ACAGAAAATATTTCAAGACTTTTGAAGGTTGGATGAGATCTTCCCTAATAATCCTTCTAGAAGAAACAATATTGATCA  
TGACCATGATGATGAGATGTTGCATGTGGCACAAAAAATGATCAAGATCAAGAAATTGTTAAGAGTACTTGTGAGGAAA  
ATGAAAATTTCTGGATTATTTCAAAAGAGAAATCAAGTAATTGTGAGAGCAATGGAGTTGTTGTTGTTGATCATGGAAAG  
ACAAGTCCACCTCCATTACATATCTTGAGAAGTGGCTACTAGAAGAAAATGGTGGTCAAGTTGAAGAACTCATGGAAC  
TCCTATGATATTCACATGA

>CcMYB95 |Locus\_ID=BC332\_09091 |CDS\_len=1005 |strand=-

ATGGGAAGGCCACCTTGCTGTGATAAAATTGGTGTAAAAAAGGACCATGGACACCAGAAGAAGATATCATCTTGTTTC  
ATACATTCAACAACATGGTCCTGGTAACTGGAGAGCTGTCCCTGGTAATACTGGTTTGCTTAGATGCAGCAAAAGCTGTA  
GGCTCAGATGGACTAATTATCTCCGGCCTGGAATTAACGTGGTAACTTCACTGAACATGAAGAGAAAATGATTATCCAC  
CTCCAAGCTCTTCTTGGAACAGATGGGCAGCGATAGCTTCGTATCTTCCCCAAAGGACGGACAACGATATAAAGAACTA  
CTGGAATACTCATCTGAGGAAAAAGCTGAAGAAGATTCAAGGAAACGATGAAAATAGTACTGGTCAAGAAGGAGCAACCT  
CATCATCATCTCAATCAAATTTCTATAAAGGGACAGTGGGAAAGGAGGCTTCAAACAGACATCCACATGGCTAAAAAAGCC  
CTTGTTGAAGCTTTGTCACTTGACAAATCTGATTCCCTGGCTAATCCAATTAGCCCAGTTCTAGCTCAACAAACCGTTCC  
AGGGTCCAGTTCTTATGCATCCAGTGTGAAAACATTTCTAGGTTGCTTCAAATTGGATGAAAAATTTCCCCAAATCAT  
CTCAATTAAGTCGATCGAATTCGGAGACTACGCAAAGCTCGTTGAATAACCCGTCAATCGGGTCAGGTTCTGGGGTCAAGT  
TCGAGTCTAGCGAAGGTACCATAAGTGGTGAACGCCAGAGGGCTTCGACACCCTCTTCAGCGAAGGCAATGCTTTCAC  
GCCTGAAAATTTCCGGGATTTTTCAGGTAGAAAGCAAGCTGAATTTTCCGAATAGTAATTCGGAATGGAATTTTGTTC  
AAGAGGAGTCAACAAGCCCCGTTAACTTTGCTGGAGAAGTGGCTATTTGATGATGCTATTAATGCACCAACACAAGAAGAT  
GAGTTTATTGGGATGGACTTGGGTGAATCTGCTGGCTTTTTTTGA

>CcMYB96 |Locus\_ID=BC332\_33109 |CDS\_len=1113 |strand=-

ATGGGAAGGCCACCTTGTTGTGAAAAAACTGGGGTGA AAAAAGGACCATGGACACCAGAAGAAGATATCATTTTGTTTC  
ATATATTCAAGAACATGGTCCTGGTAACTGGAGAAATATTCACACTAATACTGGTTTGCTAAGATGCAGCAAAAGTTGTA  
GACTCCGATGGACTAATTATCTGAGGCCAGGGATCAAACGTGGAACCTTTACTGAACATGAAGAGAAAATGATTATCCAC  
CTTCAAGCTCTTCTTGGAATAGATGGGCAGCCATAGCTTCATACCTTCCACAAAGAACCAGACAATGATATCAAGAATTA  
CTGGAACACTCATTTGAAAAAGAAGCTGAATAAGAAGGTTGAAAGCCATGGTAATGATGCTCATGATCATGAAAACAATC  
ATCAAGAGGGAGCATCAACATCATCATCATCTCAATCAAGAATCTCAAAGGTCAATGGGAAAGGAGGCTTCAAACA  
GACATTCACACTGCTAAACAAGCTCTTTGTGAGGCTTTATCACTTGACGCCTCTCAAATAAACTATTCCCATTAAATCC  
TGAACAACAACAACACCAGCAGTTCAAGCATCTATGACCTATGCATCAAGTGCTGAAAACATTGCTAAGCTGCTTCAAA  
ATTGGATGAAAAATTCACCCAATTCCACCTCTTCAAGTAGCTCGAAAATCACTCAACAAATGTCCTTGAACAACAATTTA  
TCAGTCGGTGCGCTTTGAGTTCTAGCCCTAGTGAAGGGACCGTAAACGTTGCACCCCCACAAGGTTTGGACTCGCTCTT  
TAGCTTCAATTCATCTAATAATTCCGATGTATCGCAGTCTGTGTCGATCGATGAGGGTGGTAATTTGATCAGTACACCTG  
AGAATAACAATGCTGGGATTTTCCAAGTTGAAAGCAAGCCAATTTTGCCTGATTTCAAGCCAGAAAGTGGGATTCATCAA  
GAGGAGAGCAAGCAAAATTTGGAGACACAAGTGCCTTTGACTTTGTTGGAGAAGTGGTTGCTTGATGATGCTAATGCACA  
AGCTGAACAAGAAGATCAGTTAATGGGAATTGGGATGGGAATGGCCATGAGTGAACTGCTGATTTGTTTTGA

>CcMYB97 |Locus\_ID=BC332\_14191 |CDS\_len=1362 |strand=-

TTATTAAGATGTGGAAGAGTTGCAGATTAAGATGGACAAATTATTTGAGACCAATTTGAAGAGAGGCAAATTTACTGC  
AGAAGAAGATGAAACTATTGTCAAATTGCATAGCACCTTGGGAAATAGGTGGTCTTTGATAGCCCAGGATTTACCCGGCC  
GAACAGATAATGAAATAAAGAACTATTGGAACCTCAATTTACGTCGGAGACTTTACTCCTTCAGGAACTTCAAAGAACTT  
ATTAAGACCACTACAAATGTACCAAAAATCGCGGTTGATGGCGATTCTGATGAATCCTTGAGAAAACAAGATACAAGTAC  
AATGTCGAAAGAGGGTTCAATTGAATCTCTTTTGCCAGAAGATAATATTGTTGTTGATAGAGGCTCCACTCGAAAAACA  
GGTCATTATGTGTTGGAAGCAATGAAGGGGCTACGTGGTCTGAAGGGGATTCACTGAATCTCTTTTACCGAAAAATTGT  
ACAGTTGATATAGTTCCATGCGGAAACCCTACTCCTCGTGTCTAGAGGCAAGGACGATGTTTCGTGGTATAGAGGGGG  
TTCAACTGAATCTCTTTTGCTAGAAAATATAGAAATAAACTTCGCGTGTGAAGAGAATTCGATTGGGTCCCTTTTGATGG  
AAAATTGTTCTTGCTGAGGAGGATGATACATCGTGGTCTGAAGAAGGGGGTTCAATTAATCTCTTTTGTTGGAA  
AATATAGAAACCAACTTTTCATGCCCCAAAGGCACATGCAATGCTACGTGGTCTGAAGGGGGTTCAATTGAATACCTGTTGA  
GTTGGAAAATTGTGCTGTTGATCTAGGTTCTAATCGAGAAAACAAATCTGACAAAGGGGGTTCAATTGAATACCTGTTGA  
CGGAAAATTATACTGTTGATATAGGTTTAAATCGAGAAACCAATTCCTCATCATGTCCCAGAGGCAACGCCGAAGCTATG  
TGGTATGAAGAAGGGAGTTCAATTGAATCCTCATGCAGACAAGTTATATCGTTGATCTAGACTTTCTGACTCAGTCACC  
GACTCGTAAAACGGAAGAACTAGCCATGCAACAACATGACATCATGCAAAATCAAAGATACATGAGCCAAATGAAGAAG  
GAGAAGCCAAGAACATCAAAGACATTATTATGATTACCTAAACAGCAATTGTGTCAAGGGATATGTTCCATTGGGGAA  
CAAGAACAACAATACAAGGACCACATGAGCAAAATGAAGAAAATGAAATTGTAATTCAACAAAAACATAATGATTGTTT  
GCATAATTTTGATAATAATAATTGGTCTAATATAAATTTTGATTATTTCTTAGAAGATGAATATGGAATTTGAACCATT  
GA

>CcMYB98 |Locus\_ID=BC332\_02702 |CDS\_len=1353 |strand=+

ATGGTCTCTCTATTTATTGGCACTGGGCTAATTACGCTGCCTCCACATTGCCACTTCAATAGTAATATAATAATAAGAAG  
AGAGAGAGAGAGCTACTATTGGTGTGGTACGCAATATGGGAAGAGCGCCTTGTTGTGAGAAAGTGGGTCTAAAGAGAG  
GCAGATGGACTGCCGAAGAAGATCAAATTCCTACTAATTACATTCTTTCTAACGGTGAAGGCTCTTGAGGTCATTGCCC  
AAAAATGCTGGATTGCTGAGATGTGGAAGAGTTGCAGACTTAGATGGATTAATTACTTGAGGTCTGATTTGAAGAGAGG  
TAACATAACCTCTCAAGAGGAAAACATAATCATTAAAGTTGCATGCTACTTTGGGCAACAGATGGTCTTTAATAGCCGGAC  
ATATGCCAGGTAGAACAGACAATGAGATAAAAAATTATTGGAACCTCATCTAAGTAGAAAAGTTGAAAGCTTAAGAATA  
CCAAGCGATGAAAACTGCCTCAAGCTGTAGTTGATTTGGCTAAAAAGGGTGCATTGATGCCAATTAACAAAGCAGAAA  
AACAAGTCGAATATCCAATATGAAGAAAAATAAAACGTCAAAGAATCAAACCTTGGCAGAGCCTAAGGAAGCTAAAGAAA  
ATAGTACTAGTGGACCTTTGAGTGCATCAGCAGTTTCTATTCCCTCAACACTAAACATGGA AAAAGAGGCATTGTCTAGT  
ACTATTAGCTCATGGCTAGATGGTAAGAACATGCCAGCTAGTGATAGTGCCATGGATTCAATGCAAGAAGATGTAGCAGA  
CGTAGCGGCGCCAAATCCTAGGGTGGGGTCTAGAGAGTCCACAGCAGCCTTAGTTCAGAAGATTGTGATATGGAATGGC

TTGAGGAGATTATGCCAGACGTGGTCATTAATGATCAAGATATGGACCCAAATTTCAATTTGAGTAGTTTAGAGAACGGG  
CAAGGAGAAACCCCTTTGAACGAAACAGGAAATAATTACTGCAGGACCACGCACAGAATTGATGAACGAAATAAACTGT  
ATCAAGTCAGGAGGCAGTGTCAACAAATGAGAAAAGCAGATTATTAATGGAGGCTGCAAATGATGGTAGACTTGAAT  
GGGATTGGCAAGATGATCATGAATTAGTATGGCCAGCCATGTCATGGGAATTAGAAACAAAGCAAGAGAACATAGGGTCA  
TCATCAATTCCTAGTTGGCCTCTATGGGATACTGGCACAGATTTACTTCAAATTTTATGAATCATGAAGATCCTGTGGA  
AATTGATTCAATGCACATTATGAGTGAAGTACCAAACCCCTAGTGCCCTTGCTGCTTGCTTTGTCTTGA

>CcMYB99 |Locus\_ID=BC332\_14511 |CDS\_len=813 |strand=-  
ATGGGAAGAACACCTTGTGTGAGAAAGTAGGTCTTAGGAAAGGGAGATGGACTAAAGAAGAAGATGAAATCCTCACTAA  
CTACATTCTTGCTAATGGTGAAGGCTCTTGGAGGTCAATACCCAAAAATGCAGGGTTACTAAGATGCGGAAAGAGTTGTA  
GATTGAGATGGATGAATTATTTGAAAACCTGATTTGAAGAGAGGTAATATAACCTCTGATGAAGAAGCTATTATCATCAA  
TTGCGTGCACACTTTGGGTAACAGGTGGTCTGTAATAGCAGAATATTTACCAGGTAGAACGGATAACGAAATAAAAACTA  
TTGGAATTTCTGTTTGAAGTGAAGTAGATAGTTTAAAGATTTCAAAGCGATGAAAAATTTGCCACTAGCTGTTGTGCGAAA  
TGGCGAAAAATAAAGGAATACAAGAACAATAGTCAAACGACAAAGACGAAAAAGAAAAGCCGATTCAAATTTTCATGACT  
GAACTTTCAGTTTCTACATCAAGTTGCTATAATAATAACAACAACGACGATGTTGTTTTGATGGACGATAAGGATGC  
AGAACTGGATCAAGATTTTATTTTAAATTGTTTATGGGATTGCGAAGGAGAAGATCTTGAAATAGTCGAAAAACAATAA  
ATGAAGTATTGAGTTATGATAATTATGATCAACTTGATTGTTGGAATTGGGAACAATTAGATGAAATATGGGCAAATGAA  
GAAGCAACAAGACAAGAGATTGATAATAATGACAATGTGCAAATTGCATGAACCAACAACAAGTACCAATAGAAAATGT  
TGTGATTGGTAG

>CcMYB122 |Locus\_ID=BC332\_25527 |CDS\_len=849 |strand=+  
ATGGGAAGGTCACCTTGTGTGAGAAGGCACATACAACAAAGGAGCATGGACTAAAGAAGAAGATGAAAGACTTATTGA  
TTACATTAGAGCTCATGGTGAAGGTTGTTGGAGGTCTCTTTCTAAACCTGCCGACTTCTTCGATGCGGCAAAAGTTGCC  
GTCTCCGGTGGATTAATTACTTGAGACCTGACCTTAAACGTGGTAACCTTCACTGAAGAAGAAGATGAACCTATTATCAA  
CTCCATAGCCTCCTTGGGAACAAGTGGTCGCTTATAGCAGGAAGATTACCAGGAAGAACAATAACGAGATAAAAAATTA  
TTGGAACACACATATAAGACAGAAGCTTTTGAGTCGGGGTATTGATCCAACGATACATCGGTCTATCAACGAGCCTACAC  
CGAAAGTGACAACCATTAATTTGCTGCTGCTGCTGACAGTACAGATGATCATCATCGAGATCAAAGATAAATATCAA  
GCCGAATTTGATGAAACAAGCAACGAAGATAATAATGAAGTTCAAAAATGTCATGTCTTCCTGACTTGAATCTTGAGCT  
CAGAATTAGTCTCCACATCATCAACAACCTGGATCATCATCAAAGATCAAATTCCTTATGTTTTACATGTAGTTTGG  
GAATACAAAACAGTAAAGATTGCAGTTGTAATAATACTAATGGAATTGGATGCAGCAATAATATTGTAAGTATGAACATC  
GTAACAGGTATTAGCCTATGTTGCTTGAATGCGGCTGTTTTGCCGCCGAACCCATCTCGACATGAGACTGAGGTGTGGAT  
GGTGCTTTTGCCGTCTCTGATTGATCAATCGATTTTCAAGATGTTGA

>CcMYB123 |Locus\_ID=BC332\_13322 |CDS\_len=813 |strand=+  
ATGAAAAAGCTTGTGTGATATCAAGAAGCATGGTCTAGGTAGTTGGCATTCTCTCCGCATCTTGCAGGTCTTGCTCG  
TTGCGGGAAGAGCTGTCGTCTTAGATGGACGAATTATCTAAGGCCAGACATCAAAGAGGACCCCTTTAGCCATGAAGTAG  
AAAAGTTTGCATACAGTTACATGGAATGCTTGGCAATAGATGGGCTGCAATCGCATCACAACCTGCCTGGAAGAACGGAT  
AATGAGATCAAGAACCTTGGAATACTCACCTGAAGAAACGCCTACTTTCAATGGGCATTAATCCTCAAACCTCATGAACC  
TTCTTCAGCACCTAATGGGTTGCTGGTAACCTCACCTTACATCGCTTGACAGCCCGCCATATGGCACAATGGGAAAGTGCAA  
GGCTTGAAGCTGAGGCTCATCTCTCAGGGAATCCCAACTCTTGTTCCATCATCAGTAGAAAGTTCTGGAACCGACTAC  
TTCTTGCGCATATGGAATTCAGAAGTAGGAGAAGCATTTAGGAAATCAACAAGAAAAAGGCAGGACTAGTGAAAGTCCA  
GCCTCTCAAGCATCTTCATCAACAAAATACAAAGTGAAGAATGGTCAACCATATAAGGGAGATGTCTTCCAAGGATACG  
ATGACACCTCTAGCTCCAGTGGACTGGAGGATTCATCTGAATCAGCACTGCAACTTCCATTTGATTTTTTGAAGTAATAAT  
GACATGAGCTTTCTAGACACAGTGATACCTACAGCTTGATCCTGGATTCTTGAGTGAAGCTCCTTGAAGTGCTCTTC  
AACAGAACAATAG

>CcMYB124 |Locus\_ID=BC332\_14051 |CDS\_len=714 |strand=+  
ATGGGAAGATGGGGAATTATAGAAGAAGAATGGAGAAAAGGTCCTTGGACAGTTGAAGAAGATAAATTGCTCATTGAATA  
TGTTAATTTGCATGGTGAAGGTAGATGGAATCTGTTGCCAGGCTTGACAGATTGAAAAGAAATGGAAAAAGTTGTAGGT  
TGAGATGGGTGAATTACTTAAGGCCAGACCTTAAGAGGGGGCAAATTACTCCATATGAAGAGAGGATAATTCTTGAACCT  
CATGCTATATGGGGAATAGATGGTCAACAATTGCTAGAAGCTTGCCAGGGAGAAGTGAACGAAATCAAGAATTATTG  
GAGGACTCATTTCAAGAAAAAGGTGAAGAAATCAAGTACTGACAACCTCGAAAAACAAAAGCCGCTTCTGAAAAGAC  
AACAGTCTCAACAGAAGCAATTATTGAACAGTCAATCGACATGAAAAGGTTTCATGTCACAAAATGAGAATAAAGTTCCA  
AGTCATGTACCAAAACAAGACATGGCCATTTTGTACCAAAATAACTCATTTTCATGAGCAAGAGCAAAGTGGTTTCTTCTA  
TTCTATGAACAACGGATATGCTATTGTGCTGAGGCCTCGTCTAATGAAGACATCATGTGGGATATTGGCTTGTGGAAC  
TGGATGATTTTAATGTTAATTTGCCGGTGTGACGGTAGAATCAGGATTTGCAATAAAGAGTTCAAATATGA

### **Protein Sequences**

>CcMYB3R-1 |Locus\_ID=BC332\_21354 |Protein\_ID=PHU09494.1 |Protein\_len=1038 |  
chr08:163059837-163069990 |strand= -  
MESDRISTPSDGTSSSFQVRSLHGRTSGPTRRSTKGQWTPPEDEILCKAVQRFKGNWKKIAECFKDRTDVQCLHRWQK

VLNPELVKGPWSKEEDEVI AELVKKYGPKKWSTIAQHLPGRIGKQCRERWHNHLNPGINKEAWTQEEEVTLIHAHQIYGN  
KWAELTKFLPGRTDNAIKNHWNSSVKKKLDVYLASGALAKFPTLPNVNHQNSIPSSIKLQSSSEDDSVRKEGTEMEEV  
ECSQSSNLAGCSQSTSDMGNTFVYTREEGLLEDSSNYRKDPSASSAPCSEYYTPAFEDITFSVAEVPSELAESKLEHNF  
SQNWATSMGKDWQFNPDDIPNISPLELMQDSSGFFMQCLTGTGNHDMVTFPQQNEMKFETTNDGSMVVLHKNEMFTSV  
EGCSMVYPEAGIPQCFPSEIGMNGVDETAGSMIYQISEGGNMSIEKCNPLFSDVMGTASCQPCSVPSQFSSEQSSMHFGI  
ASNQFHNPLHTARESQTNKCDGFLYPMESDTPCDNIMDNPLLDQDQSDSVQLVSVNDFRSTPSNTIQTCLPVNENST  
VKEDQMDGGALCYEPPRFPSLDVPPFFSCDLIQSGTDTHQEYSPLGIRQLMMSVNCCLTPFKLWDSPTRDGSPDAVLRSA  
KTFTSTPSILKKRHRDLVSPLSEKRCGKKLESCLQESFSLTKDFSRLDVMFDDSANEKAMPSLTKDQTLQLQASEDKE  
NINPTEDGQKEEDKGRDGHSSCGTSGRQLDGGGEVHYKDQGTRESKRLGAKDAVGKIKQPSGVLVELNASGLFFSPDRFGA  
KSDRGSNLSNKGALGNQYSRRLEAASNQGSVSSSFETSSFSVICSPRIHGKKDGSSFVITTSMQSAPTSTALESSAETS  
GAGAGIIASISGETPYKRSIESPSAWKSPWFLNSFLSSPRLDNELTFEDLALFMSPGDRSYDAIGLMKQLSEQTAGAFAD  
AQEVLGGDTPESILGRNSKNQNAENRSLLSANAMSERRTLDFSECGSPEKEKETEKSTNNNSFSPPSSYLLKGR

>CcMYB3R-2 |Locus\_ID=BC332\_00348 |Protein\_ID=PHU28255.1 |Protein\_len=633 |  
chr01:6524478-6532140 |strand= +  
MIQVKEEALTLFEGGFTSCSSFSDDSYEASTPRCSSEPGSSCQRSSGQTKRSSQAGWTAEDNLLTEVVKRFKGRNWKGI  
AECLNGRTDVQCLHRWQKVLNPELVKGPWTKEEDDHIELVEKFGCKKWSIIAKSLPGRIGKQCRERWHNHLDP  
TIKRDAWTELEDVLCRYHQIYGNKWAELIARFLPGRTDNAVKNHWNSTVKKRLDLNLLSRLGPDQSEGSPDFSSHKKKLEIKKHL  
AQAHNAETLSLSKQAGVDNAADACSTDLRIGCACSPRNDLHKGTSLSFGACKSSVKNARDLIKPLGGIQFGKAEILP  
NGETDQSNLNLTKISDPLLTSLDFPLDPSRKTRWSSSQVKAHVPTTFGRMYESPKRSGYGTVDTHDFLTLSLAGFTEV  
HSQGNKKNKAYDIQSSALKQPGFTEVHSGNKKNKAYDTQSSVLKQPGFTKIHSRGYKKNKAYDTQSSLAHKQPGFL  
NYEPPKVKDLTIPLTDENLSRDNIIGRQNSHLLCSTPLSLTVSANSSSPESVLRNSAMSYTKTPSIIRKKT  
SRFSEASGHYSCTGTTTPMHFLRSVPDREDTSLNKDRISGCKRSVSGKSLGRRLEYAFDMEWDSSRCCTPVSAAS  
PCAIGANTMLTP

>CcMYB3R-3 |Locus\_ID=BC332\_23333 |Protein\_ID=PHU06844.1 |Protein\_len=451 |  
chr09:34354987-34359612 |strand= +  
MDELQVEECCIKENKQSVAASSSSSVSENSGSVNLRSAPVSSPTPVSPTHRKTTPGIRRARGGWTP  
EEDDTLKKAVSVYRGKCWKKIAELFPDRSEVQCLHRWQKVLNPELVKGPWTREEDDKIIELVAKYGP  
IKWSVIAKSLPGRIGKQCRERWHNHLNPNIKKDAWTL EEFERALIDAHRIHGKWAELIAKVL  
PGRADNGIKNHWNSSLRKKLDFYLATGNLPSVKSEELLVCSIKTSEAADVVSSGAIDICKIENGWQV  
TEINGGPQAESTDSEIVRLEAQSPPEEDAIQHIKQSTESENRCNGWNIDS AVGRLQVFEAPF  
PCEISTCGRLYYEPPRSESCIPLDSDLLNIGWAQCASDASPSPSPNGFFTPSTKDHSLYAQT  
PESVLRRTAARSFNTPSILRKRSQGLSTPTNKMRKSDGDFCKDKLIDACDKVQFDSSDKSSMDNGVS

>CcMYB3R-4 |Locus\_ID=BC332\_29224 |Protein\_ID=PHU03973.1 |Protein\_len=995 |  
chr11:250147876-250156283 |strand= -  
MLDYQDLSLSQATMESDETSPKPSDDISSRPLHGRTSGPKRRSVKWTPEEDEILRQAVQQFKGKSWKKIA  
EFCFKDRTDVQCLHRWQKVLDPPELVKGSWSKEEDDKLIQLVNIHGPKWSNIAQELAGRIGKQCRER  
WHNHLNPEIKKEAWTEEEELTLVRAHQAYGNKWAELISKYLPGRSDNAIKNHWHSSVKKKLASGLLAQ  
SPALPNVNHQNSIASSSMKLQETSEDES VHKEGAEEVTECSQGSTLAGCPQSTSDLGNTFMHIREND  
AMLEESIHKKDASSGAAPCPRNSASAFQDVSCSMLNVPDLVDSKFL EYMFSDHGDNSTERDWQF  
NMDDFPGFIEEFGHYMHCSNDNENHAMVADPLQTAMGSGATSNAANMVEGPKPNEMFDGCRIVY  
PEAAISQCSPTSETGVNGTGEPADCLIQSSNYQIPEEGNMAPTNCNALSFDDEASTHQFVSPSHFSS  
EDRSLVFGIASDQFHYPPLNSVLESFTSRCDDFICPSEFGSPSNDNGIDNAVLDLPDHTKDSRLEEQK  
DGGALCYEPPRFPSLDVPFLYCDLIQSGSNTQQEYSPLGIRHLMMSPANCLTPLRLWNSPSGDDSP  
NAILKSAAKTFTGTSPIVKKRQRHLVSPLSEKRCEKKLESYLNQESFSNMATEISRVGDMFNE  
SANEKASTEDKENLHPSSSEDGRKEQDGVVTGLSCIENSERQLDGGGAHYHKDPNSESAGANDTLGK  
VKQPPGVLVERSSDMLVSPDRFLIKCDRATSLSNKALDNQYAGQLEAASNQVNVSSSFET  
SFLSVFCSPDILGKCRSSVVKATSMQSTTSTALVNTAENSEKGFGAETSNIIFGEAPLKRSTESPS  
AWKSPWSLNSFLPSPRYDTELTFEDFAPFMSPGERSYDAIGLMRQLSEQTAPSIADARQILGSET  
PETILSKRTKQKKADEDCALLASNAMSERRTLDFSECVTPPRKGKETTKFGSVSSPSSYLLKCCR

>CcMYB3R-5 |Locus\_ID=BC332\_25921 |Protein\_ID=PHU05099.1 |Protein\_len=562 |  
chr10:174296581-174317749 |strand= +  
MLNGKILMRTTGPIIRAKGGWTPEEVIRFPDKNHLLIINSPMPQDDTLRSAAVAYRGKSWKKIA  
EFFFDRSEVQCLHRWQKVLNPDLVKGPWTQEEDDKIIELVARYGPTKWSIIAKSLHGRIGKQCRER  
WHNHLNPNIKKDAWTL EEEALVDAHRIHGNKWAELIAKVLPGRTDNAIKNHWNSSLKKLDFYLAT  
GNLPPVGRDGPQNGCENNIPTASA EKALVYSHKGSDELASSGTTDICKIGNGGMNHQDAKLLVAN  
IDASNSGPQNESTSEVVRWEAQSPAIDGIHVKPITIKIFDGYGTNSVVDLKVIEPTFSCEIPTCG  
TLYEPPQLGSCISMDSNYLNIRWAHSGPSPSLSPSSFSTPPSSSLKGSSYAQTPE  
SILETAARSFPNTPSIFRKRRLSSTTPGNKIGNADEMRKEEPCDTCEEKQVDSSEKYG  
MNRGSSSRNPAYNGIGPCNTRAFNASPPYRLRSKRKSIFKSVEKKLKFADFNEQHNTSNDSTI  
KEISHVADCLRATKMGMLESVFNPGIIRDTGCHAVGFFVKPHQLPEEFTLHILC

>CcMYB5R |Locus\_ID=BC332\_09390 |Protein\_ID=PHU24283.1 |Protein\_len=994 |  
chr03:257728677-257740791 |strand= -

MAFDSDDDDFSGTDSDEGFQADMEALKKACLLSGKDADDLQPSSSSADGHVAGANDVTLSDTDADEDEDDDFELVRSIQE  
RFALSTEVDHPISMKPLCSILPPGSEGEDDDFETLRVIQRRFAAYGDDNGNGREESLFDKFEQISEECSNDVARSKNLT  
DGHSDAETTAISVNSSRFPKSAHAFVDAIKKNRACQKLIREKMMQTEARLEELKKLKERVKILKSFLTKCKKKMGRALS  
QKRDARVQLISLPKQRFSAKLPKGKLSAIHSGPPENSHVASFKEALTQFAVSLSRKDWSEESLENLAKGVKQQFQEMLLQ  
RSVNLVNLSDSDGCSRESGLDDVIASIRDHKITPETMRSEFIPEVNWQVASMYPGRSGGECQSRWLNWEDPLIKHE  
GWDLSEKNLLQVVQKRMNSNWVDIAASLGVSRTPFQCLSHYQSRSLNASIIRGDWTDDEDSRLCAAVETFGESNWQVVAS  
VIEGRTGTQCSNRWIKSLHPARRRCGKWSADEDKRLKVAVMLFYPKCWRNIGQSVPWRTPVWKKVAQYVPGRTHVQCRER  
WVNTLDPSLKLDEWTEEDLKLKSAINEHGYWSKVAACVPSRTDNQCRRRWMLFPDEVPMLEAKKIRDAFISNFVD  
REEERPALKPNDIVLAHKLKAGCETTSANKKRKRPRRTAKDDKTPKCDAVREMEKQHSEGESEGPESDLINNQESDKIL  
DGEEAVEQGCNDARKNKRSSRRHPRNTKKVKPNDKVPESASSAGESTVADDNICKRRRTSSLVKKKSRTIASASITVDS  
TIADGNSCKRRQRTSSQVKKKSSDKNARRLETSAPVGTLLGGTSGASVRHKLKCNQLKNDDRSCVGNLPETVGDGMTLA  
SFVRKSRAGKCSLFTTKVARLHPDKAQGKAMAGDHSSRSCISGGHDETEKRTSQECTSSNQISGTEVGDDMPLSLFMGKV  
KREKIEVGDDMPLAFFIGKVKRGQPSGAQDRKRK

>CcMYBCDC |Locus\_ID=BC332\_12725 |Protein\_ID=PHU17030.1 |Protein\_len=1155 |  
chr05:11257233-11267742 |strand= -  
MRIMIKGGVWKNTEDEILKAAMKYGKNQWARISSLLVRKSAKQCKARWYEWLDPSIKKTEWTREDEKLLHLAKLLPTQ  
WRTIAPIVGRTPSQCLERYEKLLDAACTKDENDPNDDPRKLKPGEIDPNPESKPARPDPVMDDEKEMLSEARARLAN  
TRGKKAKRKAREKQLEEARRLASLQKRRELKAAGIDVRQRKRKRGRIDYNAEIPFEKKPPPGFYDVTEEDRPVDQPKFPT  
TIEELEGERRDKEARLRKQDIARNKIAERQDAPTSILHANKLNDPEAVRRRSKLNLPAPQIPDHELEIAIKIGIASDLI  
GGDELSEGNSTRALLANYAQTQHAMTPMRTQRTPTSTKQDAIMMEAENQRRLTQSQTPLLGGDNPLHPSDFSGVTPK  
KREVQTPNPLLTSPATPGATGLTPRIGMTPSRDSYGMTPKGTPRDELRIEEMDNNAKFGQFNSKKELLSGLRGLPQPKN  
EYQIVVQPPPEENEEPEEKIEEDMSDRIAREKAEERQALLRKRSKVLQRELPRPPITSLDLIRSLMRSDDEKSSFV  
PFTLIEQADEMIRKELVSLLEHDNTKYPLDEKAEKEKKKGVRKAVAEPATIEDFEDELKEADELIKDEAQFLRVAMGHE  
NESLDDFVQAHETTLNDIMYFPTRNAYGLSSVAGNMEKLAALQNEFENVKKKMDDDTKKATKLEQKIKVLTNGYQMRAGK  
LWSEIESTFKKMDTAGTELECFRALQKQEQLAATHRINNMEEVQKQKEFERTLQKRYGDLVAEKQKIQQLMGDGHRFAQ  
IQEEIAAKNRALAKAEMAEEKDRALELAKAEMAESALELAKAELAEKESVPSAGDVEPSGTGQCSNTEEISASASHV  
PIEADVHVEPSGTGQYSNPEENHASASDVQSAPIEADYVPVEPSGTSNAEENSASIEDDYVLVEPSATSNVENSASIEA  
DDVHVEPSGSGQCPAEEETSASVSHDVAPLDVEGQVKTGRVSAMDVEATSDHVPMEGQQNLVEESNMDVTKTEDSGAVAG  
DADVPKTEDSGLVAGDTDVFKTEDSGVAAGDADVPKTEGAVAGDADVPKTEDSGLVAGDMVFKTEDSGVAAGDADVP  
KTEDSRVAGDADVPKTEDSGVVVTCDEANAGKL

>CcMYB10 |Locus\_ID=BC332\_11130 |Protein\_ID=PHU19979.1 |Protein\_len=309 |  
chr04:176182994-176184609 |strand= -  
MAEGGGYGDDTRSSCCPRGHWPAEDERLRLLEVEYQGPQNWNSIAEKLQGRSGKSCRLRWFNQLDPRINRRPFTEEEER  
LVAAHRIHGKQWALISRLFPGRTDNAVKNHWHVLMARKQREQSKICGKRSLYQQQHDNFLSDSKSPSYGFRRRNINNNNN  
MTKTHEGNYGSKINFFEFQNPKNDRVFSMSSTYSSNSHDFCRRNGSHLVRESSIDQKSLCQNNLSFLSHGGGANYSYKRS  
TIIRNPFSYADRNESNGITERVVNITDGKFSLEKMLRESIEQQQQQYGEERERKDIPFIDFLGVGISS

>CcMYB116 |Locus\_ID=BC332\_22985 |Protein\_ID=PHU06496.1 |Protein\_len=818 |  
chr09:5931700-5937660 |strand= +  
MQMVQQVSLDCDCLHPETFMCKDGFSGVTQNPVALPVIPSKDHPVSQSVLTHDHAVTQLVSFSQDQVILPQPAKRQT  
RQWAAWTRQEEESFFSALRQVGKNFERITSRVQSKNKDQVRHYYYRLVRRMNKLLGPELCLDAKNSKETNAAMLRWWSLL  
EKYSCKASKLHLKPRRFKIFVETLESQVLKDRKKNVKRRPSQGESSTAAASPSSHGRVSTNDSTVKKVLLDNKDAQKF  
GSGKGPSVGRNVTVMGVNRGNVKVDSSVKNARHRRRTGSSSTAAYKRWEKAAIAGVSLVADAAEHLERTTIDKDVGPVQNS  
QGINFGFEHVGKDVHSLSTLSQIFLKETNLQSCMKLKLQFPVDEGTRRALEMDNHNPFLELTLSNRKKMSSVMEHLNRKW  
GSSSIATGELVLPFPHVQMESLVRSLRWTKDQTQIAADVHNLIIGRPVFRLLKYGWFPNAELGTSQEPLSYTPVFQNTNT  
NITNEKNAEIPASSHGSLVRFKSKEPLPSNPRMTVTSSSNKLGESNLQASMGLNTYTSDHDETLPSSHRENDATTAEQDD  
MHDMQGTKASALSAGDWEDSFTNISVGDLLFDAPDDEQTDVDSALPGSSHFLHQTPLSCDSFDAIAAHYKHQSKADS  
QMALPPQASSIWNADTCDAFKKNVAFRDKEQRSSSNVGAENSQRIASSSSLVLDAGIKDLPGNMESFTGETAHEDPM  
DECQSDAQALDGSADPNGLSGIYWTDSLGPLELDAPSCRYHNEDITLSDSFGGLNRLIVDSLDAFQNCSEFFGLDKKEPA  
SSTAKAVETSDLKIGAEV

>CcMYB119 |Locus\_ID=BC332\_09126 |Protein\_ID=PHU24019.1 |Protein\_len=513 |  
chr03:253724494-253726291 |strand= +  
MVQKRPFGEEDLYEVSSKQPRCEPSCQLGSVLEHSSLEAYASGGDEDNSSRTIPDANKKPDShNVAEVLFSFDKETEMSI  
HGSASNSSCPTSTSTSEEEIMPEAPFHILTSPEYYYFDHPFRASAHREIHSPLLSNPQKMVPIGPDFQAELEWDAYNKD  
NPCIDGIHETLSPSSQADENKFAGRITIVLMPKMELLADNVENIAERGVECSCEDIGSIRCVRLLHNEAREKLKLALGEET  
FVRLGFCDMGEVVAEKWSEEEEEELFHEVLSNPASLGKNFWNHLAIEFPSRSREELVSYYFNVFILRKRAEQNRFDPLNI  
DSDNDEWHETVDDADEGAKMTDEDEDSVVESPAYNYLSYNGMGEHEDRPAWEYYPNVNFGSRKVFTDVQESCLGKLFDS  
NSSCKLSMQPQDQGLPNKVVEQEVQGGSCITGAAGVTSESSLGKTNNNKHASDIAGTGIGTNHDSLLEPSNRKEWDVGY  
LSCARNKVDLLPHTMTIEEVFGDGAWIHKS RDV

>CcMYB120 |Locus\_ID=BC332\_11642 |Protein\_ID=PHU20491.1 |Protein\_len=585 |  
chr04:216159659-216165069 |strand= -  
MMEKRKFRRVVFSEHDMSTLLQRYTAMTMTLLQEVAQVKESKIDWNELVKTTTGITNAREYQMVWRHLAYRQVLLDK  
VDDDAQPLDDSDLESDLEAFPPVSNETSLEAAACVKVLVASRAPCDTNMSDGNITIEVPLTISMPNRQTSGTAAENSLHG  
ISAYGTKLTVPVTVQMQLPSVTAAEGLDTSGPGTASYNRRRRKPWSAAEDRELIAAVQKCGEGNWASILKEDFKGDR  
ASQLYQRWSIIKKRNMAGNASQLSEAQLAARHAMSVAFGDNLRAACPTSTNVGPNSSGGPSNSSHFAAADIASGGPQSKH  
RQDLVPSKPIVPKNPLAEPAINPDPMAKAAAMAASSPIAVHSSAAASLQKAAQSKKGIHIMPGGTPAVKSSVPSSFGLP  
SNVHFIRTGLVSRPAGLSNASQSGTQQLQALRSASPAVQPRPATVPSRTNTASVVPSPAPTSSPATAVLGVKSKAAVMQEN  
QTAVLSNARSEKAGVIRAASLANTPQQQVQKGPTFGSGNRLTVKVEGPELGGESKASRIWIQEKLIPSQESPSNKNENTK  
TELAAENTSGQGPAPVTCKVVFKDS

>CcMYB121 |Locus\_ID=BC332\_19144 |Protein\_ID=PHU12214.1 |Protein\_len=133 |  
chr07:197563984-197565536 |strand= -  
MADCDRSSTSDNASVSAEFEQKLLSSRESTIDPPAVTALETTNKETSELEFSEDEEILIAKMFNLVGERWSLIAGRIPG  
RSADEIEKYWKLRIYSKSQGESMSEILLKSKDQSQTIALKEESGHSTENVKKG

>CcMYB15 |Locus\_ID=BC332\_12046 |Protein\_ID=PHU20895.1 |Protein\_len=276 |  
chr04:227488618-227493207 |strand= -  
MQLPPSLGFSFTIIRCSTSTSSSESSSESTPRNDNKAEEKIKGPWSAEEDKILTKLVERYGARNWSLISKYIKGRSGKS  
CRLRWCNQLSPNVEHRPFSPSEDETILAAHAKYGNRWATIAARLLPGRDNAVKNHWNSTLKRRYQQLLQQNSGQMVNGL  
EFRSGSGSGSGSGSGSGMEYMNVDSPKGNTNNYATTMTTMAQCNYTSGVWRNNNNYGGGECDDPMTTSLAPPGMAGEE  
MPERKTESFPAGFWDVMDVIAKEVREYVASTGFPN

>CcMYB18 |Locus\_ID=BC332\_23339 |Protein\_ID=PHU06850.1 |Protein\_len=361 |  
chr09:35908165-35909250 |strand= -  
MRERQWRSEEDALLRAYVRQYGPKEWHLVSQRMNTPLNRDAKSCLERWKNYLKPGIKKGSLTEEEQHLVIQLQAKHGK  
WKKIAAEVPGRTAKRLGKWEVFKEKQREQKENNKVVDVDEGKYDHILETFAEKIVKERSVPGLLMATSNGGFLHTDA  
PTSTPQTLLPPWLSNSSAPSTVRSSSPSVTLSLSPSTVPPTPTPSIPWLQTDGRPENAPLILTSFPHHGVAPPCGENPFI  
TELAECCKELDEGHRSWTAHKKEAAWRLRRVELQLESEKANKVREKMEEIEAKMKALREEQKATLDRIDA EYK DQLAGLR  
RDAAEKEQKLAEQWASHLRLAKFLEQMGCSRLAEPNGGR

>CcMYB4 |Locus\_ID=BC332\_27825 |Protein\_ID=PHU02574.1 |Protein\_len=476 |  
chr11:32488763-32494411 |strand= -  
MQNAMKRSVEAAKTERHIVSWSQEEDDILREQIRIHGTDNWTIIASKFKDKTTTRQCRRRWFTYLN SDFKKGWSPEEDI  
LLCEAQKIFGNRWTEIAKVVSGRTDNAVKNRFTTLCKKRKHEALAKENSNSYINLNNKRVIFPSGLNMDNITEATAPIK  
KLRRSDISDLQIGNEGEKSMGDCGTTNPLLRHPFAVLAQNLHNAGENLASHQRTTGSGSDNKTQGTFLKKDDPKVHVLM  
QQAELLSSLAMKVNTENTDQSL ENAWKILQDFLQQT KDGM LKFQLPEMNFEPGDYKNLIADSRSSNEGTPSWRQPALS  
EDSAGSSEYSTGSTLLSHALADKTEESQAEVCAHQDIESELRTSQMSDQAGLHELENGISCRVSTTRDTLPVCDEEKVN  
NGPATAECEFLNTDFSSPHQVTP LFRSLAAEIPTPKFSESERQFLKTLGVESTSLYPGTNLSQPPSCKRALLHSL

>CcMYB58 |Locus\_ID=BC332\_32563 |Protein\_ID=PHT98484.1 |Protein\_len=355 |  
scaffolds:284407-286110 |strand= +  
MGRPPCCNDKVRNRKCNWIEDDSNTSTYVS NKHGIGNWATMSKSGYGRSGRIQQRWSNRLKPD LKQDNFTPQEEELII  
KLHATIGSRWSIIAQQLAGRTDNDVKNLWNTKLKKKLSAMGIDPVTHKPFSQLTDYGNIGGF PKARTRFVSLNRELKGA  
FMSRPEQLQHSLQSFQNFHSLCVKLPKTEASEECFFSNNRDSSNVNQPVDLLSELQAIKYVTEASNYNSPKAIFSHHPN  
QMTDCSTSSPLSSSSSSSASHSLNENQVNWCDYLLDDAFIPSNFKDQEDEL TIEEKL VSSGAQDG SNNVPSTRDFQASLS  
TKGTSSSSSSSFVEAMLECE NEMFLNFPGLSEDPFY

>CcMYB62 |Locus\_ID=BC332\_19189 |Protein\_ID=PHU12259.1 |Protein\_len=187 |  
chr07:200245005-200245699 |strand= +  
MRCRKSCRLRWNNYLKPGLKKNYSPEEELILKLHKELGNKWSAIATRLPGRSDNDVKNHWD AHHKKRIRLTNANSSTST  
EKFTESSSSDSKNEQSCNSDEADYDMKEVPISSDL SNKLN GVTDWIEEEDNPTLLGQWKNFQVSIQWNNHFQILFAGQVL  
LPIFRQTFDTNFWSESLLDNFWTQPF

>CcADA1 |Locus\_ID=BC332\_14478 |Protein\_ID=PHU18783.1 |Protein\_len=454 |  
chr05:236841288-236847872 |strand= +  
QDILAFPLICPDWNADEEMLLLEGIEMYGMGNWAEVGEHVGTKSKEACVDHFKDAYLDSPYFPLPDMTHVMGKNRKELLA  
MAKGNFTDKKGVSSLGEVVPKDESFSPSQVKVEDSHRKGPSGRLSAVSNAVINSMNASGITGIKKPSSKSQIKNQNEPVK  
LEGRNFGGKKPKSLKEDGSSLMKLSGYIPKREEFDPEYDNDAEQLLADMEFKETETEQERELKRLVLRISKR LDERKRR  
KDFILERNLLQPSEFEKNLSPEEKDL CRRYDAIMRFLSKEEHEELMKT VVSEHRYLKRIQELKESRAAGCHSSTEVD RYL  
ERKRKKELEDGVPRKESSQIGPMSQESLNMPASSDSL GTHSNRKPCSQANLSSINDSGVAALSAGELLSEPEKQLCREIR

LSPHHYLRMQEVLTIQIYSGNITRKSDAYPLFQIEATKVDRVYDMLLKKGV SPL

>CcADA2 |Locus\_ID=BC332\_18760 |Protein\_ID=PHU11830.1 |Protein\_len=561 |  
chr07:148423949-148442581 |strand= -  
MGRSRPVRQSTDDPTQSRKRRAAPNVENFDTAAGQMLTEGKKALYHCNYCNKDISGRIRIKCAVCSDFDLCVECF SV  
GAEVQPHKSNHLYRMDNLSFPLICADWNADEEMLLLEGLMEYGLANWAEVAEHVGTSKSLQCIHEYKSIYISSPCFPLP  
DMSHVMGKSREELLAMAKEQGYAAPGEVNVKEESPFSARIKMEDQREENSAGLASVGGASGKLAGAGKRTSAVLNSKEN  
HDSIKLEGCPADRSVGEKKPRTSVDEGPSMTELSGYNSKREEFEIEYDNDAEQMLADMEFKETDSNAERELKRLVLRIS  
KRLDERKRRKDFILERKLLHPDPFEKDLTPEEKDICRSYRVFMRFSTKGEHEDFLRSIIIEHRMAKRIQNLQDARAAGCR  
TSAEAERYIEQKRTQESEENIRRLKENSQNGPSGKYLQRAGHFKVEHDSPPSGVVRGPEMLDSCCKDLSSTTAPHGVGSA  
LDIWDVSGFLGAELLSETEKKLCDEIRILPSHYLNMQLTMSMGILNGNITKRSDAHGLFNVDPNKVDKVYEMLVKKGLAQ  
A

>CcARR1 |Locus\_ID=BC332\_14187 |Protein\_ID=PHU18492.1 |Protein\_len=663 |  
chr05:230788833-230794556 |strand= +  
MNLVASSSVSWKSNSNSDRVEKNEFPAGLRVLVDDDDPTCLRILEQMLRNCHYEVTASNRAEIALSMLRENNGFDIVI  
SDVHMPDMDGFKLLEHVGLEMDLPVIMMSADDSKDVVMKGVTHGACDYLIKPVRIEALKNIWQHVRKKKHEWKDKDFEQ  
STNVEDGDQHQKPPEDVDYSSSANEGNWKSSKRRKEEEDETEERDDTSTLKKPRVWVSVELHQFVQAVNQLGIDKAVPK  
KILELMNVPLGTRENVASHLQKYRLYLRLSGVSGHQHGLNDSFMGHPEAAYGTMTSFSGLELQALAATGQLPAQSLATF  
QAAALGRSATKSAISMPDVDQRNLSFENPKLRYPEGQQQLNNSNKQINLLHGIPTTMEPKQLADLHQSSQSFVAMNMQG  
NARMQQNNALLMHMSQQQKQPSRGQMLNESSNGQVSRPPLSMPQLSSNGIPAAILSRNGIVDNVRGPVYNPVVSQASSM  
VDFSLNQTTTELQNSFPLVSSNSGMSTLTSKRLLEEVSNDIKGSRGFPVGYDIFEELHQKSQDWGIQNVGSFAFGSDHS  
GIPGTLDVSPSMLVQQGISSMKNGQNGNSPMGGPQLNLFSGGNFLTVKAEQLPDTSYQSNSFLEQFGQDDLMSAILKQQ  
ESVGEVETEFGFDGYPLDNLVP

>CcARR10 |Locus\_ID=BC332\_02543 |Protein\_ID=PHU30450.1 |Protein\_len=688 |  
chr01:196871152-196875839 |strand= -  
MENDSAAVATTTTCKTTTTWSTWEELLLAFVAKRHGLKNWESVAMELQSRISLPVLLTAQICKDKYHDLRRRFMNSYNNN  
SYDEKINDSFDEGVLDVDGNGDVTIPWIEELRQLRVAELKKEVQRYDLSIQSLQLKVKTMEERERSLKEKSLDDGKRP  
DLEDVKEERSQNDKNKGADVKEPEDSTGKAVSSEESDRENRSFNESNSTENRETGVKNEPEPVEIGEDKPVQEVKPVSEAD  
SYNDSSSDRQEKKVRDSDGLRDTVSESKEETKENSVDQSTATLTRKRQCSGGDGGRRNGGDAAEMASPAVGIKGEVTAK  
SEPLIEFLDIIRSHKRGSMFKRRLDSQKADKYKSIIRQHMDLETVQARIDGSCPAKFYLDLLLVFNNAIVYFPKSS  
SESTAANELRSIVIEELKKTRTQSKDQSPGPRPLAPLKIQLKPELEISDSLLAKHKSTVPIVVCRRKSSISAKAAGSGNNK  
PEKHGDSKPPPLNPKPPIKSSSNEEEESSIKLGMKEKPVGTGARSRRSSKGRSNNNASPSNNNNQNTNPKQTNSGGDKED  
AKPEKKKEESKKRGAAADFLKRIKTSPTKGTLIEALKNDPTEDVVSVKVSNKKEQKKKKVDDRREVPVRRSGGGGSAI  
KEEGSPSKRSVGRPPKRGGREVVVQEKRGRENSEKDDSSKRPKKRSRR

>CcARR11 |Locus\_ID=BC332\_21691 |Protein\_ID=PHU09831.1 |Protein\_len=650 |  
chr08:176152943-176154895 |strand= -  
MASKSSVRLISYSEEIINGEPIYISSNCCPIKANKYEPAGLAFHSAALRLLGHVEKEDPEDGKEDVPNDKEQPFMYSSSES  
YSSKGKKKSSTGEKIQDHYALLGLSHLRYLASEDQIRKSYRDAALRHHPDKLASLLAEETEAQAKKEEIEENHFKAIQ  
EAYEVLIDPVRRIYDSTDEFDDEIPTCAPQDFFKVFPGAFLRNGRWSVTQPLPSLGENTPIKEVDSFYNFYFYSFKSW  
REFPHADEFDLEQAESRDHHRWMERQNAKLSEKARKEESARITLVDNAYRRDPRIILGRKEAEKAEKQKKEAKILAKKL  
QEEEEARIVEEEEKRKKEEEEEKAAEVASQKKLKEKEKLLRKERSRLRTLAAPVLSQHLLGLTDDDVGVCMSLDIEQM  
RNLCDKLDGKGLVKAELLREALGQKHNSKYENKDNSKSKQNGSLEDKIQVSLMSSEKREKPSKEEVDLLRKGVLYKYP  
KGTSTRRWEVISEYIGTARTVEEILKATKTVLLQKPDSAKAFDSFLEKRKPAPTIASPLSTRAEVEGVNDSSKPESGSAKL  
ANSQESLSQNTNSQKTEDAPAANGVSSSSDSIWSAVQEALVQALKTFPKETSQRWERVATAVPGKTVNQCKKKFALLK  
ENFRNKKSVA

>CcARR12 |Locus\_ID=BC332\_02846 |Protein\_ID=PHU30753.1 |Protein\_len=1141 |  
chr01:225825416-225842774 |strand= +  
MAPAKKSKSINKRLSPTTEISPSKDGNGDNGKSLQRKRKLSMDLGPQWSEEDLTRFYQAYRKYGKDWKKVASTVKFRTA  
EMVEALYTMNRAYLSLPEGTAASVAGLIAMMTDHYCNLAASDSEQESNEDAGTSRKPQKRAWGKVHPNISKTEMTSSALA  
ASHGCLTLLKKKRSGGSRPRAVGKRTPRFPVSFSYENPKGEKYFSPSGQSLKVQPHDTHDDVKIALVLTEASQGGSPQF  
SKTPSRWTDGAMFSPIGTAERKRVKMDGNALLLSNEVDEEEGSMEADTGELMRYKNDFEEAETVGRTTQKQKRAYGKKL  
EVDDSGENHFDDIKEACSGTEEGQRLGAARGKLEMEATDEKNARASLQPRKRSKKVLFRDESSSFDALQTLADLSLMM  
PAAENEDESMMQVKDEIDHDFDESGSLEAVPAHKQRDKRGSAGVKSRWSQSLSKFEVTSRSTSKHGKVTSSDVNAVPEK  
QARRAQKAMSSKARKAEGHVDYDVTESEQAAVKDASKKSTSGKRSYQCVSPKLIKQEHSSCADPRTERSDSAQSTAQI  
PVENQVNLPTKVRSRKMDLKKPQKQKDLKIPDKSLDDTSASFTALRDKAFSLKKKISSCLSNHQVRRWCMYEFYSAID  
YPWFAKREFVEYLHYVGLGHVPRLTRVEWGVIRSSLGKPRRFSEQFLNEEKEKLNQYRESVRSHYTELREGTREGLPD  
ARPLSVGQLVIAIHPKTREIHDGNVLTVDHSCRVRQFDRPELGVFEFVMDIDCMPLNPFENMPTLLTRHADAVDKFFESFN  
ELKMNARANEFMKFPAGDSTENGDVSSHFSPPSPVSNLLKQTKVASAEADMQSKSGVMETTVYQQIAYS KPSTVAQIQ

KEADVQALAE LTRALDKKDAVVLELSLMNDDVLENQKSDDCFLKDSEPFKKQYAAVLIQLNEVNEQVSSALYRLRQRNTY  
HGSIPLAWQRPVPNFADPSILSTFDRCMSQPQESGLVNEIIESSKIKSWTMVDAAVQAMLSYTRDNTTEKIEEAIDYV  
NDRIPDDSCMPIPPDLKSKNVSDRRNEAIEPSELITKCVATLLMIQKCTERQFPADMAKVLDASAVASLQPCCSQNFV  
YAEIQKCMGIIRNQIMALIPT

>CcARR13 |Locus\_ID=BC332\_24051 |Protein\_ID=PHU07562.1 |Protein\_len=1919 |  
chr09:205001111-205026436 |strand= -  
MHGCGAESDPIDSEADSMGVGIGNKTSPQRSTIEEVQNELRQGYGFLEIKRRELEFLEKGGDPLDFILGNATSVSVQST  
SLTDQHQQDLVTSEAKGSFAITASPHGDSVESSGRLGAPQLCEPNSADNLMLFDGENEFIEAERSCRYPSRSNITPSEQS  
SKLDRSRNAKELGDSAAFVGPVKSYKRRYRPRPNGDTRSSSTDIILGPGGHGTSLSQHFSDKVKAQVSDGENPKDQSS  
SLSIARPSIPNGFVVPKTPPSDNLLDTEIHGFKVAEATTYLNEDLAYSIPASASRCLLDNQHDQNSLADIEDVSIQES  
PERPQSSLGKEGVGSAGQEGPLCTTAVGLENQASSHHINGSCGKSDQKSMNPDAQSSGAALGTKGLDSESSCSRARSLN  
RNTNNAMSNNPNTNLDNGLKEQLSVPEATQVIESNLKEQKEVKTDSCGFTNKGEVKDKITTQVEAVEPSPSETERKPT  
TNISDSSNSQKLYSSIIGRQGSIECRIPVPSQHVSPHGVLTPFEAQAPAINVKLATRGDEDSILKEAQIIEAKRKRINE  
LSAVAFPLKNHRKSHWDYVLEEMVWLANDFAQERLWRMTAAQALCRQVAFARLRFQEQNSSCKLKKVAHIMAKAVMGFW  
QSIEGKNEQLELPVTRKDHAIAIREYAMRFLKYNDSDVRQSLAEAPVTPERVSGGGIVDAPREDHLGEENLFYAVSFGAM  
DAYRKSIESHALLCVKIGGSMHEEVETSACDTIPEFGAQDYAFEEDGESSPYDTSVAIEGNKSSKFSQKQRKIHIKAYS  
GRPYDVRTDVPFTRVEYKFGTQSQMLGKRPNLNASIPTKMRMSASRQRVVSPYSATTSGCAQLPVKTDASSGDTSSF  
QDDQSTLHGGSFMPNSLEVESVGNFKKHLFPDSEVSKPKKKKKVKILGSAYEQRWQVDSNFQNEQRDPSRKRLSHQLD  
SNGHNLFGQHVAKPKMMRQSIENSFENVGSVGGFVPSAASQMSNMSPNQIMKMLSGRDQGRRAKTFKMSAGQASSG  
SPWSLFEDQALVVLVHDMGPNWELVSDAFNSTLQFKCIYRKPDKCKERHKMLMDRSGDGNDSADDSGSSQYPSTLPGIP  
KGSARQLFQRLQGPMEEDTLRSHFEKMILIGQKYL SRKNQGYKFDSRQIQPHDSHTHALS QLYPNNLNGGPILTPLDLW  
DAPSPSPDYPVSGCQGRPSGLSVSSHALNSVLPVSGANSTVQASSMIGESNL PSSSPLNASVRDARYVVS RPASLPVD  
DQRLQHYNQMRNMQSNMSAPGVLAATNRAGVRTLSSGNSTCIMGGINRGIPMARPGFQGVASPSMLNSGSM LSSGMVALS  
NTLNIHSGVRSNQVNSMMRPRDGLMTQPPQNQEAQRQMMVPEHQLQASQGN SQVVPFPGGLSSSLPNQ SASPVTPYPLH  
LQQSHPMSSQQPLMLSPHHPHLQGANHATNSQQQAYAFRLAKERHLQHRL LQQHFHSHSQPHPISSSLQNSPKTTSQSS  
APPVSVTSPTSPTPISRPHALPAHGHAWTAQTAGSSLTTQMSKQRPRQTGGQQLQ PAGKHQPPQRQSQSQEQEAKLLNGV  
GRGNMMMHQNLQIDPSLMNGFSNNKANQSAWKGVHATSLMQHGGLYSGSANSP AHLVKQAMEPHSSSPQQPESKSYSGRL  
PLSTKHLQQEMPCNPDNSNQSPASLDASDTNSSQLSVPSSVVGSSNHHEL VHQAQWQPQPKLLNQKEATVQRVLQQNHV  
VNSNPSKRLQADEFQAEQRSTCKTSKIGAITSM PQDCNNPTTVSGVSPLSANQWKGAEP LFD SIGAPPTSSAGSKVPVQV  
SRGVSQRQPSGNSSPTGPDFSVNWQKSSQLQPPSSVTQPQLQQQQQLSPSQHSQQQGQVLQAGNSSLFARPND CRLD

>CcARR2 |Locus\_ID=BC332\_02094 |Protein\_ID=PHU30001.1 |Protein\_len=670 |  
chr01:156123343-156127931 |strand= +  
MNIGSGSLVTVPSSSTGSWKSGDVVSDQFPVGLRVLVDDDDPTCLRILEKMLRKCHYEVTCKNRAEIALSFLRENKNGFDI  
VISDVHMPDMDGFKLLEHIGLEMDLPVIMMSADDSKDVVMKGVTHGAYDYLIKPVRIEALKNIWQHVVVRKRYEWDNNF  
DQSGSVEEGDRQKPSQEDVDYSSANEGNWKNSKKRKEEEEEVEDRDTSNLKKPRVWVSVELHQQFVQAVHQLGIDKAV  
PKKILELMNVPLTRENVAHLQKYRLYLRLSGV SQHQNLNNSFMGRPDATFCTISSNLGLDLQALAAAGQIPAQNLA  
TLQAAALGKSATKSAISMPLDQRNFFSFENSKLRFPEGQQQLNNSNKQIDLLHGIPTTMESKQLANLHHPQSQSFVGMNMQ  
VNSTSQHNNSVLMRLSQSQPRTQLLNGANNGSQVSRPLSMQQSLSPVLTQSGIVDNARGSVYNPVSQASSMVD FSVNQS  
KELQSYNFSLGSNSLGMSSLTNRGMLQEEVNSDIKSGRFGPSNYDIFNELQPKSQNWGLQNDGSTFDTSLHPCMQGTQDV  
SSQLLLQQGISSTHNSGQNRNAPIEKPMYSNGDEIGHSTNMC GSQLNSGGGNMLAVKAERFPDADYQNTNIREQFGRDDL  
MSAFLRQQASVGPVETEF GFDGYTLDNLPV

>CcARR3 |Locus\_ID=BC332\_31526 |Protein\_ID=PHU01739.1 |Protein\_len=568 |  
chr12:225454845-225458703 |strand= -  
MATSGECLNSGGFGSEFPTFRLLVDDDDPSCLRVLECMKKCHYEVTTC EHAEVALSLLRENRRNFHLIISDVHMPDMDG  
FKLVELIVLEMNLPVIMMSVDDSRSVIMKAVIHGAHDYLVKPVSI EALKNIWQHVVVRQNKDEWKGKILDRLGNVEGAEYS  
DAAKEGRLKSSKKRNDKEENEIGERNDTNTVKARVLWSPELHEKFIQAINQLGGDSKIPQKILKLMNVSGLEREHVASH  
LQKYRLQLQKNRSGLESGFMGHSEVTIGTLLNNPDVQTLAPMDQHPVQNLTT HQGPTWVRPKSPIFIKEPTWGSPTTKSP  
IFMQRNHLSFQNPVLR YQGPQMMNSNKQVNLPCGIPTTEQFLRMNIPVARIFQPQLQVQNMLSESNKILSQNGIVDDTR  
DSMYNQVPRTAVDFSLNQNIPLAGTNFLLSANSTVSATTEQVNIGYDNFSEL CQKAQDWGLQNVVGSTFDALMEQNGQN  
VNAPIAEAVFSSRQEIGHVNPIDGPQVNSVKAERYTSSYQSTIFLEPFEQDNDLMSALLEQHESSVGQVDSVFGHDE  
DAFENLPV

>CcARR4 |Locus\_ID=BC332\_13151 |Protein\_ID=PHU17456.1 |Protein\_len=632 |  
chr05:43213413-43221277 |strand= +  
MASMSGVGATCKSEATVADHFPVGLRVLVDDDDVCLRIIEQMLRRCKYSVTTCTRATVALNLLRERRETFDIVLSDVH  
MPDMDGFKLLELVGLEMDLPVIMMSGDGRTNLVMRGVQHGACDYLIKPIRDEELKNIWQHVVVRKRYNSNKEHECSGSLDD  
NDRYKRGSDDVECASSVEGADGVIPQKKKREAKEDDTEVENDDPGTTKKPRVWVSVELHQQFVSAVNQLGIDKAVPKR  
ILELMNVPLTRENVAHLQKFRLYLKR LSGVVQQQGGIPSTFCGPMEQNS ELVSLGRFDIQALAAAGQIPPETLTALHA  
ELLGRSTSNLVLPAVEQQNLLQASLQQA KMPVDQLVAYGQPLLKCPPSISNSKHPSQSILSAEDVHSGFGSQRANKICM

VPSSNPTGIAAPNSNMFAMMMQHQQWQKQQQLELQHRQSGPLESNYSINVQPCVVLPSPQPGNFQVGDSPASISRANS  
LSKSSVVDYGVLSPPQSNSSGVIQVLDRELPECGSNRLSSGGSLSCSCSINADNSVGLQFHNSSSAFGSSKQLPLGNPN  
HLGSPVPYNINSSQVLDQGHIRNPVVGKGASIPSRFAVDECESAMCNLNTAKSYLEDKVKQEPNMNLMENC

>CcARR5 |Locus\_ID=BC332\_28216 |Protein\_ID=PHU02965.1 |Protein\_len=581 |  
chr11:102358775-102362626 |strand= +  
MMMENTSKNSSGFSTPRSDNNTFPAGLRVLVDDDDPTWLKILEKMLKKCSYQVTTTCGLAREALYLLRERKDGFDIVISDV  
NMPDMDGFKLLEHVGLEMDLPVIMMSVDGETSRVMKGVQHGACDYLLKPIRMKELRNIWQHVLRRKKMQEARDVGNHELDQ  
YDEVWMLNGAEILSGKKRKDFDNKHDEKEMSEPRGVDSSSMKKARVVWTVDLHQKFVKAVNQIGFDKVGPKKILDLMGIP  
WLTRENVASHLQKYRLYLTRLQKENEVKASFQGVKHPDVSSKETSSSLSLQNPVDVCTDVTNDKYGGVSGGKAIVQNGKS  
SICESKVKVVSVPAAEPSSVVGDNFDSPPAAVSKIGLNDSFGLVNTNVKNSKVPTTYCSTGEAPQPQYKQDFNQSANSS  
HQPLPVVSHQIPVDHTQETCFLSHVPSREERDRHPDTKNKPSFFKSKSEGVGKYSPIESTINLFQQVNQQANFHTLQOMA  
STTWTGTSNHNVNQPSAGNLTSRSGSIVASAGEDMCGASILGECFLANGLPNTQFGYNDPQPISGVPTCLYDTLRF  
DYEYPVDSLEGIVMDQGLFIV

>CcARR6 |Locus\_ID=BC332\_00798 |Protein\_ID=PHU28705.1 |Protein\_len=560 |  
chr01:20167363-20172786 |strand= -  
MICIEDELLGWKDFPKGLKVLLEDSDNSAAEMKSRLEKMDYIVYTFCNESEALSAISSKSEGFHVAIVEVSAGDNDGVL  
QFLESAKNLPTIMTSNIHSLSTMKCIALGAVEFLQKPLSDDKLKNIWQHVVHKAFAFNARKDVSGPLEPVKESLLSMLQLQ  
PEKGEPDDKSSNGTEPLIAVADNNTQSSGCDKYPAPSTPQLKQGVRSVDDSDCHDHTIFSADQDSGEHDEDIILKEENG  
SSPHQTMEDIATFSQINDCADNSDGSSPHQKTEADIATTSSQSKDCPDNSISHSAEPSKASGPHSSSGTKSNKKKVKVD  
WTPELHKKFVQAVEQLGIDQAIPSRILDVMKVEGLTRHNIASHLQKYRMHRRQILPREVERRWPHQPQSDVQRNYYPHK  
PVMTFPPYHSNHVAPAGQCYPAWVPPASYPNGLQVWGSPPYPGWQPAETWHWKPHPGLLADTWGSPVMPPSFGSYPPYPQ  
NAGMYQSHGMHNRYSMLEKSFVHPAAEVIDKVVKEAITKPWLPLPLGLKPPSMEGVLDELSRQGSTVPPRINGSRCWR

>CcARR7 |Locus\_ID=BC332\_15933 |Protein\_ID=PHU14728.1 |Protein\_len=557 |  
chr06:193757966-193762406 |strand= +  
MVCTENDLLGWKDFPKGLRVLLLDKDSNSASDMRSRLEEMEYIVYAFCNETEALSAISSKSEVFHVAIVEVSAGNSDGGL  
KFLEGAKDLPTIMVSNIHSLSTMKCIALGAVEFLQKPLSDDKLKNIWQHVVHKAFAHSGGKNVAESLKPVKESLLSMLLEL  
QPVKREADSENSNEAEPLTSVLENQKESPPCCDKYPAPSTPQHKQGVRSVDDGDFQDHTILSNEQDSEVHEGDTKSVETT  
CCDSVAETSILADSAGRLEVAITKDERDSAADQNMEDPIATCSRSNDYPADGSTRSAESNKASGLHSSSGTKANKKKMKV  
DWTPELHKKFVKAVEKLGIDQAIPSRILELMKVEGLTRHNIASHLQKFRMQRRIILPKEDEKRWPRQLRDSVQRTYYYP  
HKPVMAPFTYHPNAPTAGQFYPPWIPPGGYPNGAHMWGSPYYPGWQPPENWHWNPHSGLYADVWGCPTPPSLGSCTPY  
LQNASGIHNRYSIIQKSVDLHPAAEVIDKVVKEAIIHKPWLPLPLGLKSPSTESVLDALSEQGISAVPSRINGSRRPH

>CcARR8 |Locus\_ID=BC332\_23287 |Protein\_ID=PHU06798.1 |Protein\_len=427 |  
chr09:29910164-29922823 |strand= -  
MAAPYYGMIDEVHVVLVDDKEFVNNMVDLLKSYDYKEDTPYWTLLALLCTYCDSDVIDRAGSMIYNGKSRHIKWRHN  
TIRELLSSEIITVDYVRSKDNVLIPLTKDPSRKGKSSSLKGMDLRPTSHHCVMVVGTAALDAMAMLSKGKQKIDVMILNI  
HSSNTLSFHLLARVVALDIISLVWDEQNELVVKAFDEGAYLCLKKPFDKDITKYIWQFVVGEKLKREKARKGFENNKN  
QMNKIVKRKNCTEWTEALHAKFMEAVQLLGEGRCPYKEILEVMNVPLTRMQVASHLQKCRNDWRSPEERKSLHRPLGQ  
GSSSDFHESRSNGIVSSRNIRNEISNGYNLNVSMNDVTSYSSNATMYDITYGVNVAINGLEENPNVQYIGEPNISNMNN  
PFQKLEPPSASLHNEQDNDFDQVYYDD

>CcARR9 |Locus\_ID=BC332\_23270 |Protein\_ID=PHU06781.1 |Protein\_len=290 |  
chr09:27579625-27581268 |strand= -  
MNKIVKRKNCTEWTETLHAKFMKAVQLLGEGRCPYKEILEVMNVPLTRMQVASHLQKCRPNDWRSPEERKYLHGPLGQG  
SSSDFHESRSSFFKFGTMPHLQIKEPNLNCNPNTQRNSDLSFNLSTNNTFAREESPFQQHRYRQLHVQSPYLSNFP  
FSNPFLSIQNTISGGLQQQQQRSLFGILYSQGLQGPIIKNNYRSDVVINSGHHTQSDYTLNSIVAQGATYSGSGIVS  
SRNIRNEISNGYNLNVSMNDVTSYSSNATMYDTHVGNVAINELKEANPNF

>CcMYBH1 |Locus\_ID=BC332\_28265 |Protein\_ID=PHU03014.1 |Protein\_len=298 |  
chr11:121715985-121724090 |strand= +  
MGAPKQKWTSSEEAALKAGILKHGPGKWRTILKDPEFSGVLFLRSNVDLKDKNRMTVMANGWSSREQTKLAVKKMKQAP  
KQDGSMTDTTAAESDEEAEEARPATTSSGSPQIHGSKSMIRLDNLIMEAISSLKEPGGSNKTITIAEYIEAQYWAPPNF  
KRLLSGKLKYLATGKLIKMKRRYRIVPTSTPSDSRRNLSITLLDNKQRIFSKIDRDDNLMLTSQIDLELAKMKHMKPQE  
AAAAAAQAVAEAEAAIVEAEAEADREADAAEADAEEAAQAFSVAANKTLHGRSAPRMVRH

>CcMYBH2 |Locus\_ID=BC332\_09595 |Protein\_ID=PHU24488.1 |Protein\_len=288 |  
chr03:260830127-260836063 |strand= +  
MGNPKVKWTSDEEDALKAGVAKHGTGRWKNIILRDPDFASLLSNRSNIDLKDKWRNMSIYPAGQGSKDKSRVARARPM  
ALVPSTAQNVTPIASAFEPSLAQSVPAITSFENEAIIDPPKNSQEGHLNSDMIIFALSSMKGSNGSDLGAIVGFIEQR

HEVPQHARRLLTTKLRRLLVLQGKLEKVENCYKMKDATSETKIPTPKQKHVRSWVPNSAVKVSCGTTEEAARIAAEKIVD  
AEHKCFLEVEAIKDAEVTSKMAEEAETMLLLVKEIYEQCSRGGVLLA

>CcMYBH3 |Locus\_ID=BC332\_18613 |Protein\_ID=PHU11683.1 |Protein\_len=280 |  
chr07:104281258-104308863 |strand= -  
MGNPKQKWTSEEEALRAGVAKHGAGKWKNIQRDPEFNHLLYSRSNIDLKDKWRNLNVSANGQGPRDKSRTPKVKTNLDA  
AAAPLPIMQAPVSSTLVPQDASADTVMEDSSKCALDGNASKYNQMIYDALSSLKEPNGSDTSTLVNFIEQRQEVPPQNF  
RLLSSRLRRLVQQDKLEKIENCYKIKKEVLEKTKIATPKQKHVGPRQFPNSVYLGDTAEAAITAAYKIAEAENKSFVAA  
EAAKEAERVSKMEEESDNSLQVYKIDFDKCSHGDIVLLMA

>CcMYBH4 |Locus\_ID=BC332\_03653 |Protein\_ID=PHU25321.1 |Protein\_len=293 |  
chr02:91837168-91842324 |strand= +  
MGAPKQKWTAEFEAALKAGVAKYGVGKWSTILKDPEFAVLRSRNVDLKDWRNLHVMASGWGSRHRGRAVSKSVQAP  
KHDDNNLVSSVGENDIEVLDAKLASSGEVLKDVGSKPLTRLDDLILEAIVKLKEPRGSSRNAISSFIEERFAAPPHFE  
KLLATNLKALTEKGRLVKVKHYRIAPSRVSSDAKGGSFSSLMGGKLDSTVVEKNETRILTAKQIDADLEQMKSMSAEAA  
AAAAQAVAEAAIAEAERAARIAEECEAEAAQCFAEVASKALQHQTIVH

>CcMYBH5 |Locus\_ID=BC332\_32845 |Protein\_ID=PHT98253.1 |Protein\_len=1066 |  
scaffolds:437968-458977 |strand= +  
MSYYDQPPPVGVPPPGYPPKDASYGYPPQGYPPQGYPPQGYPPQGYPPQQAQQGYPPQGYPPPPYGAQYAAPPPQKNSS  
GSTDILTGWIFFLNSWMGAPKQKWTPEDEAALKAGVHKYGPWKRTILKDPEFSKVLSSRSNVDLKDWRNMSVIANGWG  
SREKARLALKRMNQARKQDESSLAVITEAKSDEKMAEARLATTISGSPQIGGSKRSIIRLDNLIMEAISNLKESGGSNKT  
SIATYIEDQYWAPPNFKRLLSAKLKYL TATGRLTKVKRYRIATIPVLSKRRIPSIPLLESQRISATVDQDDFKMLIK  
AQVDLELTMRMTPQEAAAAAAQAVAEAEVSMAEAEADAARKADAAEYAEAAQALAEAMKALKERSSPRIPTLLACK  
YGKSGVCNSKGLPAMDGNLNDNAFLRARIKELERERDELHKDIEQLCMQQAGPSYIGMPTRMPLHRIAGLEQEAESLKKK  
LSACTRENQNLQEELSEAYNIKGQLADLHSAEVSKNIEAEKQLKFFQGCVAFAAFSERDHAVMEAEKAKEQEELMSRGLHE  
LQQRIEELSCELLEEKILTATLQGDMDREERLDEIFKEVVKFYEIRRQTLEDIEDVSWEDKCACLLHDSSEMWTFSNPG  
ETSTSNYISSLEEQVETLRKSLDNLQYKLLVGLIEIENHLKKKVRALKQKILSEEKLRQISAFRHYHSQHRVNITSFLD  
EGFSHIKSAMNMVEEKLKDCSISERDLNSSQVDDLQFSELECQDVQIKNVDGSDLI FKRNPQSLTTTITVGNSDASKALA  
VALNEKVETLLLLSQEERHLLERNVNAALQKKVEELQRNLLQVTNEKVKALMELAQNLNDYQVLHEKVNEASRQGKSLG  
EIAVKRTLQEKDGRLLNLLKTSYLRRWTGIQSDSDVNDADTHRDSEANFADRRPTNNVDFARMKIENATLKESLESMEHLI  
RAVRRRLRLSLLKFKEAASEGMENCYSVSLDNIINEASQLKTALGSSLPLSWSAEADSGSVSKHVEEETDNGHSTRENMD  
FVSAAGFEMVELLVFAQLLKDYKCS

>CcSWI3A |Locus\_ID=BC332\_08722 |Protein\_ID=PHU23615.1 |Protein\_len=601 |  
chr03:242779171-242784712 |strand= -  
MHNYSKPISIHFTKGYLSTSPHYIVNQFLVCAGEFVMDTSRSQDEPDHDLYTIPSYTSWFSWQSIHEVERLSLREFFDG  
SSITRTPRIYKEYRDFIITSYREDPTRMLSFTTEIRKALVGDTVHLKVFTFLEKWGLINFDPNAAAAAAVGGVAEEED  
KEDEKWRIRVEEGAPHGVRVVAAPHSLKPLIPVKEVIGDGGGGGRVGGVVKVSPLASYSVDYVGLVGEKKESVVCESC  
KEQCASGYEYKNDASINLCEKCFKSGNYDNKSTDEFKLMGDNANPNANWTEAETLLLLLESVLKHGDDWDLVTQNVKTS  
KLDCISKLIQLPFGDFMLGSIHRKLNFLDKNGEVSGVDQAQPAISESGETPGNQSHEQNQEHQONGDAEDETPLKKIRR  
APISEASSFLMKQVARISGAVGSHITASAAEAVALCYENQCSTVIFDEDDDLGSIADISETERASQVESAEQVEKPG  
RSETEVDVSQRNTIPLTLRMAATATAVGAAAAHAQLLADQEEREVEYLVSTLVEAQMKKLQRKMKHVEALNLMMEKQHG  
QMKDLEESLVAERMDVLQKMFSAAGVSRWKDHAPVKSQSSSV

>CcSWI3B |Locus\_ID=BC332\_13234 |Protein\_ID=PHU17539.1 |Protein\_len=511 |  
chr05:67777395-67780617 |strand= -  
MAESGEINPPAPKPNPETTSPPPPQTEPQTPLPHPPPPPPQPGSSQAKRPQQPESSPNPTTPSATESKDKDVTPTTAIS  
SRLAEPEFVYIPSYSRWFSWNSIHECEVRFLPEFFDGRSPSKNPKYKYCRNTIIRFRDNPTKKITFTEVRKTIVGDVG  
SIRKVFDFLETWGLINYTANTSKSLIKWEEKESKSASASASHNADANGTSTDCTVPKKRVCSSCKTICRIACFASDKYDL  
TLCARCYVSGDNRVGVNNSDFRRVEISEEAKTDWTDKETLLLLLEALLHYGDDWKKVAAHVGGSTKECVARFVKLPFGEQ  
FMGPLESTEVDSEPKSETMHPQSKRMRLTPLADASNIMAQAFLSALAGKEVAELAAHAVALTALSEIGAGITKGNLGS  
LGGAEGQESDGTNGYKGDIERAIVEARPQLEKEALDLERAVSDVAIETKEIEERIAHFEERDLQMEKEWQQLMQLKNLI  
FIDQLTLLLNKASAPKTGETIGEEVIDVKA

>CcSWI3C |Locus\_ID=BC332\_15732 |Protein\_ID=PHU14527.1 |Protein\_len=767 |  
chr06:172876490-172894856 |strand= -  
MKNQNDGDFEEDDEEEIEQQEMVDDLQNPNNSVDRSYTNSVVELVSESKERISEFPMVVRRAVTRPHSSVLNIVAIEK  
AGQSGESKQNGGVLENLSYGLQALSAPVDHALLSDERGEKSGSGSYVITPPQILPGRGVVKHYGSAGRIHVVPMAH  
DWFSPNTVHRLERQVVPHFHFGKSAEHTPEKYMCCRNCIVAKYMESPVKHLSDVDDCHGIVAGISADDVTRIARFLDHWGI  
INYCAVPPKDEAPKDGTYLYEDSNNDICVPVAGLKSIDSLVQFDKPKCRLKAKDIPELVRCDDSDFDNSIREVLSEI  
KCNCSSRPVSLAYYQSKEIDILLCLDCFHEGRFVAGHSSLDVVKVSSMKDYGDLGDGSDWTDQETLLLLLEGMQRYKENWN

QIAEHVGTSKSAQCILHFVRLPLDGASLDNIELPGASGPSSSSTGEDPNKSHSILNGNLAGPSTENFHPDSKFPFENCN  
PVMSLVAFLESSVGRVAAACAHASLAALSKDDTLGARRNMTQMDGSTANNGTSVGRMPGKNGSPHGDVGNHQLKDEKS  
GGQGPHTDGGAPLSTVSVRAAAKAGLAAAIAKSKLFADHEEREIQRLSANIVNHQLKRLELKLKQFAEVETLLMKECEQL  
ERTRQRFTAERSRMISQPGSIRVSRPMGVSGAGAAVVSNAAGNSRQQQVVSAPQQQGFVSGYGNQQQMHPQMSFLQQQGM  
YFGPRLPLSAIHPSSTPGMFNASASSQPALSHSMLRPVSGTKSGLG

>CcSWI3D |Locus\_ID=BC332\_22454 |Protein\_ID=PHU10594.1 |Protein\_len=943 |  
chr08:191213095-191227220 |strand= +  
MEEKRKDTGTPPPPSADTPPISADAPSVPEPTSRRRGGGHRKASAIAGSGASSTPPSTLSKRQKQSAVPFPPIHNGPLTR  
ARQQPNHAAAAAAAAAGSPSGFGFTIESEVFPKAEAGVEEAVRVEKESNQVKEDLEALEAEIEAEIESIGSRDRNVHIVP  
THAGWFSWTKVHPLEKRTMPSPFFNEKLQSRTPETIYMEIRNWIMKKYHTNPNIQIELNDLSELSTGDLVDVKQEVMEFLDYW  
GLINYHFPFQTNSVMNVDIDGDKAARTDSLIDKLFRESDETWTVPVLRSSSVATPSVSSGFFPESAIAEELKSEGPAYEY  
HCNCSADCSRKRHYHCQEKEDFDLCSECFNNGKFGSGMSPSDFIVMEPGEVGSASGGKWTQETLLLLLEALELYKENWNE  
IAEHVATKTKAQCILHFIEMPIEDRFLDTDAESNKLVEKEDAVLSKDDTSASKDAPETTETKDDGNDQLSSTVETSKP  
ENVNGPIPQEEVGENCALNALRDAFTAVDFYPPPGERASFAEAGNPVMALAAFLVKLVAKKVSASVRSSLKISGNPSG  
EQLALRHCFILEDPPDDGKTSSSDRPANGSVDPEHKKDEDDNVEMQEEKLTSVIDEKSLSVGQDKETKGETNIDKKCEE  
RDGENHEEKNEKELEVATHLVSTSDKSQEKSDTSKQSGAISTDKEGESASLKEPDDAGLAVGQTPSTTAESNVLTSKLEV  
PPGFEEKESVDEASMAIPSNPDTPKDEDMPTVQTKPEQSMKSNIVLENGKNTGTVEVKDSVDGRKDPLKTKNDLIDK  
IKRAAVTALSAAVAKAYLADQEDQIRLLTTALIEKQLHKLESKITFFHDMDNVVMRVRELLERSKQRLVSRQQIINA  
RRAGQPVLANRPGMTLANSAPRLPTAMSSPRIPNSRPIMAGAPTPSSFMPTTVSGNSMQPSK

>CcRAP1 |Locus\_ID=BC332\_23251 |Protein\_ID=PHU06762.1 |Protein\_len=498 |  
chr09:23718032-23741314 |strand= +  
MNFYIFNNNIAGDNEEPNREKKRGRKSSKEIQEEIHQTSVINQAVRRQTCTIWTDDLHAKFMEAIHQLGEGRCYPKEIL  
EVMNVPLTRTQISSHLQCRSNSWRAPRKQKAICDSLSQASSSGTQQKNSFKNYGAMPRLPNLQCNLDQMERGSEFSFS  
VPNINNIFARGKSLTQQQLYHPQPQVQQAQNNVGGGLQOHGSPFGLLSQGLQGTIGNIYKPLTFNNSDHYTQSDY  
NLNLNAAHDTTYSSSGIMSNTIDAAINYNLKVNLDNVTTYSRSSMISNTGVANSTINELGAANANFQKNIGESNEHDD  
ELVQVHFDDQVRLNFLTTELQDQLASISSSGKSSYFEDKFILYSVRMLSFPIELRKDQLASISRSGESVVAHQIYKCL  
ITVLHKVMLADLIELDMVDFDLIIGMDCLQFYASIDCCTYVVKFQFLDEPVFKWSEDLLEVPPDREIEFGIDLLPDTQP  
TSIPPYYMAPTELKDLKE

>CcAPL1 |Locus\_ID=BC332\_07646 |Protein\_ID=PHU22539.1 |Protein\_len=382 |  
chr03:124758023-124764010 |strand= -  
MFHAKKPSTMNSHDRPMCQVQDGLVLTDPKPRLRWTVELHERFVDAVTQLGGPDKATPKTIMRVMGVKGLTLYHLKSH  
LQKFRLGKQPHKEFNDHSVKDGRATSLELQRNSASSSGMIGRNMNMQMEVQRRLEHQLVQRHLQLRIEAQGKYMOTI  
LEKACQTLGGEENMALPARTFKGIGNQGGLIPDISAAFKEFGTPPLSFSSFDLNICGGHDQQLHAQSSMGERSSSFD  
GFMNLGNTTDHNLTLGKKRPSYSSNGGNSNGKSPFMWSDDFRLQELGVATAAALGPNNEDDHQIIQMERSCNPELDSVS  
DLYESKPILQEEKKCDALKERPSPRRAAQISSLSAQGGRSSVFGELLSWQDGKVTGGERRE

>CcAPL2 |Locus\_ID=BC332\_15958 |Protein\_ID=PHU14753.1 |Protein\_len=233 |  
chr06:195054353-195056773 |strand= +  
MYENDGVVMTDRPKPRLRWTAEHLHQFVDAVTQLGGPDKATPKSVLRMLGLKGLTLYHLKSHLQKYRLGQLAKKQNAAEA  
NKENCDSGQFSLHSSGPSTSSLSMNFMQGEVVPVADAVMCQIEVQKRLQEQLVQVQKLQMRIEAQGKYLQAILDKAQKK  
LPNMNPSAPEATTAQLTAFSSPLSNLLDYTVHGENRDNNIELLTPNHIVEKEQKNDMNSINFDLNSRSSFV

>CcAPL3 |Locus\_ID=BC332\_00901 |Protein\_ID=PHU28808.1 |Protein\_len=152 |  
chr01:23679239-23682102 |strand= -  
MDRMYNGGGDGYENGVMTRDPKPRLRWTADLHDFVDAVTQLGGPDKATPKSVLRMLGLKGLTLYHLKSHLQKYRLGQ  
AKKQNAAEQNRENIAAESFGQFSLHSSGPSITSSSMNGMQGEAPISEQLWCQFEVQKRLQEQLVQVQKLQMR

>CcAPL4 |Locus\_ID=BC332\_31366 |Protein\_ID=PHU01579.1 |Protein\_len=291 |  
chr12:222554639-222561207 |strand= -  
MYSGLGMERNNGMGEYHNHFFHNLQSSITGEMNNLVGDACLVLTAHPRRLRWTAEHLHERFVDAVTQLGGPDKATPKTI  
MKAMGVKGLTLYHLKSHLQKYRIGKQSKEAAENYKDESCMAESQDTSSTASGSSKVVAQDINDCGYQVTEACRVQMEVQR  
RLQEQLVQHVVQLRIEAQGKYLQITILEKACKALNYTALESPELDTAREQLSELAIKGANANNC DGIVAVSSLPEVVTSF  
ENQNASDMPATSLVSPTSIGVLKKRPRPLANGDALPVEDNMTPVQWMMTNS

>CcAPL5 |Locus\_ID=BC332\_06463 |Protein\_ID=PHU21356.1 |Protein\_len=292 |  
chr03:5912615-5918150 |strand= +  
MYSTLPIRSLGIEESGDFNLQGLSVDGTNLPDSCVVLSTDPKPRLRWTTELHERFVDAVTQLGGPDKATPKTIMRTM  
GVKGLTLYHLKSHLQKYRMGKQSAKEGTENSKDVSCPAESQDTGSSTSGSSRVIAQDINEGLQVTEALRVQMEVQRRLE  
HQLVQRRQLQFRIEAQGKYLQSIKACKAFNSQSLESNGLEMNGEDLPALATKVANDCEGIITVPSLPEIGSSIENRNAC

HLPARLGDCMLDDCLPSNGIGALKKRPRRAFTNANGLPMESNTREVIEWMMSNI

>CcAPL6 |Locus\_ID=BC332\_12550 |Protein\_ID=PHU16855.1 |Protein\_len=323 |  
chr05:6131998-6137151 |strand= -  
MYPRLIQSGQEDEYIQHHGCDVNVVGIIHQVRVNGGDPCLVLTSDPKPRLRWTADLHERFVDAVTQLGGPSKATPKAIMRT  
MGVKGLTLFHLKSHLQKYRLGKQSKDLDEASKDGLTATYSLESPCSGGTPQQLPASDLNEGFEVKEALRAQMEVQSKLH  
LQVEAEKHLQIRQDAEQRYITMLEKACKMLADQFIGDVVTENHQETYQGLGKTQLSPLCNPNGLCPSDSADLIGVHGPE  
EVSPRIHPQRTDCSTESCLTSHESPAGLPLEGSSPGGKKRGLSGDSTHASYVWGEADMRSSGVHAIQVNCFGITGSNVQN  
VSN

>CcDIV1 |Locus\_ID=BC332\_32995 |Protein\_ID=PHT98081.1 |Protein\_len=256 |  
scaffolds:171231-173554 |strand= -  
MWIESYYQNTSLNSSAKTSLFYIQTKKKITKSTMMYTTNNRWMIGDAANNSTAMIQSNSTWTRFEDKQFEQALVLYSEN  
DVERWQKIANHVPGRTVEDVMMHYDTLVHDVFEIDSGRVEPPSPYDDDDGGFGGDWDELDDGGKLSQISFGGGASKKQEVER  
KKGTPWTEEEHRLFLIGLDKYGKGDWRSISRNVVTRTPTQVASHAQKYLRQSMKKERKRSSIHDITTAVDTKMVPPQ  
NSLQNQGAYQNFNFP

>CcDIV10-1 |Locus\_ID=BC332\_15633 |Protein\_ID=PHU14428.1 |Protein\_len=398 |  
chr06:157986961-157989623 |strand= -  
MSTDQICNSTFWTKEEEKVFETTLAIYFKGGDLLTKMEEALPCKSRDDIINHYKILIEDVDAIESGRVPLPNYPELPSSHS  
NQKSFRPKTNLARRKGVAVTVEEHRSFLRGLAIYGRGDWRSIARNCVITRTSMQVASHAQKYFNRLKAVNKENRRMSIHD  
ITIVDAEVAGTSQVPYTEGMIWPACGGSQAVACTSNQNMLPPESTNAEQMIAVAGGESSGHTAAFSGMNSMSDEDDFIL  
HIDDLIVDPEDANESEILVDGGKSLPSKQPCTAGSSGSNNHPIFRVGSSELGALITQMDEDDYDFFSIFDDGDAPISHAM  
VSNAAHSGMTSFAVASNSANNPPQNTVSAHSGRTSFAAASGPNKAPLMVSDHPQLPHVAPSSNCVVGEWLQFKYYH

>CcDIV10-2 |Locus\_ID=BC332\_15631 |Protein\_ID=PHU14426.1 |Protein\_len=400 |  
chr06:157957125-157959752 |strand= -  
MSTDRTCNSSFWTKEEDKIFETTLAIYFKGGDLLTKMEEALPWKSSDDIINHYKILIEDVEAIEFGRVPLPNYPELPSSHS  
NQKNRSSKTDLAWRKGVAVTVEEHRSFLRGLAIYGRGDWRSISRHCVITRTSTQVASHAQKYFNHLKAVNKENRRMSIHD  
VTIVGADIAGTSQVPYTEGMILPACGGSQVFASTSNQSLLPQESTNAEQMLAVVGGESSGHSAAVSGMNSMDPDEDDF  
IKHIDDLIVDPEDANESEFLVDGGRSLLASKQPCTAGSSGTNNHPIFIVGSDLEALITQMNEDDYDFTFILDDGEAPISH  
AMLSNASHSGMASFAVASNNAYNPPQNTVSAHSRMTSFAAASIGPNAPQNMVAHPQSPHVAPSSNCVVGEPQFKYYN

>CcDIV11 |Locus\_ID=BC332\_16553 |Protein\_ID=PHU15348.1 |Protein\_len=126 |  
chr06:220155838-220156795 |strand= -  
MVPNKTIDELKQHYQLLVDDVTAIEYGYVPIPNYTVEENSYGYSRVRDDWQSNNEFAETAQCPERRKGTPTWTKEEHRL  
FLLGLERYGKGDWRSISRNVISRTPSQVASHAQKYFNRLKKNQHP

>CcDIV13-1 |Locus\_ID=BC332\_23075 |Protein\_ID=PHU06586.1 |Protein\_len=348 |  
chr09:10863883-10868697 |strand= -  
MVAHRGEPLIDNWLGLQRDAGLSRRSTRIGQLSFWHPPRHGNRRDSLEITEGREEEQIDTVYVDLAAERKVDIKGPK  
DDTKSTFHSNTGSEIEHLSVGLSDYEGEGFDFYEKYITDNTCLAAVDSVYQPDYIGCFCDIMNLIRFLNPLQELTLFML  
EPFLVCQKEMRTDRTCNSSFRTLRRMEEELPGKSGDDIINYNNILLEDVEAIDSGRVPIPNYPELQISISNQNSEADVERQ  
RGASWTELEHRSFLRGLDKYGRGDWKSISRYCVITRTPTQVASHSQYFKHLKAVPKKNRRASILDITSADAEAAAGTSQA  
MPSTNNESIFLRQSTNAEQIIAVAGGVA

>CcDIV13-2 |Locus\_ID=BC332\_23074 |Protein\_ID=PHU06585.1 |Protein\_len=429 |  
chr09:10846220-10847970 |strand= -  
MLKLIRFLNPLQELSLFMFESFLVDPKKMSTDRTCNSSFWTKDEDKVLENTLAIYSDDKDLFTKMEEALPGKSRDDIINH  
YNILIEDVEAIDSGRVPLPNYLELQSDSNQNSRADVEWRRGASWTELEHRSFLRGLDKYGRGDWKSISRNCVITRTPTQV  
ASHAQKYFKRLQAVPKEKRRASILNITSADAEAAAGTSQAVPSTKNEIMLPRESINAEQTIAAEGESSGHDVAVFVNGMDS  
LNPDRNGEFIFSIDDIIMEEEDVNETGFLVDAGRSLPREQPCAAASTGAYGHPITRIGSDLEALLTEPREEDNDINSIF  
VVRKAPTSHEVLLNAAHSGISSYAAASFGAENAPESNVAAYSGMSSYADASSDAVNAPDNMVAHSGMTNFAVTSRFASN  
APQDTVAHAHASQLPPFSLSSNFDVGDAPM

>CcDIV14 |Locus\_ID=BC332\_14807 |Protein\_ID=PHU13602.1 |Protein\_len=218 |  
chr06:9374951-9376248 |strand= +  
MENSPENNDVFIVSDDDGHDQHHLVQQEDNHRPCRRRGTPWTKNEHQLFLMGLNRFKRGDWKSISRYYVVSKTPTQVAS  
HAQKYFSRQDSKTPVERRRPSINDIQTVSLNLKTTSTITMGATYLINNNRFAYNNNHQAASSSIHFHYPSYTFSGPTFSN  
NFNENFEISHLGETSGSNSSVMGKNNNNKFNLLNRPVSPRPFLSTYLSSIRNDPQI

>CcDIV2 |Locus\_ID=BC332\_07426 |Protein\_ID=PHU22319.1 |Protein\_len=292 |

chr03:73180846-73182030 |strand= +  
METLFSSNSFLPNSSWMSKSIIEWTKEENKQFESAIAIYDENTPNRWFKVAAHIPGKTVIDVMNQYKELVADVCDIEAGLV  
PNPGYFGSSITLEFVDHCGLQTFRKRGRSSDQERKKGVPWTEEEHRRFLMGLEKYGKGWDRNISKMMVISRTPTQVASH  
AQKYYQRQISGGKDKRRPSIHDITTVHFTTDATSQNNLAYNINSLSKEKFYATSSSFQKFTTTTIDIVNCWNASLLSEHVD  
LMDFGSLYGSSPFVAYPYKIASQYWDEHGANSITLSGNPQLQLQSTRYQIWD

>CcDIV3 |Locus\_ID=BC332\_13887 |Protein\_ID=PHU18192.1 |Protein\_len=242 |  
chr05:217772836-217773933 |strand= -  
METLCPTSFVPNSNWTMQQSKSTTEWTKEENKKFESALAIYDETTNPNRWSKVAEIIIPGKSVLDVMMQYKELVADVSDIEA  
GLVPNPRRFVSSFALEFADHRKIHTFSKRGSYDQERKKGVPWTEEEHRRFLMGLEKYGKGWDRNISRNFVISKTPTQVA  
SHAQYYLRQLSGEKERKRPSIHDITTVNLTNNELNNNNKLMCEVKSYSPLQRSTSPADVLIGCWNNNSFDGDLMAFGQ  
FV

>CcDIV4 |Locus\_ID=BC332\_23536 |Protein\_ID=PHU07047.1 |Protein\_len=293 |  
chr09:70770343-70772002 |strand= -  
MNSEMGFLSPATYIKNSSWLFEENKGTWTPPEENKVFEALALFDKDTDPKWYNVAAMIPGKTVDVIKQYRELVDISD  
IEAGLIPVPGYTTNSFTLEWVNNQDGFHGFQFYGPSGKRGSSNRSEHERKKGVPWTEEEHRQFLGLKKYKGKDWDRN  
ISRNFVTTTRPTQVASHAQKYFIRQLSGGKDKRRSSIHDITTVNLTESKSTSPEDHKSAPTPQAQHSQMNGMVKTLCEY  
NSPNQESDITFNSSSGGLITMPFRGAPSYELEHGMHNIALQGLQFGNYNTMC

>CcDIV5 |Locus\_ID=BC332\_17375 |Protein\_ID=PHU16170.1 |Protein\_len=306 |  
chr06:244172554-244173998 |strand= -  
MEILSPAPYLANPSWFLDEGKSTKWTPAENKAFENALALFDKDTDPDRWQVAEMVPGKSVGDVIRQYKELEDDVSRIEAG  
LITIPGYSTSPFTLEWGNHSFDGYKQTYVVGKRPLSSRPPEQERKKGIPWTEEEHKLFLMGLKKYKGKDWDRNISRNFV  
VTRTPTQVASHAQKYFIRQLSGGKDKRRASIHDITVINLHDNQTSSPDYQKPTSPDQPAVISQPKSAANAVHKMPFQWN  
QANNGTAMGFNSAQGSLFMSPLYGVNSYGNMKMSQSLQRGALHEPYFGSQSMNFQLQSAHQYHQA

>CcDIV6-1 |Locus\_ID=BC332\_28756 |Protein\_ID=PHU03505.1 |Protein\_len=361 |  
chr11:235909003-235910919 |strand= +  
MSLDRTCKRSSWTKEENKAFENALADYSGDRDLIQIAAAVPGKSLEEVIEHYLVLEDIKDIESGIVPLPKYRRMQSST  
ERRKGIPWTAEEHRLFLQGLAKYKGKDWRAISRNFVLSRTPTQVASHAQKFYTRLNDKNNPKKRRSIHDVTSANITEPS  
QGPGCGRLQWPITNYVTDADFNTGMLSIPEPVTTTRISTDAIEGASAADLEKIPLGAAVGNELNSSFPGMVEFVQSIEGHII  
VPAEVPSGVCHGVDTKTSPSHSLQPSIAVGSGMYIPSFNNVRYDLTALMSKQLFGSSQVGPTVNSASLPLPTIDRIGVQD  
CIASPSIPGSSSGGTYPWCWPNPSNIDDNTFDLVNLPDGLGK

>CcDIV6-2 |Locus\_ID=BC332\_28750 |Protein\_ID=PHU03499.1 |Protein\_len=192 |  
chr11:235389942-235391479 |strand= +  
MSLDRTYKSSTLTKEEDKAFENALADYSGDGLIQIAAAVPGNLLQKFSNIILLFLQGLEKYKGKDWDRDISRSFGLSRT  
PTQVASHAQKFYTRLNDNNPKKRRSIHDVTSAAIIEPSQGPGGQLQRPITNYVTDADFNTGMLSIPEPVTTTRISTDAI  
EGASADDLEKIPLGAAVGNELNSSFPGMVEYV

>CcDIV7 |Locus\_ID=BC332\_14309 |Protein\_ID=PHU18614.1 |Protein\_len=189 |  
chr05:233225693-233228706 |strand= +  
MSIWSRNDKLFENALVLYPENIADRFQLIADYVPGKSIDDIMAHYDDLVDHVFIDSGRIEFPGYTDDDSGLEGHSGRV  
ELEGDSGRVSAERKKGTPWTEEEHRLFLIGLEKYGKGWRSISRNVVVSRTPTQVASHAQKYFIRQAMKKERKRSSIHD  
ITTAVDNTNTVPPQSSLQNRGTQNFNAQ

>CcDIV8 |Locus\_ID=BC332\_25861 |Protein\_ID=PHU05039.1 |Protein\_len=282 |  
chr10:167370402-167371420 |strand= -  
MNSEMELFSPQATYLRNSNWLFEENKGTWTPPEENKMFEDALALFDKETPDRWYYVASMIPGKTVDVMMQYRELLEDI  
TDIEAGLIPIPGYTTSSNSFTLEWINQDHEEGIFHDFNKQFYGPSGKRSTSNRYSEHERKKGVPWTEEEHRQFLGLKKY  
KGKDWDRNISRNFVTTTRPTQVASHAQKYFIRQLSGGKDKRRSSIHDITTVNLTENKSPSPENHISSSPDKSVSPQKAL  
CEYNFPNQEAVIGFKTYGLKLHEHGMHSVILQGLQFGQYNTM

>CcDIV9 |Locus\_ID=BC332\_09843 |Protein\_ID=PHU24736.1 |Protein\_len=290 |  
chr03:273459958-273460973 |strand= -  
MSPSDWSREEEKAFENAIAMHWVENCEQQWEKFLMVPTKTIDELKQHYQLLVDDVTAIEAGQVPIPNYKGEEASSSSTK  
EGLNGYSAGSVDRRSNCGYSNGFSGTNHDPIGHGGKGNRSERQERRKGIPWTEEEHRLFLGLEKFGKGWDRSISRNFVI  
SRTPTQVASHAQKYFIRLNSMNRDRRRSSIHDITSINNGDVSTHQAPITGQQVNTNPSNAAALGPSVKHRTQPNMHGMGM  
YGAPMGHPVAAPSSHMASAVGTPVMMPHGHPYVLPVAYPIPPPPPPMHQ

>CcEFM1 |Locus\_ID=BC332\_24443 |Protein\_ID=PHU07954.1 |Protein\_len=440 |

chr09:249856060-249859054 |strand= +  
MNMTSSNSELSLECKPHQSYSMLLKSFGEKIDQTQNLEEFARLEEERVKIDAFKRELPLCMQLLTNAMEASRQQLQSHR  
ENNHIGHRPILEEFIPKNNNNASVELGAEKIVANNTSTIVDNKANWMTSAQLWSPSDHQETKQIQTSNNTSNKENDHH  
IGFSISPKLALDNNSSCPSPTTLALASSNKQNESTIVEDHNKNLEGVNIQQDSQSIGGGTNTSTSTQQQQPHRKARRCW  
SPDLHRRFVNALQMLGGSQVATPKQIRELMKVDGLTNDEVKSHLQKYRLHTRRSPSPQATTAPPHLVVLGGIWWPPEYA  
AAAATHGGAPPAATFYGPHSTSHAPSPHYIAAPQAVTQEFYSTPQPLQSLHHLQHHQQMYHHGSHMYKPPSKSHSHSSPE  
SDARGTGQHGRSSESIEDGKSESCSSENGGERKVVVHKF

>CcEFM2 |Locus\_ID=BC332\_27315 |Protein\_ID=PHU02064.1 |Protein\_len=402 |  
chr11:6571024-6574499 |strand= +  
MMINNNNFNEKMQRCCQYIDALEEERRKIQVFSRELPLCLELVTQAIETYKQQLSGTTTEYNLNAQSDLECTDDDEHTSSD  
VPILEEFIPLKRTFSHEYEDQEDAHDEENESHKSKNNNSNNSTISKDNKSNTKSDWLRVQLWNQTSPTLKEVINFYF  
LTFNLFLFFLFFFIFKISRNIFFCDYPILGIYLSMYVIIQLSLALVRLEENKEEKDGQRKQRRCWSPELHRRFLQALQQL  
GGSHVATPKQIRELMKVDGLTNDEVKSHLQKYRLHTRRSPSSIHNNNNQPPQFVVVGGIWWPPPDYASMAAVAPAASG  
EASGVANSNGIYAPIATHAKGPLHDHASLGGTLKQLRQHQNEKPSRSSERDGSLSHSEGGGVHSSSPATSSSTHTTTASP  
AY

>CcEFM3 |Locus\_ID=BC332\_22367 |Protein\_ID=PHU10507.1 |Protein\_len=407 |  
chr08:189597824-189600185 |strand= -  
MGSIPPELSLDCRPSFVPESVTDFLRKVSLIRHIPDKLAQIDDIYISRLDDEMCKIEAFKRELPLSVLLVKDAIGTLREES  
MQYRKSKEPVLLEFIPLKSLDEDTKAEITAKDKDSREKMSWSSVQLWNSESHCEKTDEVNNKQPSKSELKVDTRKSL  
EEEGHSSITEDPFRSYKTMNVGKAFSPFKGFSVAVRKDNKDELPGVTGLSLHTPGIAKLREDTVTSGLSKNHNGSRGGL  
SSAAGCQSNIRTGSLAQQSARKQRRCWSPELHRRFVDALQQLGGSQVATPKQIRELMQVDGLTNDEVKSHLQKYRLHTR  
RVPNSQTQPANKSGVALGNLWMSQGQYVESSKRSSSQSGSPGPLHLAVSCGGTSTTVGDSMEEEDDLKSENHWSKNHVVH  
TSGKIDV

>CcETC3 |Locus\_ID=BC332\_24253 |Protein\_ID=PHU07764.1 |Protein\_len=86 |  
chr09:236821040-236823376 |strand= +  
MQGKAAYDTHLCGVFPVQKESLGVTAFEAANNEETSKLEFSEDEEFLVTMKNLVRWLSLIAGRIPGRTAEEIEKYWNS  
RNSTSQ

>CcGLK1-1 |Locus\_ID=BC332\_34438 |Protein\_ID=PHT96636.1 |Protein\_len=447 |  
scaffolds:1797-5550 |strand= -  
MLAVSPLSNTTARDDNTMESFAIGGGVDFPDFVGENLLDSIDFDDLFGINDGEVLPDLEMDTEILAEFSVSSGDESVDN  
NYSSSNKTTTIFISTATKNVERKDETERAASDVGSGLTSLNQGEEIVSTQKSEESTLQVKQNTPKESDKGKKSSKNNLPGK  
RKVKVDWTPELHRRFVQAVEQLGVDKAVPSRILEIMGIDCLTRHNIASHLQKYRSHRKHLAREAEASWSQRRQLYGA  
AVVGGGGGKRDMPWPAPTIGFPPPTMAAPMPHFRPLHVWGHPSVDQSYMHWPKHLAPSPSPQHPSPAWAPPHLHP  
PPSPDPSFWHPHHQRPVNPLTPGTPYFPAPIAPTRYPGGHHVPVGPPIAAHAMYKVDHVRSTAPPTQPLPKPPCDFHPSK  
ESIDAAIGDVLSPWLPLPLGLKPPAVDSVLGELQRQGVKIPPTCA

>CcGLK1-2 |Locus\_ID=BC332\_34411 |Protein\_ID=PHT96663.1 |Protein\_len=447 |  
scaffolds:2358-6111 |strand= -  
MLAVSPLSNTTARDDNTMESFAIGGGVDFPDFVGENLLDSIDFDDLFGINDGEVLPDLEMDTEILAEFSVSSGDESVDN  
NYSSSNKTTTIFISTATKNVERKDETERAASDVGSGLTSLNQGEEIVSTQKSEESTLQVKQNTPKESDKGKKSSKNNLPGK  
RKVKVDWTPELHRRFVQAVEQLGVDKAVPSRILEIMGIDCLTRHNIASHLQKYRSHRKHLAREAEASWSQRRQLYGA  
AVVGGGGGKRDMPWPAPTIGFPPPTMAAPMPHFRPLHVWGHPSVDQSYMHWPKHLAPSPSPQHPSPAWAPPHLHP  
PPSPDPSFWHPHHQRPVNPLTPGTPYFPAPIAPTRYPGGHHVPVGPPIAAHAMYKVDHVRSTAPPTQPLPKPPCDFHPSK  
ESIDAAIGDVLSPWLPLPLGLKPPAVDSVLGELQRQGVKIPPTCA

>CcGLK1-3 |Locus\_ID=BC332\_34315 |Protein\_ID=PHT96759.1 |Protein\_len=447 |  
scaffolds:1284-5037 |strand= +  
MLAVSPLSNTTARDDNTMESFAIGGGVDFPDFVGENLLDSIDFDDLFGINDGEVLPDLEMDTEILAEFSVSSGDESVDN  
NYSSSNKTTTIFISTATKNVERKDETERAASDVGSGLTSLNQGEEIVSTQKSEESTLQVKQNTPKESDKGKKSSKNNLPGK  
RKVKVDWTPELHRRFVQAVEQLGVDKAVPSRILEIMGIDCLTRHNIASHLQKYRSHRKHLAREAEASWSQRRQLYGA  
AVVGGGGGKRDMPWPAPTIGFPPPTMAAPMPHFRPLHVWGHPSVDQSYMHWPKHLAPSPSPQHPSPAWAPPHLHP  
PPSPDPSFWHPHHQRPVNPLTPGTPYFPAPIAPTRYPGGHHVPVGPPIAAHAMYKVDHVRSTAPPTQPLPKPPCDFHPSK  
ESIDAAIGDVLSPWLPLPLGLKPPAVDSVLGELQRQGVKIPPTCA

>CcGLK1-4 |Locus\_ID=BC332\_34226 |Protein\_ID=PHT96848.1 |Protein\_len=447 |  
scaffolds:34599-38352 |strand= +  
MLAVSPLSNTTARDDNTMESFAIGGGVDFPDFVGENLLDSIDFDDLFGINDGEVLPDLEMDTEILAEFSVSSGDESVDN  
NYSSSNKTTTIFISTATKNVERKDETERAASDVGSGLTSLNQGEEIVSTQKSEESTLQVKQNTPKESDKGKKSSKNNLPGK

RKVKVDWTPELHRRFVQAVEQLGVDKAVPSRILEIMGIDCLTRHNIASHLQKYRSHRKHLLAREAEASWSQRRQLYGGA  
AVVGGGGGKRDMTPWPAPTIGFPPPTMAAPMPHFRPLHVWGHPSVDQSYMHWPKHLAPSPSPQHPSPAWAPPHLHP  
PPSPDPSFWHPHHQVRPNPLTPGTPYFPAPIATRYPGGHHVPVGPPIPAAHAMYKVDHVRSTAPPTQPLPKPPCDFHPSK  
ESIDAAIGDVLSPWLPLPLGLKPPAVDSVLGELQRQGVKIPPTCA

>CcCLK2 |Locus\_ID=BC332\_25081 |Protein\_ID=PHU04259.1 |Protein\_len=311 |  
chr10:6978367-6984249 |strand= -  
MLVVSTPLSYKNERGNYDLFQDFPDGNIIDTIDFDDFFEGINDGDLQNLKILDEFDISKNNTTTNLNVKTKSKENDKSK  
KSSSQIKNPEGKKKVKVDWTPELHRRFVKAVEKLGVDKAVPSRILEMATDGLTRHHIASHLQKYRAHRKHLLAREAEAA  
SWTQRKQMYGGATAIGGGGKRVIMNPWSAPPTMGFPMAHHIRPLHVWGHYPVNNFSFWHPHYRVPNSLAPGTPCFPSPTR  
FAAPLMVPGVPPPIASGQTPHLHLTKESIDAAIEDVLSPKQTPPLPIGLKPPSIDSVLNELQCQGITKIPPT

>CcHH01 |Locus\_ID=BC332\_05708 |Protein\_ID=PHU27376.1 |Protein\_len=449 |  
chr02:161961278-161965535 |strand= -  
MGSNSREMDIDLNFYVPKIISDVLTEISVMDDISKKLILKNQFIIALEEELRKIEAFKPIERLKEEALQYKGKDKKPPVM  
EKFISLKKGNSDESGRVKKSNDLNDKKNWMSSAQLWSTPVQYEQSYDLEKQGPFLHLNSGGVEEKNKEKEYQLGVHKLNS  
DRGAFLPFQGGTLKDGKNGLPVKDLSLCMAVTVAEGQKGQNPIDLSVKNDNGTSNGCSFLQDKSQQRKQRRCSPELHRR  
FVDALHQLGGAQVATPKQIRDIMQVDGLTNDEVKSHLQKYRLHVRVPVSGCSWSNTDEIGESSKTNGTQSGSPEGPLHF  
TSGSKMTSDSQMQDAATSMGATNIATSSRTNAPPTMALTEKPEKFTGIDFKRWQKMFFYLTTLCLQRFTSEDAPEVPEG  
TSDKERFVIVEAWKHSNFLCRNYILSGLQDDLYNFYSGTKTSKELWGGT

>CcKAN1 |Locus\_ID=BC332\_00869 |Protein\_ID=PHU28776.1 |Protein\_len=290 |  
chr01:22734254-22738844 |strand= -  
MELFPAQPDLSLKISPPNIKPSSSSTNWKRTTSTEDENLDLGFWKRAMVESTNSMLNNSNTSSCFELSLSNNPTKPN  
NYSCDPNSSHHLQNYILQQNQRIITTRELGLMQPIRGIPVYHQKPFNTITTFPIPSSSNCSILNINNNTTITSCAST  
SPNFQGGFLRSFYRFPGRSTRAPRMRWTSTLHARFVHAVELLGGERATPKSVLELMDVKDLTLAHVKSHLQMYRT  
VKTTDRAASSGQSDTSEELIVETEEYLRKSEITIQGRRNIHQNNDFQGL

>CcKAN2 |Locus\_ID=BC332\_15978 |Protein\_ID=PHU14773.1 |Protein\_len=418 |  
chr06:195859709-195865647 |strand= +  
MELFPAQPDLSLQISPPNSKASSTAWKSSMVTNNTNSTTNQDEMDLLFWKRALESRNSKSDNNSNNSL FELSLSNIPN  
KPSPPHQLINTTSHFHPTIQNTHTNFIHQSLQQNQELSFLRPIRGIPVYHQNPPLPSPSIPVSHHNYPIFAHQTFDNTS  
TTAATLPIHSSGCCISSFNNNISNKTISNSSPIIPFHQSHHQAGLMRSRFLSRFPAKRTMRAPRMRWTSSLHARFVHAVE  
LLGGERATPKSVLELMDVKDLTLAHVKSHLQMYRTVKTTDRAAVPASSGQSEVFDNGSSGDNSDLMPPDMENSRKSADL  
LSDQHAGRNMHLQEKDYHGLWSNSSSRESWQLHGKHGDYPGNMAPLERTEKNQHKDMEANAKCLSYDRISGEVSSSSIT  
ETSPKKPNLEFTLGRPSE

>CcKAN3 |Locus\_ID=BC332\_11999 |Protein\_ID=PHU20848.1 |Protein\_len=307 |  
chr04:226904350-226907883 |strand= -  
MRDITVLSMPDLSLQISLPPCISKSDQFKEAIRFDSTTDSGSSASVGSLSHENNGYFHLDKIKPFNLPLVPSYEPTLSL  
GFGQVPTGTNHQYQHYQPQIYGRDFKRSSRMNISGVKRTARAPRMRWTSTLHAHFVHAVQLLGGERATPKSVLELMNVK  
DLTLAHVKSHLQMYRTVKSTDKATAKGQGENVFVNQHKGINNIGEYKSGEEDAVSQSSTMPQNMAMHNRDPSSFMPDQ  
TNAWSHSNRERPFANYPHIYSNMGGIETANNSSSNDTLVNLEFTLGRPSWKMEQAGSSSNDLTLLKC

>CcKAN5 |Locus\_ID=BC332\_19106 |Protein\_ID=PHU12176.1 |Protein\_len=111 |  
chr07:193411405-193412184 |strand= +  
MPESKHKHGETSEKVGPSHDLNRKPRFKWTVLHEHFVKAVNELGGPYEATPKNIVKLMDDEDITPDHIKSHLQIYQGR  
SRSIKVQGVSCHPQVLKARGALCHPQVSID

>CcKAN6 |Locus\_ID=BC332\_18917 |Protein\_ID=PHU11987.1 |Protein\_len=250 |  
chr07:174661694-174670007 |strand= +  
MMEYFSMMKKRSSNKIGVRQYKSSVPRLRWTPELHELFIQVALLGGGHKATPKRIQQMMEVKGLTISHVKSHLQMYRN  
LKERASPNIVSSVNNFLEERPQFSWSSPRHVCETLEHRPSKSSNQINPGSDQSPYKARVDAHSDQIAENNIYCCDYQEAQ  
GSLSSGMTKEEEEESGGPTSEICEFPEADGDYKRENNIWLDDWVARCTKGS AEYSQSDSSTKFLDQQVLQSPKDNHINL  
DLSSISYFYC

>CcKUA1 |Locus\_ID=BC332\_00616 |Protein\_ID=PHU28523.1 |Protein\_len=343 |  
chr01:12399830-12402577 |strand= -  
MTRRCSHCSTNGHNSRTCNRGVKLFQVRLTDGLIRKSASMGNLTHFGGGGGGGGSSSTGLNGVVHDSPGDTPDHFAVGG  
AAADGYGSEDFVAGSSSSRERKKGVWTEEEHRMFLGLQLKGKGDWRGIARNYVITRTPQVASHAQKYFIRQSNMSRR  
KRRSSLFDIVADESGDTPMVSRDFLAEDPQAEQSNPLPPTPVVDEECESMGAASANSIDGHSPLPIESSQYPHPLV  
YPAYVAPFFPMPYPCWPGYTAEPKAETHVLKPTAVHSKSPINVDELVGMSKLSLGESIGNAKPPSLSLKLVEGSSRQS

# AFHANPSSGSSGMNSSHSPIHAV

>CcKUA2 |Locus\_ID=BC332\_30669 |Protein\_ID=PHU00882.1 |Protein\_len=380 |chr12:150869443-150880452 |strand= +  
MTRRCSHCNNGHNSRTCPTRGGGGATSSIGGSAIGGGVRLFGVRLTDGSIKKASMGNLSSLHYHSSSSAAASPN  
HPGSPSSDVLREAVHLDGYSDDPVHASCSANRRIERKKGVPTWEEHRLFLIGLQKLKGKDWGRISRNFTVSRPTQV  
ASHAQKYFIRQSSATRRKRRSSLDIVADTAADASHPLPDEQFMLPPRAMESDKEQLAPSATKAIETDFADSLPSLDLSL  
KPDFESMETVPSEPVQETKPNATSEIPPAFFPAYIPVPYFWPSNAIPVPEDRGPEPSHHQILKPIPTVPKEPVNV  
DELVGMSQLTLAEAGSGHFEPSPSLSLKLTAEPSRQSAFHASTPGKSSEITKGETAPIQAL

>CcKUA3 |Locus\_ID=BC332\_24632 |Protein\_ID=PHU08143.1 |Protein\_len=240 |chr09:255398691-255401598 |strand= -  
MGRKCSHCGYIGHNSRTCSTLKCAISGSNFIGGLKLFQVQDNTANSSSSSSSSSSSFSSHNLTKSFLDCLSLTNSHIGHS  
HLSSSLSPSPSINESCEKSTTSINNGYLSDGIGVGCVERKKGAPWTEDEHRKFLIGLEKLKGKDWGRISRNFTVTRTP  
TQVASHAQKYFLRQSSINKKKRRSSLDIMARINNKFCQENSHWIYGSQNSHHNEVPNNKSISSNGNIDLELSLNNIV

>CcKUA4 |Locus\_ID=BC332\_15336 |Protein\_ID=PHU14131.1 |Protein\_len=275 |chr06:105233532-105235753 |strand= +  
MGSMTKDARKCSHCHNSRTCNSKGVGGIKLFGVRIDDNYNSNSNNNNHGHGNIKIKMRKIGDYESIRRSKSLGNLEHAA  
NYDNIGGVEAGYLSGPIHSLRHRKGTSTWEEHRCFLIGLEKLKGKDWGRISKHYVPSRTPTQVASHAQKYFIRMSSI  
DKKKRRPSVFDVYLKDLNPQIPSKSSPSVSNMVSEVSKDASSRVVQLFDTCQIKGQASKGVPCATRERPLSPSPISRPF  
GVRNLRHMPYMMGAPPNIHSVTPAKAGPTISWILP

>CcMYB1R-1 |Locus\_ID=BC332\_32578 |Protein\_ID=PHT98499.1 |Protein\_len=281 |scaffolds:544828-545986 |strand= -  
MTITYGHSSFISAGELPPADVSGGEIMLFGVRVKLDPMRKSLSLNNLSQYEQPNSNDNNNSNGGNTNDSSSKVADEGYAS  
ADDAVPHHSGSRERKRGVPWTEGEHKLFLGLQKVGKDWGRISRNFTVTRTPQVASHAQKYFLRRTNLNRRRRRSSLD  
FDITDTSVSLPTEEAKNLQEAHVETSKINAFQVTSVPIKFAPLVLPQMDKPIESPIQSYNASSIYLRPVVVPVSNQ  
SSAIESSSLSLTLSSPSSSSSTRYQVMSNFSNGESIISVA

>CcMYB1R-2 |Locus\_ID=BC332\_16646 |Protein\_ID=PHU15441.1 |Protein\_len=295 |chr06:222007861-222009975 |strand= +  
MSSACGDESSATEVTGAGEIMLFGVRVKVDPMRKSLSLNNLSQYEQPNINNSGGDSKNESLKVAADDEGYASADDAVQHQS  
NCGRERKRGVPWTEEHKLFLGLQKVGKDWGRISRNFTVTRTPQVASHAQKYFLRRSNLNRNRRRSSLDITDTSVS  
AMPKVEGENKQEIPLAPATLPTVETTKTNAFPVAPTVPIMIPAQIDMSRDSPTLLRRNHGNSMMLVGAVPMFSLPNPS  
PVIDLNNANQNTTIEPSLSLRLSLSLDQGGASSTRHLGYQVMSSFSNGESIISVA

>CcMYBC1 |Locus\_ID=BC332\_26707 |Protein\_ID=PHU05885.1 |Protein\_len=274 |chr10:222673866-222674690 |strand= -  
MREEDSNWFAKWEEELPSKELMPLSQTLLITPSLAIAFHQNPNTPNPRMSPLVHTPPSAEFESNSAELGGRAGSSGVGP  
DEPARTPKRRLVWTPQLHGRFVDAVAQLGIKNAVPKTIMQLMSVDGLTRENVAHLQKYRLYLKRMQGFSSSSMSGAGV  
DPATDHLFASSPVAHFLHPGRGNSEHYMPFVPVAAIVGHAPQLQQQHRHLGPSPNGQFEVPFLSRQSQQQPVQRMGTSV  
HSSSPVLPSYVEGLESATTANGRKVLTLPFTGDD

>CcMYBC2 |Locus\_ID=BC332\_27055 |Protein\_ID=PHU06233.1 |Protein\_len=290 |chr10:233421662-233422534 |strand= -  
MREEDSNWFAKWEEELPKPEELMPLSQTLLITPDIAIAFDIPNPTSPNPQSKQQQTPLVPSSQPNSSAEFESAELNGTGGG  
DEPARTLKRRLVWTPQLHGRFVDAVAHLGIKNAVPKTIMQLMSVDGLTRENVAHLQKYRLYLKRMQGLSNGSGGSNA  
QSLSGAGVDPAMDNLFASSPVAHFLHPGRGNSDHFMPFVPVAPMQHHHMGVVVGHHPVQQYRQFGSPANGHFEHPF  
LSRQSQQQVQRMGTSVHNGSPVMSSYVEDVDSATAANGRKVLTLPFTGED

>CcMYBR1 |Locus\_ID=BC332\_13048 |Protein\_ID=PHU17353.1 |Protein\_len=300 |chr05:33253116-33257698 |strand= +  
MGNCGRNGGVRQYIRSKVPRLRWTPDLHHCFFVHAIEKLGGQDKATPKLVLMMDVRLTISHVKSHLQMYRSMKNDVNRQ  
AERMSTQQRKHQSLEDHCHYQKQEGVCVEQKLLVYQHYPSFSSSPMERSDSTQYFNSILPTKRARIEVCSNQRIEAV  
SNQYNSRNDYIEKNGVKGERAGFIWQQNSETNRQTAHPLCNSSSTTTLFFNPLKRSNEIQESEFFKVTKTQDSNAGGGGG  
GEDNGECGLSLSLHRPSTQRSNASSIISEIGETISSYSAGSNVNQSVSVDLNLIAL

>CcMYBR10 |Locus\_ID=BC332\_32618 |Protein\_ID=PHT98434.1 |Protein\_len=628 |scaffolds:119352-121238 |strand= -  
MDQGDEKEDMLRKLEKSKSKSNKNAATSGLGGESDGCEVKKKKKKRKGGEHPGKCNKDNDDEVVKYIERKKNNKLKKSCLN  
EPPLDFKISAPASASEMRDSEKVVETLGEISSGDVVDEIRRKKKSKKNIKTNNVVGAVNTDIEAKTDDCDLKRKKEKKHG

KHSEKFNEDSDEVALRIVEGKKSRLKKSRAVEQEKMHDTEDEVQEDIVADEVDEGDISSPIKIEEKNRTDNGNIKKRKKVK  
SGHSSSEDPHEIEEKSRDNGNIKKRKKVKS GHSSSEDPHEIEEENRTDNGNIKKKKKKVKS GHSSSEDPHEKS AKKVRFS  
GHVQIFPSSDDPSDEKHEIEDENLLRGKRFSKLEDEIVKEAVHKYVDFHNLGEEGLKKILNSRSYPEIRGCWKEIGSAIP  
YRPYTAVYYRAQILFRRSESRKWTEEEYEIVRKFKQEHGNNWKVLADELGKHRFHVKDTRRIKRPNQNGQWTQEEYQS  
LFDLVNTDLRLRLSEEKRSKYGMLRDNIAWTAISDKLSTRTEANCLKWYDQLTSPMVAKEWADVDDYRLVDALFELDA  
SCIEDVDWNLDDHRPGEICRKRWNQMV LHIGKLKNS SFAEQIEVLAKRYRPFDAEVREAWDNKPVVP

>CcMYBR11 |Locus\_ID=BC332\_32616 |Protein\_ID=PHT98432.1 |Protein\_len=580 |  
scaffolds:98923-104063 |strand= -  
MERYLFKRRADEKERKKHGHSEKFS EDCDEVALRIVEGKKSRLKKSRAVEQEKMHDTEDEVQEDIVADEVDEGDISSPIK  
IEEKNRTDNGNIKKRKKVKS GHSSSEDPHEIEEKNRTDNGNIKKRKKVKS GHSSSEDPHEIEXXXXXXXXXXXXXXXXXXXX  
XXXXXXXXXXEEGLKKILNSRSYPEIRGCWKEIGSAIPYRPYTAVYYRAQILFRRSESRKWTEEEYEIVRKFKQEHGNNWK  
VLADELGKHRFHVKDTRRIKRPNQNGQWTQEEYQSLFDLVNTDLRLRLSEEKRSKYGMLRDNIAWTAISDKLSTRTEA  
NCCLKWYDQLTSPMVAKEWADVDDYRLVDALFELDASCIEDVDWNLDDHRPGEICRKRWNQMV LHIGKLKNS SFAEQI  
EVLAKRYRPFDAEFSEDCDEVALRIVEGKKSRLKKSRAVEQEKMHDTEDEVQEDIVADEVDEGDISSPIKIEEKNRTDNGN  
IKRKKVKS GHSSSEDPHEIEEKNRTDNGNIKKRKKVKS GHSSSEDPHEIEEENRXQE QKHTIHWKNSRNMNRNRGILAD  
LDQGKLSLKRNIIRAPDLVF

>CcMYBR12 |Locus\_ID=BC332\_30379 |Protein\_ID=PHU00592.1 |Protein\_len=1674 |  
chr12:75409421-75417817 |strand= -  
MPPEPLPWRKDFFKERRHDRSEVLPRWREPASHHHYTSRWLPDFRSRAPPPGHGKQGSWQMYPEELGHGFMTSR SNEK  
IVEDESCRQSRGDAGKYGRNSSSSRENRSFGQRDWRGGGAHSWEAASPSGSGSVRQNDATNNQRSLDVM EPHSEHVNTC  
DQSHSRDQHNSATANATASTGQRFERETSLGSI EWRPLKWTRSGSLSSRGSLSHSGSMGVDSNETKPELRLGNSKAVQS  
LTGDATACVTS AAPSEETTSRK KPRLGWGEGLAKYEKKKVEGPEDNAV KVGTSISGDSVEPSHSQLLNQADRS PRVAVFP  
DCQSPATPSSVACSSSPGLEDKQLVKATNIDQDVGNLCGSPNVVSQYYAEGSGFNLENWDLAQISNLNSSINKLLQSEDP  
SSVDSGFM RSTAVNKLLVWKS DITKALEKTEAEIDSL ENELKTLISGPKN TQLVPSASCSPPKDCNANSHEDQGATSNIA  
SGPAPLVVDIPDDL VGEEGANI HENEQTEVKVEDIDSPGSATSKFVELPSEKDVAPVDVLKHGGIFISDDSKSRRLNVNM  
CSFTEESA KSRSSDVKLCSFNEEKARDTLVCWERSQPTAGYSYSASNGILNGGEDALYNLILAANKDSARRAF EVFKNLL  
PASKCSFDFSRTVRV SLLQIDHAVEERFAKRKQFQFKEKIIALKFRVQHHLWKEDIRMLS VRRFRAKSQKKFDLSLRPV  
QIGHQKHRATVRSR FSTTVGNLSLVP SSEILNFASRLSELGAKVYRNTLRMPALILDQKERM MTRFISKNSLVEDPCAV  
EEERGLINP WTSKEREIFIEKLATFGKDFRKIASFLDHKT TADCI EFYK NHKSDCFERTRR KPDYSKQAKVCSANRYLV  
ASSGKRWNREANSASLDILGAASIAANVEDSIEIRPKGTSKYTVRMITEYKASRLNELERSNSLDVCHSERETVAVDVL  
AGICGSLSS EAMSSCITSSVDPGEGNQEWKHQKVGSSTRLPRTP EVTQSMDD ETCSD ESGEMDPTDWTDEEKSAFIQAV  
SAYGKDFITVSR CVGTRSRDQCKIFFSKARKCLGLDKILPVPGNLERQDVNGSDPDACSMETKLLCNGKSSLMLEDVSD  
LCMKVGISNHNLTSSDEKDGAGELDSVDILQVNCDDVKQEV EFN RDCDQIGACIGNRGDENMVI V SQEGVEIGGDASEN  
GLLDIPCNEVS AKHLGEEISSPEHDLKDRKAEIAEVGRSNC SLED RKPMMVLSGNNSGLAAPRG GGLCPLNGFQNMTHL  
ESDSECKLYLESNISVQSKQMP EGANADKLSEEL ENVCDEQCENATQSAELPLPSHSRLAQVESCQILGSYSVGESALTQ  
FGDPGCRTSAALQEIQVGRNLQLDTFSTTG CFLQKCGNTNRGGGSVDVLI PNREQTAGSSSNLEKHC RNGDVKLFGQI  
LSKPCPQANPSSNAHRSDGSNQQLKIGSDSFSASHILDGNSATAKFERNNFPCSETHQLRSFGFW DGNRIQTGFSSLPDS  
AILLAKYPAAFGNYGISSTKMEQPTLHGAVKMAERNLNGVPGFPTNASGNNGVAAADYQVYRN RDVQPF TIEMKQRQ EAF  
SEMQRKNGFDVVSGVQQARGVLVGRGGILQCTGVSDPVA AIKMHYAKAEQFSGQTASI IREDDSWRSKGDVSR

>CcMYBR13 |Locus\_ID=BC332\_17457 |Protein\_ID=PHU16252.1 |Protein\_len=464 |  
chr06:245576455-245578945 |strand= +  
MGIDTHISQWILEFILRQPLDDNILNDLINVLPLPNDNLNLK KALLVRKIESEIANGSVTEKILELMELIEELD HQEGII  
RDSVATKAAYCAVAVECTVKFLKSERAGSDKGKYFEAVRRIWKRRINLIEKVENVGVLSEELWSWRDEIEAALWEDRCAE  
NVIRRSKGVFAVDVVNAFVREAKERIGAPFLEVVAETYHTDEAVKSVFGEVNKGGASKNGKEVCKGNALPRKKH VAFKR  
TRGASGIRISDSIESEVEASGGQDDSSAEVKIAKKALKLSSLELRAMVKDPLPDALRFAETLCSVVRDNM GHQPAENNSD  
MAPQPMVSSSRMAQAGGENREAAQNC HHAASKPDLANRSSAAHTFEWDSFLDDINEGSPSGVNRVTLSPSPKRTKVSPLK  
KYEFKKITTRRKPVKWSALEEDTLRTGVQKYGIGNWKVILDAYRDI FTTRQSGDLKDKWRNMIS

>CcMYBR3 |Locus\_ID=BC332\_15220 |Protein\_ID=PHU14015.1 |Protein\_len=378 |  
chr06:81614676-81616401 |strand= -  
MEGSSSTEESKLSPKNQIEFGEEEEEDDLETEEKSQAQGTTRTCSNSTVEENGKKTNSG SVRQYVRSKTPRLRWTP E  
LHLRFAHAVERLGGQDRATPKLV LQLMNIKGLSIAHVKSHLQMYRSKKTDDPSQTVSTDGRTLL ENG DHHIFNLTLQLPRL  
QGYNQTS SSSRLRYENALWSRQPN SMYNSYNVNIGGGSRTSTRHGFASHINGYSSDGQLFPWNKPIDTEKKQNR PQFLNQ  
RFWPTQIGISSAKQNL LMTLQFN RNTVETATQFNRR EQEMMTQVRANISLSSSRGKGW TSEEVAGTITSTSNKRKIQDSE  
INLDNL SLKATREDHDDHLKRLKAEQVGDLLSLSLYSSSTNDQENNGKKANTLDLTL

>CcMYBR4 |Locus\_ID=BC332\_24070 |Protein\_ID=PHU07581.1 |Protein\_len=278 |  
chr09:211170957-211172475 |strand= -  
MLEDSDETGCNSKTSSNFKKNEDETEENGSSKFKDGGSSSDSTLEESEKKPYVRPYVRSKMARLRWTPDLHLRFVHAMER

LGGQDRATPKLILQMMNTNGLSIAHVKSHLQMYRSKKMDGQSQGIGHHRKLFMEGGDPNIFNLIRFPMFPAYYQRLNSTF  
RYGDASWNCNGNWMPTMGQTTLTGTGRGLYTTLNHLCTRIPSFPEIKDVLGSSSRGNPSDDLTRLFNIAAKSQARAFDNG  
IASSPDLERAITPLKRKVSECDLDLNLHLGGYEVYRRC

>CcMYBR5 |Locus\_ID=BC332\_10237 |Protein\_ID=PHU19086.1 |Protein\_len=350 |  
chr04:8011491-8017021 |strand= +  
MEHNGETSEYYMEKVMSSIDLNEEVDHDSKIQQIDDEAIEVISVESDKITNEENNSSSCGNEINIKNMSKVRQYVR  
SKLPRLRWTPQLHLSFVNAIHRLLGGQERATPKVLQMMNVRLSIAHVKSHLQMYRSKKLGEFGQVLGHGHRANQRRNYL  
YGDLSQRSFNPLQDFKMKNGAIVLARNFNDDDNINHHFQNSFARTQSRMEWSSHQGTNNLLKMKILENHQICPIRQRHY  
FLEEKWPPPEFNKNKLNSQSLFHHTGPKWSCRNNLDPKYKTPLRFEMKQDKKFILEKDYWLPDLQLGLSRSEENNMKE  
KIIHHSNKVELSDINTMLSLSLPSYSSSAT

>CcMYBR6 |Locus\_ID=BC332\_04479 |Protein\_ID=PHU26147.1 |Protein\_len=382 |  
chr02:137657966-137660949 |strand= +  
MAENLVKQDHEEMMMIMENSSSSSIDLNEKNKGESEEEEEVIEVEDSSEKETERISNYNSCDVEKKNVRQYVRSKLPR  
LRWTPELHRSFVQAIQRLGGQERATPKVLQMMNVRLSIAHVKSHLQMYRSKKLDESGQVLGRGNRMGMQGRGYFFRNH  
LGGQRYNPIQDFKMKNGAIVLARNFNYYDDHALKGRFRNSFSRPPYQSKGIISRYMQWSSDNQGGLCNTTSLQGEDLLRM  
KSWQTPRQAVIEENGIHEIVPIRSTQFLEQKKWPPFIPNQWEEKRADFCSAKNSHFLQQLNGQPYSKWKYCRNNNALEQ  
NLVTPFTFEMKQDKSPLEEKDWLPDLQLRLSRSTEDKNESNRDQSDINTMLSLSLPTYSAT

>CcMYBR7 |Locus\_ID=BC332\_05115 |Protein\_ID=PHU26783.1 |Protein\_len=252 |  
chr02:150879297-150881907 |strand= +  
MMKENSSKNSPCNLSMRLGHVEQQILENSNKSSSGVRPYVRSKMPRLRWTDLHRNFVHAVERLGGEDRATPKMVLQLMD  
VKGLTISHVKSHLQMYRSMKHEQMMQAEAEANGIKRNRMDGPDQLNLYNYYDGKALLDGHPSKVTINYFNLIASSTPNF  
SPAQWKDMQEKMMLEGQSKPACNMFDRDFNGCTTVQDGNYNIGECGSSLSNNRCSIIDTEEEAQDSSSTMSLEPSACLD  
HGTNISLDLTG

>CcMYBR8 |Locus\_ID=BC332\_11027 |Protein\_ID=PHU19876.1 |Protein\_len=150 |  
chr04:142857940-142858392 |strand= -  
MAMGRRNCTLCGGNGHNQRTCIEKGKSIKLFQVEITTSTVAAMSKIGRKIKKGNPWTEDEQIAFLKGLKFHGKGNWAKIA  
KDFLPSRTSTQIASHAQKHFMRLDANSSERKYLKSSVFDLHLEKTEDREHAIVPVETHHVPFSLSNYNR

>CcMYBR9 |Locus\_ID=BC332\_11026 |Protein\_ID=PHU19875.1 |Protein\_len=201 |  
chr04:142716893-142718911 |strand= +  
MFRKDYRRKIKKANPWTEDEQIAFLKGLKLHGKGNWANIADFLPNRTSTQIASHSQKHFMRLDVNSNERKHHKKSSVFD  
IHLKKIEDIEHAIVPLENNQESLHVPIFLPNFNLTKRIQVPKVTPTWVYMPYHQYTSTSAKLLETIFCFLDFQDIKES  
PILIRDPVIDFFVKQAVQSAPLSSVIKVGSLDKSIPCPG

>CcMYR1 |Locus\_ID=BC332\_26464 |Protein\_ID=PHU05642.1 |Protein\_len=415 |  
chr10:214548398-214550730 |strand= -  
MYHHHHQATNMHSSTRMSFPERHLFLQGGNANGDSGLVLSTDAKPRLKWTPDLHERFIEAVNQLGGADKATPKSVLKLGM  
IQGLTLYHLKSHLQKYRLSKNHHGQANSSRDNKAASMEKICESTGSPTSNSPIAPQPNNNIPISEAIQMQUIEVQRRLE  
QLEVQRHLQLRIEAQGKYLQAVLEKAQETLGTQNLGTIGLEAAKVQLSDLVSKVSNQCLNSAFSEIQELSGFHPTQTQAT  
QRLADCSLDCLTSSEGLRDLQEMHNNQVGLRTLNGFPCTEDIENQARLHRTDLRWRDDLKENRLFPMKDEDETEKEFAK  
ETNWSNLSMNVGSQENRRNVSSYVDGRLNGIDADIKLFHQAPIDRSSTKPEKQVSPQEYKLPYFAPKLDLNTDDQTD  
ASSCKQLDLNGFSWN

>CcMYR2 |Locus\_ID=BC332\_26060 |Protein\_ID=PHU05238.1 |Protein\_len=414 |  
chr10:188527457-188529757 |strand= +  
MYHHHHQDNMHPSTRMSIPERHLFLQGGNGNGDSGLVLSTDAKPRLKWTPDLHERFIEAVNQLGGADKATPKSVLKLGM  
IQGLTLYHLKSHLQKYRLSKNLHGQANASGANKAAAGVERISENSAACISNPSMGPQPNKNIQISEAIQMQUIEVQRRLE  
QLEVQRHLQLRIEAQGKYLQSVLEKAQETLGRQNMETVGLQVLEAVKQLSEFVSKASNQCLNSAFPDIKELSGFHQSRTQAT  
QPTDRSIDCLTSRDGSLRDNAMHDNPIGLRPFDFTPSMECKDIENDTRIQQTELRCWCDNLKENRRLFSPVNEGREGAFT  
RETNCNNLSISIGLQDEKLNQSMNYSNGFSGTERDVKLHQVAKRSESVPERQKSSQEYKLSYFEPKLDLNMHDETDAA  
SSCKQFDLNGFSWG

>CcMYR3 |Locus\_ID=BC332\_27762 |Protein\_ID=PHU02511.1 |Protein\_len=339 |  
chr11:27041239-27043111 |strand= +  
MNLVLSSDAKPRLKWTPDLHQRFDVAVSQLGGPDKATPKSLMRVMNIHGLTLYHLKSHLQKYRLGKSQVTDQSFDEKKQE  
GKLELCTIAHDDDTKENEISKSLNQRTYFDAESDQLSLGVSCDGSQNMNESLQIARALQMOMDVQRKLHQQIEVQRHLQ  
LRIEAQGKYLQSVLRKAQETLAGYGTSSVGVELAKAELSQLVSIVNMSCCPSTSLSAITEIDGSISKDTQTKNLKGGILS  
SLESSLTSYESSVRKEDQNDTRNNKNTNCIGLSLNQETKERKRSRNNICDHDMCVEQPSGKRFLLETIDLNSKCPNEYDEN

GPKVIDLNYKEVEQFNEYS

>CcPCL1 |Locus\_ID=BC332\_15022 |Protein\_ID=PHU13817.1 |Protein\_len=304 |  
chr06:31099385-31100299 |strand= -  
MGEEVKITDGDAAFAGDDNRVLEWEDGLPSFDDLTPLSQPLIPPELASAFRITPEPAKTM TDVHRASESTFSSLRAGGGL  
HMLSDKFNFNEGGRNENDEVDLTRDGS DSRKTRRIDPEMVPEEADSALRNEMNCGDDNSAKTLKRPRLVWTPQLHKRFVD  
VVAHLGIKNAVPKTIMQLMNVEGLTREN VASHLQKYRLYLKRMQGLSNEG PSSSDHLFASTPVPQSLQQSGVGNNGNSG  
NGHSSNGHMPMPMPMPMYPPQMVPM PMMSGHGYHHQYNMGQPRDWSGNKFGSYHHVAPGEK

>CcPCL2 |Locus\_ID=BC332\_17321 |Protein\_ID=PHU16116.1 |Protein\_len=293 |  
chr06:243275452-243276333 |strand= +  
MGEEVVTKLTDYDSNGVNDDRLLWEAGLPSADDLTPLTLQLIPSELAHAFRISPES SKTMNDVNRASQNTFTSLQRWHSQ  
DMASMNREETVTERDETLVRQSDPKLRRVESGGTDEAADADSALCSEKFETVKRPRLVWTPQLHKRFIEVV AHLGIK  
NAVPKTIMQLMNVGGLTREN VASHLQKYRLFTKRMSNEEPSSSPDHLCTSRGATPQSLRESSESCHPHNTNGHMGMP TM  
MPYQPQMMPMPMMGMTNGGHVGPVGYAGGPPAGFHHPYNFGYYHPVASNDN

>CcPHR1 |Locus\_ID=BC332\_07350 |Protein\_ID=PHU22243.1 |Protein\_len=461 |  
chr03:55690408-55697022 |strand= +  
MEARPAVSVQNVVASQLSNC GASGTLSSSLCMFPTALGEKYPKFPDLQQASMEKELQH PGTVASSLPSNSGAVGHMFSS  
SSGFSADLHFSSVSTQEKHSGPTS FISQSTYSETSITFPHSGVLQSTASSQYLNENHEPWCIDPLPNFLDYSVDTPVQNS  
QVACSDKQSDWQEWADLVINDE DALTSNWNIDIMADTSIADLELKYQEGKQPLNFQM QVQVESEQIPAVPVENLVIAPASS  
PASSAATKQRMWTPELHEAFVEAVNKLGGSERATPKGV LKLMKVEGLTIYHVKSHLQKYRTARYKPEASEAGSSEKKQS  
SLDDLSSLDLKTGIEITEALRLQMEVQKRLHEQLEIQ RNLQLRIEEQGRYLQMMFEKQCKSMPGVDLAKGSSSTADDAFA  
QLSDAVQNSPGTNEPGVSKFVTAKEVDEKQKLRE REVLEDPETNITSPSDSPPLKR SKLDE

>CcPHR2 |Locus\_ID=BC332\_14656 |Protein\_ID=PHU13451.1 |Protein\_len=434 |  
chr06:3724639-3729428 |strand= -  
MEARPALSVQREGAHP LSNCGAHSSLPVLRASLEEKYPKFPGPVLSSLPSNSGAVGH L FSSSSEFSTNLHFSSVLPHEEH  
SASAPFIPQATNTEASVRLAASSQYVNENSEPWCIDPLSEYLDYSLNTPVKNTQLDCSNTGDCHIP PEDLSKQSDWPEWA  
NLIMNDDDALSNWNEIMVDAGIVDAAEPMQYQEQNQPSNFPAHQGQLQ QIPASLETSGIVPASSTASGASSKQRM RW  
TPELHEAFVEAVNKLGGSERATPKGV LKLMKVEGLTIYHVKSHLQKYRTARYKPEASEGSEKKESSIGD LSSLDLKTGIE  
ITEALRLQMEVQKQLHEQLEIQ RNLQLRIEEQGRCLQMMFEKQCKSMPGIDASAQPTDAVQSSSNKNDPGVSLVDHHEAG  
DRTQRTVGEKQKENEKEDTSSSNSPPSKRAKVDE

>CcPHR3-1 |Locus\_ID=BC332\_14381 |Protein\_ID=PHU18686.1 |Protein\_len=448 |  
chr05:234637395-234640307 |strand= +  
MNMRRALCIQRSSEA QNGNMGVSGAMSTSSNLIPSQAIP SASKSRTVGHLLSSTSEPHKDFNF SSTSSESQRQRKYPFIS  
SEASAATCRSSLSSI HSTSLDNYPIGNDSNSSGKDACHDFINFPANDLVQNGQVESLAVVMPSDDQAKRFDWQEWADQLI  
NDDDDRLGSSWSDILVDINPPEIKFLETSEVLACESHILPPPPSPAAAAAASSGQICPVGSPSSTTALAKPRMRWTPELH  
EVFVEAISKLGGSEKATPKGV LKIMNVEGLTIYHVKSHLQKYRTARYKPEPSEGTP EKKPTSVIEMPSLDLKT TMGITEA  
LRLQMEVQKQLHEQLEIQ RKLQLRIEEQGKYLEMMFERTKDIGKDFKVSSSITDEHPSPSTEPKHSPNDKSEALEKDPV  
SLNDRSSSGKSPDKKAREDHDTDGT DSCCSPSKRARTEERSAVHES

>CcPHR3-2 |Locus\_ID=BC332\_14380 |Protein\_ID=PHU18685.1 |Protein\_len=392 |  
chr05:234617887-234620559 |strand= +  
MGVSGATSTSSNLIPSQAIP SASKSRTVGHLLSLTSGPHKDFNF CSTSSQESRQHNYPFISSEASAATCRSSLSSI HSTS  
FDNCPIGNDSNSSGKDAYHDFINFP TNDPVQNGQVESLAVVMPSDNQAKRSDWQEWADQLINDDDDGGLGSSWNDILVDI  
SPPEIKFLETSEVLACESHILPSPA AVVAAAASSGQSYPVGSPSSTTALTKPRKRWTPELHEVFVEAVSKLGGSEKATPKG  
VLKIMNVEGLTIYHVKSHLQNCQIRYKPEPSEG TSEKKSTS VIEMPSLDLKT TMGITEALRLQMEA QKQLHEQLEIQ RKL  
QLRIEEQGKYLEMMFERTKDIGKDFKVSSSITDEHPSPSTEPKHSPNDKSEALEKDPVSLNDRSITGQESS

>CcPHR4 |Locus\_ID=BC332\_14379 |Protein\_ID=PHU18684.1 |Protein\_len=99 |  
chr05:234614315-234615237 |strand= +  
MGITEALRLQMEA QKQLHEQLEIQ RKLQLRIEEQGKYLEMMFERTKDIGKDFKVSSSITDEHPSPSTEPKHSPNDKSEA  
LEKDPVSLNDRSITGQESS

>CcPHR5 |Locus\_ID=BC332\_14389 |Protein\_ID=PHU18694.1 |Protein\_len=405 |  
chr05:234698981-234707259 |strand= +  
MVAFPASLVSSAFEIHGDCNLRIAGTSEKKSTS VIEMPSMDLKT TMGITEALRLQMEVQKQLHEQLEIQ RKLQLPIEEQG  
KYLKMMFERTKDIGKDLKVSSSITDEHPSPSTETKHSPNDKSEALEKDPVSSNNC SSSSSSGKSPDKKVREDHDS DGGD  
SCCSPSKRARTEERRMTTPDDAETKVVKVDIMNAAQIHLV VATTLLVTVTFAAGFTLPGGFESDHDSPNKGMAILTKKSA  
FCAFVVTDAIAFVCSAGAVFSYFVMAANHRPKTAKELRVLMDIYRVATILQFLSMFAVVIAFITGEVVKRHEAFRDLVR

GIRNNNLGMKYEDQFIPRMLLKWTEAAKYLRSRKTSAYITVNYYSYSHA EVGSLTTPASRKNNHNRAEYNERDAANDTDS  
NGWTN

>CcPHR6 |Locus\_ID=BC332\_26869 |Protein\_ID=PHU06047.1 |Protein\_len=423 |  
chr10:225668105-225672293 |strand= +  
MSIQNYELPSDYNLEFPQMGCFCQPENDHQQLQQQNLWPSNDSRSSSRSMISRIGSSPSGFFATERYLGLTQYEQDNN  
NNNSCSQLSKNHDPQVAAFTQCGNGFLVTSSSARVDTDIPKISMPSFIRPLDSHGLYGNPFSNLSEKERVLLLKRGHGF  
KPWKQPLAEMQGAAYDTPLWWGSPDTAHSGSVSAPGFPMKVSNNTCGFNLVHIRQQSGSQSANSYNNSSGCSGGSLS  
KTRIRWTQDLHDFVECVNRLGGADKATPKAILKLMDSEGLTIFHVKSHLQKYRNAKFIPESTEGKTEKMDKQNNVTQID  
GKTGMQIKEALHMQLEVQRRLHDQLEIQRLQLRIEEQGEQLKKIFEQQQQTTRSLLLETRNSSISSHADPFTPHEDEVFV  
EESFDNSHFQSKISYNDMETTFV

>CcPHR7 |Locus\_ID=BC332\_26620 |Protein\_ID=PHU05798.1 |Protein\_len=263 |  
chr10:220993713-220995148 |strand= +  
MSSYDPQQCRNGFFEDSMVQSEPIPSFISPEGPCRQYTFSDASEEERMLHLKNKLLGEFDASYRRHPALPFDGNQDYC  
LCHDLCGSQLTCMQQSSPSLTCHNSASSGATQKPSKTRIRWTEDLHDFLECANRLGGADKATPKQILNLMDSLSLTL  
DQVKSHLQKYRNAKHPESAGKSEKRNSLDTVTDIESKTATEITEALKMQLEVQRCLHEQLENQRTLQTRIEEQAKKLMI  
LDQQQNTNRTVLETRNSNVSSDN

>CcPHR8 |Locus\_ID=BC332\_16139 |Protein\_ID=PHU14934.1 |Protein\_len=332 |  
chr06:203462411-203466083 |strand= -  
MYQPKGVP TSSLAHNNVAVNNQSLDCAGGSMDPISGGTNNPSLASKQRLRWTNELHERFVDAVAQLGGPDRATPKGVLRV  
MGVQGLTIYHVKSHLQKYRLAKYLPDSSSDGKNSDKKEPRDMLSSLDGSSGVEITTALKLQMEVQKRLHEQLEVQKQLQL  
RIEAQGYLKKIIEEQRLSGVLSEVPGSGVTAPPTGDNPESDNRTDPGTPAPSSSEPHVDKPVKAHALTKSLSMDES  
SSHHEPLSPDSDFHETSPIESPNGERSSKKQRVGTSAFTKDNMALPHQILESSLSPYQQPHSAFMTRDQFNFTSGLSL  
GIDDQKVSGSNI

>CcPHR9 |Locus\_ID=BC332\_23400 |Protein\_ID=PHU06911.1 |Protein\_len=80 |  
chr09:47507492-47509477 |strand= -  
MASNRSDCSSKERLKWTELHDLFEKAVSQLGGPERATPKGILKVMGIPGLTIFHVKSHLQLASPKGKAYLKFCQTSALQ

>CcRAD1 |Locus\_ID=BC332\_32239 |Protein\_ID=PHT98820.1 |Protein\_len=102 |  
scaffolds:433813-434481 |strand= +  
MATNSTWSNQNKLFENALAIYDTPDRWRKLAKAVGGKTEEEVKSHYEKLVEDIKHIESGNVPLPNYNNGGGGGGGGGR  
SNNGNNIIMDHEQQLKYLKLQ

>CcRAD2 |Locus\_ID=BC332\_22475 |Protein\_ID=PHU10615.1 |Protein\_len=99 |  
chr08:191562318-191563676 |strand= -  
MASSSLRSSSSWTPQNKLFERLAQFDKDTDRWQNVARAVGGGKSAAEVKRHYEILLEDLRRIESGHVPFPTYTNA  
NNGVGANEHRLLRYMNLH

>CcRAD3 |Locus\_ID=BC332\_31082 |Protein\_ID=PHU01295.1 |Protein\_len=89 |  
chr12:212285385-212287135 |strand= +  
MATWTTKQNKKFEDALALYDKDTPDRWHNIARYVGGKSAAEVKRHYELLEKDVMKIENDQVPLPNYRANASNGRSNYANE  
QRLLQNLRL

>CcRAD4 |Locus\_ID=BC332\_33762 |Protein\_ID=PHT97307.1 |Protein\_len=92 |  
scaffolds:351-1915 |strand= -  
MATNWTTKQNKKFEEALVMYDKDNNGEKWHNIARHVGGKSVEEVRRHLDLLRDITQIENGQVPLPNYRNASESNARGYA  
NEQRLLKNLKLQ

>CcRAD5 |Locus\_ID=BC332\_32248 |Protein\_ID=PHT98829.1 |Protein\_len=92 |  
scaffolds:522402-522680 |strand= -  
MASWTARQNKKFEEALALYDRDTPDRWHNIARCVGGKSAAEVRRHYLELLVTDIMQIENGQVPLPNYKAAENNNRGYANEL  
RYPKSLLSIQPN

>CcRAD6 |Locus\_ID=BC332\_32247 |Protein\_ID=PHT98828.1 |Protein\_len=89 |  
scaffolds:512698-513428 |strand= -  
MASWTARQNKKFEEALALYDRDTPDRWHNIARCVGGKSAAEVRRHYLELLVTDIMQIENGQVPLPNYKATENNNRGYANEL  
RLLKNMKLQ

>CcRL1 |Locus\_ID=BC332\_22472 |Protein\_ID=PHU10612.1 |Protein\_len=87 |

chr08:191552066-191552329 |strand= +  
MSSSQASQGSASSWTAKQNKAFERALAVYDKDTPDRWSNVAKAVGGNKTAEDVKRHYEVLHDMFIESGGVPFPNYKTT  
RGRTNTN

>CcRL2 |Locus\_ID=BC332\_25561 |Protein\_ID=PHU04739.1 |Protein\_len=88 |  
chr10:95640860-95641126 |strand= -  
MSSMSSQHSGSPSWTAKQNKAFAKALAVYDKETDRWSNVSKAVGGKTAEEVKRHYEILLRDVFYVETGRVPFPNYKTTG  
GSHNSTSD

>CcRL3 |Locus\_ID=BC332\_05377 |Protein\_ID=PHU27045.1 |Protein\_len=78 |  
chr02:156122441-156122677 |strand= -  
MASNSLSAWTPRENKKFEQALAVYDKDTPDRWQNIARYVGGKSVEEVKHHYAILVEDLKHIESGDVPFPKYKSDGKSR

>CcRVE1 |Locus\_ID=BC332\_07817 |Protein\_ID=PHU22710.1 |Protein\_len=893 |  
chr03:163501351-163508906 |strand= +  
MTNGKRAEKNKDIMELKDDVLVWEIISRLPLKLAVQCKVLNKDIKGRISDPEFLRTWFRROEDPSTELIYTLNGRHRSLH  
KITLYPIPIPTQMETPLSCDIEILASCNGLILIDFDRVTKYCVFNPLTGEHQLIPYPLMPSNRLHSMGFAVDYDPSDQYKL  
VTISERVKYSHRFYKFSLLSSQQPGFWHEIQETSSFRPFEGNPPVYWCGLYWLRCESVVAFDTRRQASRVIEARFI  
PQYDFKYGNISTGNMRLGTAQGVLTACIFRRLIVLATYDNARSSWTVTHTVDNFISRMGSFVAGFPVWIDSKQVSFLM  
ERPWWVTHYWDLYEYDTEINGYRKGAEWSHVGYPMYFHTPLASVHQAPFKNVEADDLLYIAAKLNYIRGFIIEGTSQFQ  
NQAEGAWQGASSVNSSKLEIVATQEKAPTCLANKNALKVRKPYTITKREKWTEEEHQRFLKLYGRAWRQIEEYVGS  
KTAIQIRSHAQKFFAKVARDSVNDGDESLNAIDIPPPRPKKKPLHPYPRKMVDSPVANKAVSGQPESSPSPNVSGRVSR  
PDSVLSAIGSGVSEYPVAEQNSRFSPASCTTDVHTANIISAENDDSMSTNSSTVEEVHVELKPISASTSPIANSMDVI  
PLEACNLSALPCYLGLTSLGLYVPLQECDIVHRENSCNGEKLAVEAPSASIKLFGQTVFIPDANNLALRAPYNCNSLPS  
KSTEKEIKISSEDLHSFQANQANSQFMLAMVPGNMIPPASWLSHNMLENNEITTVFPTTVSWWSYQDLVNRSLSCD  
QKAMETAVHCQGPKEEPQREGSSTGSSIGSASEVDDGNRSSETAESKCTAKSYKWNNSKGFVPYKRCLAERDDKSSGAV  
LEERESQVRVCS

>CcRVE2 |Locus\_ID=BC332\_03406 |Protein\_ID=PHU25074.1 |Protein\_len=506 |  
chr02:49791267-49800127 |strand= +  
MQLMECRVGLDHGLTEIIVKTDGSRQQLIYRDQSESDTTPPSRSRISLAVGARIQLEEQVTPAEEYAPKIRKPYTISKQ  
RERWSEEEHKKFLEALRLHGRAWRRIEEHVGTAVQIRSHAQKFFSKVVRESNNGDASSVKSIEIPPPRPKRKPMHPYP  
RKMATPVKSGTLAPGKLKSSSTSPDLCLSEPEDQSPTTVLSALGSFAFGTVHSSKPSEHSSPVSSDVAENSGDVVLESPD  
IILEERRSSPARGYASSNQDNQSCMKDLFPEDNDFVKEGLDEASSTQCLKLFGKTVLVTDSYKPSSTCGEILLTDENDE  
PASPTLPQSSVPTKYLRWGSECARSTSTIGLPAQSYIIPAPNGSSGPNQSTTSPLLPGSSYVSDKFPCAkvHSPiPIKG  
CPLFNETGLDDKETQKEGSSTASNAESADVESSGDTNLEIEAQSGNGNLVVVSVRVSVPLFERRANFTKRVEGFVPYKR  
CLAEGLISSSTITGEEREEQRTLCL

>CcRVE3 |Locus\_ID=BC332\_26256 |Protein\_ID=PHU05434.1 |Protein\_len=287 |  
chr10:205096625-205102246 |strand= +  
MANNSSPTDASGKKVRKPYTITKSRESWTEEEHDKFLEALQLFDRDWKKIEDFVGSKTVIQIRSHAQKYFLKVQKNGSI  
AHVPPPRPKRKAHPYPQKAPKNVLVPLQASMGYPSSMNSLPPGYPSWDDTSVLINSPTGGVMSSQDEYHLQRIQADIGS  
KGATLIGNSSISGIRSSNRAAPNSELPEQSKLGSVPHGIPDFAEVYNFIGSVFDPDTRGHVQKLKEMDPINFETVLLLMR  
NLTMNLASPDFEPIKNVLSTYDLNTKVVGLPPTGGAVSNHNDLSCQTI

>CcRVE4 |Locus\_ID=BC332\_21524 |Protein\_ID=PHU09664.1 |Protein\_len=319 |  
chr08:170384947-170392394 |strand= -  
MVSVYPTLPGQDFQYMGDPMKTGLRGLHPVQSGTGLVMPDDPNKKTRKPYTITKSRESWTEQEHDKFLEALQLFDRDWKK  
IEAFVGSKTVIQIRSHAQKYFLKVQKSGTSEHLPPPRPKRKAHPYPQKAPKVMQSVGSIQFQPPGALPEPGFGIGPDP  
LSVPGNAINFSPWTDNVPAlSTTQMRKDDAQLTSGGVMQNCSSSSNESMPNRNKTLEANDQKESQKQMKVMPDFAEVYS  
FIGSVFDPSTRDHLERLKKMDPIDIQTALMLMKNLSFNLSSPECEDHRRLSSYGLGIEKDKMDLPKTD FRGNAIQAV

>CcRVE5 |Locus\_ID=BC332\_15390 |Protein\_ID=PHU14185.1 |Protein\_len=301 |  
chr06:114656963-114672905 |strand= +  
MVMALPNLGSFSNPTATASPAGATASTSNPLSPSDDPSKKIRKPYTITKSRESWTEPEHDKFLEALQLFDRDWKKIEAFV  
GSKTVIQIRSHAQKYFLKVQKSGTNEHLPPPRPKRKAHPYPQKASKSAPAVSPVPTSFAQSLPLPEPGFVKRPDSSFLP  
SNQVTVPVPSWTDNSVPPVSLSIKKDNVRETGQLVANNRCCSSNESTPRSKSTVKVIERTQAPSLRVLPDFAQVYNFI  
GSVFDPAVTGHLQILKKMDRIDVETVLLLMRNLINLTSPDFEHDRQLSSYDIDMEKKCK

>CcSRM1 |Locus\_ID=BC332\_03442 |Protein\_ID=PHU25110.1 |Protein\_len=392 |  
chr02:60415030-60427475 |strand= -  
MTIDESSSSISREQDKAFENALATYPEDSADRWEKIATDVPEKTLEEVKHHYDLLLEDVSRIESGSVPLPCYNSSSDSS

PSHGGDDGTGKKTGNSGNLNGESNHGGKSMRADQERRKGIWTEDEHRSGSRLSYLCEASAGLSILAPPELDDSFKLHF  
PDMLESGKCSVLEWYDELLECLVDSYLVPIAGGRYPVELVEVHASLYRESNLIIMLYLRGFENRLFLLGLDKYKGKDW  
RSISRNFVVTPTQVASHAQKYFIRLNSMNRDRRRSSIHDITSVNTGEVSVPPGPITGQANGSSAGSSSKPNKQQTPTVR  
ATPLGVSIYGETSIGQPIGGPFVSAVGTPVNLPPPTHMEYGVLPPIGAVVPGAPKNVGPLTYMPHTSMHR

>CcSRM2 |Locus\_ID=BC332\_12967 |Protein\_ID=PHU17272.1 |Protein\_len=316 |  
chr05:26151885-26154239 |strand= -  
MTLAKSRSSIWSREQDIAFENALATYPEDSADRWEKIAGDVSGKTL EEVKNHYEILVDDVSRIESGCVPLPCYNSSVDGS  
SSHGGGERTGKKSGISGRNLGETNDGGKALRLEQDRRKGVAWTEDEHRLFLLGLEKYKGKDWRSISRNFVVTPTQVASHAQKYFIRLNSMNRDRRRSSIHDITSVNTGEVSVPPGPITGQANGSSAGSSSKPNKQQTPTVR  
FNTTSASVVGTPVNLVPPTNKSCGVQPIPEAVVSGAYNEAQIYTLVTFLKHKRTKSSEESYAYSCLVLSSSVVHE

>CcTRF1 |Locus\_ID=BC332\_22999 |Protein\_ID=PHU06510.1 |Protein\_len=515 |  
chr09:6218453-6224925 |strand= +  
QNSAFRSGLASLGVWFDEPETRDDHASISGALCFDEKRVLRGMRK GALYNIGSSSIAPKRENDINHEVLDLKQSQFEAGK  
VQAQNDLSTPCEDYLLDIEFAESITNLDYGSSRGLLDPILESQITLPSCDGTDSCGMPYSSGLVAQEAQSQNAMFGLTNS  
ELHDLSHHKCESRILVEYNAVKFPTAFNPGDISNVDDVADFFAEAVSSEKMNDMSMIDHSALTSNGISLMSNPTQNEQDQV  
NCESFDVHESAVIGPPVTSQVINVDTPVTQKRLRKPTTRYIDESSDLNARRSRKKTEVSTSAPESKNKFLKVRCKQKSRA  
ESMEMELFSEESSYKAIQVPFASLVNEECDERPASNAIQVFKPHKEDLHKEPMVVNPKDDAVAPKKLDQDGARRKHRLW  
TVSEVRKLIDGVAQYGVGRWSHIKLYFSSSGHRTPVDLKDKWRNLLKACYLQKQSKITEKGKHNLSWRPLPKSVLHRVG  
ELANMHPYPRNRRCESSRSPCASPSPEHFNNTNIQ

>CcTRF2 |Locus\_ID=BC332\_09582 |Protein\_ID=PHU24475.1 |Protein\_len=606 |  
chr03:260635966-260641486 |strand= +  
MDAIEAKTEVSVVPVTNTFGALEKEITDPIVYQLVRVDGDGRLVPATQDEIMVVEDLLEDDKCEPKLVPDTRQISESCIT  
EGLMARNLFQVP EEEKSNVLVDAVPDLGNIDAPEKVAHVHGLNPFSELSDFDQSVRTETCFLSQDASNEDMPSTSAAGSSW  
KPDFSKLEGKICLDLSTVKELQETFKATFGRET SVKDKQWLKRRITMGLTNSCDFSCCTTFIIRDNVVVKNGEEQIYHRVK  
SRISADSEDGVANSDSIGSLGDRDNRINDDADLCGEDVSTSAFESCNVT KDLDTEQRTAKRARKPTKRYIEELSELESRE  
SSEKLASPDKISR YRFACPTHMRPTKNVRSNARPLVTREDSLGSGIQIPFVSRIRRSRPRENFMPLLLKQPCGMDMVT  
RKVTSAFDVSGPQEDDKRNNDLIKSSSSPGWTQQPLIAACEKD DHYSGMKIVELENDVEPNDCSEYNSDDNVVTPTQKG  
GMRKHHRPWTIDEVVKLVEGVARYGAGRWSEIKRLAFASCSYRTSVDLKDKWRNLLKASVQLPAEKGILNSRKQASVP  
IPAAILRRVRELADMQQGFPPGLSTGKSSGHSSSDRSVHDARSGFL

>CcTRF3 |Locus\_ID=BC332\_29142 |Protein\_ID=PHU03891.1 |Protein\_len=562 |  
chr11:248978922-248982420 |strand= -  
MQNAIDPFEYNLNTSNESAMSFQQEPEQVVGAAASVYFALEEEAIGVEQLLAEPEYDDILNTLLDFNTCAFSVPESYFKEF  
SASDTVLTKSDCGALQRSHNEGDKTKEKFLDGLSNGDDENHCFISCEDYLLDIELEEDTPTLHDVTRDISCIESVNLENQ  
LADSDGRDCGVHVLTL SGASTSSDHDAITLDFNFCMSTDKLLKVFREMLGHQTPVSDNQWLKPHMIAGLENQEISDNKFS  
FPKRLDSSSENQGVKPPASCQNLITISTAFASIFTFRKPRVQVQVRRGRIQWNSFKLSVAGEIHLDCPDKWASKES  
AEENVKCDGMKSGISEQYLKCKPSRRGFGRYYRRGATVTSQGLGKRNI LPTEDQLIRREGHLSKDCKANRAHDDNIYSA  
EAQDDPSGTLSDQSSDDTSEDDWTIGCETRGTKQDRKRNNYVSTREVLKLV EGVSEYGVGRWSDIKKMFFPSSMRSPAD  
LKDKWRNLLRASCRRQLSRRGVD AKKKHRMRSIPQSVLNRVRELAVIYPHSHKQRRSRISSTASRSFSSNVKFDNHLPLVLA  
YE

>CcTRF4 |Locus\_ID=BC332\_26430 |Protein\_ID=PHU05608.1 |Protein\_len=556 |  
chr10:213500376-213503784 |strand= -  
MQTAMDPFEYNWSTWNESATSFQQEPEQVVAASVYFASEQEAIGVEQLLAEPEYDDIVNTLLDFNTCAFSVGPESYFKE  
FSASDTILTKTDCGALQRSHNEGDKTKEKFLDGLSNGDDENHCFISCEDYLLDIELEEDTPTLHDVTRDISCVESVILEN  
QLVDS DGRNCGIHVLTLSGASSSSDHDAITIDNFDCMSTDKLLMVSREMLGHETPVADNQWLKPHMIVGLENQEISEKNF  
SFPKCSLDSSSENQGANVPPASCRNLLTVSTAFASIFTFRKPRVQHVKRREHIQWNSFKCLSSVAGEIQLDCPDKWSKE  
SAEENVKCCGMKPGISEQCLKCKPSRRGFGRYYRRGATVTSQGLGKRNFQVGFQDLIRRRERQLSKDCKANRAHDDNIHS  
AEAKNDPSGTLSDQSSDDTSEDDWTIGCEPRGTNKDRKHKRYWSTREVLKLV EGVSEYGVGRWNDIKKMFFQSSMRSPV  
DLKDEWQNLLRASCRRQLSRRGVD AKKKRRMRSIPRTVLNHVRNLAVIYPYSMQRRSRISSAESLASSSNVKSNDH

>CcMYBR14 |Locus\_ID=BC332\_32768 |Protein\_ID=PHT98299.1 |Protein\_len=299 |  
scaffolds:98862-101466 |strand= -  
MGRYPCCNYDSDLKKGPWTKDEDEKLIETYKNGHNNWRLVTKNAGLKRCGKSCRLRCNNYLKPGIKRGGFTKEEEQII  
INLHSSFGNNANQDEGLIAWSSRIDGIECSLPNGYPSISSSLKVHSETFNKIETIQSRSA CLMCNDEKHKSKNGPNLSLEF  
CQANESNSSANQVEGLNIAWSSRIDGIECSLPNDYPSISNSSKVHPETFDKIETIQSRSVLLCNADKHKSRNDPNSSKG  
IQANELNSNHVEGLVPSTSKSSNLNKNKISKFSELDDIDAW EIPQDDEAISFFWNTIFQ

>CcMYBR15 |Locus\_ID=BC332\_30589 |Protein\_ID=PHU00802.1 |Protein\_len=242 |

chr12:129732389-129733705 |strand= +  
MGRSPSCDETGLKKGWPTPEEDQKLINHIKKHGHGWSRALPNKLAGLNRCGKSCRLRWNTNYLRPDIKRGKFTQDEQKTIL  
SLHAILGNNLPHLIALANLKELVHHHSSWEGQAAIAIRSLQTEVATLQYLHLLLQTPNMPANNTTISANIPEIEAYNN  
LLNSMKADQIIIGNNSLNNIIPPNSTSLQDSIPFSLPELQASSSFHLSTSLHKKEIIKTPTTIYYFTMAASFFSGSCC  
NK

>CcMYBR16 |Locus\_ID=BC332\_24180 |Protein\_ID=PHU07691.1 |Protein\_len=294 |  
chr09:228494871-228507862 |strand= -  
MNVDDIDNNNIVGDEEQDGEKNNDKNDVVSKGKYNLWKKRGRKSMKDINEGRSQSSAINNTVKKRDCIEWTTDLHFIFTK  
AVKQLGEGRCYPAEILEVMNVPSLTKKQVVSHLQVQPGFYGDHODYGLNRHTQNGYNLDINAHVPTYSVVVISVNPAC  
RTRGICKTIIPFLGDLPSDGFVSLYLGHIMVEYTFSVTFNLNRTFLPLVFGTFGRNSLKLYPSVDARPIEWPSAILAH  
RGKGQIPNCLIPVRVDIGASRQTSRSHPRWKRDTTSHHRVYSQLAISSGLAR

>CcMYBR17 |Locus\_ID=BC332\_15032 |Protein\_ID=PHU13827.1 |Protein\_len=270 |  
chr06:33697486-33699328 |strand= +  
MEAVTAILGGGLRIGVVFQKKVRDDNKTFLQAGISHEDKLDALGFTLEPSPSRASPLAPEGRSRVLPCEAQLTRCS  
PAPTIVIRNGIQGTYNQFTDHPRTNLSNFDSDHDSAPSPDAFLEKNAADSRLVPAVAADAEALAMVPMRKPKRSETA  
QRRIRRPFSVSEVEALVQAVEKLTGRWRDVKMRAFDNAKHRTYVDLKDKWKTLEVHTARISPQRRGEPVPQELLDRVLI  
VHAYWSQQARQMKHSETRLLLSDGCKG

>CcPHR10 |Locus\_ID=BC332\_14338 |Protein\_ID=PHU18643.1 |Protein\_len=104 |  
chr05:233993199-233994296 |strand= -  
MGVSGATSTSSNLIPSQAIPSAKSRTIQRKLQRIEEQGKYLEMMFERTKDIGKDFKVSSSITDEHPSPSTEPKHSPPN  
DKSEALEKDPVSLNDRSITGQESS

>CcRVE6 |Locus\_ID=BC332\_05079 |Protein\_ID=PHU26747.1 |Protein\_len=124 |  
chr02:150335758-150336875 |strand= +  
MFNSEMSLMVNNAIAPRDQSGESGVDSIHSSRNQISSDVGASSTRSIKLKEQVASADEYAPKVRKPYIITKQRERWTEEE  
HKKFLEALKLYGRAWRRIEGRNEKRLMFIRDISWLSLHINGDLD

>CcMYBR18 |Locus\_ID=BC332\_00996 |Protein\_ID=PHU28903.1 |Protein\_len=120 |  
chr01:29087811-29088173 |strand= -  
MPQQWTIIAPILGRTSSQCIERYDKILDGEGWEREDDEKLLHLAKIMPQQWTIIASILGRTSSQCIETYDKLLDGENYDK  
LLPWEIESHPDQSKPAPPDPINMDDDEKKNFASCTADSR

>CcA |Locus\_ID=BC332\_25948 |Protein\_ID=PHU05126.1 |Protein\_len=377 |  
chr10:178193549-178210718 |strand= -  
MVKSVMESGELSCGQSDVVISHLMNGRGKIYPTFIKNDRHVELHMLCVDSNNSRPILRVKVVRRSLKKASTSTLPPPPPP  
VDDTSMEDCMGDEWNNSEDYAEKECGGAEDRQFEPQGSFSFSDGTNLFVGQIFKDKNVYVILNIMNTAIIAKSSGVR  
KGAWTEEFDFLLRKCIQNYGEGKWHLPVIRAGLNRCRKSCRLRWSLIAGRLPGRTANDVKNYWNSHLQKKLITAPHRQER  
KYSTALKITKKNVLRPRPRTFSSSAKNNISWCTNKSTVITNTLDKDERDKEIGLNICQKLTSETSSSTIDGCVHWWTSLL  
NCKEIEEDVAAVGIFEEKNLVPSLLHDEINSLTMQQGQSDGWDDFSADIDLWNLLN

>CcBLIND |Locus\_ID=BC332\_29076 |Protein\_ID=PHU03825.1 |Protein\_len=315 |  
chr11:247145324-247147354 |strand= +  
MGRAPCCDKANVKRGPWSPDEDAKLKDFIHKFGTAGNWIALPQKAGLRRCGKSCRLRWLNLYLRPNIKHGFDSDEEDRIIC  
TLYANIGSRWSIIAAQLPGRTDNDIKNYWNTKLKKKLMGLIIPNNNNNNNNFINIQKSPHFLSTTTTTTSFHQAQQNLGPL  
ITGLEQPIISSAQQNILPNMMIMTNNYNFPNFGATNYNLQNYPKFEANCLQNYSQFGEVASCSSSDGSHCSQMSFGNKEI  
NNNIKREEIMRFGQTI FEGINNQFNLDYYGTMEQLATNCCTNGNGSTSISSNNLLLYNDENCNKSNEIGMFY

>CcMYB1 |Locus\_ID=BC332\_04984 |Protein\_ID=PHU26652.1 |Protein\_len=340 |  
chr02:149207548-149209010 |strand= -  
MGHHCCSKQKVKRGLWSPEEDEKLKHITTHGHCWSSVPKLAGLQRCGKSCRLRWINYLRPDLKRGCFSEQEERIIIDV  
HRILGNKWAQIAKHLPGRTDNEVKNFVNSCIKKKLISQGFDPNTHNLSRAAAAATPPHRNNKKKTNNHHTTSSVFTIET  
SLSPSSTKELVSMMDIKASLAALSPFPHTNSSTTVLTMPQFQTSWSHLYESACNYYNHVPIKTNIVYQNHSTSTGTFGII  
NENCMWGVTFEPHHEFGPSNNIGHEEMQGAQVQLQEEHCLEEVYKVNDLHEFNKHGRIAEVTFDDSSDFDFEFVDSE  
LIPCGIYTNVNSIDQLAWDC

>CcMYB100 |Locus\_ID=BC332\_00785 |Protein\_ID=PHU28692.1 |Protein\_len=240 |  
chr01:18958016-18958738 |strand= -  
LKCLFCRWSLISEHLPGRTDNEIKNYWNSHLRKSVELRIPSDEKLPAVVELAKKGKQKQFIKQRCKRKTNASVLNSTS  
ETAVPITPRLNIEKETPNTIGNGDNNAMELDRNDHQMLWHDDIVLMDDKDAEIDEDFIFNCLWNDEGENLELVEKNNNNN

NEIFGEDSYGTLNCWDWEYLGEILNNETLASTQEAGQENNGMSSVSIFDMNDNMPNCMNEEATVENIDLMQSDLVNWLLS

>CcMYB101 |Locus\_ID=BC332\_16135 |Protein\_ID=PHU14930.1 |Protein\_len=281 |  
chr06:203262885-203264828 |strand= -  
MGRSPCCEKAHTNKGAWTKEEDQRLISYIRAHGEGCWRSLPKAAGLSRCGKSCRLRWINYLRPDLKRGNFTEEEDELI  
LHSLLGKNSVIAGRLPGRTDNEIKNYWNTHIKRKLISRGIDPQTHRSNLTATISTTTAIPTTTTTKNINMDFENV  
DQKPNIIATSSSYDETKCSSGTTEETKPLDIIPKIPSSQVMINLELSIGLPLHTDHISSAESTASYNFLATVAPPPTVAVP  
VVATASETVAKTVCCLCWQIGYQGGTQYCGKCKNTTGFYRY

>CcMYB102 |Locus\_ID=BC332\_33436 |Protein\_ID=PHT97629.1 |Protein\_len=269 |  
scaffolds:121483-122793 |strand= -  
MGRSPCCEKAHTNKGAWTKEEDERLIAYIRTHGEGCWRSLPKAAGLLRCGKSCRLRWINYLRPDLKRGNFTEEEDELI  
LHSLLGKNSLIAGRLPGRTDNEIKNYWNTHIRKLLSRGIDPTTHRPINPSTTQKVTTISFAGGDHKTCDIEDQDYKM  
INVKAESGLSQVEDEINSSPFREQFDLNLRLISPPSRQNYQQSHHVQDLKQSPTRCFACSLGIQNSKDCNCCKNNNNN  
NNNMGNIASYNFLGLRANGVLDYRTLET

>CcMYB103 |Locus\_ID=BC332\_02487 |Protein\_ID=PHU30394.1 |Protein\_len=272 |  
chr01:193658210-193660316 |strand= +  
MGRKPCCSKEGLKKGAWTAKEDMLLTEYIKEHGEGTGWRALPKKAGLLRCGKSCRLRWVNYLKPGLKRGFTFTPEEDDLIV  
RLYTLLGSRWSLIAGRIIPGRTDNDIKNYWNTHLLKLLKAQGNPRRHKSIRKSKEKEKASSQKKQTRNQKTKERKKRKI  
AENDSNIEEREQVAKTTEQLQMDFSQAVSENNYNFTGSSCSQDGTSSGASTSEINLEENNYNSGIYEKFQVIDELLN  
DQWTEYNNESHMMLKEIYEEYFQLVSKNSLSF

>CcMYB104 |Locus\_ID=BC332\_00057 |Protein\_ID=PHU27964.1 |Protein\_len=260 |  
chr01:682911-684231 |strand= -  
MGRAPCCAKEGLRKGPWSSQEDSLLTNYINQHGEHWRSLPLNAGLLRCGKSCRLRWVNYLRPGIKRGNFCEDEDDLIVR  
LHSLLGNRWSLIAGRLPGRTDNEIKNYWNTHLVKLLKNTGIDPKPLKNFPRRKKTQKEGKKCKSQNSKGQSVQVEKIKVF  
APKPIRISCVNSRDNSFENDTLSTSCSSNSNFEEVDVRKEKENEVNFARDLDFGELLKGDEFCEFLMGESCNSFSKCP  
FSLDDNMVEKVYQEYLLLLS

>CcMYB105 |Locus\_ID=BC332\_20335 |Protein\_ID=PHU08475.1 |Protein\_len=277 |  
chr08:3613207-3615399 |strand= +  
MGRAPCCAKEGLRKGPWSTKEDLLLTYIKENGEGQWRNLPNKAGLLRCGKSCRLRWVNYLRPGIKRGNFSQDEDDLIIR  
LHSLLGNRWSLISGRLPGRTDNEIKNYWNTHLIKLLKIAGIHPKVHKIFNKKEPKKKPKSDKPRKKQDKKKKNNKKDQS  
LVNNNNNDTPQVVFVPKPIRLMRNYSVEMLSRPCQIFKFMHASALLKSQNNAASSSDNSEELAENNNKNNINIITKDDE  
NFLFDEFCDFSNESMVDKVYEEYLQLISEKCYDPMML

>CcMYB106 |Locus\_ID=BC332\_27082 |Protein\_ID=PHU01831.1 |Protein\_len=173 |  
chr11:1075349-1076543 |strand= +  
MRKPGCDYKEEMHKGWSKQEDQKLIDYITKHGEGCWRDLPKAAGLLRCGKSCRLRWVNYLNPNLKRGNFSEDEDDLI  
LHALLGNRWSLIAGRLPGRTDNEVKNYWNHLRRLIKMGIDPKNHNISHYLRIRKLEYFQENSIKSENNAVISDATSSN  
CVTSSLPDLNSLP

>CcMYB108 |Locus\_ID=BC332\_14002 |Protein\_ID=PHU18307.1 |Protein\_len=317 |  
chr05:223881846-223884303 |strand= +  
MDHHQKIEVDSGRGGGRGGDYTKNNQEIREDIVMDLRRGPWTVEEDFTLINFIAHHGEGRWNSLARCAGLKRTGKSCRL  
RWLNLYLRPDVRRGNITLEEQLLILELHSRWGNRWSKIAQHLPGRTDNEIKNYWRTRVQKHAKQLKCDVNSKQFKDTMKYL  
WMPRLAERIQAAAASNPATASSGPPTTTYIQNQEIQHSLPNMNHMSDYTPIPFIEKTNSLNYSATSASSDNYSSDLTD  
GCYNFPINQSNQDYSQVNQSTNQMCYGESTINPTSDFHHGFQGFQEVQQNNTQWMDNPWNIEDVCFLQLNNDM

>CcMYB11 |Locus\_ID=BC332\_27759 |Protein\_ID=PHU02508.1 |Protein\_len=419 |  
chr11:26930576-26932692 |strand= +  
MGGASTSMGMFFADMNSLSINTPKSVDEGKGRKGSWDFQFLNKGGAVFSCCNLDEVQNSEENNESIDLNASCYNEEKQI  
TLHSTFNSNNSSGGGNGKETESGQSKLCARGHWRPAEDAQLKELVAIYGPNWNLIAEKLEGRSGKSCRLRWFNQLDP  
RINRRASFEEEEERLMAAHRLYGNKWAMIARLPGRTDNAVKNHWHVIMARKYREQSSAYRRRKMGOVFYRRSTLVVEEA  
DSGKAQAPIISCQNSVNQFGATANTSVKINNDGPNEAAAATPSSTNNVTLLSPYSPFCAPPFDSLPAHGCGNEMMNILNQ  
QGNKSWDRKMEITHHHQHHHTPPSNLMMMNMSMQQSQYLQFPYVTTSTRTQISSPSAAQAEVLVKEEDRRSSSSNNNNN  
SDNSTIAPPFIDFLGVGAT

>CcMYB110 |Locus\_ID=BC332\_18300 |Protein\_ID=PHU11370.1 |Protein\_len=214 |  
chr07:28014303-28015172 |strand= +  
MKDKEVKTRMKRGFWKPEEDLILKNCVETHGEGNWATISEKSGLLRSGKSCRLRWKNYLRPNIKRGMSEDEKDLIIRLH

KLLGNRWSLIAGRLPGRTDNEVKNFWNTHLNNKRSCGKKKKHVKSKEANTHSPQGKTQQCPAETVRNQEVATKTVLDSWI  
EEMQDFNCSSLSPVMNNMPFLEDEPFIPILDDIVLLEAFTSTGKEAWSEIQTFL

>CcMYB111 |Locus\_ID=BC332\_18314 |Protein\_ID=PHU11384.1 |Protein\_len=277 |  
chr07:30180883-30184740 |strand= -  
MKVTEMRLGWICGLTKKDSVINETIRDKVGVTSVKEKMQLRLRRFEHVMKRLTAERKSKSAMKDKEVKTRMKRGFWKP  
EEDLILKNCVETHGEGNWATISEKSGLLRSGKSCRLRWKNYLRPNIKRGMSEDEKDLIIRLHKLLGNRWSLIAGRLPGR  
TDNEVKNFWNTHLYNKRSCGKKKKHVKSKEANTHSPQGKTQECPADTVSNQEVATKTVLDSWIEEMQDFNCSSLSPVMNS  
MPFLEDEPFIPILDDIVLLEAFTSSGKEAWSEIQPFL

>CcMYB113 |Locus\_ID=BC332\_30875 |Protein\_ID=PHU01088.1 |Protein\_len=352 |  
chr12:191929956-191931822 |strand= +  
MGRKPCCSKEGLNKGAWTPIEDKILIDYIKVHGEGKWRNLPNRAGLKRCGKSCRLRWLNLYLRPDIKRGNISPDEEDLIIR  
LHKLLGNRWSLIAGRLPGRTDNEIKNYWNTNIGRKLQEAKGSGQPNRVTSYRQRNRSSHAKSANPSPITQLQONNQEQT  
VQQDSNCLLQTDVREGSSSSSSSTCLVVCNKAIWCTKIFISPQNTDQSVNEITQIDNNDKAMTEENATTNIVTSSSSSL  
EQQQQPVSESYSPTNLSVEMENYNFMFMGLDVEDPFLSELLSVPDLRDQILENSTISSTVDAGDEVGDCNISVKKERQR  
SYFPPSSSQISIFSEGTQHNDLELWIDGFSSC

>CcMYB115 |Locus\_ID=BC332\_34193 |Protein\_ID=PHT96881.1 |Protein\_len=258 |  
scaffolds:31973-33059 |strand= +  
MNTPIICTTSLQVRKGAWNEEEDFLLRKICIEKYGEGKWHLPARAGLNRCRKSCRLRWLNLYLRPHIKRGDFDPDEVDLIL  
RLHKLLGNRQFYVLDSPKFAGSSHLKVNDIRDLWSLIAGRLPGRRTANVVKNFWNTRLLRKVNIAPIINNKGDNINTKNE  
IIRPQPRNFSSTMKNVSWCNKSIINEANILENCYEIEEAIATGTRTPLCKNISSEKNCNEIDKTPCFLNGGGNAMQQGQ  
SDGGWDEFMSDDIWNLLN

>CcMYB12 |Locus\_ID=BC332\_23833 |Protein\_ID=PHU07344.1 |Protein\_len=356 |  
chr09:154409265-154416480 |strand= +  
MENDTAEVQEVTVAVNGFYGGGDDEVLITEDGSGKKNADRVKGPWSPEEDAILSRLVSNFGARNWSLIARGIPGRSGKS  
CRLRWCNQLDPAVKRKPFDDDEDRIILQAHAIHGKWKASIRLLPGRTDNAIKNHWNSTLRRRCAELGRLRSDSSNVMED  
VSVEKSKASSEETQSCGDVNSLKAIEGKDVSEENQEDNLYEDKSQGDVQQSDAANDPHTLFRPVARVSAFSAFGSLNVP  
ESQLQTPRLIPVQAPDLGISKLLEGAFTRDLVPHQCGHGCGNGNQAINGSSLLGPEFVDYDEPPSFSSHELATLATEIS  
NVAWCKSGLKNSSIEVIFNPTTRAVCGASHLSPRP

>CcMYB13 |Locus\_ID=BC332\_13912 |Protein\_ID=PHU18217.1 |Protein\_len=398 |  
chr05:220340289-220346172 |strand= -  
MNENAESNFSAVAVTAAVENVSFEGDAVLHGGGSEGNGGNASVDGNGGDDFVDDGGDVEMSESGRGNRVSSGRVKEPW  
SREEDLVLMEIYKFGARNWSMIAQGIPIGRSGKSCRLRWCNQLDPLLKRKPFTDEEDRIIINAHAVHGKWKASIAKLLPG  
RTDNAIKNHWNSTLRRRFAEVRVVKPLCSVMLDDSIDNAKVLFEIYKSHGDFNQIKPLEMLEGSRACMSSQSEDKTQIY  
EIYDIPEKSPNFVSERSCSTSVNSDPSASRPTEKIGGFYVCNPSATSRIVPMQGPLIHTFSPDFDICKLLEGCVSAGET  
TVPQCGHGCAASTNSSFKSLLGPEFVEYEEHPPHLGHELASIAATDLNNIAWIRSGLEKAGELRNSRHSSTQVGFG

>CcMYB14 |Locus\_ID=BC332\_31012 |Protein\_ID=PHU01225.1 |Protein\_len=242 |  
chr12:206743102-206743830 |strand= +  
MKTVELIRVKGPKWKEEDELQKLVEEHGAKNWSIIGKSIPGRSGKSCRLRWCNQLSPQVEHRPFTRDEDDKIIKARAE  
FGNKWATIAIRLLSGRTDNAIKNHWNSTLKRKCPMSMEDLSFDNPQPPLKRSASVGPSPMMPGSPSGDLSDSGLSGSGS  
LDLPLPLVYRPVPRTGICIFPLPPPPAPSPDPPTSLSLSPGVSVPVSGSGFEKPRQSPQTPPLPPPQPPFAAVEKPIP  
PPAPVLSSTPPFMAQVPQTQQQSYEFCAPKSGEKQFFSPEFLSVLQAMIRKEVKSYSMSGFEKNGFCLQTDAIRNAVIKRI  
KID

>CcMYB16 |Locus\_ID=BC332\_11900 |Protein\_ID=PHU20749.1 |Protein\_len=326 |  
chr04:224752264-224753244 |strand= -  
MAARKDSRIKGPWSPEEDELQSLVEKHGPRNWTLSKSVPGRSGKSCRLRWCNQLSPQVEHRAFTPEEDETIIIRAHAK  
FGNKWATIAIRLLSGRTDNAIKNHWNSTLKRKCPMSMEDLSFDNPQPPLKRSASVGPSPMMPGSPSGDLSDSGLSGSGS  
LDLPLPLVYRPVPRTGICIFPLPPPPAPSPDPPTSLSLSPGVSVPVSGSGFEKPRQSPQTPPLPPPQPPFAAVEKPIP  
PPAPVLSSTPPFMAQVPQTQQQSYEFCAPKSGEKQFFSPEFLSVLQAMIRKEVKSYSMSGFEKNGFCLQTDAIRNAVIKRI  
GISKIE

>CcMYB17 |Locus\_ID=BC332\_01622 |Protein\_ID=PHU29529.1 |Protein\_len=303 |  
chr01:74523210-74526775 |strand= -  
MSEIKKGPWKAEEDEVLIKHVKKYGRPDWSSIRSKGLLQRTGKSCRLRWVNKLRLPNLKNVGFSAEEERTVIELQAQFGN  
KWARIATYMPGRTDNDVKNFWSSRQKRLAKILRNPPQPNKPQKCIHREAPPATQKVPSVEAPKLNSSAEERPLSMSQDC  
SSSYMNNFETTSMPVPLRELVNSTSLPFEQELLPLEFTPNEKRTSIWPQFPLSFPQIPLQTTFDHPLGHQELPMKLEDTNF  
LDYFDMGNVQVPLAPSCSGQERTSEIAMKREIMDYPLTPDSFIHDFPMDMFDYIDPLPSPSEW

>CcMYB19 |Locus\_ID=BC332\_15639 |Protein\_ID=PHU14434.1 |Protein\_len=505 |  
chr06:158086817-158091007 |strand= +  
MSMTSESDDRMASQDGVDSPEVEACGGGITGGGLPLKKGPWTS AEDAILMDYVTKHGE GNWNAVQKHSGLARCGKSCRL  
RWANHLRPDLKKGAF TPEEERRI IELHAKMG NKWARMAAELPGRTDNEIKNYWNTRIKRRQRAGLP IYPPDISFQAISEN  
KQNEELGAFSSTDSQYPDFLPMNFEIPAVEFKRLEFNKQLCPPALLDIPNGGILDIPGRSLLA QGLNSAYYSRSFLSTM  
PPAKRIRGAESLFSG LNGDCSPSKNEGSFPTCHQYQEDGSLLAQSMGFSSSFNQNLTSVHHPSSSGVIPGSHAPLNGKTS  
SSEPLWAEKLELPSFQSQMASWGLSSSPLPSLESVD TMIQSPTEHTESC NLSPRNSGLLDAVLYESQTM RASKSILHQE  
NSGDVVDNSCPDLHETGWETYGDPISPLGHSAASVFSEYTP TSGSSPEEPQLVTMPGCKVKQEKFD FGPYDGKEDASDLI  
FSRPDYLLESNCFGHMQKTARSIWH

>CcMYB20 |Locus\_ID=BC332\_01521 |Protein\_ID=PHU29428.1 |Protein\_len=509 |  
chr01:67429296-67432913 |strand= -  
MSITSETDDMTSKVMDSPDEASGGESVPLKKGPWTTVEDAILVDYVMTNGEGN WNAVQRHSGLARCGKSCRLRWANHL  
RPDLKKGAF TPEEERRI IELHAKMG NKWARMAAELPGRTDNEIKNYWNTRIKRRQRAGLPVYPPDISFLANQNKQNEELG  
AFSSVDAQNSNVLGINNFEIPAVEFKNLQLNHLLYPPPLGEIPAVSSFLAQGHRAPYGSTYLLSTMHPSKRIRGSESMFS  
GSNGDLLSSSQYHNGGSLLAQPLGFSSYNHHLT YDDDRSFSSVVHGGHAC LNGNSSSSEPTWAMKLELPSLQNQTANWG  
SPPSPLPSLESDDILIQSP PAGNSESGSLSPSNSGLLDAVLYESQTMKASNDNSHQGKETSGDAVNKGWESYGD PVSP LH  
HFSASVFGEYTPVNGSSLHEFP SVATMPGCKIKKEIGDLAPLDENDDSLNQTIFSSPKTQHAKNSLALKEVISSGFFDDC  
GWDCKQIRAVATSSGQACGCSSWDAMSAV

>CcMYB21 |Locus\_ID=BC332\_31637 |Protein\_ID=PHT99442.1 |Protein\_len=486 |  
scaffolds:6937567-6940075 |strand= +  
MATNDRGMKNSSGKNGGGRQVVKGPWTTTEDITLMEYVRKHGE GNWNAVQRNSGLMRCGKSCRLRWANHLRPNLKKGA  
FSPEEERII IELHAKIGNKWARMAAQLPGRTDNEIKNYWNTR LKRRQRANLP IYPQELQSQNQPEHNQAQQSLISSAFDP  
QRTTYNNPPSLSLGILNPSSMRPPITHQFPLNGNKNFRNPPKGLSMTPPSSMQNSQFSSLPVSVSNNNF GHDLFNSTPM  
PSFQQTYPDFSSTMRPFLGNIPSNQNGLMFDMGINSINYP SGQLSMPVTTSSSENTSSGFGSSDANNYTNVGGLSRGNS  
GLLEDLLEESQTLTRAMKIEERGKSLWENYGLVEKELGDHQDGAIFTEESVYSFAHGDDVTLYNNSESSSSNPNASPGTI  
FKKEGSLKGTNQVDEDL MCLLDSFPLGVSVPDWN DHNSKIASDDYKAENLTEDSINSQVIIT TNSGSKKHELGLEGCCWY  
NMPSFC

>CcMYB22 |Locus\_ID=BC332\_24264 |Protein\_ID=PHU07775.1 |Protein\_len=479 |  
chr09:238380291-238383963 |strand= -  
MAPNGGGVKNKNNNGTSIGNHNTRQVLKKGPWTTTEDITLMEYVKKHGE GNWNAVQRNSGLMRCGKSCRLRWANHLRPHL  
KKGAFS IDEERLIVELHAKLGNKWARMAAQLPGRTDNEIKNYWNTR LKRRQRAGLP IYPQDIQPQNYQQDQDQNHSTNIP  
SPFDNNHQNSYNNNNNSPLSLDIFNPSTMKPSRNII PHQYQFNNNNPTSSFLTNTNINNQVKFFRDPRVLSLTLASS  
MKNSQLPSMIAPVNNFSQGYSSSIPAPPLQHNPFTTTTTRPFGISSNPNGLILGMGTEQRSIQLSMPETTTTTTSSD  
HADNNYVVERGLSRGNSGLLEDLLEESQTLTRGEKIEENCVDNEDNKGLVWEEYGLTEEAADAILTEESTYNFAHTDD  
NNATQSKHSEDSSSLNSSSGITTKEASLELGNQVDDDIMRFLDNFPLGVPVPDWCDQQNTSNAQSFEC DQIQLSKSSS

>CcMYB23 |Locus\_ID=BC332\_06584 |Protein\_ID=PHU21477.1 |Protein\_len=260 |  
chr03:8824259-8825764 |strand= +  
MVCEIIEQMGSNWGFIEEVWRKGPWTADEDRLLIEYVKLHGEGRWNSVARLTGLRRNGKSCRLRWVNYLRPDLKRGQIT  
PNEEKI IELHARWGNRWSTIARSLPGRTDNEIKNYWRTHFKKKTKNSCDNSEKSRASLWKRQFQLQQQQQQQIKNQID  
IKKVMSLPTMAQAKQEMAILYPN IYTDQQDQVGLFYSLNNSTSI SQSEPSSSNEDIMWDDLWNLD DFFYGHFINSTTYN  
KTNTSPCLQPMAS TTTPSFY

>CcMYB24 |Locus\_ID=BC332\_05804 |Protein\_ID=PHU27472.1 |Protein\_len=257 |  
chr02:163662294-163663398 |strand= -  
MVAMMGWGANS DQQGWRKGPWTPEEDKMLSEYVKLHGEGRWSSVARCAGLNRTGKSCRLRWVNYLRPGLKRGHITPQEEG  
IIIELHALWGNKWSTIARYLPGRTDNEIKNYWRTHFKKKEKASGQDKRK IIRQKNQPQPNCTIATIDKKLSPQAEVV I  
MKSDDSNAYTNYHKNIMDQDPVVELPPVTTCSDTSYAWTDTFLMDGLWGGLWNLDHSLMQATNDKCKVANIQNQPANC  
TYATDYAVNLHNGGFI F

>CcMYB25 |Locus\_ID=BC332\_14907 |Protein\_ID=PHU13702.1 |Protein\_len=238 |  
chr06:14503832-14505369 |strand= -  
MAQEEMRKGPWTEQEDLQLAFYVNLFGDRRWDFLAKVSGLRRTGKSCRLRWVNYLHPGLKRGKMTPQEERLILELH SKWG  
NRWSKIAMKLPGRTDNEIKNYWRTHMRKKAQDERKNKASTISPSSSFSSNFYSNSPDVDFTPIMENNERNFYDTGGVE  
KKINDGGKMKVYSMD EIWKDIELSESE TMNNIKPIMSSPLWNYCPNNTLWMSDEEETKMFPQFYNCLDNQDNTFFAG

>CcMYB26 |Locus\_ID=BC332\_14908 |Protein\_ID=PHU13703.1 |Protein\_len=189 |  
chr06:14885819-14887203 |strand= +

MAQEEMRKGPWAEQEDLQLAFYVNLFGDRRWDFLAKVSGLRRTGKSCRLRWVNYLHPGLKRGKMTPEERLILELHSGWG  
NRWSKIAMKLPGRTDNEIKNYWRTHMRKKAQDERKNKASTISPSSSFNSSSSFYSNSPDVDFTPSTEDNERNIYDTGGFQ  
KNVAENMKVYSMDEIWKDIELSEENETMC

>CcMYB27 |Locus\_ID=BC332\_17123 |Protein\_ID=PHU15918.1 |Protein\_len=228 |  
chr06:231916922-231918274 |strand= -  
MDRTRRSSASILCEDVWRSSLGFSGESFRFEVWGRERKNKLGLKRSKGKSCRLRWVNYLNPGLKRGKMTPEEQVLVLQQLHS  
KYGNRWSKIAKLPGRTDNEIKNYWRTHMRKLAQDEKNNKASISPSSSNFNSCSSSSANSAPVDSSTEQNELLQVVEAN  
KTYEEDQNMVYSMDEIWKVESSQEIETRNDLPVMASNTWDYCPDSLWMTDHYYYDNTQDFSFFTG

>CcMYB28 |Locus\_ID=BC332\_22951 |Protein\_ID=PHU06462.1 |Protein\_len=206 |  
chr09:5239565-5241556 |strand= +  
MQEEKLRKGPWLDEEDERLAFVVSILGERHWDALAKASGLRRSGKSCRLRWVNYLRPNLKHGQITEDEENLIILKQKQLG  
NKWSKIAKQLPGRTDNEIKNYWRSHLRKKALIYEQECFGSNNTSQSGSQPKLSFAKDDNCQSFDDGEEESSRLLDWMIPSW  
TYEQSQMEHHMYLCKILNLCSCNYSSQDENISSTWDDASSSSIWEY

>CcMYB29 |Locus\_ID=BC332\_26333 |Protein\_ID=PHU05511.1 |Protein\_len=206 |  
chr10:209309844-209310891 |strand= -  
QLTMQEEELRRGQWLEEDERLAMIVAISGERRWDALAKDSGLKRSKGKSCRLRWVNYLHPNLKHGHITADEERLIIRLQK  
QFGNKWSKIAKQLPGRTDNEIKNYWRSHLRKKAPVYEQECFEDNTSNSEQSSISNCATVLNSSNSDDSFSEKGCYSAD  
SLANEVTLTDGIPSWSYEQSRMEHHMYFCSSNLCSCYAPWTSEDNN

>CcMYB3 |Locus\_ID=BC332\_04434 |Protein\_ID=PHU26102.1 |Protein\_len=345 |  
chr02:136506858-136507895 |strand= +  
MDRVKGPWSPEEDELLQQLVQKHGPRNWSLISKSIIPGRSGKSCRLRWVNYLSPQVEHRAFTPEEDETIIIRAHARFGNKWA  
TIARLLNGRTDNAIKNHWNSTLKRKCCSLADEGKELADQIFENHQPPLKRSVSAGSAMPVSGFHFSPGSPSGSDSDSSL  
HVTSSSQSHVFKPVAKTGGIFPPPSIDISSPIDPPTSLSLPGADLAELSSRSAESTQSKNPFQLSLPPPQVPPPPPP  
PPPPPPQPQPVTAVPFEQQDKVFPVFSQELLRVMQEMIKTEVRNYMMGIEQKQHPQQQHYQQQQFQQQTHQLPSGLGL  
GLCMQQASDGYRDRAANRMGISKFD

>CcMYB30 |Locus\_ID=BC332\_14493 |Protein\_ID=PHU13288.1 |Protein\_len=231 |  
chr06:45830-46775 |strand= +  
MEASMEMKKGWSSDEDSKLIHSISLLGQGRWDSLARFAGLKRSKGKSCRLRWVNYLRPNLRRGKITPQEQLLIILLHFRF  
GNRWSKIAENLPGRSNDNVKNYWRTKVQKHAKELHCNVNNSHQFRHFLYQWLPSLLAQILPTTPSSPNNMTCPNAD  
FISSPEDDNTYNIWNLLSSFEDEINISHDYSIPTDDEYYCHNYWPTTPSQVLLPDEMLCLDDMDLWLFP

>CcMYB31 |Locus\_ID=BC332\_19185 |Protein\_ID=PHU12255.1 |Protein\_len=199 |  
chr07:199954179-199960897 |strand= -  
MVRTPCYDENGMMKGTWTPEDRKLTAIYIAKYGSWNWRQLPKYAGLARGKSCRLRWVNYLRPNVKGNYTKEEDEIILN  
LHAQLGNRWSAIAAHLPGRSNDNEIKNHWHTKLKRGTNYATNSSDESSKKCKNNTKKRYTESNTNKNSTSHNNMQENIVLE  
SSEWSPKESSEELSSYSTTNYQQQHKVFQEEITSGSFW

>CcMYB32 |Locus\_ID=BC332\_03892 |Protein\_ID=PHU25560.1 |Protein\_len=196 |  
chr02:114442162-114445894 |strand= -  
MDKRPCNSQDAEVRKGPWTMEEDLILINYIANHGEVWNSLAKSAGLKRTGKSCRLRWVNYLRPDVRRGNITPEEQLLIM  
ELHAKWGNKWSKIAKHLPGRTDNEIKNYWRTRIQRKHQKQENVNGQGTSEQNIDHQEGSSSQMSAGQVDTIETYSPTS  
NGNMDANFQAPNFLTETNDNMWSMEDIWSMQLLHGD

>CcMYB33 |Locus\_ID=BC332\_05936 |Protein\_ID=PHU27604.1 |Protein\_len=170 |  
chr02:165584056-165586781 |strand= -  
MDKRTCSQDVEVRKGPWTMEEDLILINYIANHGEVWNSLARSAGLKRTGKSCRLRWVNYLRPDVRRGNITPEEQLLIM  
ELHAKWSKIAKHLPGRTDNEIKNYWRTRIQRKHQAENMNLSSDISDQHNNDQASTSQASIGPPDTIETYSGNNNNNN  
NIMGSNFHHQ

>CcMYB34 |Locus\_ID=BC332\_27190 |Protein\_ID=PHU01939.1 |Protein\_len=287 |  
chr11:3303339-3304807 |strand= +  
MSSNNNNNNLSSNEDELFLRRGPWTLEEDNLLIHYISTHGEGRWNALAKCAGLKRTGKSCRLRWVNYLKPDIKRGNTLP  
QEQLLILELHSGWGNRWSKIAKHLPGRTDNEIKNYWRTRVQKQARQLKVDNSKKFVEAIKNLWVPRLLKMEQCSSSST  
IDKKQINNLSPNLPINNQESCTKDNKSSHDDNTNTNSNNNTTWGSLGSSMNENFNICNNSMHQDDECYYVENNFNQ  
QPQHFSYQEMSISECDEVAEADWFTNEGSLWNMDELWQFKKLGVDI

>CcMYB35 |Locus\_ID=BC332\_09701 |Protein\_ID=PHU24594.1 |Protein\_len=293 |

chr03:262562871-262564270 |strand= -  
MERDMSFSLKTSSSSSSSDDDIELRRGPWTIEEDNLLVHYITNHGEGRWMLAKHAGLKRTGKSCRLRWLNLYLKPDKVGRGN  
LTPQEQLMILELHSLGNRWSKIAHYLPGRTDNEIKNYWRTVQKQARNLKIDANSAAFQEMIRYLWIPRLQLKIQSSSS  
VMPSIQSPQSTPQDFNIEKNSTNTSSSSSSSHSSNIYNSTNIMSECPKIPPRDIGSDSLNSFVKAHFPVDDNSYDVDN  
YGQLATGNYYNDVMDYDQMSGDQNKLTGDLVSDSFWSNMDEFFYQKQDMSHCR

>CcMYB36 |Locus\_ID=BC332\_31414 |Protein\_ID=PHU01627.1 |Protein\_len=292 |  
chr12:224158300-224159991 |strand= +  
MNHYSQYVDNNQKSDEETNNLDLKRGSWTIEEDFTLMNHIALHGEGRWNSLARSAGLKRTGKSCRLRWLNLYLRPDVRRGN  
ITLEEQLLILQLHSRWGNRWSKIAQHLPGRTDNEIKNYWRTVQKHAKQLKCDVNSKQFKDTLHYLWIPRLVERIKASTN  
SNNNQVNNIQQTNVDNIISNNNNNNNNNNNIVQNMNFQKENYSSTTTTSSENSFGSTQISDMSDNCYTNYPLNQGDYH  
GEILINPTSDYFQHGIIIDNNHQNMSQLFFDDVSDKFWNQEDMLFLQQLN

>CcMYB37 |Locus\_ID=BC332\_31413 |Protein\_ID=PHU01626.1 |Protein\_len=269 |  
chr12:224147657-224148659 |strand= +  
MDKIRENNIVELKRGWTVVEEDFILVNYIAHHGEGRWNTLAHCAGLKRTGKSCRLRWLNLYLRPDVRHGNITLEEQLLILQ  
LHSRWGNRWSKIAQHLPGRTDNEIKNYWRTVQKHAKTLKCDVNSKQFKDTLHYIWIWIPRLVERIQASKQNNNSIRVAQQ  
SVLRTGITELVPIQLANNSNNNNNDNNNSNYLSASVTPENSSSVATSSSENSIGTTQVSHNQDYYQANQSDYHHQLWFEDNYQ  
AMDQQNSIQLWMDNEDVFDNLNCNIEDIWS

>CcMYB38 |Locus\_ID=BC332\_08081 |Protein\_ID=PHU22974.1 |Protein\_len=279 |  
chr03:207146556-207148956 |strand= -  
MGCKAAEKPKQKHKKGLWSPDEDDKLKNYIIKHGHGCWSSVPINAGLQRNGKSCRLRWINYLRPGLKRGAFSLEEEDTIL  
TLHAMFGNKWSQIAQHLPGRTDNEIKNHWSYLKKRVTKMAENEGDTKSDNTESSPSLKKLTQNSSLDSFEHREGSLAD  
SDQSIYPRESQKSNLPKVLFAEWLSLDQFNGQEFHNSGNFEPSTNNFGYNNSELHDIIFMHSLPMNNGSYGNGVNVQEVNNG  
TVVDDIFQAQLKFEDPMSANGFEFMSGEFNINDVMI

>CcMYB39 |Locus\_ID=BC332\_02119 |Protein\_ID=PHU30026.1 |Protein\_len=280 |  
chr01:166163058-166167683 |strand= -  
MGCKQMDPKPKQKHKRLWSPYEDHKLKDYILKHGHGCWASVPINAGLQRNGKSCRLRWINYLRPGLKRGTFSTEEETIL  
TLHGMGLGNKWSQIAQHLPGRTDNEIKNHWSYLKKSVMKAKTYSENAEESSSMKLVSCKSSNLGSEFELVEGALLADID  
QSTLHVQLPQENRECNLPKVLFEWFLSDQFNVQDFKNTIKQHHSKNNGYGCNDSVFLDAFAQYGPLLAMNEAITYGNDI  
NGGFNNMFQPLKFDDQIFVNGFEEFISGEFNVNGGVMI

>CcMYB40 |Locus\_ID=BC332\_02384 |Protein\_ID=PHU30291.1 |Protein\_len=366 |  
chr01:185358207-185361437 |strand= +  
MRKPEHNSSNPSPSTMMKEKEKEKGNKAKLRKGLWSPEEDEKLMNYMLTNGQGCWSDIARNAGLQRCGKSCRLRWINYLR  
PDLKRGAFSPQEEELIVHLHSILGNRWQIAARLPGRTDNEIKNFWNSTIKRKLKNNNNNNNNHNNSTPSPNASDSSSDP  
RALVGGIFPMQGHVNVMAAFMDNSSSTTSGSSMQAMVPSNHFNFPQLDNTSYDISGLVGPVNLGQFGCNGCDGGFLD  
YGVEETYSMMGLESEFVPLGGVHKSTMGENNNNNSHVNFSSNIVIGANDYMEKKITNGNNNNNQHLMMMSGSSDQS  
LKVEDYMGVFGNHNHWHGESLRIGFEFDWEGLLANVSSLPYLDQVE

>CcMYB41 |Locus\_ID=BC332\_28534 |Protein\_ID=PHU03283.1 |Protein\_len=357 |  
chr11:213882044-213886319 |strand= -  
MRKPEFSSSSSGKNNNNNTNNNTNVKLKGLWSPEEDEKLMHYMLTNGQGCWSDVARNAGLQRCGKSCRLRWINYLRPD  
LKRGAFPLQEEHHIHLHSLGNRWQIAARLPGRTDNEIKNFWNSTLKKRLKNSSSSSTPSPNASDSSSDHLSKDLNIG  
VTQQRFTMQKHNLMSINMDSTSSSSSMALNTINIDPLPTLDHTLINMSNGFNISPSYLSTTQPCMVQGGNIVGTNNGG  
SLFYGNHGHIFGGNLSMEGHELYVPPLENVSIDYNQNVENGNYVERSNHHQNNNYVNNMSSLNSTSHNFSNNSNIKENF  
GGIGNYWEDELKVGWDLLEELMKDVSPFPFLDFQVE

>CcMYB42 |Locus\_ID=BC332\_25321 |Protein\_ID=PHU04499.1 |Protein\_len=331 |  
chr10:35592237-35593896 |strand= -  
MGHHCCSKQKVKRGLWSPEEDEKLIRHITTHGHGCWSSVPKLAGLQRCGKSCRLRWINYLRPDLRRGSFTEQEERTIIDV  
HRILGNRWAQIAHLPGRTDNEVKNFWNSCIKKKLIAQGLDPNTHLLKNKSNNPTKSDYTYHHQDSTSVFTIDTSTNK  
EVISMDLKSTLATLSPNFPSPDNIITSSTYNYTPIVPIEYQNPFAWNSILDFASNCSLMESTTINLSSYINENKMWN  
GTGLEPTTLNPVNGQEEEMQVLQGDQFPPIIQTKFCHDLEDVYKVNHDQTVENTFDDNSNFDFFEMNSAFVPCGLYTN  
DNSMDQLSWDC

>CcMYB43 |Locus\_ID=BC332\_09604 |Protein\_ID=PHU24497.1 |Protein\_len=381 |  
chr03:260945914-260947886 |strand= +  
MGHHTCCSKQKVKRGLWSPEEDEKLKITYITTYGHGCWSSVPKLAGLQRCGKSCRLRWINYLRPDLKRGFSFPQEAALIE  
LHSILGNRWAQIAHLPGRTDNEVKNFWNSSIKKKLQLSHGTFSDSLIIFPNNNNLIANPNPNPSFDNSNSFNPNVPIT

NSFMSSTNNSSPLIQQLDQMINFPNGDLNLIQVVPYSLPMSFSDSMSNDPTWFNFNYPHHLQHDLEYNPSVIKQDNSNSM  
FTSNISLNCNCTNGENFMDSTNADIKIHQDLMMAPLLLPLKSETIKGNEGGILESTPVASQYIHSMAISSLPCTIPTGYTMN  
PHNNNNVHRVHVHEMKQIESVHMSSSPSSSKSSASGSSSLALSCLSCQFMMNPSGNLPTTWDS

>CcMYB44 |Locus\_ID=BC332\_00146 |Protein\_ID=PHU28053.1 |Protein\_len=338 |  
chr01:2327678-2330911 |strand= -  
MGHHSCCNQQKVKRGLWSPEEDEKLIRYISSHGYGCWSEVPEKAGLQRCGKSCRLRWINYLRPDIRRGFTPEEEKLIIS  
LHGAVGNRWAHIAHSLPGRTDNEIKNYWNSWIKKKLKKPSKPSANTTSITDHHHQSHQRSQVLVNYNTITSQQDIFFTQD  
LGTKSQVLLQDSTLFNSPSQLFFDSSGLDSMTNAIINDATNRSTTTNNASLFFQETSTLNSEFCWQVDQOQQOQLQVQTS  
SYAIGMDSNYLPPLIESMVPPMEIPRNNNNNNNNIMVEGQENNNQLDEWSSQVDTQCCPSYLFWDQENGSIIGGDHEINID  
PTTSNNMGQILSSFPSSL

>CcMYB45 |Locus\_ID=BC332\_08924 |Protein\_ID=PHU23817.1 |Protein\_len=332 |  
chr03:247287194-247288480 |strand= -  
MGRHSCGVKQKLKRLWSPEEDEKLSNYITNFGIGSWSSVPKQAGLQRCGKSCRLRWINYLRPDLKRGMSQDEEDRILG  
LHQVLGNRWAQIAAQLPGRTDNEIKNYWNSLKKKLMKQIDPNTHKPLRENQVIKDEENCTNKTSMFEVPFLNEMDQPF  
TQLASSKDQYVSKQVFDLLFAHEFQSNENNSQTLAQYHDHHHQSEYEENPNYVFCASSVSKLEHGQMTDQDFASSSTSR  
MSSSNSSNMCSNQNTARIRTENSEALSWDVENKMESLFQYPYIGIKNEELRSSPSQERELYGHSSGDFMSNYPLSSLTEE  
LSGANLDVFKQI

>CcMYB46 |Locus\_ID=BC332\_16679 |Protein\_ID=PHU15474.1 |Protein\_len=320 |  
chr06:222540301-222541966 |strand= -  
MGRHSVYVKEKLRRGLWSPDEDEKLYNYITRFGVGCWSSVPKLSGLQRCGKSCRLRWINYLRPDLKRGTFSLSEEDMIIT  
LHEVLGNRWAQIAAKLPGRTDNEIKNYWNSYLKKKLIKQIDPNTHKPLSENHQVRNDTNCTDKASMLLMSTFPNMSNSV  
EIEQPFHFNKIRIFNSEAITRQLTEVSRNQLVSKQVDFPLFLYDFQANMNPIGPYDGNQDFGICSMPLNTNFEHGHMTESD  
FSDSSTRMSTSNRTNTMIRHHSSAGIHQMNEMLENSQELTWDADNKIDSLFEYPYDGIKNEEDFSNNNNNNNNPLSSLL

>CcMYB47 |Locus\_ID=BC332\_22066 |Protein\_ID=PHU10206.1 |Protein\_len=420 |  
chr08:183068022-183069543 |strand= -  
MGRHSCCYKQKLKRLWSPEEDEKLKIHITKFGHGCWSSVPKLAGLQRCGKSCRLRWINYLRPDLKRGTFSSQDEENLIIE  
LHAYLGNKWSQIAARLPGRTDNEIKNLWNSIKKKLRQRGIDPNTHKPLSEVESEEKASANSNNKNNDKVSESSNNEFNF  
VEAHENGFTSTEKGINMERYPLIDHQANNIAPPTHEFFTANCKSPDLSSYLSFHNYSPNTNILFNTKNSSADNMVSDHHQ  
FNCSTLPNATFSTMSNSILSTSPLARTFNINKFQNWEEACTISSNGSNSSNGSSNSIELQSNCSFFDNSNAAAAAFTWGS  
TAAAAAADGSGKQEREEIKWSEYMQTPFSLGVNNTIQQNHHEISPHHQDLYDGETKSETQFMTHGTWLQNQTPQTSLQT  
ADLYSNNNFQRLPAVFGQFS

>CcMYB48 |Locus\_ID=BC332\_25434 |Protein\_ID=PHU04612.1 |Protein\_len=222 |  
chr10:61725009-61726632 |strand= +  
MAQEEIMRRGPWTEEDLQLVFYVKLFGDRRWDFLAKVSGLKRTGKSCRLRWVNYLNPDLKRGKMTPEERVVLELHSKW  
GNRWSRIARKIPGRTDNEIKNYWRTHMRKKAQEQRKSSISPSSFSNSSYSSSISHEENERNFYDTGGLELLKAEGEMK  
SSDQEQGGESMKIYSMDIWKDIELLEENEETTNPIMPISISPLWDYSLDSLWKDFDWSSFR

>CcMYB49 |Locus\_ID=BC332\_11766 |Protein\_ID=PHU20615.1 |Protein\_len=330 |  
chr04:220728386-220729916 |strand= +  
MGRAPCCDKNNVKRGPWSPEEDAKLSYIEQNGTGGNWIALPQKIGLKRCGKSCRLRWLNLYLRPNIKHGGFSDEEDRIIC  
SLYISIGSRWSIIAQLPGRTDNDIKNYWNTKLKKKLFQKQKQKQSRKGKEIKSMSSISTSNLNQNPCWPELQPLPYS  
NNEPRFINNDHTSIRKLLIKLGKFSENDQLTNVVPNSHEYPIDNSSSMQLMYQDHINLISSAPIDHNVFNITAPNIDLY  
NMDGAASNFTAEFEHMINTSQKIDGLEFLYENLVIDKFTSTSGGNLDWESMNPYVLPPIVASSDGGFQQGVIFQQA  
LDELRYPMVQ

>CcMYB5-1 |Locus\_ID=BC332\_08856 |Protein\_ID=PHU23749.1 |Protein\_len=185 |  
chr03:246216986-246219064 |strand= -  
MGEAPSYCSLKNYDSKNEHDHYKQIVGCFDEDFHDMKKDLWTEEDRILIEAHAEIGNKWAEIAKRLTGRTEHSIKNHWNA  
TKRRQFTRRKCRWKWCSPSSILQNYIKSLNFEKGNNSAPKIEPIDQVQPADNYDFGEFDLEDKLFDDLENVPNYCELAQ  
LIMQDAEVNKEVDLMDFISPNENV

>CcMYB5-2 |Locus\_ID=BC332\_08857 |Protein\_ID=PHU23750.1 |Protein\_len=228 |  
chr03:246226646-246227429 |strand= -  
MDFDPSSKQDVFCITPTDYLHDFHHLDTFSLAGGPLTFNTNPDHMIEMDSGYEHPLFDPLSNHGDNFSSMGQDFNFGYE  
FKPFEQNGNASGSTLFMKNFESSTDMKSINFNVVRDESSCVTSTIENNGTNNVYNDKEIGGKKNKKLIKSNDIKSSSSSS  
MRKSGRGRTRKKSASAKDQWTIEEDRILINLVEKFGDRKWEIAKMLKGRIGKQCRERWNNHLRPDIKV

>CcMYB50 |Locus\_ID=BC332\_17980 |Protein\_ID=PHU11050.1 |Protein\_len=342 |  
chr07:6396306-6398866 |strand= -  
MGRAPCCDKANVKKGPWSPEEDAKLKAYIEENG TGNNWIALPQKIGLKRCGKSCRLRWLN YLRPNIKHGGFTEEDNIIC  
SLYISIGSRWSIIAAQLPGR TDNDIKNYWNTLKKKLLGKRKQSQMNRLLLANGGQDLKELNGLEENPLLQNLNSALER  
LQLHMQLTLTNPLSFYNNPSLWPKLTPLQQKMIQTLQVNGLNEDQPPLYAPINPSENHAQELGQKVG MNEFASTNFKVN  
DQVEKSSPIDVLD TNVGQENTRDQIQIQGVQGFQTLEIDDLILSNKGSIGMMNMFEDLAWWSNEFD TNRASASNSWGSS  
SNILQNTHDEMYQDYALGYNLQ

>CcMYB51 |Locus\_ID=BC332\_22966 |Protein\_ID=PHU06477.1 |Protein\_len=274 |  
chr09:5574868-5577256 |strand= +  
MGRAPCCDKANVKKGPWSPEEDAKLKEYIDKFGTGGNWIALPQKAGLKRCGKSCRLRWLN YLRPNIKHGEFSDEEDRVIC  
SLYANIGSRWSIIAAQLPGR TDNDIKNYWNTLKKKLMGFVSSSHKIKPLNHHHYQH QIPTNYNNYSPQISLFTSSL  
LISSNYNTNTNTTTFPCYDINAPISNFLSNGASTSCTSGITTSTFQENNFVGPTATSSDES YGVSNLDFRTYMYNNGVIG  
EEGEDQGN SKFLISGNNDGGGCYVDEQQNPLDYS

>CcMYB52 |Locus\_ID=BC332\_17052 |Protein\_ID=PHU15847.1 |Protein\_len=333 |  
chr06:230366114-230369066 |strand= -  
MGRAPCCDKNNVKG PWSPEEDAKLKEFIDKYGTGGNWIALPQKAGLKRCGKSCRLRWLN YLRPNIKHGFDSDEEDRIIC  
SLYANIGSRWSIIAAQLPGR TDNDIKNYWNTLKKKLMGF IHTSSNQRIKSPNLFPP TTFPPQIQSQAISNIFKDEYLE  
PISSLQPNFMYHNNNMNFQLGTNNQYSYFLES LMNPMQASCSSSDGSCSQIPRSNFEETQKFTLDNYGNNGGTWADHDQK  
PDGYFGNNHQNHSSQFYDTSNIEEVKELISSSSSNGNGCNNNSNVLFFSDENKANIGAVPALTRGRGFDPEYGENSVGS  
AATLMGPVKRNP

>CcMYB53 |Locus\_ID=BC332\_05620 |Protein\_ID=PHU27288.1 |Protein\_len=330 |  
chr02:160525726-160527115 |strand= +  
MGRAPCCDKANVKG PWSPEEDSKLKAYIEQHGTGGNWITLPQKVGLKRCGKSCRLRWLN YLRPNIKHGEFTDEEDTIIC  
TLYMSIGSRWSIIAAQLPGR TDNDIKNYWNTLKKKLLCNKQRKDRPRTGYNHNKVDMMEQEDFFATHQTNNAYSW  
SPQQILFSTLIAPQNH DVAECSANSHNFQYSSTDQAYFSQDQLCQISSTNHLASMPVNGATCNSSMMVSSGAYYPSNGF  
CNGGLQEYNNYISVGLDHDVLNSTSTAHSQQVDKSVLEMVNSSTISTTSQDQSTSWEELSPLVNYPPSVFETVSPYYVFE  
EPRYLGLLKQ

>CcMYB54 |Locus\_ID=BC332\_24646 |Protein\_ID=PHU08157.1 |Protein\_len=268 |  
chr09:255698513-255701462 |strand= -  
MGRAPCCDKTKVKRG PWSPEEDNILKNFLEKNGTGGNWIALPQKAGLRRCGKSCRLRWLN YLRPDIKHGGFTEEDNIIL  
NLNYQIGSRWSVIAANLQGR TDNDVKNYWNTLKKKLLASQNTNIISTNNINSSDFNHINYSRNY YGTLDYSNTFTSHM  
DPNLTNYSNNCDQCP LPSLVEIQENDATIQSSESCILQKCATLKESDTHPSTFLQNPNNIGYNY YDDILENGFDFQEN  
AIGGANPNSSYYNNILEIDDQLFKGFEN

>CcMYB55 |Locus\_ID=BC332\_07302 |Protein\_ID=PHU22195.1 |Protein\_len=100 |  
chr03:51100152-51101088 |strand= +  
MGRTPCCDKTKVKRG QWSPEEDEILKNYMLKHGTAGSWITLPHKAGLNRC SKSCRLRWLN YLRPDIKLGKFTQEEDNIIH  
SLYSQLGSRLNLALQPLFIS

>CcMYB56 |Locus\_ID=BC332\_24914 |Protein\_ID=PHU04092.1 |Protein\_len=340 |  
chr10:3706345-3710034 |strand= +  
MGRIPCCEKDNVKG RQWTPPEEDHKLSSYIAQHGTRNWRLIPKNAGLQRCGKSCRLRW TNYLRPDLKHGQFSEAEETIVT  
LHSV LGNRWSVIAAQLPGR TDNDVKNHWNTLKKKRLSGMGIDPVTHKPF SHLISEIATTLSPQVPHLAEALGCFKDEM  
LHLLTKKRIGFQFHQQFPNNAPSTSHVKNEENDTVEKIKYGLSRAIKGSDKNWETNGGATSSSFHDNGGYSNYNFANLLN  
DEDGSPWNQSLCSGSTCTAGGELQQQQQQQRNKKTSNGNCEDSGKEVVTTRNGSTTTMFNSDCVLWDISSDDL MNPMVLR  
GSSQGERKLTETPESFKKSL

>CcMYB57 |Locus\_ID=BC332\_10902 |Protein\_ID=PHU19751.1 |Protein\_len=332 |  
chr04:104210982-104213348 |strand= -  
MGRPPCCDKANVKG PWTAEEDAKILAYVASHGIGNWTLVPQKAGLNRCGKSCRLRW TNYLRPDLKHDNFTSLEE ECILE  
LHKTIGSRWSLIAKRLPGR TDNDVKNYWNTLKKKLVNMGIDPVTHKPF AQVFAEYGKISGLPIQAKNHIHL PNNTTEK  
NHVCMESKQFPFSNGTPHDKFVHKIMNDQLQENYTKNYTWSKETLQTHSSLLISTSTSCNPTVHSYSPSFSSVQS QVHT  
MPASTSTCNWNEFIFGDPFTSSGAEQKETFLSNLLQKENPTCGEVTEVEEKQLVEEATCSSAMDSFVDTILANEKQMLM  
DFPPLLDVYLDY

>CcMYB59 |Locus\_ID=BC332\_07716 |Protein\_ID=PHU22609.1 |Protein\_len=250 |  
chr03:147200400-147201445 |strand= -  
MEVIIIKGAWSPDEDQKLKSYIMRYGIWNWNLMPKFAGLSRTGKSCRLRWMNYLRPEVKRGPFTIEETETVIKMYQELG

NRWAAIARRLPGRTDNEVKNFFHHLKHLGLKIDQNASVKLCKAVRRKRVLKTKKSDKKNLAQEKPVLYLDISGTSSN  
KSSFTISPSGSSSSSSSIITIDQNQMTDIHVDQPNSSIIDDMETTVLILESNPAISTHHDQSLDLSIDSLYQFDTSSFWLH  
LLNDAHRLIF

>CcMYB6 |Locus\_ID=BC332\_16696 |Protein\_ID=PHU15491.1 |Protein\_len=427 |  
chr06:222783269-222786007 |strand= -  
MELDQSNQNLSTHQPFFMPNNILKPEIDDDFCIDSKDYLLKDFEHLDLNFSNTTFNNFSQNFMIDDDTNGTTYHDPFD  
PFSNIEDNFSSLGDFNFSSHELTPFDQENGESGGSKVMKNFHDDEFMKPNLNFVNPDDQSSCVTGDNNLSSSIKKKL  
GRGRSKSSKSSKGQWTIEEDRLLIHLVEKFGIRKWSQIAQMLKGRIGKQCRERWHNHLRPDIKKDFWTEEDRILIEAH  
GEVGNKWAEIAKKLPGRTENSINKHWNATKRRQFSRRKCRTKWPRPSSLLQNYIKSLNLEKGSTKKDTNPNGRMEYTG  
SV  
AENRNENLANRPKRHANIAKVKVSPLKLEAIEFCQDNNAGDFDLSEVPEFALGDNFFDENKSMDAFMEEINPNVGT  
SIMP  
C  
NYEMPTLMMQGEVNKEIDLIEMISRVN

>CcMYB60-1 |Locus\_ID=BC332\_03169 |Protein\_ID=PHU24837.1 |Protein\_len=200 |  
chr02:214943-215803 |strand= +  
MFSKSPELWSHVAVGLSRTGKSCRLRWMNYLHPDVKRGPFTEEVETVIKTYQELGSRWSAIATKLPGRDTEVK  
NFFHT  
HLKKHLGLKNYDAQLKTRKGHKQTQENEKENSTQGRVLLETINSSSSSLSPDVCSPCSSITCKENQMMDQFTN  
FSLVVDQ  
QVSHVENTNIQSCFIPGGSTFSTFDQDMNSFWFDVLGNF

>CcMYB60-2 |Locus\_ID=BC332\_07717 |Protein\_ID=PHU22610.1 |Protein\_len=197 |  
chr03:147870740-147871891 |strand= +  
MLRVPQQQQKGLSRTGKSCRLRWMNYLHPDVKRGPFTEEVETVIKTYQELGSRWSAIATKLPGRDTEVK  
NFFHT  
HLKHLGLKNYDAQLKTRKGHKQTQENEKENSTQGRVLLETINSSSSSLSPDVCSPCSSITCKENQMTDQFTN  
FSLVVDQ  
QVSHVENTNIQSCFIPGGSTFSTFDQDMNSFWFDVLGNF

>CcMYB61 |Locus\_ID=BC332\_19187 |Protein\_ID=PHU12257.1 |Protein\_len=229 |  
chr07:200204999-200206373 |strand= +  
MVRTPIIDKNGIKRGAWEDEDNKLRAYVERFGHPNWRQLPKYAGLMRCGKSCRLRWMNHLRPLKKGNYR  
LEEEQL  
IIK  
LHKELGNRWSVIAANLPGRSDNDVKNHWHHLKRVRLTNCINNSSSMSMEQFTESTQSGSSQLDERSAS  
MNVV  
VDT  
SPTL  
LPISFPEVSSSDLYSITDWIEEESMEQLPILSSMELLAADTFSWTNYPIDNFQTESFDHFWTQPFDTFF

>CcMYB63 |Locus\_ID=BC332\_19183 |Protein\_ID=PHU12253.1 |Protein\_len=247 |  
chr07:199344861-199346752 |strand= -  
MVRTPCDENGRRKGTWTPEDRKLAAAYITEYGSWNWRQLPKYAGLERCGKSCRLRWLNLYLRPNVKR  
GNYTE  
EEDE  
IILN  
LHAQLGNKWSAIAAHLPGSDNEIKNHWHHTALKKRANNSGESSKKCNSKNIRRTSVANKNASPSTSHEN  
IVLE  
SSQWS  
PKESSEDDFFSYSNTDYQECHKVFQEQALDEITSGSFWTEPFLVESFNTTGTDFLAPPIDYCGLVCP  
PSPFI  
GHEFL  
SSSF  
DFDHFNY

>CcMYB64 |Locus\_ID=BC332\_19182 |Protein\_ID=PHU12252.1 |Protein\_len=137 |  
chr07:199271585-199272584 |strand= -  
MVRTPCHDEKGRKGTWTPEDRKLAAAYITKYGSWNWRQLPKYAGLARCCKSCRLRWMNLYLRPNVKR  
GNYT  
KEDE  
IILN  
LHAQLGNKWSAIAVHLPGRSDNEIKNHWHHTALKKRANYVSTSSDVSSKKSNNKKNSG

>CcMYB65 |Locus\_ID=BC332\_19186 |Protein\_ID=PHU12256.1 |Protein\_len=248 |  
chr07:199992922-199998903 |strand= -  
LARCCKSCRLRWMNHLSPNVKRGNYTKEEDEIILNLHAQLGNKWSAIAAHLPGSDNEIKNHWHHTL  
KKHAT  
NATN  
SSS  
DKSSKKCSNNKNKNTKSNASKDASPNNNMHENVILESEWSPKESLSDQELISSDSTSVQNDVQNDV  
FQEN  
LVEIT  
SGSF  
W  
TEPFVVEFNSPRIDFLGPPSIDYGLVCPSPFIGEGFVSSFDLDDYNCGRIVEEAEDGKKQHTKKKEK  
TKKM  
NRKKK  
KKK  
KQTKKMWS

>CcMYB67-1 |Locus\_ID=BC332\_06786 |Protein\_ID=PHU21679.1 |Protein\_len=278 |  
chr03:18458084-18460142 |strand= +  
MVRAPCCEKMGKKGPWTPEDQILVSYIQANGHGNWRALPKLAGLLRCGKSCRLRWNTNYLRPDIKR  
GNFT  
TREE  
DSII  
Q  
LHEMLGNRWSAIAARLPGRTDNEIKNVWHTLKKRLKNYQAPENSKRHCKKNIDSKAPSTSQITLK  
SSHNF  
SNIKE  
GING  
PDPNSPQLSSSEASTVTADSESVMTMGVTNGGDQMSYENFIPEIDESFWTDDLSTADNSSFDMAIS  
GGEEL  
QGQFP  
FY  
DMKQESVELDVGAKLEDDMDFWYNVFIKSGDLLELPEF

>CcMYB67-2 |Locus\_ID=BC332\_10106 |Protein\_ID=PHU18955.1 |Protein\_len=110 |  
chr04:4180528-4182538 |strand= +  
MVRAPCCDKTGLRKGPWAFEDQILISYIQKYGHGNWRALPKQAVVTSDSSSSIIAFGVTIDNTIAV  
KLEES  
DSSE  
YLTE  
IDESFRDDEDDMDFLNFFFIKAEDFSELPEL

>CcMYB68 |Locus\_ID=BC332\_15553 |Protein\_ID=PHU14348.1 |Protein\_len=280 |  
chr06:140486325-140491524 |strand= -  
MGRAPCCEKMLKKGPWSPQEDNILISYIQNNGHSNWRALPKLAGLLRCGKSCRLRWTNYLRPDIKRGNFSKEEEDTIIQ  
LHENLGNRWSAIAARLSGRTDNEIKNVWHTHLKKLKNYQPPQNSKRHFKTNHDSKKGPTTESSNNSDFSTSANNTNTHK  
KHKMIAPNSPVLSSSEMSTVTLVDDRQRVIIKEEKIESPLEYFPKIDESFWTEELSAEKNNDNDYVMAAGLDQDIQAQI  
QLSSVKEENLDNTSTKMEEDMDFWYNVFIKTGDFLELPEF

>CcMYB69 |Locus\_ID=BC332\_17589 |Protein\_ID=PHU16384.1 |Protein\_len=283 |  
chr06:247867460-247869081 |strand= -  
MGRTPCCEKLGLKRGWSKEEDLLINYINKNGHPNWRALPKLAGLLRCGKSCRLRWTNYLKPDIKRGNFTNEEEDTIIK  
LHQVLGNRWSTIAARLPGRTDNEIKNIWHTRLKKKISKSHAQKIPELQEETSMETSKSDEQNLDTLHLEPENSNDIHLES  
DNSKDNCIEISSPKTNNEIQQSSSSVHSSSSISSSEDACSNTTATSPEPRDQFMLDNLVEIDDDFSDVLWTTVDDSNY  
NDNNFDLPLMEDNYQINPSLNDNWFWDLLFTRSNELMLELSEF

>CcMYB7 |Locus\_ID=BC332\_17369 |Protein\_ID=PHU16164.1 |Protein\_len=341 |  
chr06:244058071-244059809 |strand= +  
KLLRLVKQFGVRKWAQIAEKMGARAGKQCRERWHNHLRPDIKKDWTSEEEELLVELHKLGNKWAIEAKRIPGRTENAI  
KNHWNATKRRQNSRRNKNKKTQADGTQCENKSHRSTVLQDYIRSKYFMNDDNSPLTATLYYGGGTASGGGYSPSTTTF  
IGSTSNATNATPTYSDDDSPYLITHQTYDEEMNFMQSLFGNSNNGTKVMGMTMETNVVTQDLLDKSSSSSSFLNSSGE  
IPLAECNVESYTTTKRVIADNNARNYIPDYSQYYPQDLYLSRLLDGSLVPNYSDFECGSMNNQAGCSSSGGNIKEVDLM  
EMMNSTNSQFSQPGTFNKTF

>CcMYB70 |Locus\_ID=BC332\_14283 |Protein\_ID=PHU18588.1 |Protein\_len=147 |  
chr05:232898517-232898960 |strand= -  
MFFFFRWSAIASRLPGRTDNEIKNFWHTHLKKRLEQHNIDLASTTTTKQNHMETTNVTQNIIDHHIISPNNYQDSQNMVTY  
HPTYCHDHQEDFQENSSSHDHTQSNKEEIMQYSTNYGHEDMTSFNNDMVFWYNVFMSSGNNPSEIS

>CcMYB71 |Locus\_ID=BC332\_24933 |Protein\_ID=PHU04111.1 |Protein\_len=225 |  
chr10:3918996-3919985 |strand= +  
MGKGRRSCCDKSEVKKGPWTPEEDLKLISFIQKHGHGNWRALPKQAGLVRGKSCRLRWINYLRPDVKRGNFTSQEEDTI  
INLHRSFGNRWSKIASHLPGRTDNEIKNVWNTHLKKRLLLMKKEEHNSPSTPTCSSTTLGFCSTSSKANDQVIDFWEY  
MLDTSNPTSINNLDHFDSSYSKQDTTSTNTEHHQPQMADEYECQKWLTYLEIELGLTTNEAQHQIK

>CcMYB72 |Locus\_ID=BC332\_20160 |Protein\_ID=PHU13230.1 |Protein\_len=295 |  
chr07:233361071-233362589 |strand= -  
MMGKGRAPCCDKSKVKKGPWSSEEDIRLIAFIQKHGHQNWRSPLKQAGLLRCGKSCRLRWINYLRPDVKRGNFTPQEEET  
IIKLHQSFNGKWSRIASHLPGRTDNEIKNVWNTHLKKRLMKRLHGDKAKLDGTCANSQSSSSSTSVVSHTDDTSNEGKFK  
NVDANMIENATKEEEATKSCSPTSSYASNLSQVHEASSPNNVMDWIFQFSEEPFPSTTARKVHDDDDGEIIEIPLECD  
VDFWDMLDIMGSPPPPPPPNSESCLDHHSEASCQGLSEFERQKWFTYFERELGV

>CcMYB73 |Locus\_ID=BC332\_21478 |Protein\_ID=PHU09618.1 |Protein\_len=310 |  
chr08:169412994-169415439 |strand= +  
MGRTPCCDKNGLTRGPWTPEEDEKLVEFINKNHGHSWRSPLPKLAGLLRCGKSCRLRWTNYLRPDIKRGPFSPPEQKLVIQ  
LHGILGNRWAAIASQLPGRTDNEIKNLWNTHLKRLLSMGIDPQTHEHSDPNGLVRRPATSSLARHLAQWESARLEAEA  
RLSRESQFLVPSSVGRSETDYFLRIWNSEIGESFRKFKKGEKSACHSPASQASSCTKYGSAGITTEVEIGVAGSPVTGS  
NQNECMEWKIGQPYTEDFLQGADTCSSNAMDEDSSESALQLLLDFPSNNDMSFLGHSDSYSLYPFLSESY

>CcMYB74 |Locus\_ID=BC332\_00519 |Protein\_ID=PHU28426.1 |Protein\_len=277 |  
chr01:9886795-9888950 |strand= -  
MGRQPCCDKLGVKKGPWTTEEDKKLINFILTNQCCWRAVPKLAGLRRCGKSCRLRWTNYLRPDLKRGLLSDAEEMKVID  
LHARLGNRWSKIAARLPGRTDNEIKNHWNTHIKKLLKMGIDPVTHEPLIKEENPTDQPIQESDQNKNNHDHQVVVVVTAG  
ATSSELDNSSTSSSSASSSENSCNESKLVDLTFKENDPLLSCLEADDAPPLIDSSWELPVKSFDNNNNMTSSWDDSFN  
WLFDCQDFGIHDFGDFDNCFNDELEVNTIYDMENKK

>CcMYB75 |Locus\_ID=BC332\_12501 |Protein\_ID=PHU16806.1 |Protein\_len=319 |  
chr05:4827474-4829916 |strand= -  
MGRQPCCDKNGVKKGPWSSEEDKKLINFILNNGQCCWRSPLPKLAGLLRCGKSCRLRWTNYLRPDVKRGLLSEYEEMKVID  
LHAQLGNRWSKIASHLPGRTDNEIKNHWNTHIKKLLKMGIDPITHKPITSDQPTYDQPIIQEKQTLIAPPSQTDLNRQ  
GNENTGTCPKNIKTTTTATTTTAVAMPSETNLDQRQENKNVGTCPRIKTTTTTTTTVVTQSETNLDQKVPLIPPTEILI  
PYESTTSSTSSSFSSQSSMILEDLKLFPNFDNWQSDFNMEINWTNDDFSSTLDYLLNDDDISDMNNTTISQDWSQVLEV

>CcMYB76 |Locus\_ID=BC332\_29469 |Protein\_ID=PHT99681.1 |Protein\_len=303 |

chr12:6595886-6597904 |strand= +  
MGRQPCCDKVGLKKGWPTTEEDKKLIHFILNNGQCCWRAVPKLAGLLRCGKSCRLRWTNYLRPDLKRGLLSEYEEKMVID  
LHAQLGNRWSKIASHLPGRTDNEIKNHWNTTHIKKKLKKMGIDPVTHKSLSTITNDQTNILEQENQPIQQEKVEDQSTMIE  
IKAEDDNNNSNNNNNSNDNNTMETSCANNFNSTIVEVNNNGFGIDEVPLIEPHEMLVQELSSTPSTSSSSSSSFSSSSSSN  
ILEDLKLFLPSFDEWPLMENNMMGFWEINNDFTSTLDFLLEDDHSDMMNNVTFDESWKFEQLL

>CcMYB77 |Locus\_ID=BC332\_06135 |Protein\_ID=PHU27803.1 |Protein\_len=255 |  
chr02:168560272-168561366 |strand= -  
MGRQPCCDRVGLKRGWPTIEEDHKLHVFILSNGIQCWRTVPKLAGLQRCGKSCRLRWINYLRPDLKRGALSEAEEDQIIQ  
LHARLGNRWSKIASYFPGRTDNEIKNHWNTTRIKRLQLMGIDPLTHQPIDMEKYQHEPDQTEKCDKRNEPENFIENTNDV  
SLPNNPHHNMLSDFSFVNDLWNKSGNTMSTCYSPLSISLEAESINLSTTTSAATESSSNVAALTEEQDSLQQWMDSIFSCA  
VNQLEEDLIFLRKYN

>CcMYB78 |Locus\_ID=BC332\_28218 |Protein\_ID=PHU02967.1 |Protein\_len=224 |  
chr11:103211038-103212268 |strand= +  
MGRQPCCDKIGLKRGPWKIEEDHKLMNFILNNGIQCWRLVPKLAGLMRCGKSCRLRWINYLRPDLKRGALTEAEEDIIK  
LHSHLGNRWSKIAAHFPGRTDNEIKNHWNTTRIKKKLKLGLIDPLTHKPIEQNDQKQVSVEIDENVKELAEKTLDYPRE  
QQNIQNSTSSSSLNESLDMGSSEIFQNSHTLDMYNPVGVEDPFQNWIGSPIHWDLFDNLEDNFL

>CcMYB79 |Locus\_ID=BC332\_10962 |Protein\_ID=PHU19811.1 |Protein\_len=347 |  
chr04:124481192-124482690 |strand= -  
MGRSPCCDENGKKGWPTPEEDQKLVDYIDKHGHSWRALPKLSGLNRCGKSCRLRWTNYLRPDIKRGKFSEEEEQTILH  
LHSILGNKWSAIATHLPGRTDNEIKNFWNTHLKKKLIQMGYDPMTHRPRTDLFASLPNIIALANLLQHHPLEDQAIRLQA  
EAAQIAKIYQLQFLQSSNNNYPPIPTTSSNTQYYNNGDIGAFNLTNFVKENSTTSLNLSNLENQTLFSNETGSQLL  
HNPNTQQVPFNFQTHLNNNNNNMSDIDGNNFNFDFLEDNSPSSPLNNTIIPSPSSSHLPHLTEISISNNNQDSSCNS  
SNNVADQGTSSSYWPELFFEEHFMHDI

>CcMYB8 |Locus\_ID=BC332\_08524 |Protein\_ID=PHU23417.1 |Protein\_len=248 |  
chr03:237317481-237320769 |strand= -  
MCSRGHWRPHDEKLKELVAKYGPHNWNIAENLQGRSGKSCRLRWYNQLDPRINRSPFTEEEERLLSSHRIHGHRWAM  
IARLFPGRTDNAVKNHWHVIMSRRCRERSKIYSNRASAAAAAQKSTDQQDNINNIQDMMIRKRSSNNFIDHQQLLERYSN  
CYQFSSYDHNSFYPTFEHFNHLPRHFKMDNQEKEEVECYDFLQVNNTAGSNKSEVIDQEVEQKRDISPQSKKAPVRFID  
FLSVGDSS

>CcMYB80 |Locus\_ID=BC332\_13875 |Protein\_ID=PHU18180.1 |Protein\_len=351 |  
chr05:217058715-217061169 |strand= +  
MGRSPCCDESLKKGWPTPEEDQKLTYINKNGHGSWRALPKHAGLNRCGKSCRLRWSNYLRPDIKRGKFSQEEEQTILN  
LHAVLGNKWSAIATHLPGRTDNEIKNFWNTHLKKKLIQMGYDPMTHRPRTDIFNSLQHLIALANLKEIEHNHSWEEQVM  
RLHYLQNLQPHNNNISTLSAIQNVEANYNLLNSLKDSQFLDSNSHLGNHIVHQIPSSLDQPIQNSIPFSHLTELHTPC  
SFQTSLNKDKVPPQDIEFTVMSHEETSPASSWLPLSPSLPPPPPPVSNNQRRKENSSEVVISSCLPEDMKVLDNFFQQD  
SEQLSNEGAPPSIWSDLPLEDSFFQGLDKF

>CcMYB81 |Locus\_ID=BC332\_00728 |Protein\_ID=PHU28635.1 |Protein\_len=299 |  
chr01:16594255-16596304 |strand= -  
MGRYPCCCKLENDLKKGPWTSEDEKLVEYIQENGHNWQLVPKRAGLNRCGKSCRLRWTNYLRPDIKRGAFSNEEEETII  
NLHSLLGKWSRIAARLPGRTDNEIKNLWNTHLKKKLLKSGIDPVTHQPIDPNLLLSLNLMPFESALRLQAEFTEIA  
KIHILQNIQVLNTPALPLISLQENYPMQFYNNILAPFDQILANEPSISKNLSDNMVVNSSILENNMINNGYSKVCE  
VDNSEYSSLPSTITPENSVPFDQKIDIINPSYDDFEALEKSLDDDFWKDISSTMQFV

>CcMYB82 |Locus\_ID=BC332\_00729 |Protein\_ID=PHU28636.1 |Protein\_len=215 |  
chr01:16770190-16771372 |strand= -  
MGRYPCKFVDEDLKKGPWTPDEDKLMDYITNNGHTNWQLIPKKAGLNRCGKSCRLRWTNYLRPDIKRGAFSFEETIIII  
SLHSLGNKWSRIASHLPGRTDNEIKNFYNTHLRKKLLRLGIDPRTHKPIDLNFLINLSHQFPSKHNLFINNPLAYALK  
LQAQVTEIAKLQQLLDLYAPINTNIPLPSNFQENNFATSSSHVITTNVSTNTH

>CcMYB83 |Locus\_ID=BC332\_19190 |Protein\_ID=PHU12260.1 |Protein\_len=337 |  
chr07:200612980-200614206 |strand= +  
MGRSPCCDKNGLKKGWPTPEEDNKLIQYIQLHGPGNWRTL PKNAGLQRCGKSCRLRWTNYLRPDIKRGKFSFDEETIIQ  
LHSV LGNKWSAIAARLPGRTDNEIKNYWNTHIRKRLLRNGIDPVTHSPRLDLLDLSSLLNSTQFNLSSLLGLQALINPEV  
FRLATTL LASHNESSPELLLQKLQENNQMFNSQLQNGEGSELLLQKLQQNQLLNAQVQNQPQFFQYQYQNIQEI PNFTTT  
QNVACSSSLSQPMQLLGHVDES YLMNGQMLPPQNYGYCNSDASDNSTFQSLNNSSNQNFSLDNSVLSTPTEDEKESYCS  
NLMKFEIPESLNFDDFM

>CcMYB84 |Locus\_ID=BC332\_25152 |Protein\_ID=PHU04330.1 |Protein\_len=329 |  
chr10:12669439-12671617 |strand= +  
MGRTPCCDKNGLKKGWPTPEEDQKLIQYIQVHGPNGWRNLPKNAGLQRCGKSCRLRWTNYLRPDIRRGFSFEEEEETIIQ  
LHSLGNKWSAIAERLPGRTDNEIKNYWNTHIRKRLRMGIDPVTHSPRLDLDLSSILNPSFYNNSSSLHQMNLRLG  
FKLANSILLSQTHENQELSLQNSQGPPELLQKLQONQLLNQSSIFQHNDQLHNQISKIPNYTPQNVSSSSSSQSIQGN  
MGSYLMNGQAFHENVISLQNYSSASEVSENSTIQLNNNNNNNNQNSQNFNFDTPLSGTEEEKESYCSNFNSFMKFEIP  
ESLDFDILL

>CcMYB85 |Locus\_ID=BC332\_04760 |Protein\_ID=PHU26428.1 |Protein\_len=381 |  
chr02:144150965-144152416 |strand= +  
MGRAPCCDKNGLKKGWPTPEEDQKLIDYIQKHGYNWRTL PKNAGLQRCGKSCRLRWTNYLRPDIKRGFSFEEEEETIIQ  
LHSLGNKWSAIAARLPGRTDNEIKNYWNTHIRKRLRMGIDPVTHSPRLDLDLSSILNPSFYNNSSSLHQMNLRLG  
HVQPLVNPEVLRATSLSSQRQNTNNSFMIPNNHQENQICQNQLPQMVSQIQAPIQDYPTCTTLSTTPCVPFSSHEA  
QLMQPPTTNMEGFSSKLENFSNSTSCQVNDQWQLSNGMPTSNLTDYFPLQNYGYDPLPSDGSTLIQSNDNNNNNFSF  
QSTVLSNLSTPSSSPTPLDSNSTYFNNSSSTTTEDERDSYCSNMLNFDNIPNIWDTTNEFM

>CcMYB86 |Locus\_ID=BC332\_25248 |Protein\_ID=PHU04426.1 |Protein\_len=321 |  
chr10:22814177-22815897 |strand= +  
MGRTPCCDKNGLKKGWPTTEEDQRLIDYIQKHGSGNWRTPKNAGLQRCGKSCRLRWTNYLRPDIKRGKFSFEEEEETIIH  
LHSLGNKWSAIAARLPGRTDNEIKNYWNTRIRKRLRMGIDPVTHSPRLDLDLNSIFNPSIYNQCVINNNLSRLG  
QSLVNPELLKLANSLLSNHQNFLLGSNFQENQPFNSHVQNQLTSLCQANQIQNPQNTSTCSDLNQSVPFYSDTQV  
MQQPNEQLSSNVSTFSSQNSQNEWKNFTFDSALPNLSTPSSSPTSLNSNSTTSEEERESYCSMLNFDIPNILDVNEL  
L

>CcMYB87 |Locus\_ID=BC332\_06008 |Protein\_ID=PHU27676.1 |Protein\_len=415 |  
chr02:166597434-166599474 |strand= -  
MGRSPCCDKVGLKKGWPTPEEDQKLLAYIEEHGHSWRALPAKAGLQRCGKSCRLRWTNYLRPDIKRGKFTLQEEQTIIQ  
LHALLGNRWSAIAATHLPKRTDNEIKNYWNTHLKKRLVKMGIDPVTHKPKNDALLSHDQSKNAANLSHMAQWESARLEAE  
ARLARQSKLRSSSFHSSITSQEFTAPSPSSPLSKPVVGPTRCLDVLKAWNGVWTKPMNDVSVANASAGISVTGLARDLES  
PTSTLGYFENAQHISTSGIGGNSTILYEFVGNSSGSSEGGIMNEESEEDWKGFGNSSTGHLPEYNKDGINENSLSFTSG  
LQDLTLPMDTTWTAESLRNTDQISPANFVETFTDLLLSNSGDGDLSEGGTESDNGGEGSGSGNASENCEDNKNYWN  
FNLVNNPSPSDSAMF

>CcMYB89 |Locus\_ID=BC332\_01852 |Protein\_ID=PHU29759.1 |Protein\_len=335 |  
chr01:102126900-102129773 |strand= +  
MGRSPCCEKVGLKKGWTPQEDQKLTYYIEKHGCGSWRALPTKAGLKRCGKSCRLRWINYLRPDIKRGKFSLQEEQTIIQ  
LHALLGNRWSAIAATHLANRTDNEIKNYWNTHLKKRLTKMGIDPNTHKPRSNGFSANLSHMAQWENARLEAEARLVRESKK  
QEEIILINNINNNYNIHFGTNNLGTKNVLLPLQTKLPSLPCLDVLKAWEGGANWSNRPKIKKEKFFDNFPTSSTLSN  
NNLLLMPVSNNNNNNILGAGLVNTCLVGAGSFLGNNINEISSYSSYPCLNDIQGFTQLESVVGSCQDDYDNDNNYWN  
ILNSCTSLADGSPVF

>CcMYB9 |Locus\_ID=BC332\_26517 |Protein\_ID=PHU05695.1 |Protein\_len=344 |  
chr10:217396241-217398481 |strand= +  
MNFLVPCVEQSPWSFNHEENLRKLKDEIEEENLVDMMKNNNNNNNGGKICVRGHWPHEDSKLRELVAQYGPQNNLIE  
KLDGRSGKSCRLRWFNQLDPRINRMASFEEEEERLLTAHKMYGNKWSMIARLPGRTDNAVKNHWHVIMARKHREQNSVY  
RRRKSTSSNLQIIAPNNNNNDIIQIKSNMQSDLTISSNCCNNNNIIVDDHQSASTCTDLSTPSSSKPMFPFLMTR  
FTHHHHVEHQGLDSNKGMLSRDEQEVKMDQKFLYGKEPIESYHHHHNHQHYGCGNVSDTNSEISASESVANNMTNVKIY  
GHQNEEQDIKTIPFIDFLGVGAT

>CcMYB90 |Locus\_ID=BC332\_27735 |Protein\_ID=PHU02484.1 |Protein\_len=182 |  
chr11:25428714-25431671 |strand= +  
MGRSKCCDKEGLKKGWPTHDEDQKLSFIEKHGCGSWRSLPAKAGLQRCGKSCRLRWTNYLRPDIKRGKFSLQEERSIIH  
LHALLGNRWSAIAATYLPRTDNEIKNYWNSRLKKRLTKMGIDPMTHKPKITNNLNGVASSKYVANLSHMAEWESARLEAE  
ARLVQSKSKILFNNKCCQH

>CcMYB91 |Locus\_ID=BC332\_27736 |Protein\_ID=PHU02485.1 |Protein\_len=345 |  
chr11:25454017-25455690 |strand= -  
MGKSKCSDKEGLKKGWPTAEEDQKLSFIDKHGCGSWRALPAKAGLQRCGKSCRLRWINYLRPDIKRGKFSLQEERTIIH  
LHALLGNRWSAIAATYLPRTDNEIKNYWNSRLKKRLTKMGIDPMTHKPKVTNNLNGVASSKYVATLSHMAEWESARLEAE  
ARLVKSKDYEIFNNNNYNINRSTISQQLPYQLPCLDILKAWQMSSTKLPTINDISAILNNSRNNNLESSIPSTLHS  
SETLFVNNNVPTTTTTTNVRDDHQIPNLSTIESCFEDDQLQTDLPSPMFQEFSGLFPEYTTQNSTNIQVDNLMGSCSGDF

EDNKLINWNNFPNYLVNSPIGSPVF

>CcMYB92 |Locus\_ID=BC332\_03833 |Protein\_ID=PHU25501.1 |Protein\_len=330 |  
chr02:110224039-110226630 |strand= +  
MGRLPCCDKVGVKKGPWTPPEEDIMLVSYVQEHGPGNWRAVPTKTGLRRCSSKSCRLRWTNYLRPGIKRGNFTDQEEKTIQ  
LQALFGNKWAAIASYLPERTDNDIKNYWNTHLKKLKKFQLDQCSGSDHLYFVENGLTHLSSSNSRGQWERTLQTDINM  
AKKALHNALSLENSTSPLINIKQENPQVSSSTYASSTENISRLLQGWMRSSTSENKTSNNIATNDSSSCDGTNPNAESK  
GGMGLMEAFESLFGLESFESSSSDEFSQTTSPQAEATKVEIKKEENENVEAPAVPLSIILENWLLDENTLNIQAKDDLTT  
FSFDETAPLF

>CcMYB93 |Locus\_ID=BC332\_06027 |Protein\_ID=PHU27695.1 |Protein\_len=304 |  
chr02:166911270-166912677 |strand= -  
MGRPPCCDKLVKKGPWTPPEEDIMLVSVFQEHGPGNWRTVPHTTGLRRCSSKSCRLRWTNYLRPGIKRGSFTDQEEKMIIQ  
LQALLGNKWAAIASYLPERTDNDIKNYWNTHLKKLKKLEANDLYSSDGHCLSSIKSASRGQWERTLQADINTAKQALQN  
ALSLDKSSPISEYTIKPINIDCPSYIKQEAQMSTSTYASSAENIAKLLKQWTRSDSTNNSEQSKASSSTQFSCNTTNT  
NAMTEYSSSFESFEPNSDQFSQATTPEAAGKFYGESKRELDDEVPLSVMLESWLFDENDLLI

>CcMYB94 |Locus\_ID=BC332\_26534 |Protein\_ID=PHU05712.1 |Protein\_len=352 |  
chr10:218195386-218197130 |strand= +  
MNELIKNHLFFFSSNHLPLFKHLSICASSFSFQLSIHTSKTLHTKTTTTTTTTPPPPXXXXKQTMGRPPCCDKIGIKKG  
PWTPEEDIILVSYIQEHGPGNWSVPTNTGLMRCSKSCRLRWTNYLRPGIKRGNFTPHEEGMIIHLQALLGNKWAAIASY  
LPQRTDNDIKNYWNTHLKKLKKLQTELDShNLAPLLPNNNNNNINYNHNFQSWQLSVNNNDKQGISSSSSSSLYASS  
TENISRLLLEGWMRSSPNNPSRRNNIDHDHDEMLHVAQKNDQDQEIWKSTCEENENSWIIPKEKSSNCESNGVVVDHGK  
TSPPPFTYLEKWLLLENGGQVEELMELPMIFT

>CcMYB95 |Locus\_ID=BC332\_09091 |Protein\_ID=PHU23984.1 |Protein\_len=334 |  
chr03:252973028-252974354 |strand= -  
MGRPPCCDKIGVKKGPWTPPEEDIILVSYIQHGPNGWRAVPGNTGLLRCSKSCRLRWTNYLRPGIKRGNFTEHEEKMIH  
LQALLGNRWAAIASYLPQRTDNDIKNYWNTHLRKKLKKIQGNDENSTGQEGATSSSSQSNFIKQWERRLQTDIHMAKKA  
LVEALSLDKSDSLANPISPVLAAQTVPGSSSYASSAENISRLLQNMKNKSPKSSQLSRNSSETTQSSLNPSIGSGSGSS  
SSPSEGTTISGATPEGFDTLFSEGNFTPENSGIFQVESKLNFPNSNSENGILFQESQAPLTLEKWLFDADAINAPTQED  
EFIGMDLGESAGFF

>CcMYB96 |Locus\_ID=BC332\_33109 |Protein\_ID=PHT97965.1 |Protein\_len=370 |  
scaffolds:252070-253948 |strand= -  
MGRPPCCEKTVKKGPWTPPEEDIILVSYIQEHGPGNWRNIPTNTGLLRCSKSCRLRWTNYLRPGIKRGNFTEHEEKMIH  
LQALLGNRWAAIASYLPQRTDNDIKNYWNTHLKKLKNKKVESHGNDADHDENNHQEGASTSSSSQSRISKQWERRLQ  
DIHTAKQALCEALSLDASPNTIPINPEQQQPAVQASMTYASSAENIAKLLQNMKNKSPNSTSSSSSKITQQMSLNNL  
SVGALSSSSPSEGTNNVAPPQGLDSLFSFNSSNNSDVSQSVSIDEGNLITPENNNAGIFQVESKPILPDFKPESGIHQ  
EESKQNLQVPLTLEKWLDDANAQAEQEDQLMGIGMGAMSETADLF

>CcMYB97 |Locus\_ID=BC332\_14191 |Protein\_ID=PHU18496.1 |Protein\_len=453 |  
chr05:230830190-230832364 |strand= -  
LLRCGKSCRLRWTNYLRPNLKRKFTAEEDETIVKLHSTLGNRWSLIAQDLPGRTDNEIKNYWNSNLRRLYSFRNFKE  
IKTTTNVPKIAVDGDSDESLRKQDTSTMSKEGSIESLLPEDNIVVDRGSTRKNRSLCVGSNEGATWSEGDSTESLLPKNC  
TVDIGSMRKPYPSSCPRGKDDVSWYRGGSTESLLENIEINFACEENSIGSLLMENCSCPGRRDTSWSEEGGSFKSLLE  
NIETNFSCPKGTCNATWSEGGSEFFSLENCADVLGSNRENKSDKGGSEIYLLTGNYTVDIGFNRETNSSSCPRGNAEAM  
WYEEGSSIESSSTESYIVDLFLTQSPTRKTEELAMQHEHAKSKIHEPNEEGEAKNIKDIIHDSKPKQLCQIGCSIGE  
QEQQIQGPHEQNEENEIVIQKHNDCLHNFNNWSNINFDYFLEDEYGIWNH

>CcMYB98 |Locus\_ID=BC332\_02702 |Protein\_ID=PHU30609.1 |Protein\_len=450 |  
chr01:210100644-210105740 |strand= +  
MVSLFIGTGLITLPPHCHFNIIIRRESYYWCYANMGRAPCCEKVLKRGWTAEDQILTNYILSNGEGSWRSLP  
KNAGLLRCGKSCRLRWINYLRSDLRGNITSQENIIKLHATLGNRWSLIAHMPGRTDNEIKNYWNSHLRQVESLRI  
PSDEKLPAVVDLAKKALMPIKQSRKTSRISNMKNKTSKNSNLAEPKEAKENSTSGPLSASAVSIPSTLNMEKEALSS  
TISSWLDGKNMPASDSAMDMSQEDVADVAAPNPRVGSRESHSSLSSEDCDMEWLEEIMPVVDVINDQMDPNFILSSLENG  
QGETPLNETGNNYCRTHRIDERNKTVSSQEAVSSTNEKSRLMEAAANDGRLEWDWQDDHELVPAMSWELETQENIGS  
SSIPSWPLWDTGTDLLQNFNMHEDPVEIDSMHIMSENDQNPSALAAWLLS

>CcMYB99 |Locus\_ID=BC332\_14511 |Protein\_ID=PHU13306.1 |Protein\_len=270 |  
chr06:271656-275644 |strand= -  
MGRTPCCEKVGLRKGRWTKEEDEILTNYILANGEGSWRSLPKNAGLLRCGKSCRLRWMNYLKTDLKRGNITSDEEAIK

LRATLGNRWSVIAEYLPGRTDNEIKNYWNSRLSRKVDSLRIPSDEKLPLAVVEMAKNKGIEQIVKRQRRKRKADSNFMT  
ETSVSTSSCYNNNNNDDVVLMDDKDAELDQDFIFNCLWDCEGEDLEIVENNNNEVLSYDNYDQLDCWNWEQLDEIWANE  
EATRQEIDNNDNVQNCMNQQVPIENVVIW

>CcMYB122 |Locus\_ID=BC332\_25527 |Protein\_ID=PHU04705.1 |Protein\_len=282 |  
chr10:86998929-87004403 |strand= +  
MGRSPCCEKAHTNKGAWTKEEDERLIDYIRAHGEGCWRSLSKPAGLLRCGKSCRLRWINYLRPDLKRGNFTEEEDELIK  
LHSLLGNKWSLIAGRLPGRTNNEIKNYWNTHIRQKLLSRGIDPTIHRISINEPTPKVTTITFAAADSTDDHHRDQKINIK  
AEFDETSNEDNNEVPKMSCLPDLNLELRISPPHHQLDHHHQRSNSLCFTCSLGIQNSKDCSCNNTNGIGCSNNIVSMNI  
VTGISLCCLNAAVLPPNPSRHETEVWMGAFAVSDSINRFQRC

>CcMYB123 |Locus\_ID=BC332\_13322 |Protein\_ID=PHU17627.1 |Protein\_len=270 |  
chr05:88778559-88782778 |strand= +  
MKKLVEYIKKHGHSWHSPLHLAGLARGKSCRLRWNYLRPDIKRGPFSEVEKFVIQLHGMLGNRWAAIASQLPGRTD  
NEIKNLWNTHLKKRLLSMGINPQTHEPSSAPNGLLVPTLTSAAARHMAQWESARLEAEAHLSRESQLLVPSVSESGTDY  
FLRIWNSEVGEAFRKFNKKKAGLVKVQPLKHLHQNTKWKNQPYKGDVFGQYDDTSSSSGLEDSSESALQLPFDFLSNN  
DMSFLRHSDTYSLYPGFLSESSLKCSSTEQ

>CcMYB124 |Locus\_ID=BC332\_14051 |Protein\_ID=PHU18356.1 |Protein\_len=237 |  
chr05:227335834-227337292 |strand= +  
MGRWGIIEEEWRKGPWTVEEDKLLIEYVNLHGEGRWNSVARLAGLKRNGKSCRLRWVNYLRPDLKRGQITPYEERIILEL  
HAIWGNRWSTIARSLPGRTDNEIKNYWRTHFKKKVKSSTDNFEKTKARLLKRQSQKQLLNSQIDMKRFMSQENKVP  
SHVPKQDMAILYQNSFHEQEQSGFFYSMNNGYAIVPEASSNEDIMWDIGLWNLDDFNVNLPVSAVESGFAIKEFKI
