# Supplementary material
Source: publisher figshare collection journal article supplement (https://frontiersin.figshare.com/ndownloader/files/31070026)

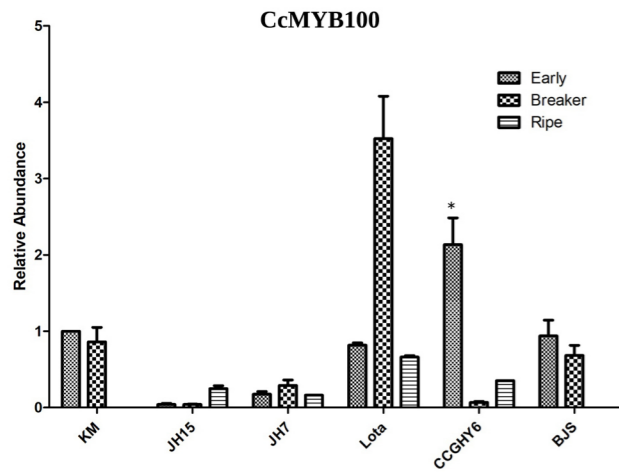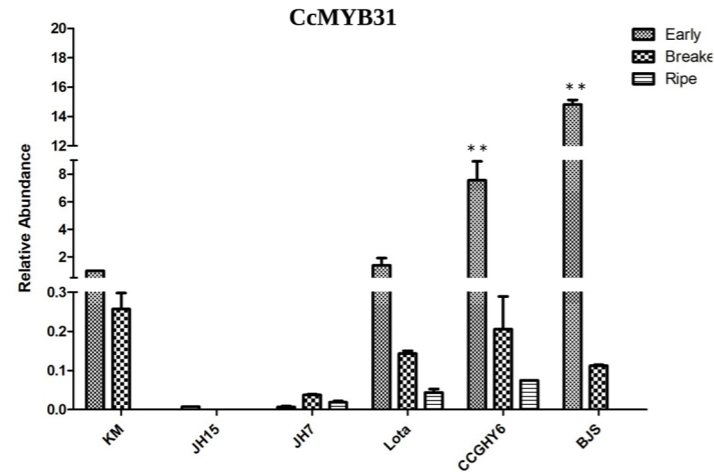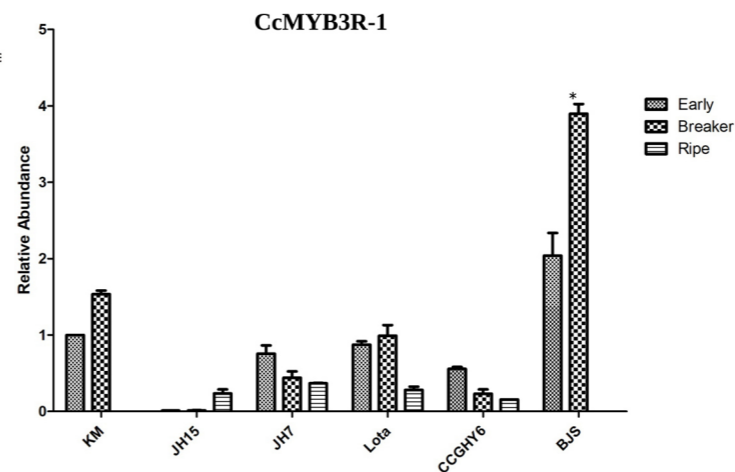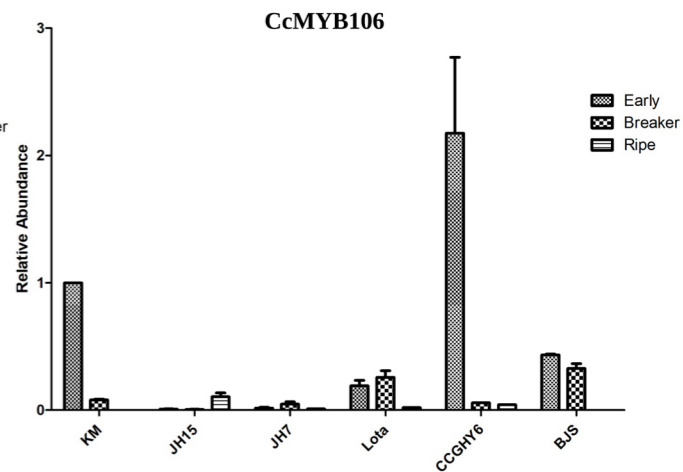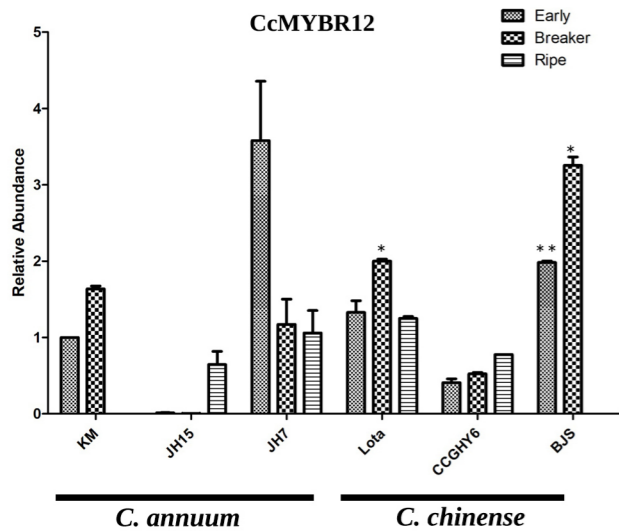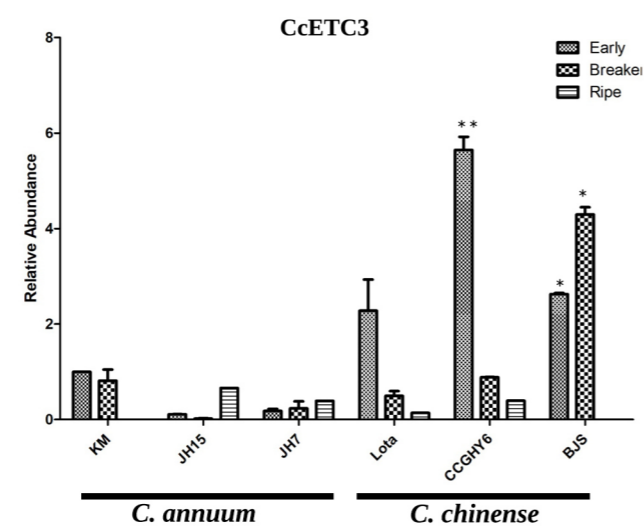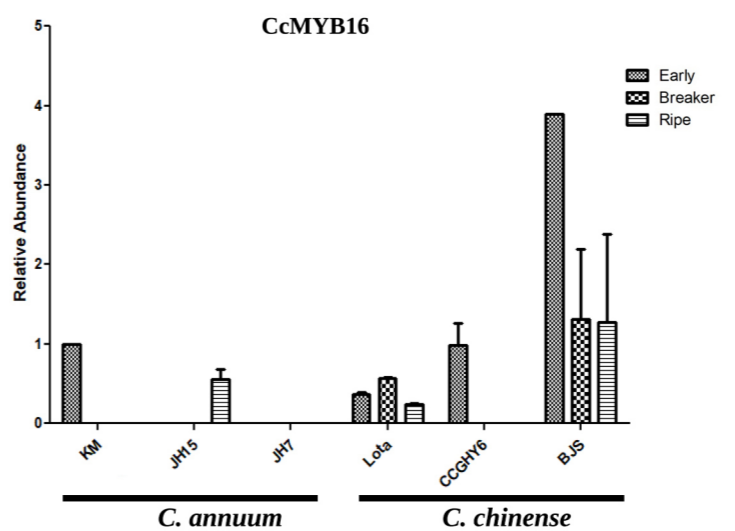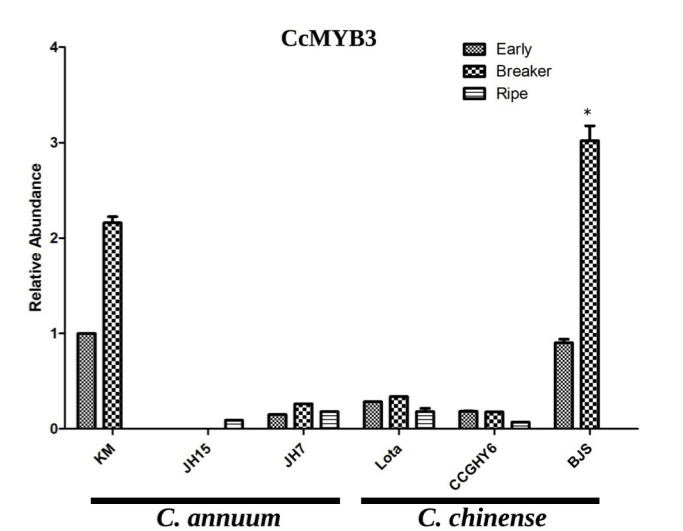

Supplement: Supplementary file 2 [file 31070026]

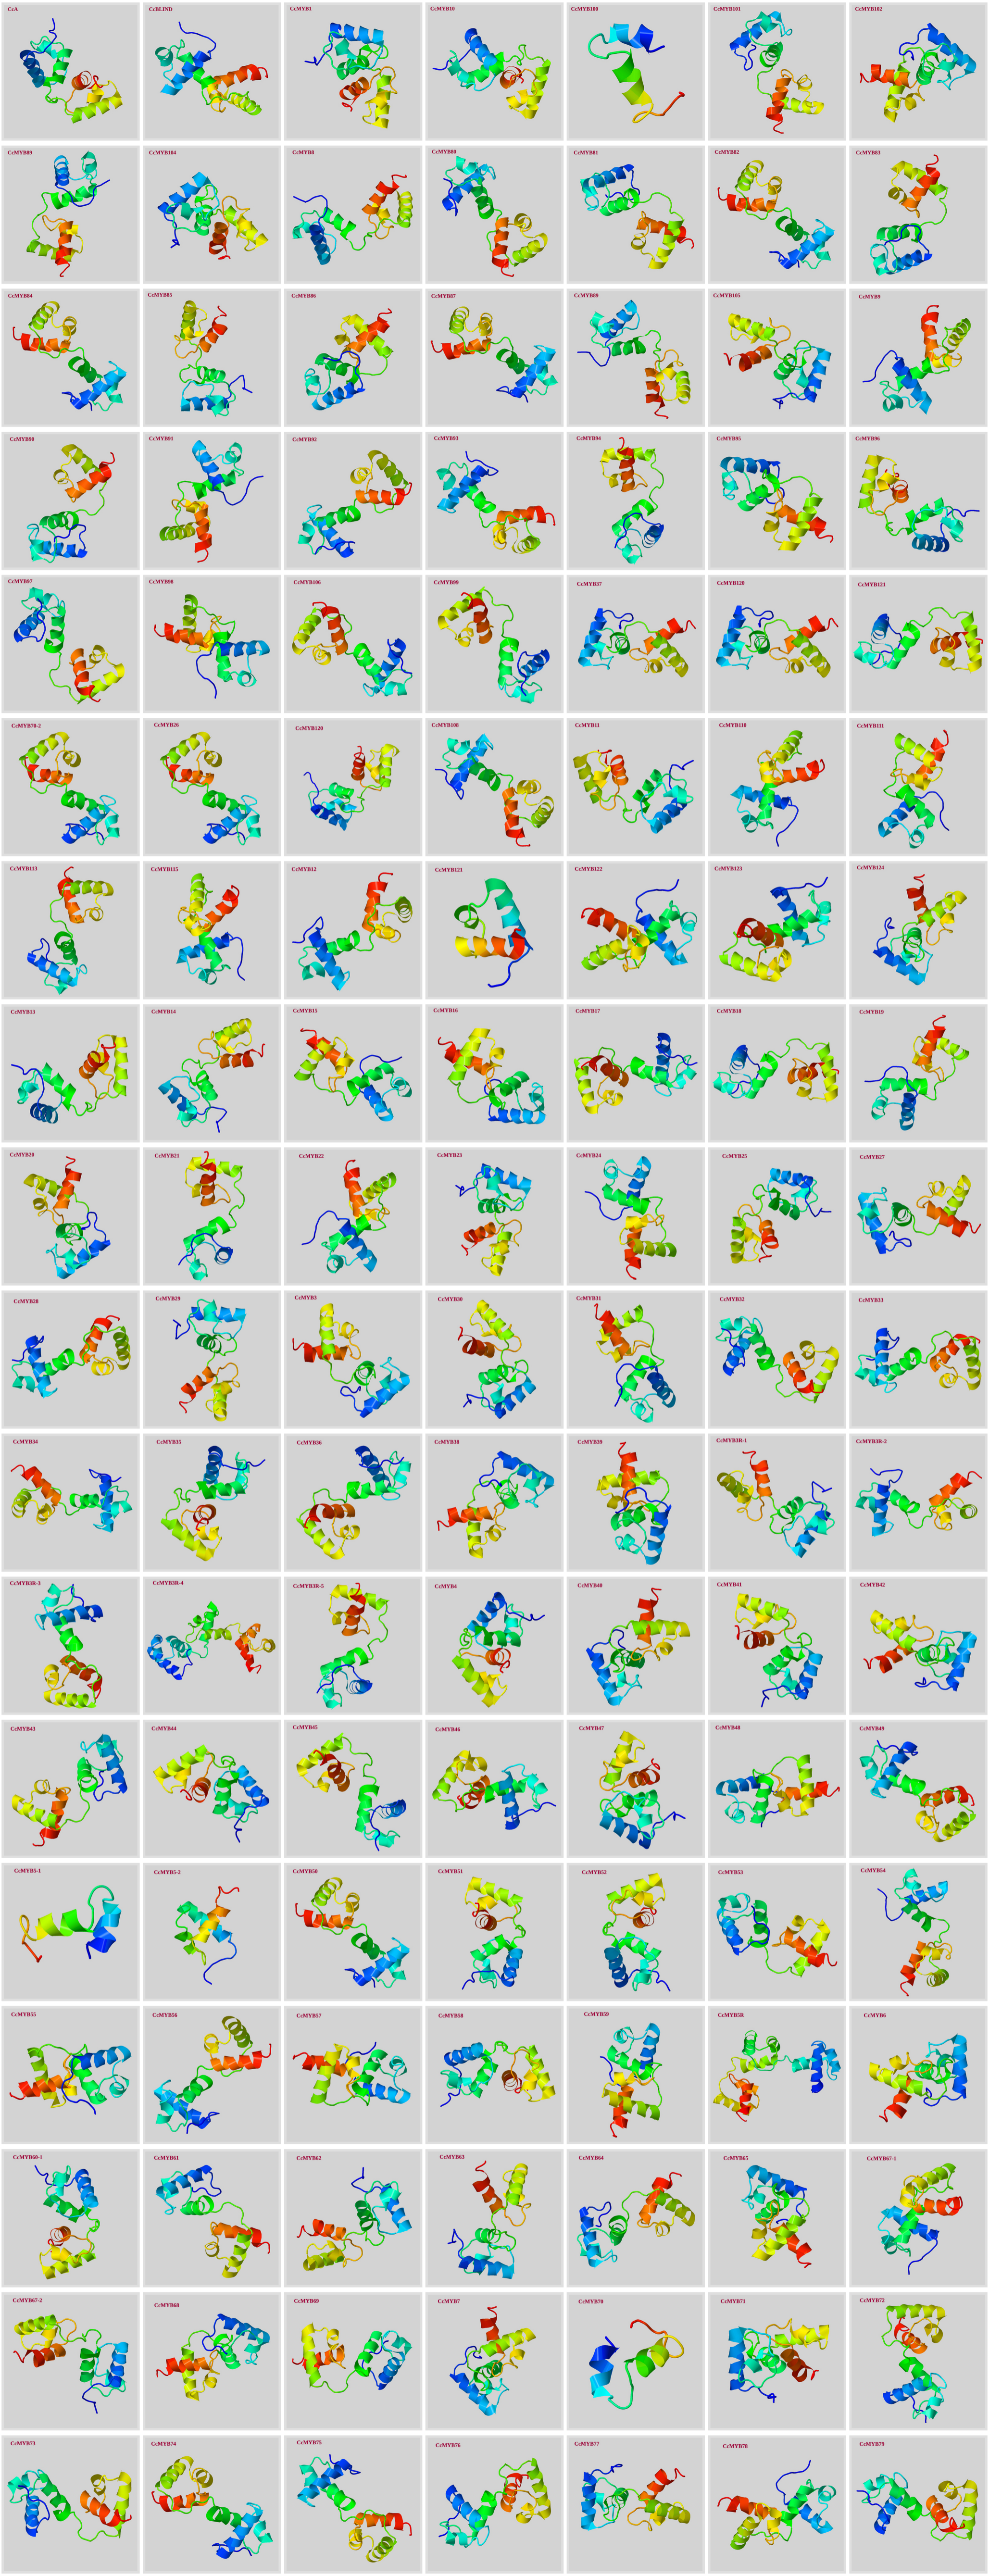

Supplement: Supplementary file 3 [file 31070026]

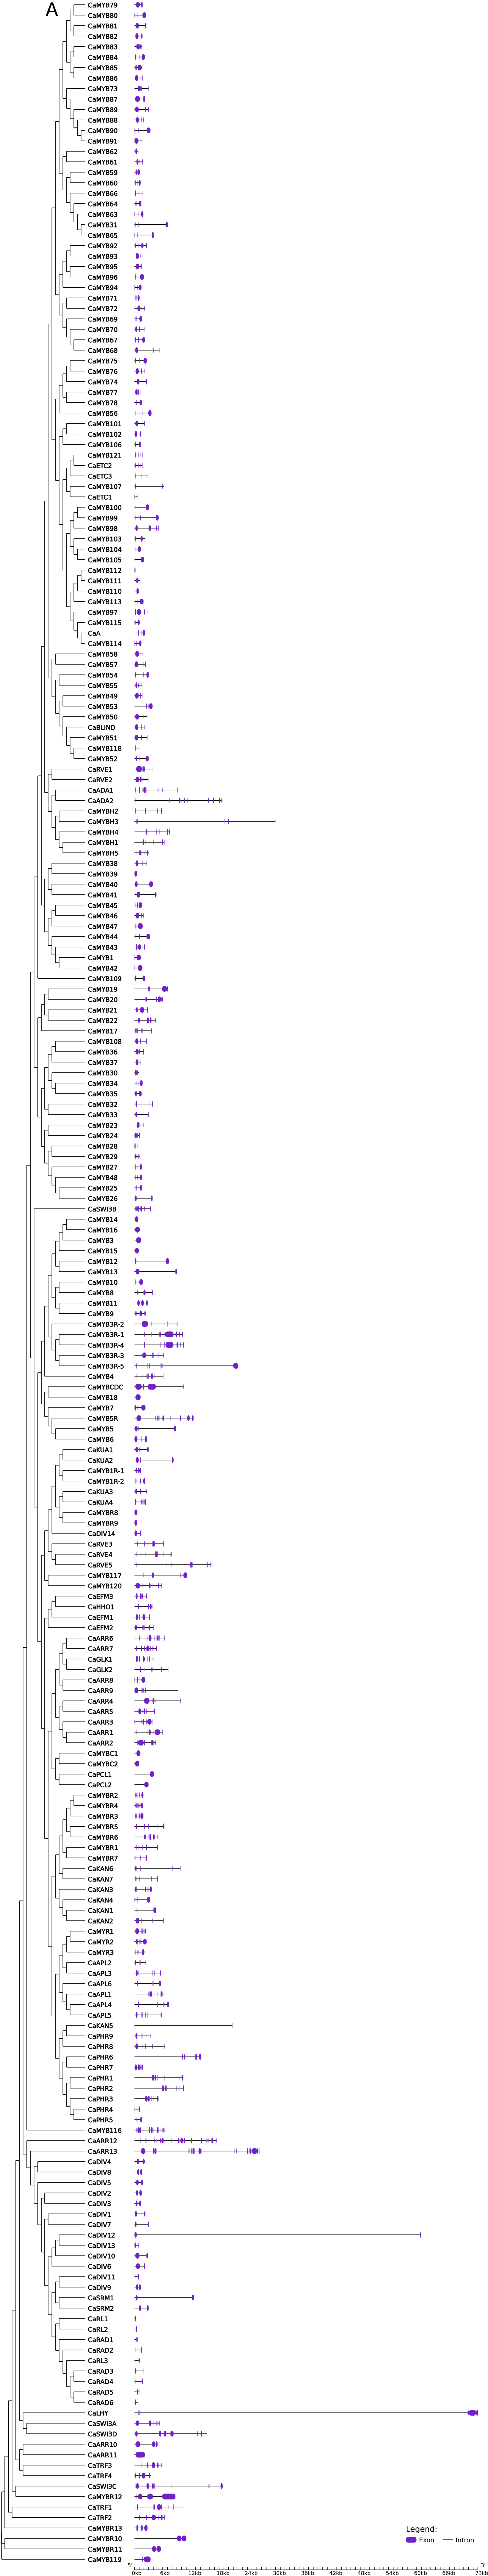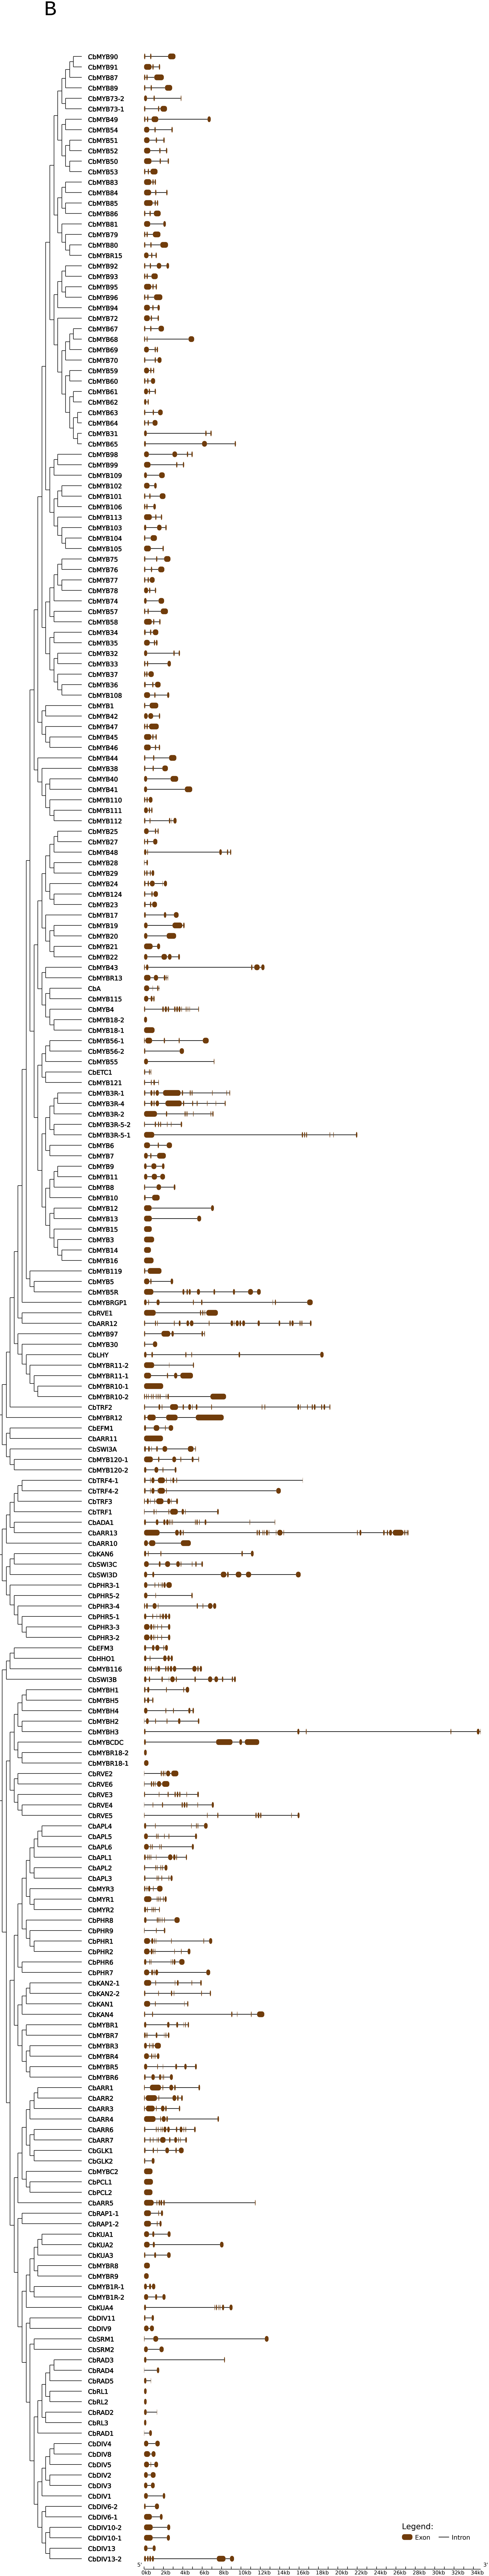

Supplement: Supplementary file 4 [file 31070026]

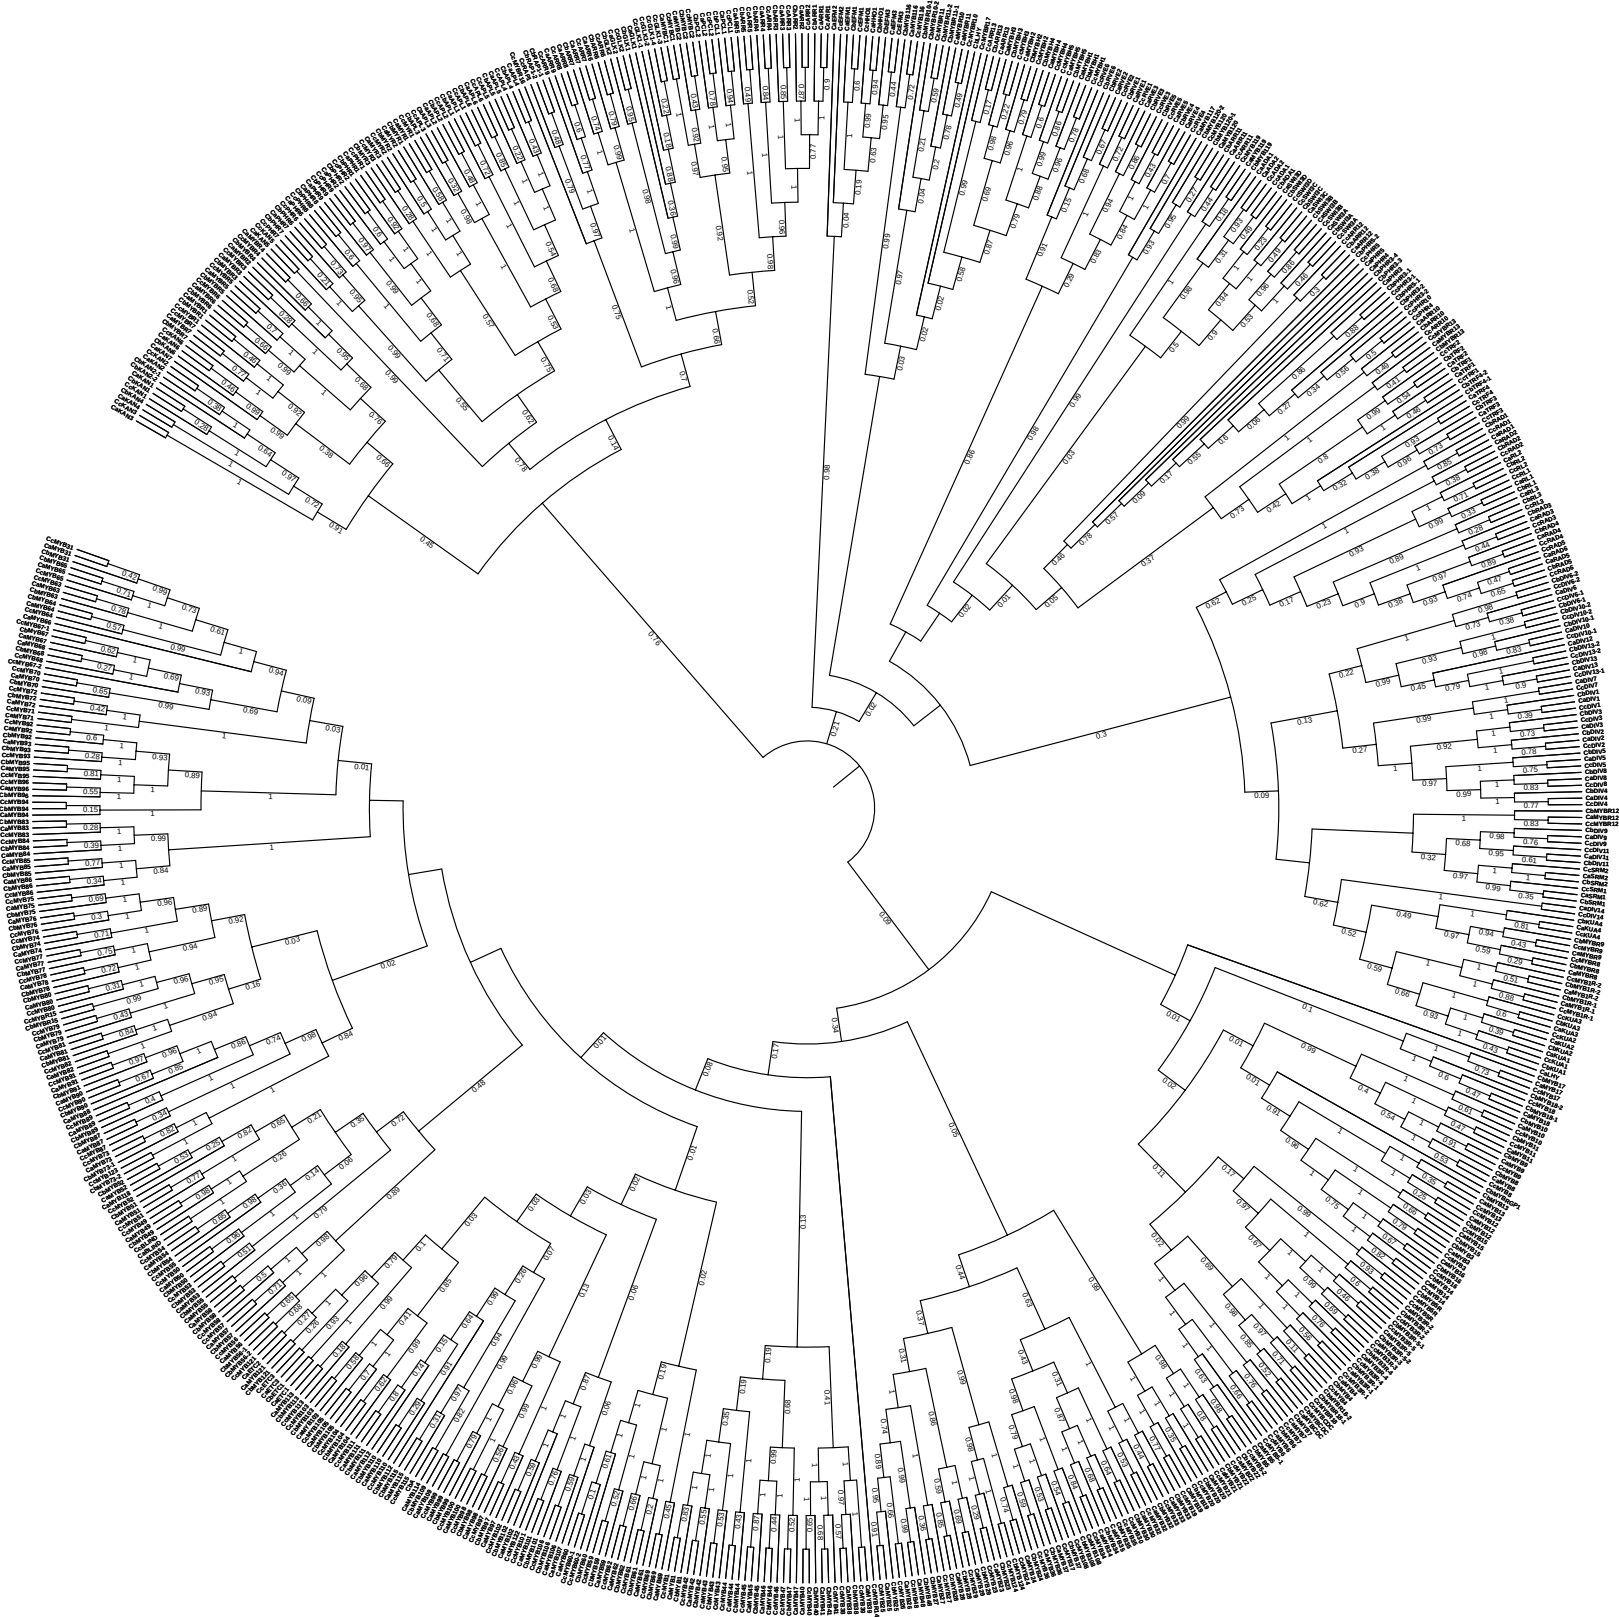

Supplement: Supplementary file 5 [file 31070026]

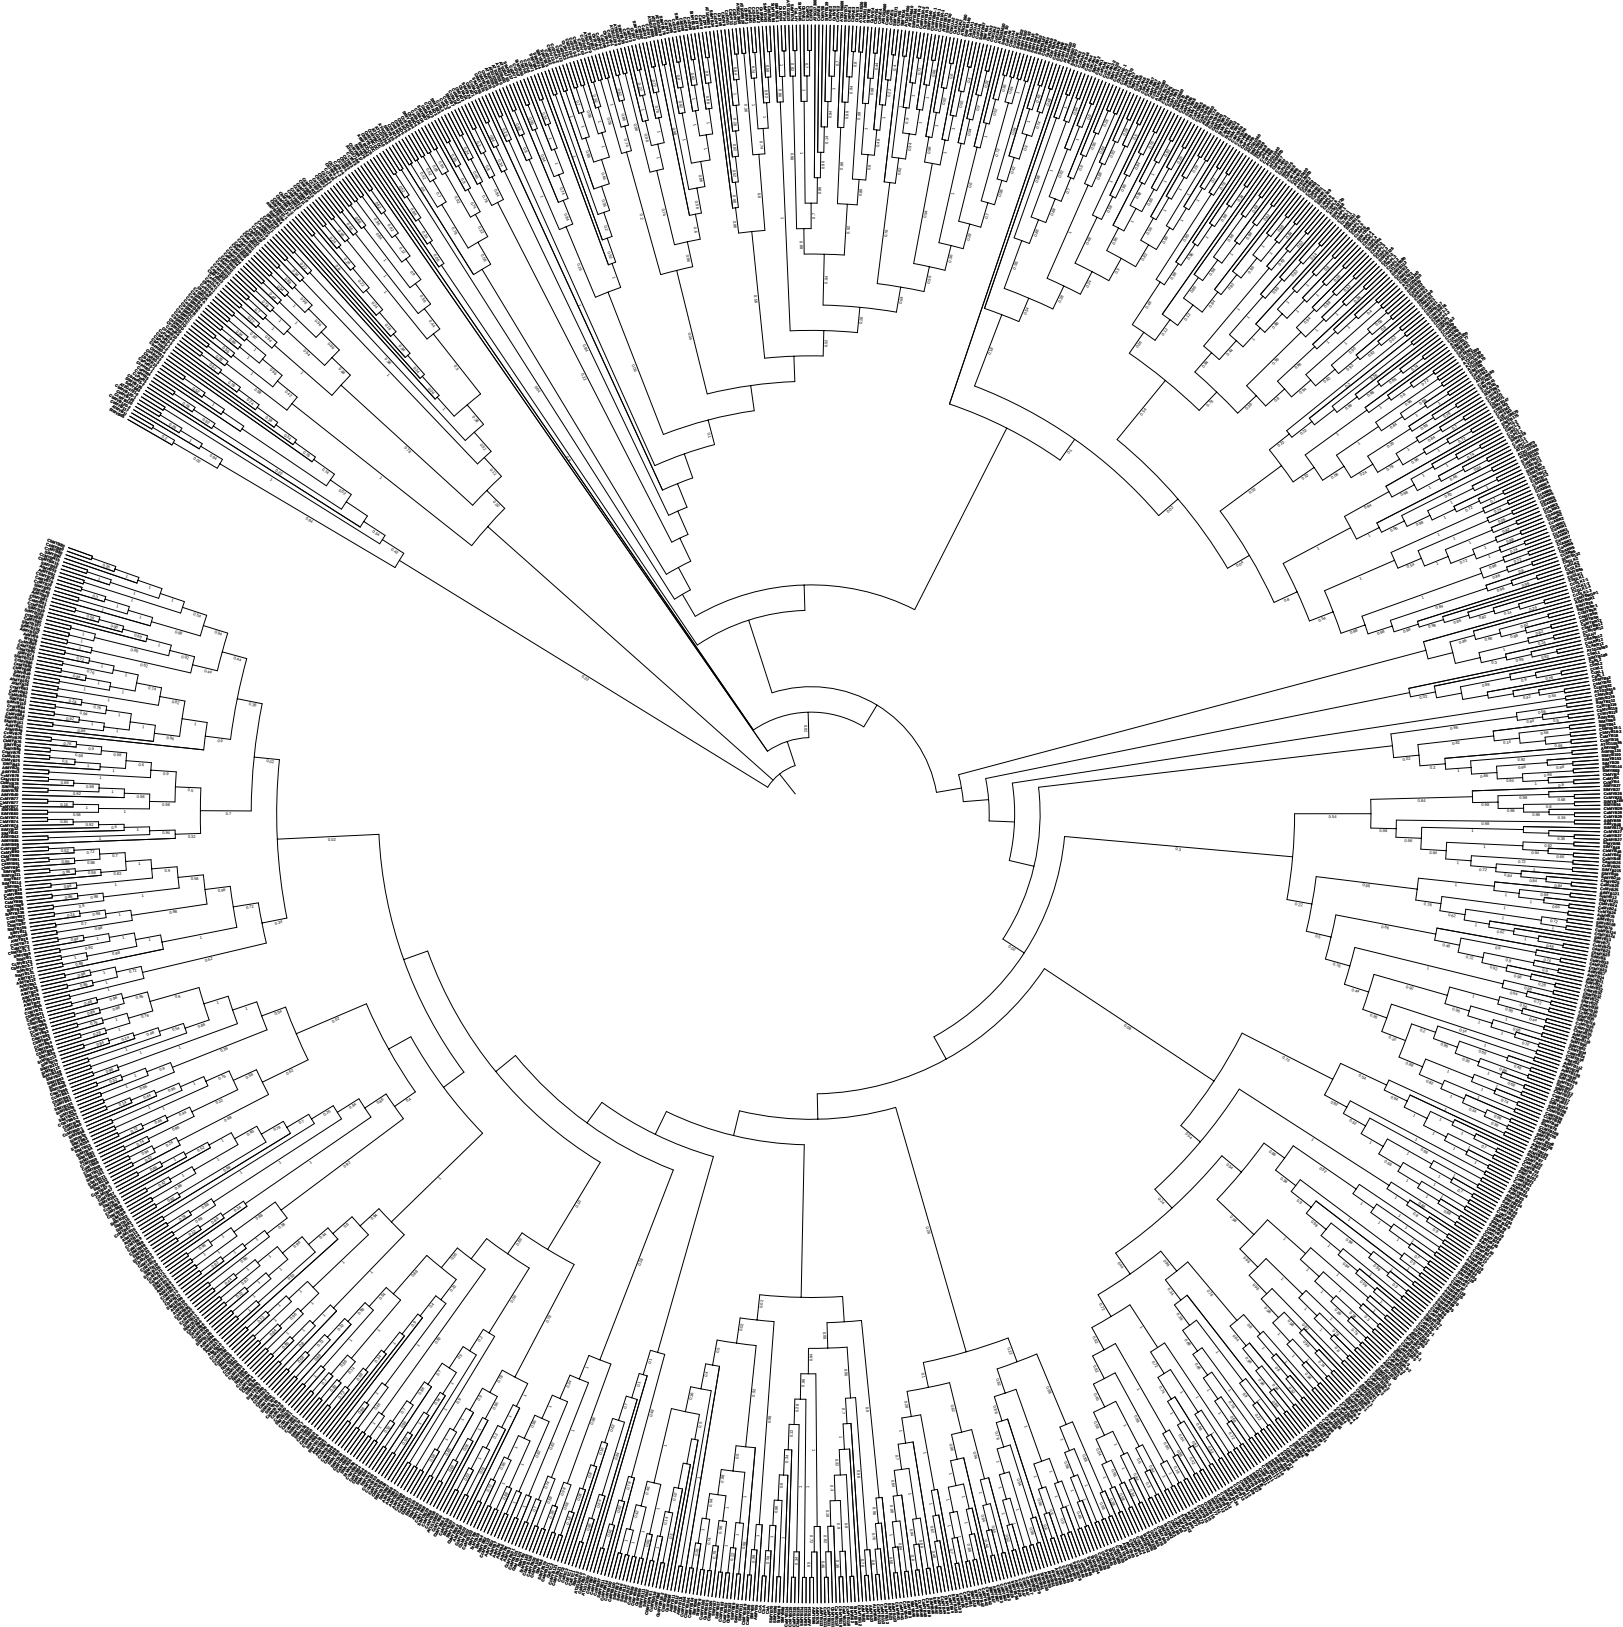

Supplement: Supplementary file 6 [file 31070026]
